# Supplementary material for: Gold-catalyzed domino cyclization enabling construction of diverse fused azaspiro tetracyclic scaffolds: a cascade catalysis mechanism due to a substrate and counterion
Source: Royal Society of Chemistry journal article supplement (doi:10.1039/d0cy00120a), 2020-01-01
Supplement: d0cy00120a1.pdf [file d0cy00120a1.pdf]

# Gold-catalyzed domino cyclization enabling construction of diverse fused azaspiro tetracyclic scaffolds: A cascade catalysis mechanism due to substrate and counterion

*Yunhe Li, Xiang Zhao\**

Institute for Chemical Physics & Department of Chemistry, School of Science, State Key Laboratory of Electrical Insulation and Power Equipment & MOE Key Laboratory for Nonequilibrium Synthesis and Modulation of Condensed Matter, Xi'an Jiaotong University, Xi'an710049, China

## Table of contents

|                                                                                        |           |
|----------------------------------------------------------------------------------------|-----------|
| <b>1. Alternative pathway in cooperative catalysis and cascade catalysis.....</b>      | <b>S3</b> |
| <b>2. optimized intermediates and transition structures in Fig. 1 in Fig. S2.....</b>  | <b>S4</b> |
| <b>3. optimized intermediates and transition structures in Fig. 2 in Fig. S3.....</b>  | <b>S3</b> |
| <b>2. NCI analysis of rate-determining transition states in Fig. S4.....</b>           | <b>S3</b> |
| <b>3. optimized intermediates and transition structures in Fig. 3a in Fig. S5.....</b> | <b>S4</b> |
| <b>4. optimized intermediates and transition structures in Fig. 3b in Fig. S6.....</b> | <b>S5</b> |
| <b>5. NCI analysis of rate-determining transition states in Fig. S7 .....</b>          | <b>S5</b> |
| <b>6. NCI analysis of rate-determining transition states in Fig. S8 .....</b>          | <b>S6</b> |
| <b>7. optimized intermediates and transition structures in Fig. 4 in Fig. S9.....</b>  | <b>S6</b> |
| <b>8. optimized structures for different counterions in Fig. S10.....</b>              | <b>S7</b> |
| <b>9. optimized structures for different ligands in Fig. S11.....</b>                  | <b>S8</b> |

|                                                                                      |            |
|--------------------------------------------------------------------------------------|------------|
| <b>10. Thermodynamic properties of the structures in Table S1 .....</b>              | <b>S8</b>  |
| <b>11. Thermodynamic properties of the structures in Table S2.....</b>               | <b>S9</b>  |
| <b>12. Thermodynamic properties of the structures in Table S3 .....</b>              | <b>S10</b> |
| <b>13. Thermodynamic properties of the structures in Table S4.....</b>               | <b>S11</b> |
| <b>14. Thermodynamic properties of the structures in Table S5.....</b>               | <b>S12</b> |
| <b>15. Cartesian coordinates of the stationary points discussed in the text.....</b> | <b>S13</b> |

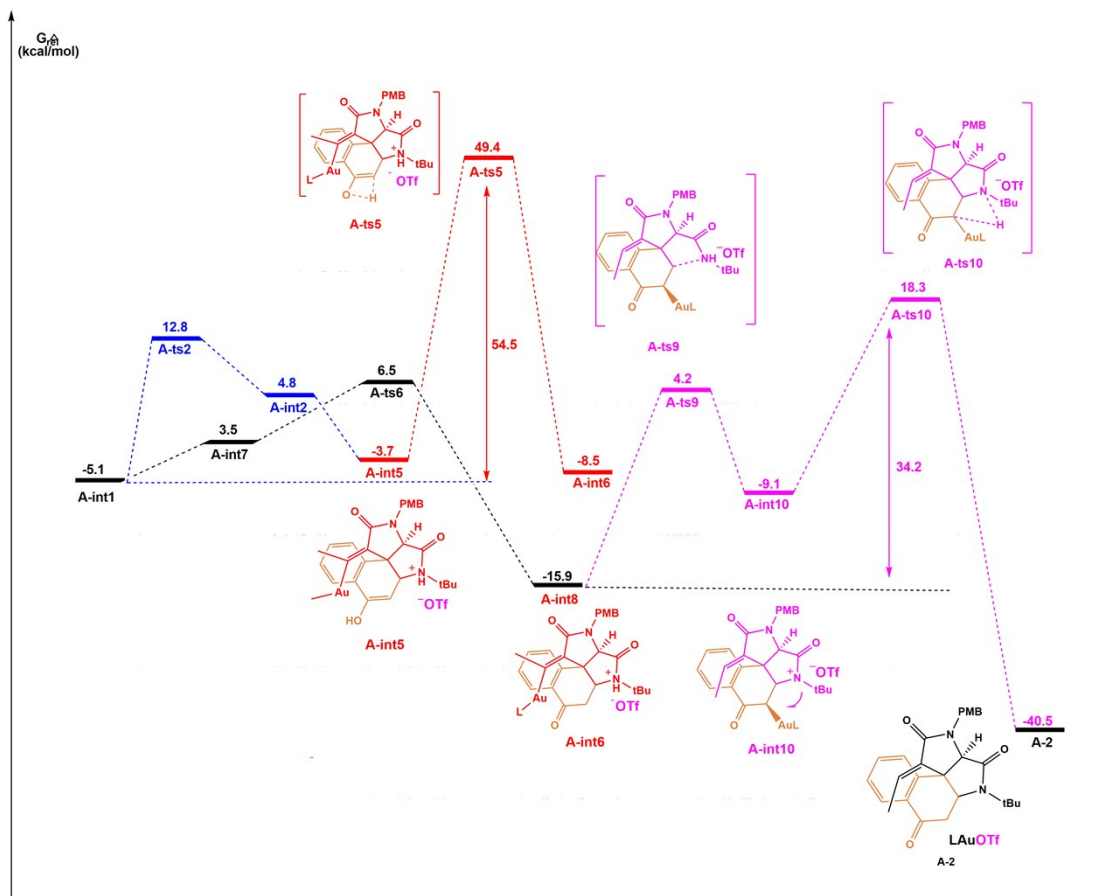

Fig. S1. alternative pathway in cooperative catalysis and cascade catalysis.

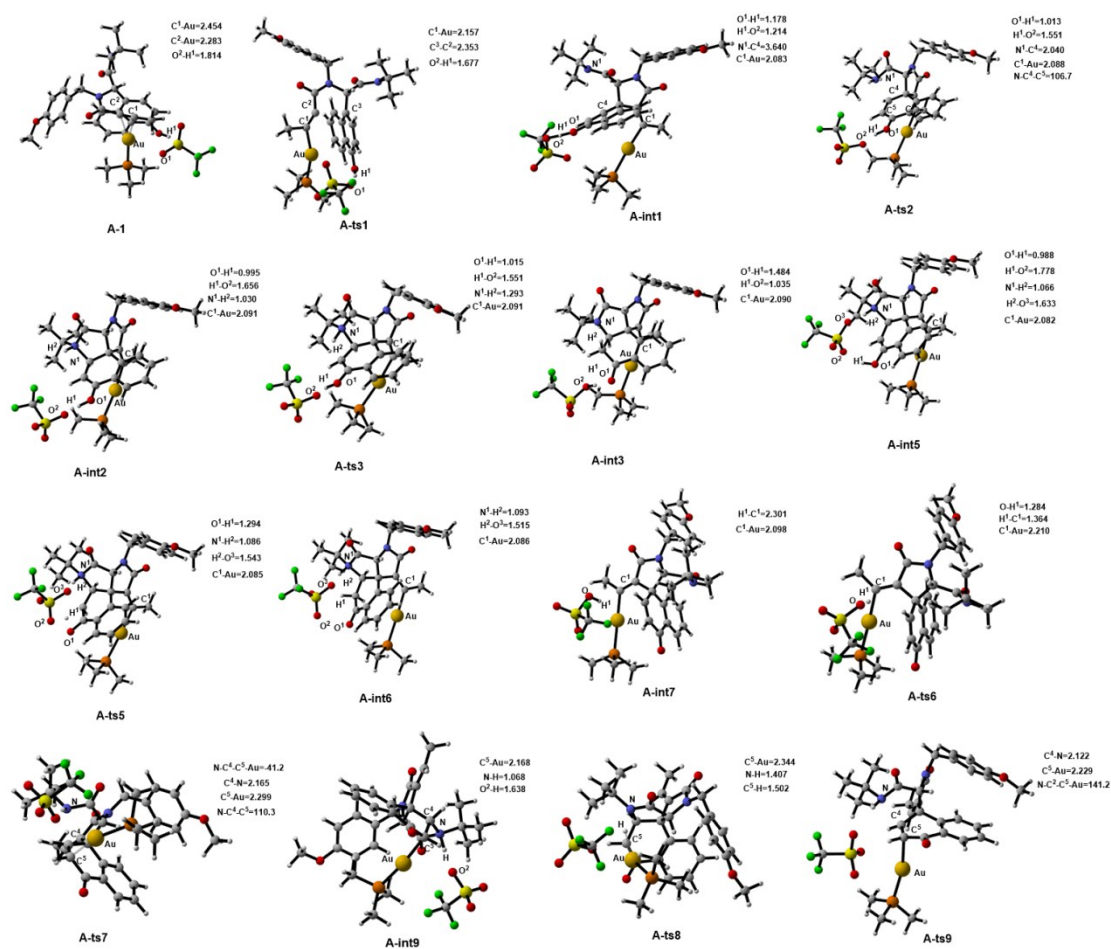

**Fig. S2.** Optimized geometries of transition states and intermediates shown in Fig. 1. Color scheme: C, gray; N, blue; O, red; Cl, green; P, orange; Au, yellow.

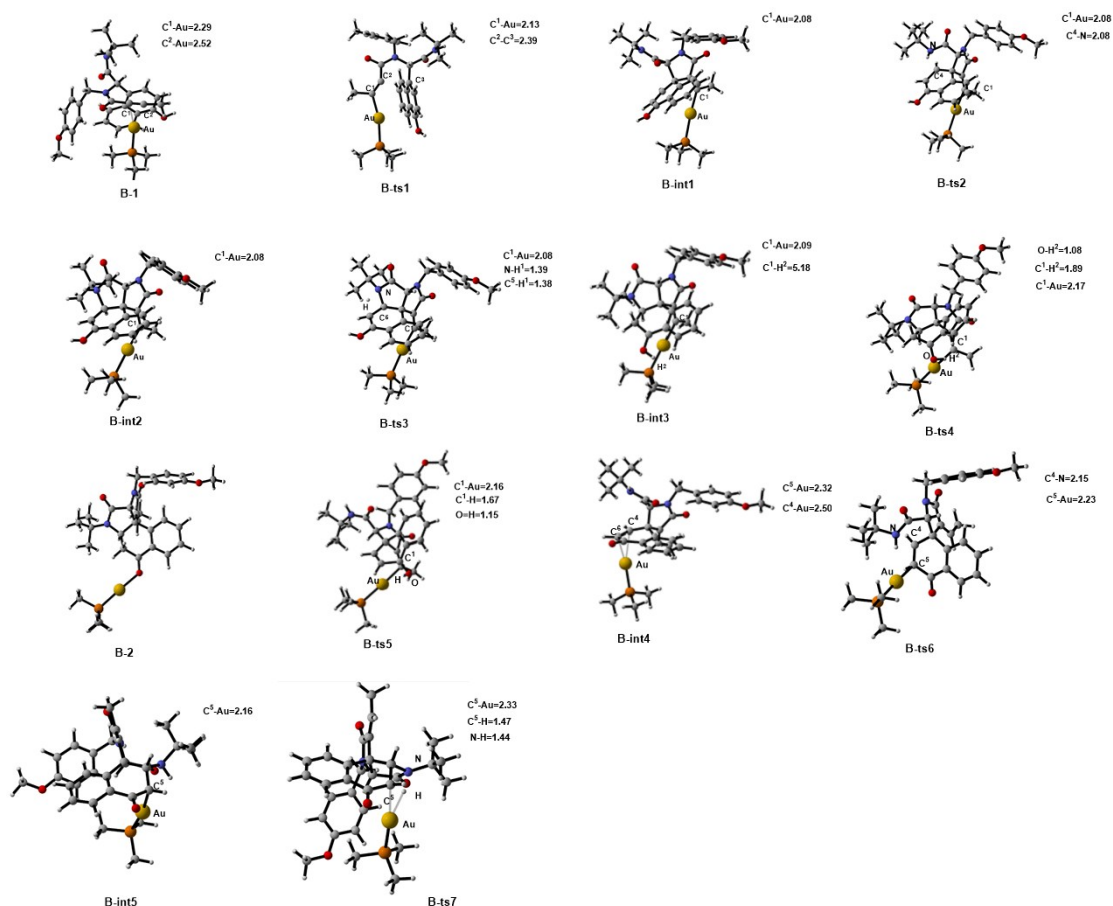

**Fig. S3.** Optimized geometries of transition states and intermediates shown in Fig. 2. Color scheme: C, gray; N, blue; O, red; Cl, green; P, orange; Au, yellow.

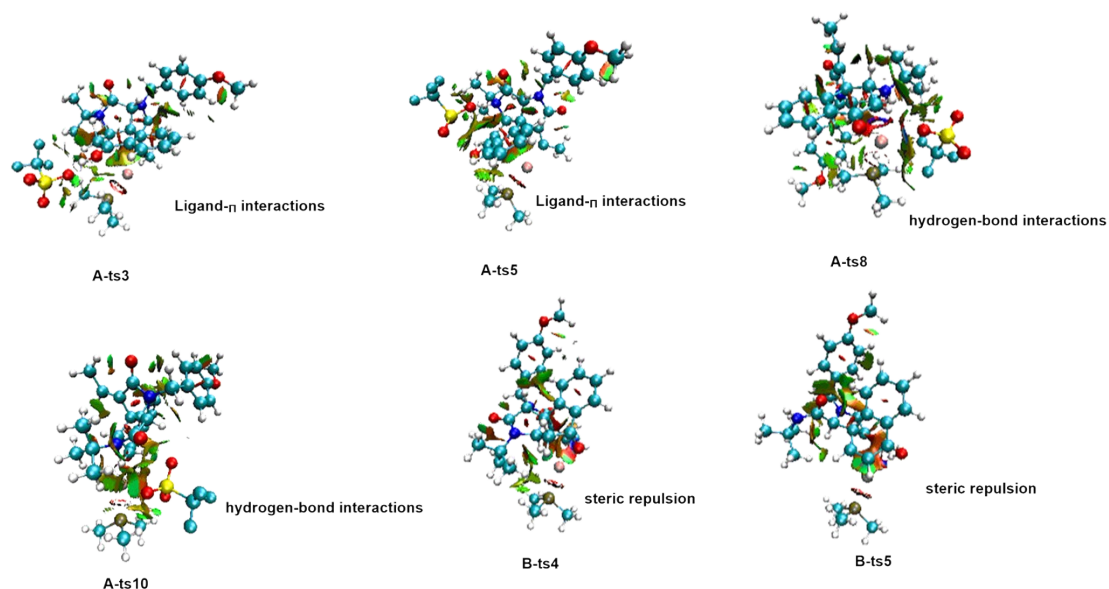

**Fig. S4.** Noncovalent interaction (NCI) plot for the rate-determining transition states. The green, blue and red regions respectively represent attractive, strongly and repulsive interactions.

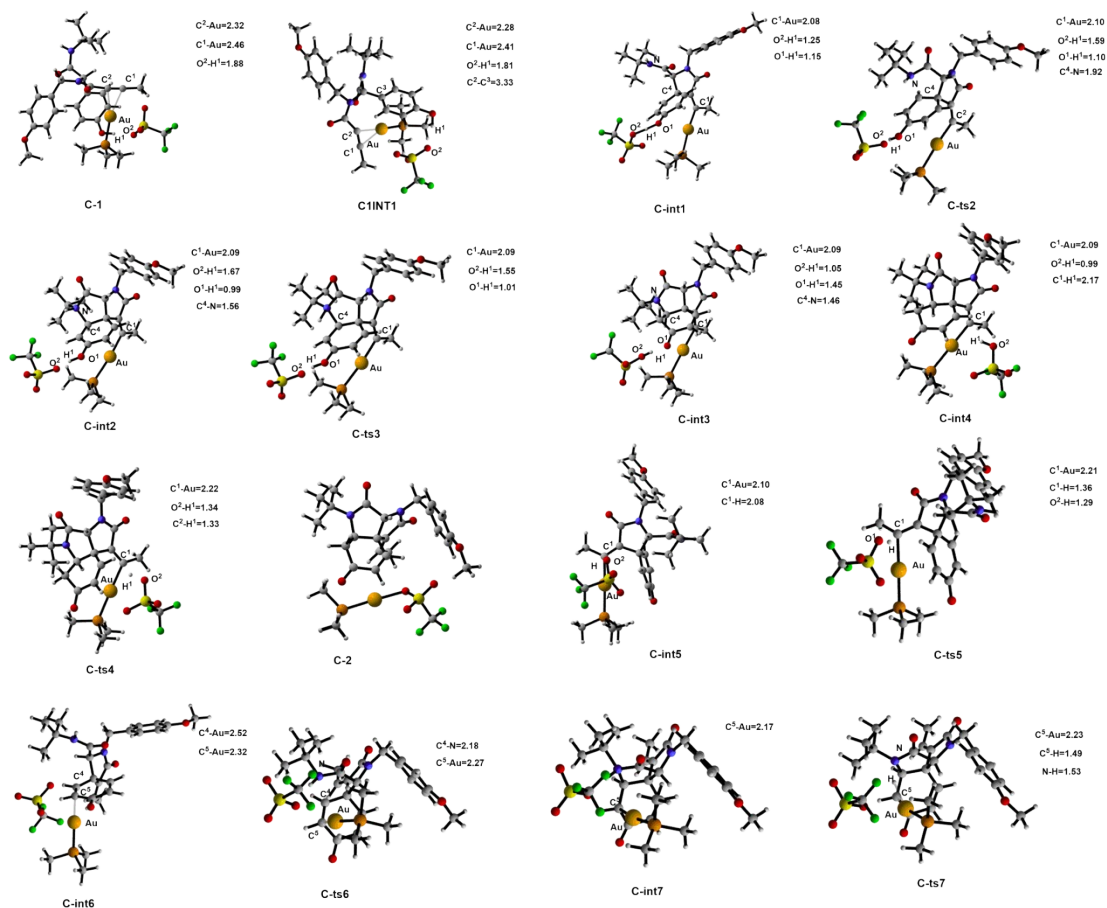

**Fig. S5.** Optimized geometries of transition states and intermediates shown in Fig. 3a.

Color scheme: C, gray; N, blue; O, red; Cl, green; P, orange; Au, yellow.

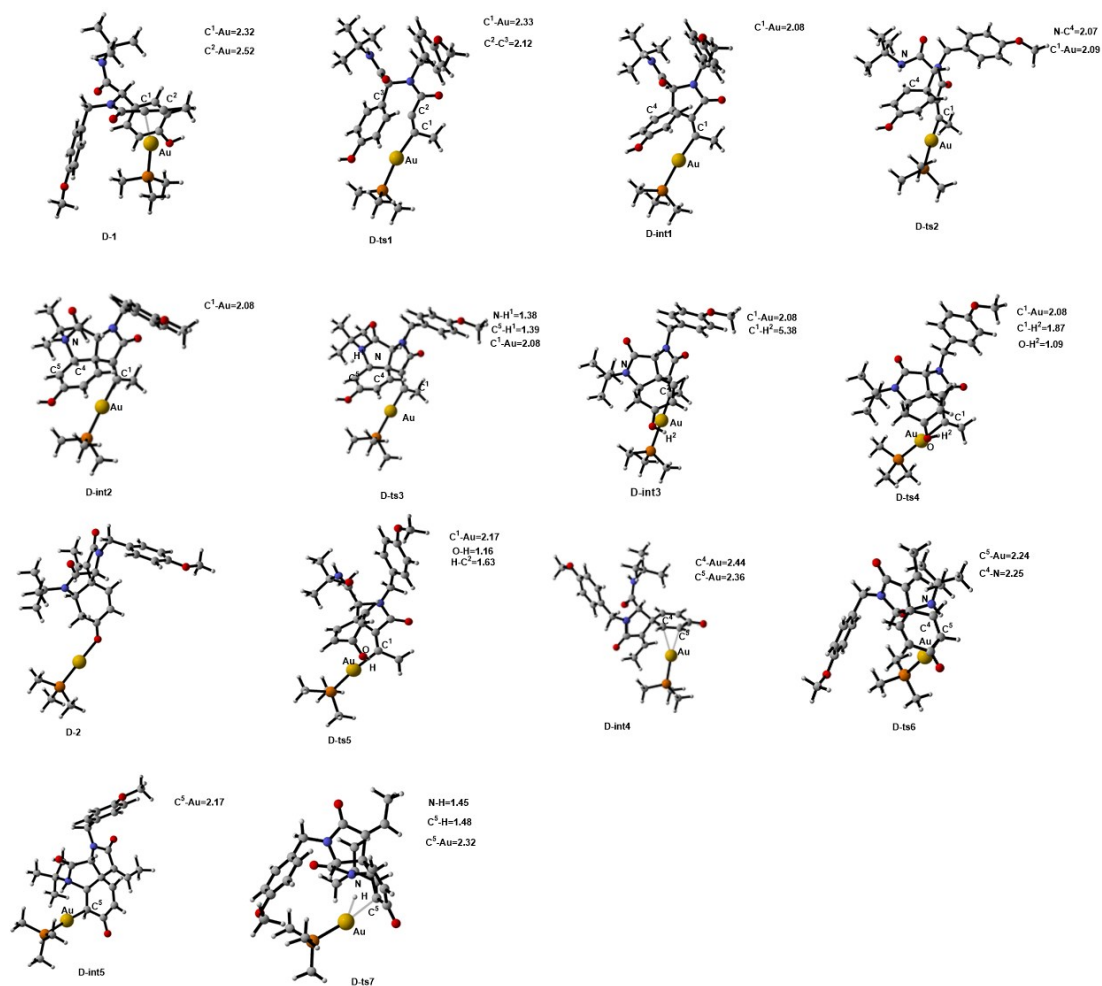

**Fig. S6.** Optimized geometries of transition states and intermediates shown in Fig. 3b. Color scheme: C, gray; N, blue; O, red; Cl, green; P, orange; Au, yellow.

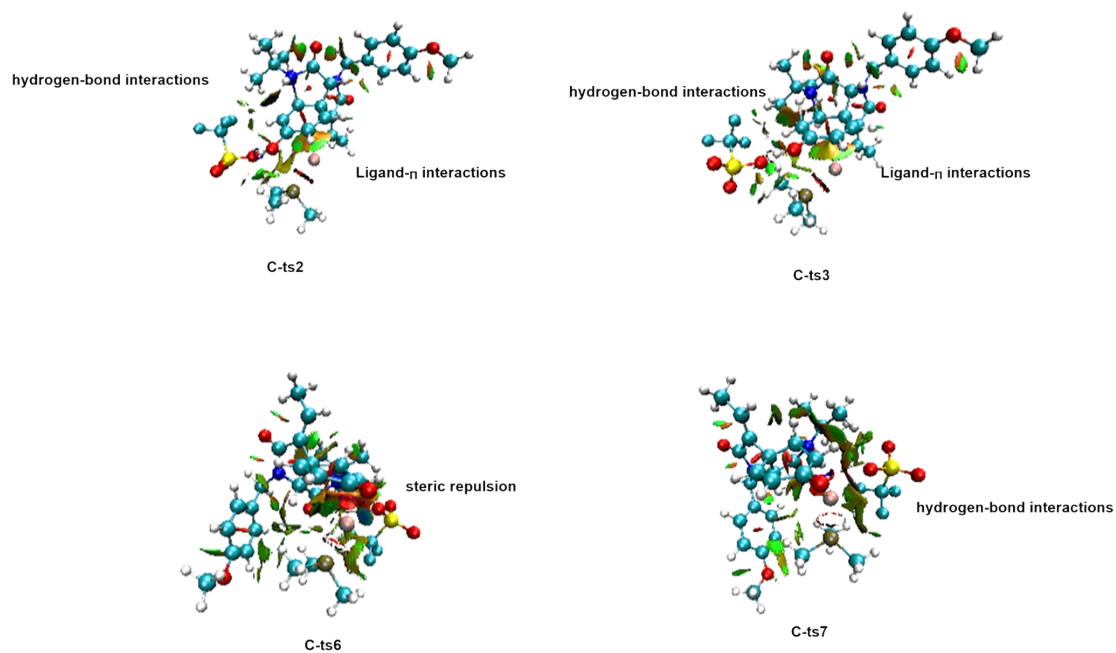

**Fig. S7.** Noncovalent interaction (NCI) plot for the rate-determining transition states. The green, blue and red regions respectively represent attractive, strongly and repulsive interactions.

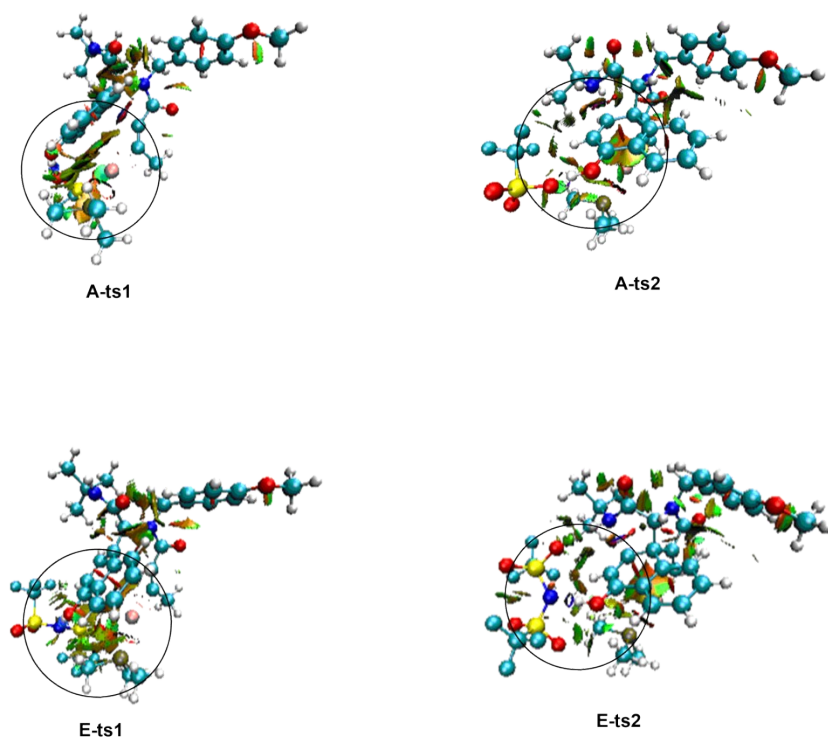

**Fig. S8.** Noncovalent interaction (NCI) plot for the rate-determining transition states. The green, blue and red regions respectively represent attractive, strongly and repulsive interactions.



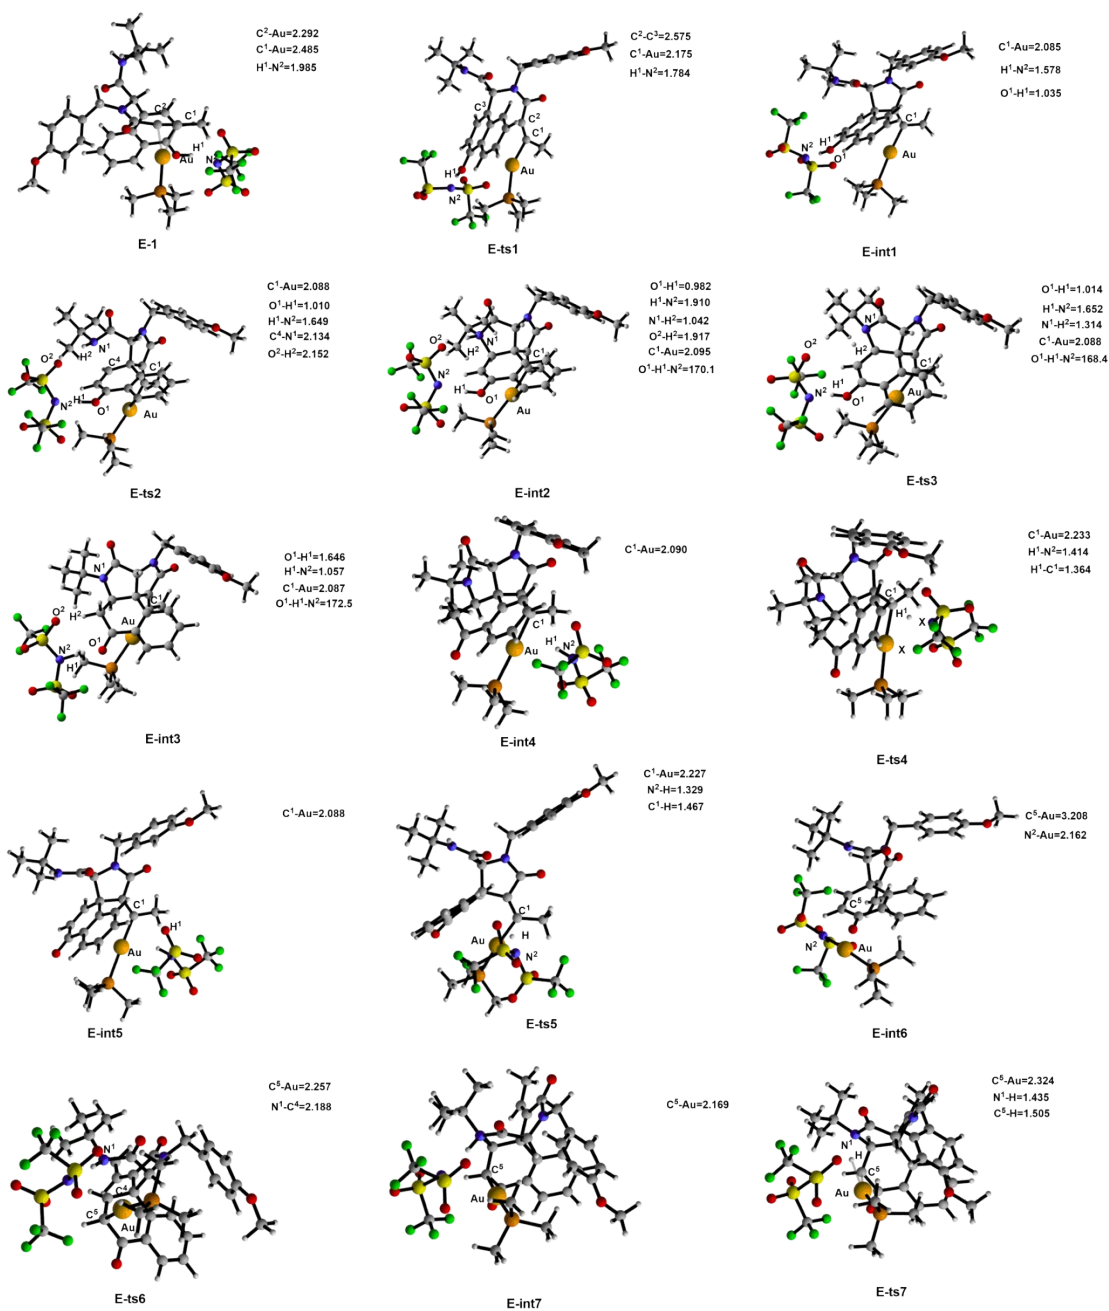

**Fig. S9.** Optimized geometries of transition states and intermediates shown in Fig. 4.

Color scheme: C, gray; N, blue; O, red; Cl, green; P, orange; Au, yellow.

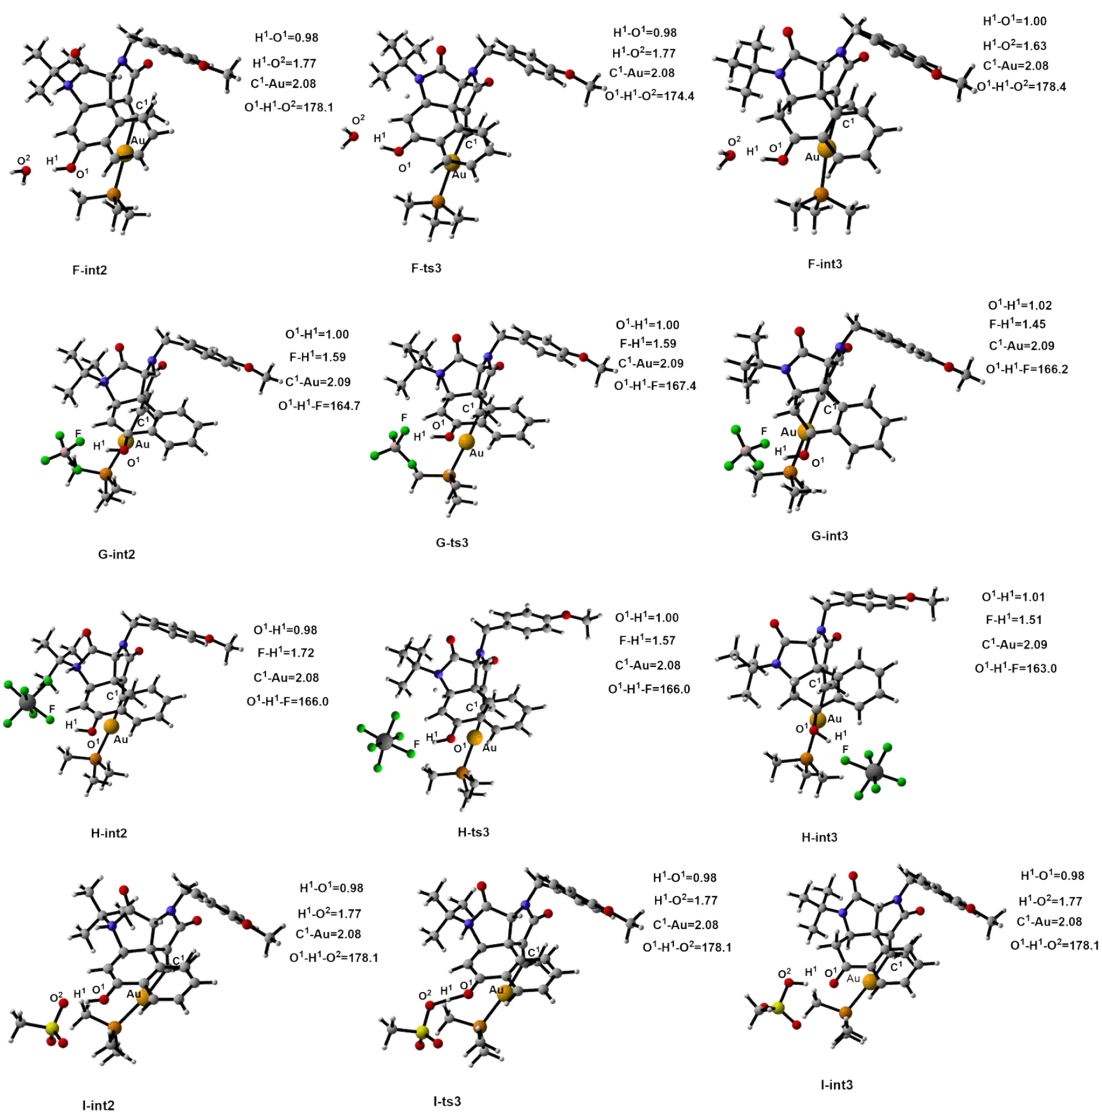

**Fig. S10.** Optimized transition states and intermediates for different counterions. Color scheme: C, gray; N, blue; O, red; Cl, green; P, orange; Au, yellow.

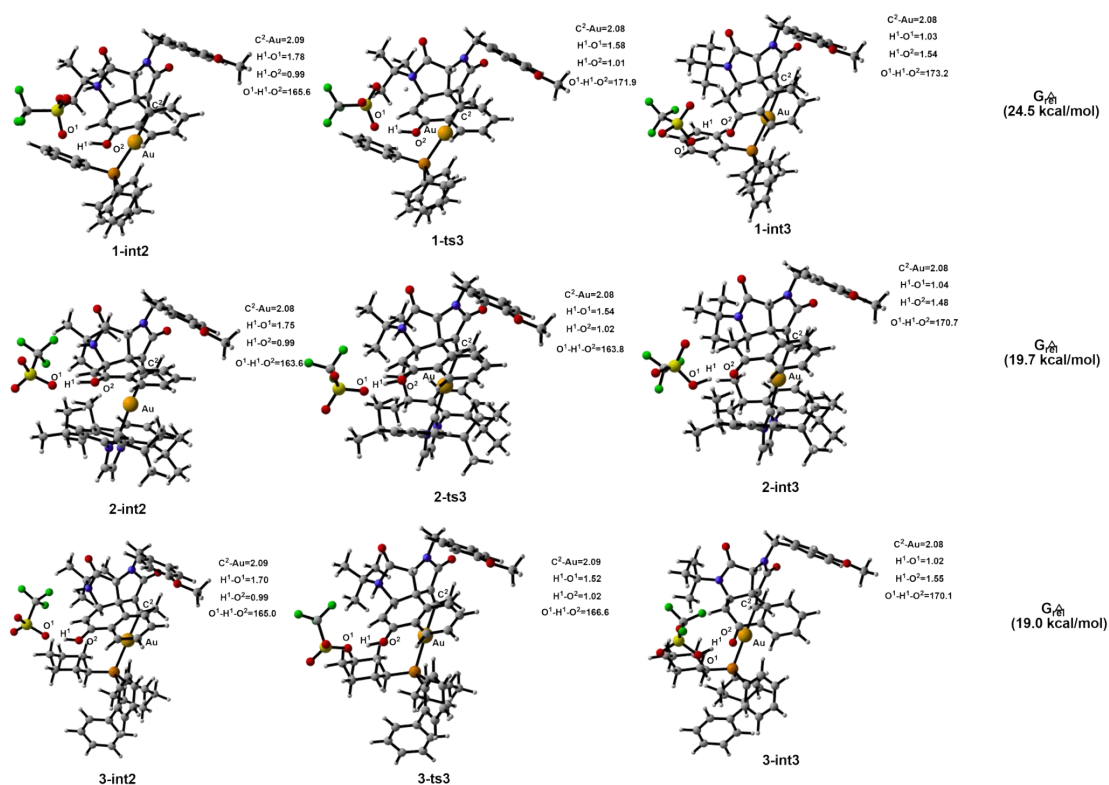

**Fig. S11.** Optimized transition states and intermediates for different ligands. Color scheme: C, gray; N, blue; O, red; Cl, green; P, orange; Au, yellow.

**Table S1.** Thermodynamic properties (relative free energies and activation free energies in gas phase and in solution) of the structures in Figure 1

| System        | $\Delta E^{\text{rel}}_{\text{gas}}$ | $\Delta G^{\text{rel}}_{\text{gas}}$ | $\Delta E^{\ddagger}_{\text{gas}}$ | $\Delta G^{\ddagger}_{\text{gas}}$ | $\Delta E^{\text{rel}}_{\text{sol}}$ | $\Delta G^{\text{rel}}_{\text{sol}}$ | $\Delta E^{\ddagger}_{\text{sol}}$ | $\Delta G^{\ddagger}_{\text{sol}}$ |
|---------------|--------------------------------------|--------------------------------------|------------------------------------|------------------------------------|--------------------------------------|--------------------------------------|------------------------------------|------------------------------------|
| <b>A-1</b>    | 0                                    | 0                                    |                                    |                                    | 0                                    | 0                                    |                                    |                                    |
| <b>A-ts1</b>  | 19.4                                 | 19.0                                 | 19.4                               | 19.0                               | 27.4                                 | 18.8                                 | 27.4                               | 18.8                               |
| <b>A-int1</b> | -5.5                                 | -6.1                                 |                                    |                                    | 2.4                                  | -5.1                                 |                                    |                                    |
| <b>A-ts2</b>  | 12.9                                 | 14.7                                 | 18.4                               | 20.8                               | 15.9                                 | 12.8                                 | 13.5                               | 18.0                               |
| <b>A-int2</b> | 7.6                                  | 10.0                                 |                                    |                                    | 1.4                                  | 4.8                                  |                                    |                                    |
| <b>A-ts3</b>  | 24.0                                 | 26.9                                 | 16.4                               | 16.9                               | 30.9                                 | 26.2                                 | 29.4                               | 21.3                               |
| <b>A-int3</b> | -20.8                                | -17.7                                |                                    |                                    | -5.4                                 | -14.9                                |                                    |                                    |
| <b>A-int4</b> | -22.9                                | -20.2                                |                                    |                                    | -12.6                                | -16.0                                |                                    |                                    |
| <b>A-ts4</b>  | -14.4                                | -12.7                                | 8.5                                | 7.5                                | -5.3                                 | -12.6                                | 7.4                                | 3.5                                |
| <b>A-2</b>    | -41.2                                | -39.7                                |                                    |                                    | -40.0                                | -40.5                                |                                    |                                    |

|                |       |      |      |      |       |       |      |      |
|----------------|-------|------|------|------|-------|-------|------|------|
| <b>A-int5</b>  | -5.9  | -4.5 |      |      | -6.2  | -3.7  |      |      |
| <b>A-ts5</b>   | 47.3  | 49.3 | 53.3 | 53.9 | 54.9  | 49.4  | 61.1 | 53.1 |
| <b>A-int6</b>  | -9.9  | -8.5 |      |      | -8.8  | -8.5  |      |      |
| <b>A-int7</b>  | 1.6   | 1.7  |      |      | 10.2  | 3.4   |      |      |
| <b>A-ts6</b>   | 7.4   | 7.6  | 5.8  | 5.9  | 14.9  | 6.5   | 4.7  | 3.1  |
| <b>A-int8</b>  | -9.0  | -8.2 |      |      | -12.8 | -15.9 |      |      |
| <b>A-ts7</b>   | 3.5   | 6.8  | 12.6 | 15.0 | 8.3   | 2.7   | 21.1 | 18.6 |
| <b>A-int9</b>  | -13.0 | -9.3 |      |      | -14.7 | -14.7 |      |      |
| <b>A-ts8</b>   | 17.7  | 19.9 | 30.7 | 29.2 | 19.4  | 12.1  | 34.2 | 26.8 |
| <b>A-int8</b>  | -9.0  | -8.2 |      |      | -12.8 | -15.9 |      |      |
| <b>A-ts9</b>   | 3.0   | 4.3  | 12.1 | 12.5 | 8.8   | 4.2   | 21.5 | 20.1 |
| <b>A-int10</b> | -9.6  | -8.5 |      |      | -8.0  | -9.1  |      |      |
| <b>A-ts10</b>  | 18.6  | 20.0 | 28.2 | 28.5 | 23.9  | 18.3  | 31.9 | 27.4 |

**Table S2.** Thermodynamic properties (relative free energies and activation free energies in gas phase and in solution) of the structures in Figure 2

| <b>System</b> | $\Delta E_{\text{gas}}^{\text{rel}}$ | $\Delta G_{\text{gas}}^{\text{rel}}$ | $\Delta E_{\text{gas}}^{\ddagger}$ | $\Delta G_{\text{gas}}^{\ddagger}$ | $\Delta E_{\text{sol}}^{\text{rel}}$ | $\Delta G_{\text{sol}}^{\text{rel}}$ | $\Delta E_{\text{sol}}^{\ddagger}$ | $\Delta G_{\text{sol}}^{\ddagger}$ |
|---------------|--------------------------------------|--------------------------------------|------------------------------------|------------------------------------|--------------------------------------|--------------------------------------|------------------------------------|------------------------------------|
| <b>B-1</b>    | 0                                    | 0                                    |                                    |                                    | 0                                    | 0                                    |                                    |                                    |
| <b>B-ts1</b>  | 16.5                                 | 16.1                                 | 16.5                               | 16.1                               | 25.7                                 | 12.5                                 | 25.7                               | 12.5                               |
| <b>B-int1</b> | -0.4                                 | -1.5                                 |                                    |                                    | 5.6                                  | -6.3                                 |                                    |                                    |
| <b>B-ts2</b>  | 5.0                                  | 5.4                                  | 5.4                                | 6.9                                | 10.0                                 | 0.5                                  | 4.4                                | 6.9                                |
| <b>B-int2</b> | -3.0                                 | -2.2                                 |                                    |                                    | -3.8                                 | -6.9                                 |                                    |                                    |
| <b>B-ts3</b>  | 20.8                                 | 21.5                                 | 23.9                               | 23.7                               | 30.5                                 | 17.0                                 | 34.4                               | 23.9                               |
| <b>B-int3</b> | -8.4                                 | -7.8                                 |                                    |                                    | -5.3                                 | -16.8                                |                                    |                                    |

|               |       |       |      |      |       |       |      |      |
|---------------|-------|-------|------|------|-------|-------|------|------|
| <b>B-ts4</b>  | 21.7  | 24.0  | 30.1 | 31.7 | 32.9  | 21.1  | 38.2 | 37.8 |
| <b>B-2</b>    | -40.2 | -40.9 |      |      | -39.4 | -47.5 |      |      |
| <b>B-int1</b> | -0.4  | -1.5  |      |      | 5.6   | -6.3  |      |      |
| <b>B-ts5</b>  | 41.9  | 42.9  | 42.3 | 44.4 | 53.5  | 38.9  | 47.9 | 45.3 |
| <b>B-int4</b> | -15.0 | -16.4 |      |      | -17.7 | -27.4 |      |      |
| <b>B-ts6</b>  | -1.6  | -1.9  | 13.4 | 14.5 | 4.5   | -8.7  | 22.2 | 18.7 |
| <b>B-int5</b> | -17.8 | -16.4 |      |      | -16.3 | -22.6 |      |      |
| <b>B-ts7</b>  | 2.7   | 4.2   | 20.5 | 20.6 | 10.0  | -1.8  | 26.2 | 20.8 |

**Table S3.** Thermodynamic properties (relative free energies and activation free energies in gas phase and in solution) of the structures in Figure 3a

| <b>System</b> | $\Delta E_{\text{gas}}^{\text{rel}}$ | $\Delta G_{\text{gas}}^{\text{rel}}$ | $\Delta E_{\text{gas}}^{\ddagger}$ | $\Delta G_{\text{gas}}^{\ddagger}$ | $\Delta E_{\text{sol}}^{\text{rel}}$ | $\Delta G_{\text{sol}}^{\text{rel}}$ | $\Delta E_{\text{sol}}^{\ddagger}$ | $\Delta G_{\text{sol}}^{\ddagger}$ |
|---------------|--------------------------------------|--------------------------------------|------------------------------------|------------------------------------|--------------------------------------|--------------------------------------|------------------------------------|------------------------------------|
| <b>C-1</b>    | 0                                    | 0                                    |                                    |                                    | 0                                    | 0                                    |                                    |                                    |
| <b>C-ts1</b>  | 4.6                                  | 5.3                                  | 4.6                                | 5.3                                | 6.6                                  | 6.0                                  | 6.6                                | 6.0                                |
| <b>C-int1</b> | 5.2                                  | 4.4                                  |                                    |                                    | 13.0                                 | 5.0                                  |                                    |                                    |
| <b>C-ts2</b>  | 25.5                                 | 26.8                                 | 20.3                               | 22.4                               | 26.6                                 | 23.6                                 | 13.6                               | 18.7                               |
| <b>C-int2</b> | 22.2                                 | 23.3                                 |                                    |                                    | 16.3                                 | 18.2                                 |                                    |                                    |
| <b>C-ts3</b>  | 37.1                                 | 38.4                                 | 14.9                               | 15.1                               | 43.8                                 | 37.9                                 | 27.6                               | 19.7                               |
| <b>C-int3</b> | -9.0                                 | -7.2                                 |                                    |                                    | 1.8                                  | -4.2                                 |                                    |                                    |
| <b>C-int4</b> | -8.0                                 | -7.6                                 |                                    |                                    | 2.9                                  | -3.7                                 |                                    |                                    |
| <b>C-ts4</b>  | 0.6                                  | 2.3                                  | 8.6                                | 9.8                                | 9.5                                  | 2.3                                  | 6.6                                | 6.0                                |
| <b>C-2</b>    | -26.5                                | -25.1                                |                                    |                                    | -24.4                                | -25.9                                |                                    |                                    |
| <b>C-int5</b> | 14.1                                 | 14.1                                 |                                    |                                    | 22.7                                 | 15.4                                 |                                    |                                    |
| <b>C-ts5</b>  | 16.7                                 | 16.9                                 | 2.6                                | 2.8                                | 25.1                                 | 16.2                                 | 2.4                                | 0.8                                |

|               |      |      |      |      |      |      |      |      |
|---------------|------|------|------|------|------|------|------|------|
| <b>C-int6</b> | 2.9  | 2.7  |      |      | 0.6  | -4.7 |      |      |
| <b>C-ts6</b>  | 17.8 | 21.7 | 14.9 | 19.0 | 22.3 | 17.7 | 21.8 | 22.4 |
| <b>C-int7</b> | 1.2  | 5.3  |      |      | -0.8 | 0.4  |      |      |
| <b>C-ts7</b>  | 31.1 | 32.9 | 30.0 | 27.6 | 32.8 | 25.6 | 33.6 | 25.2 |

**Table S4.** Thermodynamic properties (relative free energies and activation free energies in gas phase and in solution) of the structures in Figure 3b

| <b>System</b> | $\Delta E_{\text{gas}}^{\text{rel}}$ | $\Delta G_{\text{gas}}^{\text{rel}}$ | $\Delta E_{\text{gas}}^{\ddagger}$ | $\Delta G_{\text{gas}}^{\ddagger}$ | $\Delta E_{\text{sol}}^{\text{rel}}$ | $\Delta G_{\text{sol}}^{\text{rel}}$ | $\Delta E_{\text{sol}}^{\ddagger}$ | $\Delta G_{\text{sol}}^{\ddagger}$ |
|---------------|--------------------------------------|--------------------------------------|------------------------------------|------------------------------------|--------------------------------------|--------------------------------------|------------------------------------|------------------------------------|
| <b>D-1</b>    | 0                                    | 0                                    |                                    |                                    | 0                                    | 0                                    |                                    |                                    |
| <b>D-ts1</b>  | 22.2                                 | 22.3                                 | 22.2                               | 22.3                               | 25.4                                 | 22.9                                 | 25.4                               | 22.9                               |
| <b>D-int1</b> | 9.5                                  | 10.6                                 |                                    |                                    | 11.2                                 | 9.2                                  |                                    |                                    |
| <b>D-ts2</b>  | 20.5                                 | 22.0                                 | 11.0                               | 11.4                               | 20.4                                 | 21.7                                 | 9.2                                | 12.6                               |
| <b>D-int2</b> | 12.4                                 | 14.7                                 |                                    |                                    | 6.2                                  | 14.6                                 |                                    |                                    |
| <b>D-ts3</b>  | 36.6                                 | 37.0                                 | 24.2                               | 22.4                               | 40.0                                 | 36.3                                 | 33.8                               | 21.7                               |
| <b>D-int3</b> | 3.5                                  | 5.2                                  |                                    |                                    | 1.3                                  | 0.5                                  |                                    |                                    |
| <b>D-ts4</b>  | 39.3                                 | 41.8                                 | 35.8                               | 36.5                               | 44.9                                 | 42.1                                 | 43.6                               | 41.6                               |
| <b>D-2</b>    | -25.5                                | -27.7                                |                                    |                                    | -30.5                                | -30.2                                |                                    |                                    |
| <b>D-int1</b> | 9.5                                  | 10.6                                 |                                    |                                    | 11.2                                 | 9.2                                  |                                    |                                    |
| <b>D-ts5</b>  | 52.1                                 | 53.0                                 | 42.6                               | 42.4                               | 58.6                                 | 52.9                                 | 47.4                               | 44.6                               |
| <b>D-int4</b> | -10.2                                | -10.1                                |                                    |                                    | -14.8                                | -13.3                                |                                    |                                    |
| <b>D-ts6</b>  | 12.0                                 | 13.4                                 | 22.2                               | 23.6                               | 15.2                                 | 13.2                                 | 30.1                               | 24.8                               |
| <b>D-int5</b> | 1.1                                  | 2.2                                  |                                    |                                    | -3.2                                 | 0.4                                  |                                    |                                    |
| <b>D-ts7</b>  | 18.4                                 | 20.9                                 | 17.3                               | 18.6                               | 19.4                                 | 19.2                                 | 22.6                               | 18.4                               |

**Table S5.** Thermodynamic properties (relative free energies and activation free energies in gas phase and in solution) of the structures in Figure 4

| <b>System</b> | $\Delta E_{\text{gas}}^{\text{rel}}$ | $\Delta G_{\text{gas}}^{\text{rel}}$ | $\Delta E_{\text{gas}}^{\ddagger}$ | $\Delta G_{\text{gas}}^{\ddagger}$ | $\Delta E_{\text{sol}}^{\text{rel}}$ | $\Delta G_{\text{sol}}^{\text{rel}}$ | $\Delta E_{\text{sol}}^{\ddagger}$ | $\Delta G_{\text{sol}}^{\ddagger}$ |
|---------------|--------------------------------------|--------------------------------------|------------------------------------|------------------------------------|--------------------------------------|--------------------------------------|------------------------------------|------------------------------------|
| <b>E-1</b>    | 0                                    | 0                                    |                                    |                                    | 0                                    | 0                                    |                                    |                                    |
| <b>E-ts1</b>  | 16.1                                 | 15.7                                 | 16.1                               | 15.7                               | 24.2                                 | 17.6                                 | 24.2                               | 17.6                               |
| <b>E-int1</b> | -12.2                                | -9.6                                 |                                    |                                    | -1.3                                 | -4.7                                 |                                    |                                    |
| <b>E-ts2</b>  | -2.2                                 | 0.2                                  | 10.1                               | 9.8                                | 11.7                                 | 9.4                                  | 13.0                               | 14.1                               |
| <b>E-int2</b> | -9.7                                 | -6.9                                 |                                    |                                    | -5.7                                 | 0.6                                  |                                    |                                    |
| <b>E-ts3</b>  | 9.4                                  | 11.3                                 | 19.1                               | 18.1                               | 23.4                                 | 18.2                                 | 29.1                               | 17.7                               |
| <b>E-int3</b> | -34.9                                | -33.4                                |                                    |                                    | -18.7                                | -23.9                                |                                    |                                    |
| <b>E-int4</b> | -31.5                                | -29.3                                |                                    |                                    | -16.3                                | -21.2                                |                                    |                                    |
| <b>E-ts4</b>  | -17.6                                | -12.5                                | 13.9                               | 16.8                               | -2.2                                 | -4.3                                 | 14.1                               | 16.9                               |
| <b>E-2</b>    | -45.9                                | -45.6                                |                                    |                                    | -40.1                                | -43.4                                |                                    |                                    |
| <b>E-int5</b> | -7.1                                 | -6.3                                 |                                    |                                    | 5.7                                  | -0.9                                 |                                    |                                    |
| <b>E-ts5</b>  | 4.6                                  | 6.5                                  |                                    |                                    | 16.6                                 | 11.4                                 | 10.9                               | 12.3                               |
| <b>E-int6</b> | -31.9                                | -31.9                                |                                    |                                    | -26.2                                | -28.2                                |                                    |                                    |
| <b>E-ts6</b>  | -12.1                                | -9.0                                 | 19.8                               | 22.9                               | 2.1                                  | -2.8                                 | 28.3                               | 25.4                               |
| <b>E-int7</b> | -26.4                                | -23.1                                |                                    |                                    | -20.6                                | -19.1                                |                                    |                                    |
| <b>E-ts7</b>  | 0                                    | 3.9                                  | 26.4                               | 27.0                               | 12.0                                 | 6.9                                  | 32.5                               | 25.9                               |

**The Cartesian coordinates of the stationary points discussed in the text**

**A-1**

|   |            |            |           |
|---|------------|------------|-----------|
| C | 1.5961947  | -2.2867893 | 2.0203450 |
| C | 0.5668267  | -2.8928403 | 2.7675970 |
| C | -0.6287073 | -2.2361083 | 2.9316570 |

|    |            |            |            |
|----|------------|------------|------------|
| C  | -0.8409333 | -0.9604153 | 2.3566000  |
| C  | 0.2048647  | -0.3292583 | 1.6122920  |
| C  | 1.4194867  | -1.0413733 | 1.4684960  |
| C  | -2.1041773 | -0.3124303 | 2.4965970  |
| C  | -2.2974753 | 0.9410237  | 1.9591410  |
| C  | -1.2630113 | 1.5481277  | 1.2340930  |
| C  | -0.0309083 | 0.9578827  | 1.0285000  |
| C  | -0.7187973 | 0.9817117  | -1.9202840 |
| C  | 0.7229437  | 0.6928867  | -2.0501410 |
| N  | 1.5248327  | 1.0432567  | -1.0041100 |
| C  | 0.9499967  | 1.7457827  | 0.1760880  |
| C  | -1.8423013 | 1.4385947  | -2.1389100 |
| N  | 2.3783487  | 3.6675117  | 0.8659090  |
| C  | 2.0831657  | 2.3420067  | 1.0176540  |
| O  | 2.7290877  | 1.6556927  | 1.7933150  |
| O  | 1.1226327  | 0.1905017  | -3.0900680 |
| O  | -3.0772853 | -0.9777463 | 3.1420630  |
| H  | 0.3640367  | 2.5819207  | -0.2197870 |
| Au | -1.9109673 | -0.7942973 | -1.1224300 |
| C  | -3.1404693 | 2.0365247  | -2.3748440 |
| C  | 1.8033677  | 4.7858117  | 0.0850250  |
| C  | 0.4165397  | 5.1673127  | 0.5987150  |
| C  | 1.7833997  | 4.4874217  | -1.4134770 |
| C  | 2.7508097  | 5.9600997  | 0.3227400  |
| C  | 5.2048927  | -1.5701413 | 0.4253820  |



|   |            |            |            |
|---|------------|------------|------------|
| C | 4.9372687  | -2.7249003 | -0.3152750 |
| C | 4.0364577  | -2.6704643 | -1.3802120 |
| C | 3.4138737  | -1.4653553 | -1.6935940 |
| C | 3.6675867  | -0.3088993 | -0.9575470 |
| C | 4.5762547  | -0.3789383 | 0.1033990  |
| C | 2.9796067  | 0.9873407  | -1.2915540 |
| O | 5.5962177  | -3.8435863 | 0.0774260  |
| C | 5.3599767  | -5.0290643 | -0.6389820 |
| H | 2.5521627  | -2.7911343 | 1.8913700  |
| H | 0.7228827  | -3.8686213 | 3.2227900  |
| H | -1.4311633 | -2.6716853 | 3.5220920  |
| H | 2.2421347  | -0.5773873 | 0.9438280  |
| H | -3.2630503 | 1.4319217  | 2.0448910  |
| H | -1.4776453 | 2.5137717  | 0.7743710  |
| H | 3.1176367  | 3.9244277  | 1.5117300  |
| H | -3.9407933 | -0.6701463 | 2.7915000  |
| H | -3.0052213 | 3.0165587  | -2.8466860 |
| H | -3.7416913 | 1.4064597  | -3.0388700 |
| H | -3.6986053 | 2.1528317  | -1.4338880 |
| H | 0.4535337  | 5.3900927  | 1.6709720  |
| H | 0.0519937  | 6.0584087  | 0.0732580  |
| H | -0.3205563 | 4.3712247  | 0.4478210  |
| H | 2.7846777  | 4.2093557  | -1.7636630 |
| H | 1.4689547  | 5.3850877  | -1.9590860 |
| H | 1.0907947  | 3.6841867  | -1.6881720 |

|   |            |            |            |
|---|------------|------------|------------|
| H | 2.4004517  | 6.8447237  | -0.2194590 |
| H | 2.7980887  | 6.2172817  | 1.3885510  |
| H | 3.7630907  | 5.7235997  | -0.0270090 |
| H | 5.9076237  | -1.6380263 | 1.2518760  |
| H | 3.8184027  | -3.5529893 | -1.9747850 |
| H | 2.7160607  | -1.4168053 | -2.5274170 |
| H | 4.7595837  | 0.5073817  | 0.7090170  |
| H | 3.0758097  | 1.1923527  | -2.3641700 |
| H | 3.4617157  | 1.8121047  | -0.7581730 |
| H | 5.9743527  | -5.8025153 | -0.1733290 |
| H | 5.6485477  | -4.9316533 | -1.6956360 |
| H | 4.3039927  | -5.3326783 | -0.5880930 |
| P | -2.5942453 | -2.9648573 | -0.5867520 |
| C | -3.6142323 | -3.2143313 | 0.8924170  |
| H | -4.4955723 | -2.5668363 | 0.8377860  |
| H | -3.9137263 | -4.2686703 | 0.9398110  |
| H | -3.0559753 | -2.9426653 | 1.7929350  |
| C | -1.2071183 | -4.1354603 | -0.4174850 |
| H | -1.5805103 | -5.1530083 | -0.2502850 |
| H | -0.5932973 | -4.1115163 | -1.3232230 |
| H | -0.5879803 | -3.8268463 | 0.4337390  |
| C | -3.6255543 | -3.6070963 | -1.9459240 |
| H | -3.9598823 | -4.6278113 | -1.7248490 |
| H | -4.4924713 | -2.9452383 | -2.0443940 |
| H | -3.0607463 | -3.5989023 | -2.8830610 |

|   |            |            |            |
|---|------------|------------|------------|
| C | -7.0804483 | 0.2677477  | -0.1403010 |
| F | -7.5593273 | -0.9705143 | -0.1763750 |
| F | -7.2958643 | 0.8430367  | -1.3179190 |
| F | -7.7241553 | 0.9503387  | 0.7947300  |
| S | -5.2825893 | 0.2387837  | 0.2162740  |
| O | -5.2193473 | -0.4452583 | 1.5248340  |
| O | -4.8919483 | 1.6537537  | 0.2285650  |
| O | -4.7324083 | -0.5515813 | -0.9079770 |

Zero-point correction= 0.672491 (Hartree/Particle)

Thermal correction to Energy= 0.723396

Thermal correction to Enthalpy= 0.724340

Thermal correction to Gibbs Free Energy= 0.585155

Sum of electronic and zero-point Energies= -3051.436124

Sum of electronic and thermal Energies= -3051.385220

Sum of electronic and thermal Enthalpies= -3051.384276

Sum of electronic and thermal Free Energies= -3051.523460

### **A-ts1**

|   |            |            |           |
|---|------------|------------|-----------|
| C | 0.6902811  | -1.5513423 | 2.9223183 |
| C | -0.5540559 | -1.5992453 | 3.5774213 |
| C | -1.5812429 | -0.7994653 | 3.1412773 |
| C | -1.3934839 | 0.0765017  | 2.0485803 |
| C | -0.1183989 | 0.1800907  | 1.4244883 |
| C | 0.9068881  | -0.6829933 | 1.8781823 |
| C | -2.5075079 | 0.8098257  | 1.5224113 |
| C | -2.3438429 | 1.6493347  | 0.4242383 |

|    |            |            |            |
|----|------------|------------|------------|
| C  | -1.0856079 | 1.7981887  | -0.1271857 |
| C  | 0.0350781  | 1.0835237  | 0.3068993  |
| C  | -0.1094349 | -0.4885743 | -1.4381507 |
| C  | 1.3031041  | -0.3000333 | -1.7526777 |
| N  | 2.0698781  | 0.5083627  | -0.9736197 |
| C  | 1.3797011  | 1.5569947  | -0.2263897 |
| C  | -1.1625109 | -1.1481313 | -1.6995257 |
| N  | 2.2393721  | 3.4374607  | 1.1765853  |
| C  | 2.2671681  | 2.0986687  | 0.9020203  |
| O  | 2.9390131  | 1.3520877  | 1.5976183  |
| O  | 1.7073361  | -0.9091003 | -2.7353097 |
| O  | -3.6816709 | 0.6527367  | 2.1177083  |
| H  | 1.1609961  | 2.3890437  | -0.9142587 |
| Au | -2.7544369 | -1.5755113 | -0.3076107 |
| C  | -1.4643249 | -1.9324703 | -2.9530097 |
| C  | 1.9898211  | 4.6571817  | 0.3691463  |
| C  | 0.5086641  | 4.8654217  | 0.0722013  |
| C  | 2.8113591  | 4.6422937  | -0.9184007 |
| C  | 2.4693211  | 5.8097337  | 1.2491943  |
| C  | 5.5813961  | -1.9181113 | 0.2843303  |
| C  | 6.0230681  | -2.6818023 | -0.8011827 |
| C  | 5.6206941  | -2.3457293 | -2.0928617 |
| C  | 4.7796131  | -1.2516943 | -2.2832467 |
| C  | 4.3385791  | -0.4819983 | -1.2133307 |
| C  | 4.7509351  | -0.8313393 | 0.0785833  |

|   |            |            |            |
|---|------------|------------|------------|
| C | 3.4512381  | 0.7127787  | -1.4379537 |
| O | 6.8356251  | -3.7245523 | -0.4962147 |
| C | 7.2980381  | -4.5242653 | -1.5547927 |
| H | 1.4963201  | -2.2057273 | 3.2455033  |
| H | -0.7029189 | -2.2744363 | 4.4173833  |
| H | -2.5587559 | -0.8288873 | 3.6167873  |
| H | 1.8772811  | -0.6523543 | 1.3949323  |
| H | -3.2094339 | 2.1531697  | 0.0047353  |
| H | -0.9783169 | 2.4599007  | -0.9845687 |
| H | 2.8248281  | 3.5986827  | 1.9901033  |
| H | -4.4088079 | 0.9488727  | 1.5054513  |
| H | -0.6335959 | -1.8559273 | -3.6614847 |
| H | -1.6388839 | -2.9865903 | -2.7127977 |
| H | -2.3881539 | -1.5473823 | -3.3993207 |
| H | -0.0934709 | 4.7285327  | 0.9774673  |
| H | 0.3482181  | 5.8830647  | -0.3031507 |
| H | 0.1353411  | 4.1803867  | -0.6940697 |
| H | 3.8788411  | 4.5262827  | -0.6948547 |
| H | 2.6753741  | 5.5855177  | -1.4613927 |
| H | 2.5135351  | 3.8317507  | -1.5946297 |
| H | 2.3374351  | 6.7634247  | 0.7276213  |
| H | 1.8967821  | 5.8502077  | 2.1837833  |
| H | 3.5343181  | 5.7046967  | 1.4927333  |
| H | 5.9128621  | -2.2012223 | 1.2803673  |
| H | 5.9437891  | -2.9268623 | -2.9514867 |

|   |            |            |            |
|---|------------|------------|------------|
| H | 4.4443421  | -1.0048113 | -3.2888847 |
| H | 4.4075971  | -0.2358203 | 0.9234173  |
| H | 3.4313531  | 0.9673667  | -2.5074997 |
| H | 3.8449131  | 1.5801127  | -0.8954927 |
| H | 7.9256371  | -5.2992513 | -1.1095477 |
| H | 7.8995891  | -3.9453153 | -2.2707417 |
| H | 6.4691511  | -5.0028273 | -2.0964127 |
| P | -4.3236129 | -2.7892723 | 0.9867283  |
| C | -5.5041849 | -1.9256093 | 2.0743833  |
| H | -6.1254769 | -1.2679673 | 1.4579023  |
| H | -6.1325119 | -2.6672263 | 2.5828253  |
| H | -4.9622549 | -1.3233803 | 2.8086303  |
| C | -3.4786739 | -3.9644523 | 2.1073253  |
| H | -4.2080279 | -4.5578863 | 2.6721273  |
| H | -2.8427329 | -4.6325263 | 1.5176063  |
| H | -2.8374049 | -3.4089423 | 2.8001183  |
| C | -5.3753519 | -3.8577243 | -0.0510377 |
| H | -6.0427259 | -4.4603613 | 0.5769193  |
| H | -5.9615549 | -3.2097803 | -0.7094077 |
| H | -4.7455689 | -4.5187953 | -0.6547927 |
| C | -6.6698999 | 1.3799867  | -2.0603107 |
| F | -7.8510719 | 1.5036507  | -1.4711697 |
| F | -6.8360749 | 0.7908187  | -3.2369127 |
| F | -6.1579429 | 2.5893577  | -2.2541507 |
| S | -5.5409449 | 0.3776287  | -1.0211337 |

|   |            |            |            |
|---|------------|------------|------------|
| O | -5.4793319 | 1.1735777  | 0.2346633  |
| O | -4.2833409 | 0.3533067  | -1.7841557 |
| O | -6.2271319 | -0.9128243 | -0.8775907 |

Zero-point correction= 0.671080 (Hartree/Particle)

Thermal correction to Energy= 0.722328

Thermal correction to Enthalpy= 0.723273

Thermal correction to Gibbs Free Energy= 0.581994

Sum of electronic and zero-point Energies= -2328.039615

Sum of electronic and thermal Energies= -2327.988366

Sum of electronic and thermal Enthalpies= -2327.987422

Sum of electronic and thermal Free Energies= -2328.128700

#### **A-int1**

|   |            |            |            |
|---|------------|------------|------------|
| C | -1.4200468 | 1.5176128  | 2.7401484  |
| C | -0.3877228 | 1.2716958  | 3.6491104  |
| C | 0.7774872  | 0.6788028  | 3.2065724  |
| C | 0.9143762  | 0.3163658  | 1.8561434  |
| C | -0.1296258 | 0.5511808  | 0.9404384  |
| C | -1.2903898 | 1.1700458  | 1.4048664  |
| C | 2.1679382  | -0.2643062 | 1.4058624  |
| C | 2.3749312  | -0.4921312 | -0.0005376 |
| C | 1.3799692  | -0.2559942 | -0.8740026 |
| C | -0.0107578 | 0.1041768  | -0.4987666 |
| C | -0.6234578 | 1.1083528  | -1.4777106 |
| C | -1.9851578 | 0.6282398  | -1.8215606 |
| N | -2.1666158 | -0.5810682 | -1.1666826 |

|    |            |            |            |
|----|------------|------------|------------|
| C  | -0.9062428 | -1.1748472 | -0.8004446 |
| C  | -0.0158078 | 2.2557998  | -1.8471216 |
| N  | -0.2395568 | -3.2799272 | 0.3447094  |
| C  | -0.9933008 | -2.1365232 | 0.3771934  |
| O  | -1.6509518 | -1.8609252 | 1.3687034  |
| O  | -2.8492268 | 1.1457948  | -2.5091706 |
| O  | 3.0707402  | -0.5142602 | 2.2578204  |
| H  | -0.4489588 | -1.6853592 | -1.6641866 |
| Au | 1.7834412  | 2.8325878  | -0.9691286 |
| C  | -0.6471838 | 3.2102808  | -2.8117386 |
| C  | 0.2043022  | -4.1671622 | -0.7626266 |
| C  | 1.4467592  | -3.6376662 | -1.4722876 |
| C  | -0.9308018 | -4.4192852 | -1.7536926 |
| C  | 0.5688532  | -5.4865172 | -0.0853436 |
| C  | -5.6228128 | 0.0895228  | 1.4397474  |
| C  | -6.6746398 | 0.6521548  | 0.7087844  |
| C  | -6.6660078 | 0.5804508  | -0.6830156 |
| C  | -5.6049278 | -0.0524812 | -1.3276016 |
| C  | -4.5611388 | -0.6252872 | -0.6125876 |
| C  | -4.5804708 | -0.5425262 | 0.7853664  |
| C  | -3.4196338 | -1.3080792 | -1.3203326 |
| O  | -7.6506458 | 1.2467528  | 1.4423234  |
| C  | -8.7229308 | 1.8311978  | 0.7485854  |
| H  | -2.3417858 | 1.9862278  | 3.0778764  |
| H  | -0.4996598 | 1.5485098  | 4.6940774  |



|   |            |            |            |
|---|------------|------------|------------|
| H | 1.6060502  | 0.4829718  | 3.8821454  |
| H | -2.1122148 | 1.3636168  | 0.7211004  |
| H | 3.3575232  | -0.8024362 | -0.3375966 |
| H | 1.5552332  | -0.3973512 | -1.9410696 |
| H | -0.3686378 | -3.7648152 | 1.2276414  |
| H | 4.0779422  | -0.9896182 | 1.8736324  |
| H | -1.6135888 | 2.8689768  | -3.1934456 |
| H | -0.7802808 | 4.1866758  | -2.3261566 |
| H | 0.0363172  | 3.3922078  | -3.6517286 |
| H | 2.2479612  | -3.4248112 | -0.7550776 |
| H | 1.8103352  | -4.3908612 | -2.1815186 |
| H | 1.2497002  | -2.7248972 | -2.0443296 |
| H | -1.8113698 | -4.8191942 | -1.2362656 |
| H | -0.6147218 | -5.1519882 | -2.5060236 |
| H | -1.2320148 | -3.5112202 | -2.2895006 |
| H | 0.9176062  | -6.2100402 | -0.8296566 |
| H | 1.3719052  | -5.3399202 | 0.6472104  |
| H | -0.2997738 | -5.9209952 | 0.4255594  |
| H | -5.6557778 | 0.1596498  | 2.5245444  |
| H | -7.4636398 | 1.0211378  | -1.2737746 |
| H | -5.5801628 | -0.0789992 | -2.4157646 |
| H | -3.7569948 | -0.9743712 | 1.3534024  |
| H | -3.6534888 | -1.4127792 | -2.3906376 |
| H | -3.2659908 | -2.3153162 | -0.9112516 |
| H | -9.3938308 | 2.2476618  | 1.5031774  |

|   |            |            |            |
|---|------------|------------|------------|
| H | -9.2741438 | 1.0907088  | 0.1504484  |
| H | -8.3866498 | 2.6403668  | 0.0838434  |
| P | 3.7198102  | 3.6397538  | 0.2022834  |
| C | 4.0040822  | 2.8466348  | 1.8234124  |
| H | 4.3227802  | 1.8117858  | 1.6591064  |
| H | 4.7876142  | 3.3774348  | 2.3775154  |
| H | 3.0742712  | 2.8532308  | 2.4030244  |
| C | 3.5224012  | 5.4099028  | 0.6312404  |
| H | 4.3842272  | 5.7695698  | 1.2064084  |
| H | 3.4259152  | 6.0017238  | -0.2845146 |
| H | 2.6103732  | 5.5418588  | 1.2221304  |
| C | 5.3493672  | 3.5797158  | -0.6163246 |
| H | 6.1042032  | 4.0680538  | 0.0117604  |
| H | 5.6309662  | 2.5331598  | -0.7666186 |
| H | 5.2951762  | 4.0881668  | -1.5837176 |
| C | 6.2635862  | -1.9230682 | -0.7213326 |
| F | 6.8099122  | -3.0483142 | -0.2981836 |
| F | 7.0334192  | -1.3793842 | -1.6492806 |
| F | 5.0742852  | -2.1970682 | -1.2588596 |
| S | 6.0693862  | -0.7431362 | 0.6708014  |
| O | 5.1171802  | -1.5326032 | 1.5580844  |
| O | 5.3918702  | 0.4167828  | 0.0831684  |
| O | 7.3935432  | -0.5799652 | 1.2311984  |

Zero-point correction= 0.670874 (Hartree/Particle)

Thermal correction to Energy= 0.720883

Thermal correction to Enthalpy= 0.721827

Thermal correction to Gibbs Free Energy= 0.582559

Sum of electronic and zero-point Energies= -3051.444926

Sum of electronic and thermal Energies= -3051.394917

Sum of electronic and thermal Enthalpies= -3051.393973

Sum of electronic and thermal Free Energies= -3051.533241

**A-ts2**

|   |            |            |            |
|---|------------|------------|------------|
| C | 2.2515415  | -2.0631820 | 2.3999172  |
| C | 1.2704865  | -2.1354380 | 3.3884672  |
| C | 0.0490005  | -1.5173860 | 3.1850222  |
| C | -0.1990105 | -0.8171350 | 1.9961742  |
| C | 0.7826125  | -0.7471350 | 0.9989382  |
| C | 2.0079515  | -1.3776390 | 1.2181012  |
| C | -1.5066035 | -0.2110880 | 1.7656912  |
| C | -1.8054695 | 0.4212570  | 0.5692622  |
| C | -0.8177415 | 0.6321300  | -0.4017778 |
| C | 0.5842065  | 0.0664880  | -0.2682648 |
| C | 0.9301105  | -0.7162410 | -1.5432618 |
| C | 2.1349955  | -0.1072220 | -2.1462098 |
| N | 2.4158165  | 1.0732460  | -1.4528178 |
| C | 1.6481575  | 1.2040040  | -0.2361588 |
| C | 0.2081765  | -1.7567010 | -2.0197348 |
| N | -0.3752325 | 2.6235250  | -0.3673028 |
| C | 1.0538425  | 2.5908650  | -0.1254778 |
| O | 1.7068435  | 3.5628180  | 0.1552782  |

|    |            |            |            |
|----|------------|------------|------------|
| O  | 2.8276005  | -0.4905710 | -3.0741528 |
| O  | -2.3773295 | -0.3761380 | 2.7231112  |
| Au | -1.5829245 | -2.4001550 | -1.1599908 |
| C  | 0.6011085  | -2.4850090 | -3.2687638 |
| C  | 5.5142945  | 0.9721680  | 1.8033262  |
| C  | 6.0362075  | -0.3069630 | 1.5913952  |
| C  | 5.8691935  | -0.9278940 | 0.3509222  |
| C  | 5.1740945  | -0.2676240 | -0.6591548 |
| C  | 4.6431505  | 1.0062810  | -0.4580878 |
| C  | 4.8288545  | 1.6175120  | 0.7869032  |
| C  | 3.7675235  | 1.6353770  | -1.5066598 |
| O  | 6.6839535  | -0.8612010 | 2.6442922  |
| C  | 7.2409865  | -2.1410120 | 2.4738202  |
| H  | 3.2177745  | -2.5404820 | 2.5488832  |
| H  | 1.4621435  | -2.6724690 | 4.3136592  |
| H  | -0.7331125 | -1.5598720 | 3.9374582  |
| H  | 2.7889685  | -1.3247740 | 0.4587112  |
| H  | -2.8309075 | 0.7231560  | 0.3723742  |
| H  | -3.3078515 | -0.0937510 | 2.4378892  |
| H  | 1.4948555  | -2.0878580 | -3.7562888 |
| H  | 0.7681515  | -3.5433470 | -3.0260048 |
| H  | -0.2375155 | -2.4816820 | -3.9778358 |
| H  | 5.6616065  | 1.4338790  | 2.7762282  |
| H  | 6.2770265  | -1.9163080 | 0.1599392  |
| H  | 5.0251615  | -0.7562110 | -1.6215858 |

|   |            |            |            |
|---|------------|------------|------------|
| H | 4.4120835  | 2.6106800  | 0.9588822  |
| H | 4.1306455  | 1.4258570  | -2.5181308 |
| H | 3.7048455  | 2.7228350  | -1.3750268 |
| H | 7.7161165  | -2.4026100 | 3.4213202  |
| H | 7.9991045  | -2.1524250 | 1.6777992  |
| H | 6.4724425  | -2.8926720 | 2.2397792  |
| P | -3.7308785 | -3.1096670 | -0.3626728 |
| C | -3.9249175 | -3.2836720 | 1.4432322  |
| H | -3.8908845 | -2.2929450 | 1.9047752  |
| H | -4.8956045 | -3.7390470 | 1.6732362  |
| H | -3.1188145 | -3.9059250 | 1.8448002  |
| C | -4.2189265 | -4.7548510 | -1.0019058 |
| H | -5.2278155 | -5.0154800 | -0.6600008 |
| H | -4.1999855 | -4.7438020 | -2.0962838 |
| H | -3.5107925 | -5.5125460 | -0.6519518 |
| C | -5.0964225 | -2.0214470 | -0.8870208 |
| H | -6.0440095 | -2.3355570 | -0.4337568 |
| H | -4.8950915 | -0.9978900 | -0.5575208 |
| H | -5.1768915 | -2.0497190 | -1.9786708 |
| C | -5.3646835 | 2.1411330  | 0.6160352  |
| F | -4.2805565 | 2.7563720  | 1.1129662  |
| F | -6.3268315 | 3.0355240  | 0.4799462  |
| F | -5.0350495 | 1.6826770  | -0.5986598 |
| S | -5.8739025 | 0.7582900  | 1.7129232  |
| O | -4.6375995 | -0.0950490 | 1.6391642  |

|   |            |           |            |
|---|------------|-----------|------------|
| O | -7.0049445 | 0.1603080 | 1.0174042  |
| O | -6.0819755 | 1.3903370 | 3.0064712  |
| H | 2.3131805  | 1.0989130 | 0.6376352  |
| H | -1.1519285 | 0.7402280 | -1.4304918 |
| H | -0.8459715 | 2.9643920 | 0.4764332  |
| C | -0.8421725 | 3.4672250 | -1.5375548 |
| C | -0.0593215 | 3.0571000 | -2.7755228 |
| C | -2.3308715 | 3.1954130 | -1.7069848 |
| C | -0.6268655 | 4.9450580 | -1.2259778 |
| H | 1.0123315  | 3.2695590 | -2.6725188 |
| H | -0.1751045 | 1.9912850 | -3.0070258 |
| H | -0.4293035 | 3.6270280 | -3.6347118 |
| H | -2.8825665 | 3.3841320 | -0.7784248 |
| H | -2.7332805 | 3.8638930 | -2.4763528 |
| H | -2.5426125 | 2.1676820 | -2.0209888 |
| H | -0.9952095 | 5.5463430 | -2.0656798 |
| H | -1.1896865 | 5.2422920 | -0.3319198 |
| H | 0.4280275  | 5.1805300 | -1.0632808 |

Zero-point correction= 0.673217 (Hartree/Particle)

Thermal correction to Energy= 0.722141

Thermal correction to Enthalpy= 0.723085

Thermal correction to Gibbs Free Energy= 0.588734

Sum of electronic and zero-point Energies= -3051.415542

Sum of electronic and thermal Energies= -3051.366618

Sum of electronic and thermal Enthalpies= -3051.365674

Sum of electronic and thermal Free Energies= -3051.500025

**A-int2**

|    |            |            |            |
|----|------------|------------|------------|
| C  | -2.4669229 | -2.1103482 | -2.2273314 |
| C  | -1.5285389 | -2.2657352 | -3.2432304 |
| C  | -0.2930109 | -1.6446212 | -3.1364754 |
| C  | 0.0159921  | -0.8657532 | -2.0169974 |
| C  | -0.9160739 | -0.7293952 | -0.9811864 |
| C  | -2.1580339 | -1.3517722 | -1.1053494 |
| C  | 1.3201291  | -0.1981572 | -1.9249124 |
| C  | 1.6640341  | 0.5483378  | -0.8505334 |
| C  | 0.7743921  | 0.7347258  | 0.3123316  |
| C  | -0.6583159 | 0.1367058  | 0.2436056  |
| C  | -1.0285329 | -0.5915302 | 1.5415126  |
| C  | -2.2347909 | 0.0507908  | 2.1033526  |
| N  | -2.4652549 | 1.2328688  | 1.3839466  |
| C  | -1.6353219 | 1.3336558  | 0.2079156  |
| C  | -0.3466309 | -1.6423362 | 2.0514476  |
| N  | 0.6145471  | 2.2711988  | 0.5424206  |
| C  | -0.8404929 | 2.6046128  | 0.2700076  |
| O  | -1.1981219 | 3.7303398  | 0.1131596  |
| O  | -2.9653909 | -0.2922522 | 3.0168056  |
| O  | 2.1195141  | -0.4098732 | -2.9648824 |
| Au | 1.4249951  | -2.3455652 | 1.1910836  |
| C  | -0.7702969 | -2.3293642 | 3.3129946  |
| C  | -5.4958119 | 1.2537228  | -1.9488364 |

|   |            |            |            |
|---|------------|------------|------------|
| C | -6.0871599 | 0.0051008  | -1.7368074 |
| C | -5.9767529 | -0.6121152 | -0.4878444 |
| C | -5.2675439 | 0.0193088  | 0.5296486  |
| C | -4.6667479 | 1.2618618  | 0.3286146  |
| C | -4.7975269 | 1.8707938  | -0.9239704 |
| C | -3.7896569 | 1.8575018  | 1.3930636  |
| O | -6.7445969 | -0.5215672 | -2.7959654 |
| C | -7.3591209 | -1.7764882 | -2.6334784 |
| H | -3.4438639 | -2.5834502 | -2.3019384 |
| H | -1.7616479 | -2.8647592 | -4.1199634 |
| H | 0.4523701  | -1.7421232 | -3.9203854 |
| H | -2.9022449 | -1.2427072 | -0.3160614 |
| H | 2.6754571  | 0.9499648  | -0.7864004 |
| H | 3.0400631  | -0.0933402 | -2.7609254 |
| H | -1.6550799 | -1.8941932 | 3.7849466  |
| H | -0.9714929 | -3.3867252 | 3.0927256  |
| H | 0.0631181  | -2.3396562 | 4.0281946  |
| H | -5.6019489 | 1.7144118  | -2.9274204 |
| H | -6.4383979 | -1.5766792 | -0.2976244 |
| H | -5.1636269 | -0.4674042 | 1.4990626  |
| H | -4.3381689 | 2.8459418  | -1.0943654 |
| H | -4.1899449 | 1.6793138  | 2.3965806  |
| H | -3.6712979 | 2.9399658  | 1.2544636  |
| H | -7.8284229 | -2.0185792 | -3.5889274 |
| H | -8.1310329 | -1.7533792 | -1.8511494 |



|   |            |            |            |
|---|------------|------------|------------|
| H | -6.6269379 | -2.5590692 | -2.3863024 |
| P | 3.5835451  | -2.9259342 | 0.3229326  |
| C | 3.7281011  | -3.1085962 | -1.4855014 |
| H | 3.2767461  | -2.2494762 | -1.9887584 |
| H | 4.7864001  | -3.1553802 | -1.7696774 |
| H | 3.2132091  | -4.0227362 | -1.7987414 |
| C | 4.3409401  | -4.4636522 | 0.9653816  |
| H | 5.3556291  | -4.5800332 | 0.5663486  |
| H | 4.3859061  | -4.4226942 | 2.0581806  |
| H | 3.7366371  | -5.3285182 | 0.6747766  |
| C | 4.7742641  | -1.6280572 | 0.7855726  |
| H | 5.7421751  | -1.7616712 | 0.2867566  |
| H | 4.3765141  | -0.6636442 | 0.4594406  |
| H | 4.8964591  | -1.6286072 | 1.8742546  |
| C | 5.5858581  | 2.0299428  | -0.7436474 |
| F | 4.5309281  | 2.7983148  | -1.0665484 |
| F | 6.6570761  | 2.8016298  | -0.6863344 |
| F | 5.3495001  | 1.5481178  | 0.4848426  |
| S | 5.7938491  | 0.6675458  | -1.9621734 |
| O | 4.4427191  | 0.0341788  | -1.8844364 |
| O | 6.8448761  | -0.1584832 | -1.3735434 |
| O | 6.0677861  | 1.3638518  | -3.2107794 |
| H | -2.2456299 | 1.3625568  | -0.7103974 |
| H | 1.2454371  | 0.3729428  | 1.2309896  |
| H | 1.1459761  | 2.7294928  | -0.2110644 |

|   |            |           |           |
|---|------------|-----------|-----------|
| C | 1.2108231  | 2.8378058 | 1.8702236 |
| C | 0.4321541  | 2.2615818 | 3.0366056 |
| C | 2.6786391  | 2.4368138 | 1.8894126 |
| C | 1.1039231  | 4.3552558 | 1.8281476 |
| H | -0.6279999 | 2.5422318 | 2.9980026 |
| H | 0.4973101  | 1.1684678 | 3.0897746 |
| H | 0.8518751  | 2.6682448 | 3.9629566 |
| H | 3.2185531  | 2.8230778 | 1.0167906 |
| H | 3.1393641  | 2.8742738 | 2.7818116 |
| H | 2.8401881  | 1.3543418 | 1.9397026 |
| H | 1.6345221  | 4.7522138 | 2.7003496 |
| H | 1.5835511  | 4.7711598 | 0.9335696 |
| H | 0.0723421  | 4.7112558 | 1.8661616 |

Zero-point correction= 0.675880 (Hartree/Particle)

Thermal correction to Energy= 0.724747

Thermal correction to Enthalpy= 0.725691

Thermal correction to Gibbs Free Energy= 0.592285

Sum of electronic and zero-point Energies= -3051.423936

Sum of electronic and thermal Energies= -3051.375069

Sum of electronic and thermal Enthalpies= -3051.374125

Sum of electronic and thermal Free Energies= -3051.507531

### **A-ts3**

|   |           |            |           |
|---|-----------|------------|-----------|
| C | 2.3974291 | -1.9118245 | 2.3833147 |
| C | 1.4658771 | -1.8718915 | 3.4204887 |
| C | 0.2612981 | -1.2204095 | 3.2266607 |

|    |            |            |            |
|----|------------|------------|------------|
| C  | -0.0182379 | -0.5939445 | 2.0025017  |
| C  | 0.9094171  | -0.6470155 | 0.9513567  |
| C  | 2.1167941  | -1.3139335 | 1.1628397  |
| C  | -1.3076399 | 0.0568065  | 1.8066987  |
| C  | -1.6264889 | 0.7135475  | 0.6202657  |
| C  | -0.6889799 | 0.7053845  | -0.5603983 |
| C  | 0.7161521  | 0.0922925  | -0.3593083 |
| C  | 1.1295981  | -0.7417625 | -1.5715553 |
| C  | 2.3507041  | -0.1365895 | -2.1494943 |
| N  | 2.5634361  | 1.0852835  | -1.5101313 |
| C  | 1.6976521  | 1.2866765  | -0.3729253 |
| C  | 0.4640771  | -1.8364855 | -2.0007673 |
| N  | -0.5081159 | 2.2221045  | -0.6899203 |
| C  | 0.8971591  | 2.5512945  | -0.5615273 |
| O  | 1.3456001  | 3.6657635  | -0.6004823 |
| O  | 3.1008871  | -0.5567885 | -3.0151563 |
| O  | -2.1312479 | -0.0088795 | 2.8133737  |
| Au | -1.3276449 | -2.4553835 | -1.1188533 |
| C  | 0.9194401  | -2.6328645 | -3.1843643 |
| C  | 5.5356911  | 1.2925965  | 1.8702017  |
| C  | 6.1139771  | 0.0264845  | 1.7443177  |
| C  | 6.0109041  | -0.6660775 | 0.5353607  |
| C  | 5.3248511  | -0.0892115 | -0.5297503 |
| C  | 4.7379691  | 1.1711265  | -0.4156043 |
| C  | 4.8584501  | 1.8536245  | 0.7992057  |

|   |            |            |            |
|---|------------|------------|------------|
| C | 3.8858621  | 1.7098505  | -1.5314733 |
| O | 6.7512621  | -0.4419945 | 2.8445637  |
| C | 7.3702331  | -1.7014815 | 2.7602307  |
| H | 3.3530031  | -2.4126195 | 2.5235667  |
| H | 1.6831061  | -2.3459145 | 4.3738477  |
| H | -0.4842039 | -1.1769945 | 4.0152297  |
| H | 2.8523211  | -1.3598205 | 0.3608557  |
| H | -2.6912099 | 0.8542615  | 0.4197847  |
| H | -3.0809529 | 0.2052395  | 2.5267457  |
| H | 1.8174341  | -2.2356975 | -3.6652503 |
| H | 1.1133671  | -3.6672895 | -2.8690673 |
| H | 0.1079431  | -2.7028745 | -3.9210363 |
| H | 5.6356511  | 1.8125995  | 2.8194427  |
| H | 6.4634911  | -1.6455535 | 0.4103797  |
| H | 5.2286991  | -0.6326805 | -1.4693423 |
| H | 4.4078251  | 2.8420685  | 0.9017877  |
| H | 4.3099931  | 1.4753315  | -2.5132583 |
| H | 3.7607781  | 2.7967165  | -1.4546963 |
| H | 7.8295931  | -1.8884775 | 3.7328787  |
| H | 8.1505621  | -1.7211055 | 1.9861067  |
| H | 6.6438441  | -2.5004335 | 2.5491407  |
| P | -3.5125349 | -2.9855055 | -0.2775583 |
| C | -3.7327389 | -3.0423535 | 1.5331047  |
| H | -3.3361739 | -2.1315505 | 1.9881787  |
| H | -4.8007029 | -3.1028345 | 1.7757107  |

|   |            |            |            |
|---|------------|------------|------------|
| H | -3.2042479 | -3.9135515 | 1.9335517  |
| C | -4.1995629 | -4.5892125 | -0.8315913 |
| H | -5.2269899 | -4.7070185 | -0.4670153 |
| H | -4.1977609 | -4.6311885 | -1.9252853 |
| H | -3.5840499 | -5.4106465 | -0.4520413 |
| C | -4.7240049 | -1.7688885 | -0.8898123 |
| H | -5.7084849 | -1.9199325 | -0.4306903 |
| H | -4.3913429 | -0.7633225 | -0.6160983 |
| H | -4.7878509 | -1.8526285 | -1.9801053 |
| C | -5.8140479 | 1.9000325  | 0.6421057  |
| F | -4.8870039 | 2.8089665  | 0.9640437  |
| F | -6.9940309 | 2.4929635  | 0.6076807  |
| F | -5.5253439 | 1.4532735  | -0.5860733 |
| S | -5.7907689 | 0.5211355  | 1.8528237  |
| O | -4.3699749 | 0.0609425  | 1.6754837  |
| O | -6.7553049 | -0.4395745 | 1.3279707  |
| O | -6.0517939 | 1.1571165  | 3.1343957  |
| H | 2.2863341  | 1.3759825  | 0.5550037  |
| H | -1.1331629 | 0.3042105  | -1.4749963 |
| H | -1.1333039 | 2.0946885  | 0.4351717  |
| C | -1.3066559 | 2.9534105  | -1.7723353 |
| C | -0.6311679 | 2.6636625  | -3.1061243 |
| C | -2.7445469 | 2.4489315  | -1.7689613 |
| C | -1.3247719 | 4.4444075  | -1.4577273 |
| H | 0.3943131  | 3.0495145  | -3.1326163 |

|   |            |           |            |
|---|------------|-----------|------------|
| H | -0.6040939 | 1.5879125 | -3.3225363 |
| H | -1.1934059 | 3.1516275 | -3.9103493 |
| H | -3.2587359 | 2.6840555 | -0.8315233 |
| H | -3.2820629 | 2.9667465 | -2.5708743 |
| H | -2.8395969 | 1.3744665 | -1.9654523 |
| H | -1.9908789 | 4.9381505 | -2.1744413 |
| H | -1.7244189 | 4.6225415 | -0.4522373 |
| H | -0.3367419 | 4.9004165 | -1.5255663 |

Zero-point correction= 0.670715 (Hartree/Particle)

Thermal correction to Energy= 0.718973

Thermal correction to Enthalpy= 0.719918

Thermal correction to Gibbs Free Energy= 0.587889

Sum of electronic and zero-point Energies= -3051.397837

Sum of electronic and thermal Energies= -3051.349579

Sum of electronic and thermal Enthalpies= -3051.348635

Sum of electronic and thermal Free Energies= -3051.480663

### **A-int3**

|   |            |            |           |
|---|------------|------------|-----------|
| C | 2.6296720  | -1.9626541 | 2.1902791 |
| C | 1.6402980  | -2.3168371 | 3.1111231 |
| C | 0.3819480  | -1.7587571 | 2.9940811 |
| C | 0.1147040  | -0.8399191 | 1.9682511 |
| C | 1.0876710  | -0.5181841 | 1.0063891 |
| C | 2.3543330  | -1.0929421 | 1.1453691 |
| C | -1.1700180 | -0.1520031 | 1.9408691 |
| C | -1.1794920 | 1.1614209  | 1.2215811 |

|    |            |            |            |
|----|------------|------------|------------|
| C  | -0.6073960 | 1.0167189  | -0.1879549 |
| C  | 0.7805660  | 0.3474399  | -0.1997069 |
| C  | 1.0411360  | -0.4561051 | -1.4854579 |
| C  | 2.3692980  | -0.0177951 | -2.0094869 |
| N  | 2.7325770  | 1.1062979  | -1.3035679 |
| C  | 1.7462980  | 1.5331629  | -0.3456969 |
| C  | 0.2511640  | -1.4237741 | -1.9891689 |
| N  | -0.4265840 | 2.3139919  | -0.8314229 |
| C  | 0.8980210  | 2.6526169  | -0.9514179 |
| O  | 1.3733290  | 3.6297629  | -1.4995039 |
| O  | 3.0795140  | -0.5255861 | -2.8661279 |
| O  | -2.1671950 | -0.5937381 | 2.5292381  |
| Au | -1.5748560 | -2.0476201 | -1.1856009 |
| C  | 0.6052700  | -2.1578501 | -3.2510439 |
| C  | 5.8663110  | 1.1901679  | 1.9036101  |
| C  | 6.4105520  | -0.0834851 | 1.7210451  |
| C  | 6.2358550  | -0.7440731 | 0.5026361  |
| C  | 5.5125070  | -0.1262811 | -0.5143669 |
| C  | 4.9554710  | 1.1406109  | -0.3416359 |
| C  | 5.1491020  | 1.7902889  | 0.8805181  |
| C  | 4.0506690  | 1.7095999  | -1.4013779 |
| O  | 7.0905770  | -0.5922361 | 2.7796381  |
| C  | 7.6700550  | -1.8638781 | 2.6360751  |
| H  | 3.6322190  | -2.3767121 | 2.2788951  |
| H  | 1.8621090  | -3.0116731 | 3.9167611  |

|   |            |            |            |
|---|------------|------------|------------|
| H | -0.4106590 | -1.9846161 | 3.7034831  |
| H | 3.1400930  | -0.8635581 | 0.4274721  |
| H | -2.1865030 | 1.5881299  | 1.2090301  |
| H | -3.4442330 | -0.0875341 | 1.9667311  |
| H | 1.5549170  | -1.8374601 | -3.6875389 |
| H | 0.6550410  | -3.2368571 | -3.0503169 |
| H | -0.1975380 | -2.0324181 | -3.9906579 |
| H | 6.0243360  | 1.6853769  | 2.8583661  |
| H | 6.6601310  | -1.7297171 | 0.3333701  |
| H | 5.3512810  | -0.6455631 | -1.4588989 |
| H | 4.7299920  | 2.7859029  | 1.0292751  |
| H | 4.4222730  | 1.4811269  | -2.4064529 |
| H | 3.9382960  | 2.7966729  | -1.3121419 |
| H | 8.1725490  | -2.0864111 | 3.5797141  |
| H | 8.4099490  | -1.8863871 | 1.8229771  |
| H | 6.9131320  | -2.6393131 | 2.4439031  |
| P | -3.7539070 | -2.8551131 | -0.5649519 |
| C | -4.1495470 | -3.1836151 | 1.1905071  |
| H | -3.8450570 | -2.3457001 | 1.8208671  |
| H | -5.2238030 | -3.3643911 | 1.3141861  |
| H | -3.5909200 | -4.0699651 | 1.5091321  |
| C | -4.1211750 | -4.4702001 | -1.3498549 |
| H | -5.1427780 | -4.7920481 | -1.1140779 |
| H | -4.0116470 | -4.3812531 | -2.4353919 |
| H | -3.4127630 | -5.2246431 | -0.9936749 |



|   |            |            |            |
|---|------------|------------|------------|
| C | -5.0987460 | -1.7994971 | -1.2127959 |
| H | -6.0793740 | -2.1640141 | -0.8859149 |
| H | -4.9704280 | -0.7710881 | -0.8669709 |
| H | -5.0430140 | -1.8134331 | -2.3067309 |
| C | -5.8340890 | 2.0868519  | 1.2736561  |
| F | -4.8424340 | 2.8801029  | 1.6519221  |
| F | -6.9812990 | 2.5790319  | 1.6975261  |
| F | -5.8463050 | 1.9959879  | -0.0466769 |
| S | -5.5930790 | 0.4172659  | 1.9998791  |
| O | -4.2193860 | 0.0952619  | 1.3050541  |
| O | -6.6267670 | -0.4228791 | 1.4376481  |
| O | -5.4191620 | 0.5783979  | 3.4260781  |
| H | 2.2173740  | 1.8465639  | 0.5998271  |
| H | -1.2971060 | 0.4007059  | -0.7792009 |
| C | -1.4900320 | 2.9071139  | -1.6974769 |
| C | -1.2857380 | 2.3687289  | -3.1119089 |
| C | -2.8788590 | 2.5210539  | -1.1915999 |
| C | -1.4031310 | 4.4316079  | -1.6706849 |
| H | -0.2942610 | 2.6448429  | -3.4878839 |
| H | -1.3699510 | 1.2735409  | -3.1288319 |
| H | -2.0401190 | 2.7823209  | -3.7925009 |
| H | -3.0836610 | 2.9543749  | -0.2052649 |
| H | -3.6206210 | 2.9349259  | -1.8844479 |
| H | -3.0548530 | 1.4377889  | -1.1468589 |
| H | -2.2464760 | 4.8451329  | -2.2372119 |

|   |            |           |            |
|---|------------|-----------|------------|
| H | -1.4725540 | 4.7979359 | -0.6391389 |
| H | -0.4688310 | 4.7934729 | -2.1007079 |
| H | -0.5342410 | 1.8474759 | 1.7933401  |

Zero-point correction= 0.676072 (Hartree/Particle)

Thermal correction to Energy= 0.724402

Thermal correction to Enthalpy= 0.725346

Thermal correction to Gibbs Free Energy= 0.593635

Sum of electronic and zero-point Energies= -3051.469194

Sum of electronic and thermal Energies= -3051.420863

Sum of electronic and thermal Enthalpies= -3051.419919

Sum of electronic and thermal Free Energies= -3051.551631

#### **A-int4**

|   |            |            |            |
|---|------------|------------|------------|
| C | 0.8638585  | -2.5309990 | 1.7247855  |
| C | -0.0820825 | -2.4093160 | 2.7439225  |
| C | -0.7505195 | -1.2079380 | 2.9066625  |
| C | -0.4923845 | -0.1325000 | 2.0475625  |
| C | 0.4125955  | -0.2707300 | 0.9817895  |
| C | 1.1024935  | -1.4789830 | 0.8513855  |
| C | -1.1126185 | 1.1771260  | 2.3275525  |
| C | -0.3995245 | 2.3495940  | 1.7085395  |
| C | -0.1601105 | 2.1224950  | 0.2162915  |
| C | 0.5888695  | 0.8031510  | -0.0731155 |
| C | 0.2458895  | 0.2424070  | -1.4631965 |
| C | 1.5322865  | 0.0626920  | -2.2032045 |
| N | 2.5231325  | 0.6354990  | -1.4423335 |

|    |            |            |            |
|----|------------|------------|------------|
| C  | 2.0531825  | 1.2526670  | -0.2259945 |
| C  | -0.9866095 | -0.0986250 | -1.8909985 |
| N  | 0.6881725  | 3.1499630  | -0.3776855 |
| C  | 1.9993895  | 2.7649920  | -0.4246015 |
| O  | 2.9748795  | 3.4601790  | -0.6522305 |
| O  | 1.7452275  | -0.5214190 | -3.2560435 |
| O  | -2.0913105 | 1.3181330  | 3.0475335  |
| Au | -2.6712405 | 0.0764570  | -0.6501825 |
| C  | -1.2452715 | -0.6053830 | -3.2810165 |
| C  | 5.3814135  | -1.6783240 | 1.1194365  |
| C  | 5.0621495  | -2.9694650 | 0.6917315  |
| C  | 4.4367685  | -3.1559900 | -0.5435255 |
| C  | 4.1273145  | -2.0489910 | -1.3291325 |
| C  | 4.4300575  | -0.7541490 | -0.9083045 |
| C  | 5.0673485  | -0.5873150 | 0.3242645  |
| C  | 3.9383695  | 0.4243140  | -1.7044615 |
| O  | 5.3997315  | -3.9727020 | 1.5400795  |
| C  | 5.0901155  | -5.2883990 | 1.1553075  |
| H  | 1.4059245  | -3.4650380 | 1.5931915  |
| H  | -0.2806625 | -3.2452020 | 3.4095275  |
| H  | -1.4624335 | -1.0591850 | 3.7159705  |
| H  | 1.8173595  | -1.6137520 | 0.0393105  |
| H  | -0.9823025 | 3.2573540  | 1.8998815  |
| H  | -1.3865535 | -2.0021790 | -0.7774025 |
| H  | -0.3412685 | -0.6699160 | -3.8919615 |

|   |            |            |            |
|---|------------|------------|------------|
| H | -1.7163875 | -1.5970210 | -3.2431165 |
| H | -1.9777275 | 0.0454180  | -3.7771755 |
| H | 5.8748315  | -1.5619680 | 2.0810625  |
| H | 4.1887805  | -4.1509200 | -0.9019415 |
| H | 3.6171805  | -2.1863610 | -2.2824975 |
| H | 5.3182415  | 0.4179600  | 0.6641985  |
| H | 4.0304345  | 0.2479790  | -2.7817255 |
| H | 4.4752145  | 1.3468550  | -1.4522875 |
| H | 5.4302985  | -5.9381800 | 1.9642925  |
| H | 5.6050105  | -5.5744770 | 0.2267705  |
| H | 4.0079095  | -5.4291110 | 1.0154075  |
| P | -4.5967135 | 0.2752920  | 0.7669725  |
| C | -4.5664985 | -0.6129930 | 2.3576445  |
| H | -3.7551545 | -0.1959470 | 2.9636655  |
| H | -5.5237225 | -0.4790270 | 2.8762375  |
| H | -4.3813795 | -1.6750630 | 2.1761035  |
| C | -6.1320535 | -0.3142050 | -0.0317935 |
| H | -6.9959725 | -0.1814490 | 0.6303305  |
| H | -6.3007165 | 0.2292430  | -0.9666285 |
| H | -6.0119695 | -1.3777620 | -0.2640015 |
| C | -4.9483505 | 2.0028200  | 1.2523215  |
| H | -5.8675445 | 2.0675470  | 1.8467795  |
| H | -4.1039355 | 2.3602910  | 1.8538545  |
| H | -5.0440065 | 2.6299630  | 0.3600565  |
| C | -3.1129255 | -4.4305620 | -1.7264625 |

|   |            |            |            |
|---|------------|------------|------------|
| F | -3.4572355 | -3.4000650 | -2.4843825 |
| F | -4.1835315 | -5.1522870 | -1.4499675 |
| F | -2.2211675 | -5.1678410 | -2.3535065 |
| S | -2.4146805 | -3.8053070 | -0.1445445 |
| O | -1.1976815 | -2.9752500 | -0.7213125 |
| O | -1.8884355 | -4.9381510 | 0.5719105  |
| O | -3.4297945 | -2.9330150 | 0.4152155  |
| H | 2.6955735  | 0.9845460  | 0.6270605  |
| H | -1.1315345 | 2.0994860  | -0.2902905 |
| C | 0.2319395  | 4.5276740  | -0.6983295 |
| C | 0.8017085  | 4.9320240  | -2.0580615 |
| C | -1.2906905 | 4.5525670  | -0.8036455 |
| C | 0.7100725  | 5.4934840  | 0.3840645  |
| H | 1.8930125  | 4.9616730  | -2.0393305 |
| H | 0.4829705  | 4.2208310  | -2.8296735 |
| H | 0.4255595  | 5.9259640  | -2.3285685 |
| H | -1.7945385 | 4.3038570  | 0.1386785  |
| H | -1.6024105 | 5.5658740  | -1.0807755 |
| H | -1.6478525 | 3.8671150  | -1.5835475 |
| H | 0.4081145  | 6.5184170  | 0.1350015  |
| H | 0.2803925  | 5.2432420  | 1.3619045  |
| H | 1.8015115  | 5.4636830  | 0.4612945  |
| H | 0.5742155  | 2.4626300  | 2.2134025  |

Zero-point correction= 0.675252 (Hartree/Particle)

Thermal correction to Energy= 0.724107

Thermal correction to Enthalpy= 0.725052

Thermal correction to Gibbs Free Energy= 0.592291

Sum of electronic and zero-point Energies= -3051.472645

Sum of electronic and thermal Energies= -3051.423790

Sum of electronic and thermal Enthalpies= -3051.422846

Sum of electronic and thermal Free Energies= -3051.555606

**A-ts4**

|   |            |            |            |
|---|------------|------------|------------|
| C | 0.5338455  | -3.0134318 | 1.7549254  |
| C | -0.4870645 | -2.8961508 | 2.6979754  |
| C | -1.1445915 | -1.6870728 | 2.8406784  |
| C | -0.7938425 | -0.5966468 | 2.0373014  |
| C | 0.1882475  | -0.7303968 | 1.0419504  |
| C | 0.8610945  | -1.9464178 | 0.9290964  |
| C | -1.3906745 | 0.7205582  | 2.3102534  |
| C | -0.5804585 | 1.8800312  | 1.7907664  |
| C | -0.2558915 | 1.7086412  | 0.3087034  |
| C | 0.4344885  | 0.3467262  | 0.0035554  |
| C | 0.0430305  | -0.1738168 | -1.3831596 |
| C | 1.2530605  | -0.1179568 | -2.2630806 |
| N | 2.2997385  | 0.2860052  | -1.4762426 |
| C | 1.9212865  | 0.7307872  | -0.1524086 |
| C | -1.1345395 | -0.7407468 | -1.7436006 |
| N | 0.6831575  | 2.7151822  | -0.1743656 |
| C | 1.9696345  | 2.2547412  | -0.1578446 |
| O | 2.9981515  | 2.9062242  | -0.2374846 |

|    |            |            |            |
|----|------------|------------|------------|
| O  | 1.3420435  | -0.4360228 | -3.4367026 |
| O  | -2.4145855 | 0.8859272  | 2.9589484  |
| Au | -2.9305745 | -0.0425698 | -0.6485096 |
| C  | -1.4132285 | -1.1961818 | -3.1540456 |
| C  | 6.1794505  | -0.9458598 | 0.6081414  |
| C  | 6.0838845  | -2.3273268 | 0.4196334  |
| C  | 5.2122155  | -2.8387918 | -0.5451126 |
| C  | 4.4535725  | -1.9602518 | -1.3125646 |
| C  | 4.5473875  | -0.5813138 | -1.1401616 |
| C  | 5.4147775  | -0.0857718 | -0.1635156 |
| C  | 3.6754395  | 0.3403442  | -1.9444716 |
| O  | 6.8712525  | -3.0870698 | 1.2198684  |
| C  | 6.8098905  | -4.4832728 | 1.0676534  |
| H  | 1.0535305  | -3.9607228 | 1.6369234  |
| H  | -0.7716445 | -3.7520718 | 3.3030074  |
| H  | -1.9328355 | -1.5497148 | 3.5772494  |
| H  | 1.6232495  | -2.0725318 | 0.1591804  |
| H  | -1.1259875 | 2.8105552  | 1.9835604  |
| H  | -1.5304685 | -1.7292868 | -0.9548696 |
| H  | -0.5951515 | -1.8045278 | -3.5535456 |
| H  | -2.3398315 | -1.7775978 | -3.1887356 |
| H  | -1.5132375 | -0.3381888 | -3.8297926 |
| H  | 6.8609765  | -0.5768518 | 1.3703674  |
| H  | 5.1228455  | -3.9086858 | -0.7090106 |
| H  | 3.7706125  | -2.3539248 | -2.0672446 |

|   |            |            |            |
|---|------------|------------|------------|
| H | 5.4757105  | 0.9914042  | -0.0075296 |
| H | 3.6350005  | 0.0480902  | -3.0004536 |
| H | 4.0373005  | 1.3744342  | -1.8800736 |
| H | 7.5086095  | -4.9063868 | 1.7922374  |
| H | 7.1096585  | -4.7965618 | 0.0571694  |
| H | 5.8021645  | -4.8719728 | 1.2744044  |
| P | -4.8207695 | 0.8029392  | 0.4598234  |
| C | -5.2953815 | -0.2218498 | 1.8837824  |
| H | -4.4494135 | -0.2413338 | 2.5796764  |
| H | -6.1821205 | 0.1979802  | 2.3736914  |
| H | -5.4811025 | -1.2449078 | 1.5462604  |
| C | -6.3204885 | 0.9019762  | -0.5773116 |
| H | -7.1707845 | 1.2669442  | 0.0110864  |
| H | -6.1460515 | 1.5755622  | -1.4218906 |
| H | -6.5521105 | -0.0933808 | -0.9692206 |
| C | -4.6166785 | 2.4824402  | 1.1447984  |
| H | -5.5501745 | 2.8208542  | 1.6104424  |
| H | -3.8269975 | 2.4424242  | 1.9055954  |
| H | -4.3320735 | 3.1796992  | 0.3497224  |
| C | -3.9193825 | -4.0593308 | -1.2762946 |
| F | -4.2160035 | -2.9828198 | -2.0124176 |
| F | -5.0467735 | -4.5599028 | -0.7936276 |
| F | -3.3390265 | -4.9565048 | -2.0533216 |
| S | -2.8104585 | -3.5693938 | 0.1004364  |
| O | -1.6189245 | -3.0324108 | -0.6666336 |



|   |            |            |            |
|---|------------|------------|------------|
| O | -2.5114095 | -4.7901038 | 0.8244504  |
| O | -3.5650295 | -2.5132798 | 0.7839234  |
| H | 2.5873945  | 0.3068862  | 0.6124424  |
| H | -1.1918715 | 1.7704532  | -0.2595926 |
| C | 0.3350915  | 4.1448352  | -0.3950206 |
| C | 1.0175125  | 4.6198512  | -1.6776836 |
| C | -1.1731785 | 4.2821912  | -0.5874536 |
| C | 0.8001665  | 4.9834862  | 0.7938484  |
| H | 2.1050195  | 4.5756992  | -1.5897996 |
| H | 0.7071045  | 3.9992382  | -2.5269426 |
| H | 0.7241225  | 5.6560902  | -1.8832176 |
| H | -1.7485285 | 4.0035802  | 0.3041134  |
| H | -1.3996245 | 5.3321672  | -0.8038996 |
| H | -1.5268075 | 3.6822992  | -1.4365036 |
| H | 0.5806165  | 6.0431232  | 0.6138214  |
| H | 0.2909155  | 4.6865142  | 1.7187114  |
| H | 1.8797395  | 4.8735102  | 0.9358054  |
| H | 0.3627785  | 1.9209142  | 2.3593774  |

Zero-point correction= 0.669047 (Hartree/Particle)

Thermal correction to Energy= 0.717845

Thermal correction to Enthalpy= 0.718789

Thermal correction to Gibbs Free Energy= 0.584466

Sum of electronic and zero-point Energies= -3051.459083

Sum of electronic and thermal Energies= -3051.410285

Sum of electronic and thermal Enthalpies= -3051.409341

Sum of electronic and thermal Free Energies= -3051.543664

**A-2**

|    |            |            |            |
|----|------------|------------|------------|
| C  | 1.5813637  | -1.5174890 | -1.9711039 |
| C  | 1.9254737  | -0.4909020 | -2.8522429 |
| C  | 1.2266767  | 0.7029420  | -2.8051429 |
| C  | 0.1721017  | 0.8706490  | -1.8951029 |
| C  | -0.1580173 | -0.1488080 | -0.9865399 |
| C  | 0.5694977  | -1.3388500 | -1.0384139 |
| C  | -0.6387263 | 2.0962790  | -1.9547649 |
| C  | -2.0415043 | 1.9349730  | -1.4321649 |
| C  | -2.0269043 | 1.3471690  | -0.0190699 |
| C  | -1.2375723 | 0.0216550  | 0.0670421  |
| C  | -0.6805623 | -0.2076020 | 1.4680661  |
| C  | -1.1628533 | -1.5232080 | 1.9660121  |
| N  | -2.0702833 | -1.9908960 | 1.0456761  |
| C  | -2.3261473 | -1.0654150 | -0.0365489 |
| C  | 0.1846287  | 0.5965400  | 2.0938381  |
| N  | -3.3619823 | 0.9854790  | 0.4492721  |
| C  | -3.6412243 | -0.3388060 | 0.2267631  |
| O  | -4.7263183 | -0.8882320 | 0.2839311  |
| O  | -0.8214523 | -2.1285260 | 2.9697181  |
| O  | -0.2312813 | 3.1551780  | -2.4161069 |
| Au | 2.8450027  | 1.5350170  | 0.1112221  |
| C  | 0.8508907  | 0.3644060  | 3.4024531  |
| C  | -0.4916373 | -4.8120750 | -1.9815169 |

|   |            |            |            |
|---|------------|------------|------------|
| C | 0.7672127  | -5.0099020 | -1.4053529 |
| C | 0.9364047  | -4.8217480 | -0.0310709 |
| C | -0.1398263 | -4.3926060 | 0.7374771  |
| C | -1.3866913 | -4.1317020 | 0.1650451  |
| C | -1.5508393 | -4.3700720 | -1.2023589 |
| C | -2.4307323 | -3.4059710 | 0.9717441  |
| O | 1.7604097  | -5.3661930 | -2.2539809 |
| C | 3.0585977  | -5.5188530 | -1.7152579 |
| H | 2.1200727  | -2.4637380 | -1.9865709 |
| H | 2.7331147  | -0.6305680 | -3.5657179 |
| H | 1.4443837  | 1.5146130  | -3.4968469 |
| H | 0.3654237  | -2.1406280 | -0.3305259 |
| H | -2.5513603 | 2.9032670  | -1.4708619 |
| H | 0.4036007  | -0.4749740 | 3.9374311  |
| H | 1.9088507  | 0.1242080  | 3.2188111  |
| H | 0.8257087  | 1.2667800  | 4.0252151  |
| H | -0.6021133 | -4.9854460 | -3.0491339 |
| H | 1.9052867  | -4.9591950 | 0.4389031  |
| H | 0.0042487  | -4.1994830 | 1.7992881  |
| H | -2.5212183 | -4.1891940 | -1.6664259 |
| H | -2.4753963 | -3.7706500 | 2.0035621  |
| H | -3.4325553 | -3.4797980 | 0.5329921  |
| H | 3.7100687  | -5.7679700 | -2.5554619 |
| H | 3.0941787  | -6.3378730 | -0.9828379 |
| H | 3.4138747  | -4.5951000 | -1.2360009 |

|   |            |            |            |
|---|------------|------------|------------|
| P | 2.8403357  | 3.7530280  | -0.4612369 |
| C | 2.9142027  | 4.0998570  | -2.2444769 |
| H | 1.9672457  | 3.7755420  | -2.6908039 |
| H | 3.0489077  | 5.1753550  | -2.4103199 |
| H | 3.7450207  | 3.5492730  | -2.6958219 |
| C | 4.2653147  | 4.6389490  | 0.2546701  |
| H | 4.2379847  | 5.6983750  | -0.0267839 |
| H | 4.2444337  | 4.5490600  | 1.3450231  |
| H | 5.1936197  | 4.1884160  | -0.1096949 |
| C | 1.3801577  | 4.6724280  | 0.1258651  |
| H | 1.4940447  | 5.7407260  | -0.0937299 |
| H | 0.4941587  | 4.2944640  | -0.3958849 |
| H | 1.2607787  | 4.5308490  | 1.2046261  |
| C | 5.0033837  | -1.2565600 | 1.9876501  |
| F | 5.3163137  | 0.0113080  | 2.2472551  |
| F | 6.1179967  | -1.9603480 | 1.8746151  |
| F | 4.2852027  | -1.7307530 | 2.9939231  |
| S | 4.0454327  | -1.3384460 | 0.4241501  |
| O | 2.8423947  | -0.4914110 | 0.8122871  |
| O | 3.6933347  | -2.7408600 | 0.2500951  |
| O | 4.8876447  | -0.6895390 | -0.5765089 |
| H | -2.3447933 | -1.5855860 | -1.0055499 |
| H | -1.5736493 | 2.0838800  | 0.6587801  |
| C | -4.4060733 | 1.9632000  | 0.8592621  |
| C | -5.1207713 | 1.4273730  | 2.1001181  |

|   |            |           |            |
|---|------------|-----------|------------|
| C | -3.7515373 | 3.2885030 | 1.2345091  |
| C | -5.4024943 | 2.1652080 | -0.2808679 |
| H | -5.6404603 | 0.4910230 | 1.8878861  |
| H | -4.3999453 | 1.2533190 | 2.9079301  |
| H | -5.8527973 | 2.1675180 | 2.4448581  |
| H | -3.2334783 | 3.7684130 | 0.3958071  |
| H | -4.5337913 | 3.9792150 | 1.5684081  |
| H | -3.0441393 | 3.1627010 | 2.0636061  |
| H | -6.1959023 | 2.8552730 | 0.0319411  |
| H | -4.9163913 | 2.5908830 | -1.1674229 |
| H | -5.8629473 | 1.2110630 | -0.5550839 |
| H | -2.5799603 | 1.2403850 | -2.0970369 |
| H | 0.4813537  | 1.5112350 | 1.5606201  |

Zero-point correction= 0.675231 (Hartree/Particle)

Thermal correction to Energy= 0.724246

Thermal correction to Enthalpy= 0.725190

Thermal correction to Gibbs Free Energy= 0.590201

Sum of electronic and zero-point Energies= -3051.501736

Sum of electronic and thermal Energies= -3051.452721

Sum of electronic and thermal Enthalpies= -3051.451777

Sum of electronic and thermal Free Energies= -3051.586766

#### **A-int5**

|   |            |           |            |
|---|------------|-----------|------------|
| C | 1.4418499  | 1.5902733 | -3.0321335 |
| C | 0.2303059  | 1.6720943 | -3.7139045 |
| C | -0.9453941 | 1.3117263 | -3.0728755 |

|    |            |            |            |
|----|------------|------------|------------|
| C  | -0.9239091 | 0.8752373  | -1.7440535 |
| C  | 0.2969269  | 0.7619623  | -1.0652865 |
| C  | 1.4707079  | 1.1294763  | -1.7222815 |
| C  | -2.1699091 | 0.5924143  | -1.0310885 |
| C  | -2.1872711 | 0.1973563  | 0.2568325  |
| C  | -0.9651381 | -0.2658727 | 0.9476655  |
| C  | 0.3899669  | 0.2247463  | 0.3500525  |
| C  | 1.0733009  | 1.1816803  | 1.3295645  |
| C  | 2.1340559  | 0.4229323  | 2.0311005  |
| N  | 2.0952589  | -0.8964367 | 1.5622365  |
| C  | 1.2968189  | -1.0198637 | 0.3645385  |
| C  | 0.7160079  | 2.4693813  | 1.5379275  |
| N  | -0.9427491 | -1.8172567 | 0.9336865  |
| C  | 0.4181149  | -2.2327737 | 0.4821535  |
| O  | 0.7064419  | -3.3720617 | 0.2715525  |
| O  | 2.9408319  | 0.7827483  | 2.8721175  |
| O  | -3.2973001 | 0.8169863  | -1.7303605 |
| Au | -0.8881231 | 3.3430103  | 0.5388765  |
| C  | 1.4087439  | 3.3358703  | 2.5447375  |
| C  | 5.1321259  | -2.5670977 | -1.4422715 |
| C  | 5.9747619  | -1.4571547 | -1.5476725 |
| C  | 5.9345949  | -0.4595637 | -0.5707335 |
| C  | 5.0585929  | -0.5865017 | 0.5036655  |
| C  | 4.2214339  | -1.6948437 | 0.6249705  |
| C  | 4.2654769  | -2.6786977 | -0.3674885 |

|   |            |            |            |
|---|------------|------------|------------|
| C | 3.2402579  | -1.7810527 | 1.7610585  |
| O | 6.7898949  | -1.4375427 | -2.6299395 |
| C | 7.6655469  | -0.3472097 | -2.7743915 |
| H | 2.3686649  | 1.8746573  | -3.5243435 |
| H | 0.2046199  | 2.0092483  | -4.7472235 |
| H | -1.8989541 | 1.3490893  | -3.5926935 |
| H | 2.4225879  | 1.0581803  | -1.1938815 |
| H | -3.1455731 | 0.0500483  | 0.7464195  |
| H | -3.9883911 | 0.1960013  | -1.3936595 |
| H | 2.2089069  | 2.8310943  | 3.0920075  |
| H | 1.8203449  | 4.2191603  | 2.0379205  |
| H | 0.6719319  | 3.7304293  | 3.2573845  |
| H | 5.1778989  | -3.3246987 | -2.2202825 |
| H | 6.5817869  | 0.4105023  | -0.6315225 |
| H | 5.0240509  | 0.1882923  | 1.2694145  |
| H | 3.5991299  | -3.5386787 | -0.2958395 |
| H | 3.6911369  | -1.4612047 | 2.7069095  |
| H | 2.8811109  | -2.8121657 | 1.8821565  |
| H | 8.2314689  | -0.5220887 | -3.6916215 |
| H | 8.3664209  | -0.2732587 | -1.9304215 |
| H | 7.1210439  | 0.6037963  | -2.8665895 |
| P | -2.8198751 | 4.3264473  | -0.4804875 |
| C | -2.9706341 | 4.2012353  | -2.2974315 |
| H | -3.0998551 | 3.1443293  | -2.5558135 |
| H | -3.8402561 | 4.7695493  | -2.6490235 |

|   |            |            |            |
|---|------------|------------|------------|
| H | -2.0633791 | 4.5756963  | -2.7811485 |
| C | -3.0450521 | 6.1118803  | -0.1446025 |
| H | -3.9740911 | 6.4800613  | -0.5962335 |
| H | -3.0765341 | 6.2785913  | 0.9366865  |
| H | -2.1975161 | 6.6712593  | -0.5525485 |
| C | -4.3838881 | 3.5772153  | 0.0985785  |
| H | -5.2481541 | 4.0963753  | -0.3328815 |
| H | -4.3984191 | 2.5285113  | -0.2179305 |
| H | -4.4372531 | 3.6202123  | 1.1906185  |
| C | -5.0206301 | -3.8610147 | -0.5781145 |
| F | -4.5728821 | -5.0300987 | -1.0111605 |
| F | -6.3045211 | -3.7475877 | -0.8742855 |
| F | -4.8855721 | -3.8278317 | 0.7512705  |
| S | -4.0625781 | -2.4962397 | -1.3407645 |
| O | -2.6803951 | -2.7994897 | -0.8765505 |
| O | -4.6468971 | -1.2979407 | -0.6886775 |
| O | -4.2748281 | -2.6162117 | -2.7723805 |
| H | 1.9262129  | -1.1320007 | -0.5323575 |
| H | -0.9756691 | 0.0093563  | 2.0072815  |
| H | -1.6252551 | -2.1396427 | 0.1803725  |
| C | -1.4402991 | -2.5282807 | 2.2313165  |
| C | -0.4216201 | -2.3121097 | 3.3365645  |
| C | -2.7909461 | -1.9239887 | 2.5914295  |
| C | -1.6202831 | -4.0124527 | 1.9329445  |
| H | 0.5475799  | -2.7650067 | 3.0976215  |



|   |            |            |           |
|---|------------|------------|-----------|
| H | -0.2598761 | -1.2538807 | 3.5714895 |
| H | -0.7970191 | -2.7970687 | 4.2445625 |
| H | -3.5063991 | -2.0074227 | 1.7659035 |
| H | -3.1940961 | -2.4885487 | 3.4394095 |
| H | -2.7198081 | -0.8769367 | 2.9044955 |
| H | -2.0821241 | -4.4733197 | 2.8136425 |
| H | -2.2850801 | -4.1687217 | 1.0774565 |
| H | -0.6725181 | -4.5172947 | 1.7383585 |

Zero-point correction= 0.675324 (Hartree/Particle)

Thermal correction to Energy= 0.724197

Thermal correction to Enthalpy= 0.725141

Thermal correction to Gibbs Free Energy= 0.590253

Sum of electronic and zero-point Energies= -3051.445582

Sum of electronic and thermal Energies= -3051.396709

Sum of electronic and thermal Enthalpies= -3051.395765

Sum of electronic and thermal Free Energies= -3051.530653

#### **A-ts5**

|   |            |            |            |
|---|------------|------------|------------|
| C | 0.0188718  | -1.0239109 | 3.3090560  |
| C | -1.1189202 | -0.3205259 | 3.7087430  |
| C | -1.8932372 | 0.3138021  | 2.7539050  |
| C | -1.5374252 | 0.2194991  | 1.4035740  |
| C | -0.3523722 | -0.4181649 | 0.9967730  |
| C | 0.4064468  | -1.0598229 | 1.9747870  |
| C | -2.3887182 | 0.7364561  | 0.3671730  |
| C | -2.0784992 | 0.7502261  | -1.0239440 |

|    |            |            |            |
|----|------------|------------|------------|
| C  | -0.6465222 | 0.5551141  | -1.4052540 |
| C  | 0.1250838  | -0.4199929 | -0.4443200 |
| C  | 0.2016328  | -1.8147009 | -1.0675750 |
| C  | 1.4997348  | -1.8931229 | -1.7852620 |
| N  | 2.1700498  | -0.6810509 | -1.5888330 |
| C  | 1.5709078  | 0.0928661  | -0.5236310 |
| C  | -0.7470402 | -2.7763999 | -0.9995240 |
| N  | 0.1440748  | 1.8622531  | -1.4117960 |
| C  | 1.5189688  | 1.5349751  | -0.9437470 |
| O  | 2.4171168  | 2.3227241  | -0.9364980 |
| O  | 1.9831898  | -2.7980399 | -2.4446640 |
| O  | -3.5289082 | 1.3020651  | 0.5376010  |
| Au | -2.5904542 | -2.5074289 | -0.0633860 |
| C  | -0.5801992 | -4.1051589 | -1.6746780 |
| C  | 5.6892118  | -0.2561829 | 1.3398510  |
| C  | 5.7843028  | -1.5882519 | 1.7511360  |
| C  | 5.1828728  | -2.5939019 | 0.9907520  |
| C  | 4.4994398  | -2.2568839 | -0.1741510 |
| C  | 4.4056398  | -0.9321239 | -0.5992050 |
| C  | 5.0041818  | 0.0634971  | 0.1789890  |
| C  | 3.6083428  | -0.5886049 | -1.8279330 |
| O  | 6.4745258  | -1.8029439 | 2.8977690  |
| C  | 6.6068838  | -3.1281439 | 3.3473020  |
| H  | 0.6292458  | -1.5304099 | 4.0532120  |
| H  | -1.3818072 | -0.2578709 | 4.7612490  |

|   |            |            |            |
|---|------------|------------|------------|
| H | -2.7607772 | 0.9137851  | 3.0188290  |
| H | 1.3094638  | -1.6000529 | 1.6900440  |
| H | -3.1881062 | 1.6382521  | -0.6651810 |
| H | 0.3723098  | -4.2236129 | -2.1965870 |
| H | -0.6911002 | -4.9070989 | -0.9326110 |
| H | -1.4020022 | -4.2563759 | -2.3880030 |
| H | 6.1595898  | 0.5076531  | 1.9536400  |
| H | 5.2463358  | -3.6361139 | 1.2897820  |
| H | 4.0301388  | -3.0380309 | -0.7719950 |
| H | 4.9185248  | 1.1054231  | -0.1289760 |
| H | 3.8114568  | -1.2882079 | -2.6459620 |
| H | 3.8474128  | 0.4254681  | -2.1739340 |
| H | 7.1904128  | -3.0872089 | 4.2693110  |
| H | 7.1370768  | -3.7553929 | 2.6162100  |
| H | 5.6301558  | -3.5853599 | 3.5629470  |
| P | -4.8118632 | -2.1789479 | 0.7798550  |
| C | -5.0233822 | -1.2636959 | 2.3465090  |
| H | -4.6809102 | -0.2344649 | 2.1877170  |
| H | -6.0799672 | -1.2518309 | 2.6399730  |
| H | -4.4251142 | -1.7210129 | 3.1403770  |
| C | -5.7731372 | -3.7160009 | 1.0299380  |
| H | -6.7991692 | -3.4876989 | 1.3423930  |
| H | -5.7963852 | -4.2869449 | 0.0964230  |
| H | -5.2899522 | -4.3308399 | 1.7954410  |
| C | -5.8393192 | -1.2075959 | -0.3798800 |

|   |            |            |            |
|---|------------|------------|------------|
| H | -6.8704292 | -1.1284379 | -0.0150610 |
| H | -5.4102832 | -0.2023549 | -0.4594990 |
| H | -5.8351642 | -1.6779479 | -1.3680330 |
| C | -0.7844492 | 5.5302531  | 1.4474450  |
| F | -0.0498612 | 5.4016811  | 2.5431050  |
| F | -1.6979982 | 6.4693521  | 1.6480850  |
| F | 0.0081008  | 5.9139661  | 0.4480710  |
| S | -1.6023592 | 3.9399491  | 1.0398230  |
| O | -0.4213152 | 3.0316491  | 0.8335750  |
| O | -2.3066662 | 4.2027781  | -0.2219660 |
| O | -2.3908332 | 3.6203311  | 2.2210930  |
| H | 2.1474218  | 0.0186531  | 0.4115810  |
| H | -0.5523002 | 0.1484861  | -2.4182240 |
| H | -0.2319692 | 2.4617281  | -0.5880040 |
| C | 0.0816758  | 2.7302711  | -2.7003270 |
| C | 1.0198808  | 2.1279601  | -3.7355340 |
| C | -1.3502572 | 2.7553861  | -3.2154900 |
| C | 0.4777048  | 4.1523571  | -2.3234550 |
| H | 2.0715978  | 2.2280491  | -3.4490040 |
| H | 0.8050518  | 1.0693421  | -3.9280100 |
| H | 0.8829778  | 2.6662261  | -4.6796560 |
| H | -2.0348652 | 3.1501061  | -2.4577080 |
| H | -1.3669792 | 3.4307681  | -4.0791210 |
| H | -1.7040332 | 1.7769441  | -3.5573340 |
| H | 0.4933078  | 4.7520801  | -3.2410970 |

|   |            |           |            |
|---|------------|-----------|------------|
| H | -0.2656302 | 4.5897891 | -1.6486060 |
| H | 1.4646448  | 4.2050801 | -1.8601410 |
| H | -2.7652812 | 0.1016231 | -1.5802390 |

Zero-point correction= 0.668926 (Hartree/Particle)

Thermal correction to Energy= 0.717581

Thermal correction to Enthalpy= 0.718525

Thermal correction to Gibbs Free Energy= 0.584806

Sum of electronic and zero-point Energies= -3051.360716

Sum of electronic and thermal Energies= -3051.312061

Sum of electronic and thermal Enthalpies= -3051.311116

Sum of electronic and thermal Free Energies= -3051.444836

#### **A-int6**

|   |            |            |            |
|---|------------|------------|------------|
| C | -0.2048942 | 1.1041868  | 3.2859863  |
| C | 1.0595438  | 0.6749818  | 3.6952963  |
| C | 1.9506558  | 0.1974018  | 2.7528933  |
| C | 1.5807528  | 0.1267818  | 1.4044693  |
| C | 0.2871728  | 0.4726758  | 0.9998883  |
| C | -0.5880182 | 0.9955398  | 1.9577383  |
| C | 2.6203428  | -0.1884672 | 0.4111283  |
| C | 2.2173298  | -0.4218982 | -1.0249307 |
| C | 0.7345158  | -0.5578802 | -1.3291277 |
| C | -0.1982482 | 0.3061618  | -0.4241187 |
| C | -0.5728812 | 1.6015378  | -1.1464107 |
| C | -1.8523092 | 1.3385478  | -1.8546267 |
| N | -2.2510562 | 0.0294918  | -1.5506637 |

|    |            |            |            |
|----|------------|------------|------------|
| C  | -1.5077662 | -0.4953352 | -0.4278747 |
| C  | 0.1370238  | 2.7524938  | -1.1531917 |
| N  | 0.2455878  | -1.9910012 | -1.2371077 |
| C  | -1.1402122 | -1.9295042 | -0.6770037 |
| O  | -1.8035982 | -2.9019612 | -0.4799597 |
| O  | -2.5148942 | 2.0590878  | -2.5814767 |
| O  | 3.8091838  | -0.1666022 | 0.6894213  |
| Au | 1.9718748  | 2.9917608  | -0.1909407 |
| C  | -0.3133312 | 3.9572378  | -1.9248397 |
| C  | -5.5492452 | -0.7394042 | 1.5391703  |
| C  | -5.9389632 | 0.5795188  | 1.7878963  |
| C  | -5.5945562 | 1.5869368  | 0.8838193  |
| C  | -4.8710502 | 1.2640398  | -0.2605007 |
| C  | -4.4849032 | -0.0496182 | -0.5241977 |
| C  | -4.8287492 | -1.0449242 | 0.3962523  |
| C  | -3.6476582 | -0.3645332 | -1.7334237 |
| O  | -6.6422852 | 0.7807488  | 2.9284593  |
| C  | -7.0664832 | 2.0897058  | 3.2172483  |
| H  | -0.9049252 | 1.5080208  | 4.0137073  |
| H  | 1.3394568  | 0.7184618  | 4.7447903  |
| H  | 2.9441588  | -0.1530362 | 3.0235673  |
| H  | -1.5806982 | 1.3298628  | 1.6543873  |
| H  | 2.7970628  | -1.2870632 | -1.3625667 |
| H  | -1.2578952 | 3.8202938  | -2.4566627 |
| H  | -0.4005452 | 4.8139798  | -1.2432617 |

|   |            |            |            |
|---|------------|------------|------------|
| H | 0.4669488  | 4.2402058  | -2.6445927 |
| H | -5.8240322 | -1.5032772 | 2.2619443  |
| H | -5.8885602 | 2.6182588  | 1.0555193  |
| H | -4.6009192 | 2.0471318  | -0.9682237 |
| H | -4.5136312 | -2.0727112 | 0.2141773  |
| H | -3.9919842 | 0.1860068  | -2.6154677 |
| H | -3.6887022 | -1.4379042 | -1.9609507 |
| H | -7.6118312 | 2.0387118  | 4.1618003  |
| H | -7.7362642 | 2.4818408  | 2.4384173  |
| H | -6.2164002 | 2.7777768  | 3.3322373  |
| P | 4.1910868  | 3.2606798  | 0.6800443  |
| C | 4.5615268  | 2.5655288  | 2.3262223  |
| H | 4.4695358  | 1.4761828  | 2.2496593  |
| H | 5.5822378  | 2.8285098  | 2.6286963  |
| H | 3.8476888  | 2.9359538  | 3.0682063  |
| C | 4.7597368  | 4.9974938  | 0.7886153  |
| H | 5.8043578  | 5.0436918  | 1.1190393  |
| H | 4.6690228  | 5.4739498  | -0.1926167 |
| H | 4.1323678  | 5.5472988  | 1.4969523  |
| C | 5.4338168  | 2.4583418  | -0.3924767 |
| H | 6.4461938  | 2.6252778  | -0.0052507 |
| H | 5.2234578  | 1.3824028  | -0.4092177 |
| H | 5.3603798  | 2.8589248  | -1.4085107 |
| C | 2.3628438  | -5.2476802 | 1.4379703  |
| F | 1.7980758  | -5.2703612 | 2.6358263  |

|   |            |            |            |
|---|------------|------------|------------|
| F | 3.4939408  | -5.9362222 | 1.4787873  |
| F | 1.5396078  | -5.8332352 | 0.5693043  |
| S | 2.7069218  | -3.5179372 | 0.9328073  |
| O | 1.3268868  | -2.9168352 | 0.9181423  |
| O | 3.2472998  | -3.6316432 | -0.4297997 |
| O | 3.5675658  | -2.9949452 | 1.9804493  |
| H | -2.0857182 | -0.4435672 | 0.5069563  |
| H | 0.5453718  | -0.2511902 | -2.3641157 |
| H | 0.8006978  | -2.4834192 | -0.4351767 |
| C | 0.3523948  | -2.8735342 | -2.5258607 |
| C | -0.7859462 | -2.5012832 | -3.4643807 |
| C | 1.6962968  | -2.6393242 | -3.2019537 |
| C | 0.2810338  | -4.3317472 | -2.0936127 |
| H | -1.7626662 | -2.7944772 | -3.0665387 |
| H | -0.8073672 | -1.4298272 | -3.6976407 |
| H | -0.6430352 | -3.0405702 | -4.4068387 |
| H | 2.5271358  | -2.9272412 | -2.5489797 |
| H | 1.7273128  | -3.2938952 | -4.0804077 |
| H | 1.8302648  | -1.6136542 | -3.5632567 |
| H | 0.2958138  | -4.9509812 | -2.9981657 |
| H | 1.1546808  | -4.5980942 | -1.4905047 |
| H | -0.6284952 | -4.5595592 | -1.5347577 |
| H | 2.6035528  | 0.4427178  | -1.5857107 |

Zero-point correction= 0.674856 (Hartree/Particle)

Thermal correction to Energy= 0.723721



Thermal correction to Enthalpy= 0.724665

Thermal correction to Gibbs Free Energy= 0.589757

Sum of electronic and zero-point Energies= -3051.451901

Sum of electronic and thermal Energies= -3051.403036

Sum of electronic and thermal Enthalpies= -3051.402092

Sum of electronic and thermal Free Energies= -3051.537000

**A-int7**

|   |            |            |            |
|---|------------|------------|------------|
| C | 1.2830962  | -1.8442496 | 2.8902380  |
| C | 0.3740102  | -1.6127096 | 3.9243800  |
| C | -0.7001718 | -0.7728796 | 3.7026590  |
| C | -0.8702608 | -0.1497046 | 2.4593030  |
| C | 0.0478092  | -0.3700376 | 1.4197570  |
| C | 1.1200032  | -1.2360106 | 1.6559090  |
| C | -2.0823768 | 0.6711994  | 2.2602220  |
| C | -2.2416448 | 1.3067474  | 0.9509590  |
| C | -1.3896538 | 1.0688904  | -0.0527720 |
| C | -0.1369848 | 0.2647784  | 0.0519900  |
| C | -0.0770378 | -0.8131746 | -1.0499670 |
| C | 1.2473932  | -0.7009116 | -1.7199900 |
| N | 1.9415392  | 0.3198254  | -1.0962210 |
| C | 1.0650102  | 1.2063624  | -0.3724880 |
| C | -1.0224478 | -1.7527396 | -1.2605260 |
| N | 1.3386302  | 3.1567544  | 1.1517740  |
| C | 1.7448062  | 1.8896734  | 0.8062390  |
| O | 2.5676062  | 1.3026654  | 1.4896160  |

|    |            |            |            |
|----|------------|------------|------------|
| O  | 1.7102632  | -1.3489046 | -2.6435460 |
| O  | -2.9603198 | 0.7703444  | 3.1170400  |
| H  | 0.6530802  | 1.9754374  | -1.0487840 |
| Au | -2.6895778 | -1.8933976 | 0.0049170  |
| C  | -0.8730318 | -2.8223046 | -2.3026470 |
| C  | 0.9896092  | 4.3407824  | 0.3223410  |
| C  | -0.4677808 | 4.3287184  | -0.1241100 |
| C  | 1.9272892  | 4.4739404  | -0.8764220 |
| C  | 1.1950322  | 5.5404094  | 1.2449470  |
| C  | 5.7479622  | -1.4948816 | 0.1673970  |
| C  | 6.3432202  | -2.1722056 | -0.9017740 |
| C  | 5.9193532  | -1.9169646 | -2.2047190 |
| C  | 4.9059182  | -0.9858216 | -2.4223630 |
| C  | 4.3161702  | -0.2976686 | -1.3700840 |
| C  | 4.7470272  | -0.5684516 | -0.0657810 |
| C  | 3.2390692  | 0.7241394  | -1.6226730 |
| O  | 7.3182182  | -3.0576136 | -0.5692010 |
| C  | 7.9346512  | -3.7699896 | -1.6104360 |
| H  | 2.1303342  | -2.5075666 | 3.0478560  |
| H  | 0.5089682  | -2.0915156 | 4.8912160  |
| H  | -1.4371658 | -0.5692006 | 4.4764020  |
| H  | 1.8440662  | -1.4253776 | 0.8677800  |
| H  | -3.1353758 | 1.9125364  | 0.8153430  |
| H  | -1.5940428 | 1.4793014  | -1.0447190 |
| H  | 1.8354292  | 3.4072184  | 2.0017320  |

|   |            |            |            |
|---|------------|------------|------------|
| H | 0.0496722  | -2.7376406 | -2.8817530 |
| H | -0.9023598 | -3.8058086 | -1.8138260 |
| H | -1.7313228 | -2.8135786 | -2.9884760 |
| H | -1.1323308 | 4.1888534  | 0.7356590  |
| H | -0.7119748 | 5.2841004  | -0.6044270 |
| H | -0.6794058 | 3.5360434  | -0.8490010 |
| H | 2.9740532  | 4.4860754  | -0.5486380 |
| H | 1.7251272  | 5.4111014  | -1.4092000 |
| H | 1.8026422  | 3.6567934  | -1.5970780 |
| H | 0.9439842  | 6.4690734  | 0.7214480  |
| H | 0.5527182  | 5.4638594  | 2.1307160  |
| H | 2.2398132  | 5.6114064  | 1.5734660  |
| H | 6.0968192  | -1.7158026 | 1.1733310  |
| H | 6.3550962  | -2.4396246 | -3.0511130 |
| H | 4.5516922  | -0.8090096 | -3.4366470 |
| H | 4.2764412  | -0.0451276 | 0.7660680  |
| H | 3.1520532  | 0.9109144  | -2.7042010 |
| H | 3.5031222  | 1.6737284  | -1.1391050 |
| H | 8.6775342  | -4.4224386 | -1.1461890 |
| H | 8.4422982  | -3.0996036 | -2.3197010 |
| H | 7.2135522  | -4.3879106 | -2.1654040 |
| P | -4.6131988 | -2.0238016 | 1.4346000  |
| C | -4.2577998 | -2.3348836 | 3.2001660  |
| H | -3.7242868 | -1.4613446 | 3.5944830  |
| H | -5.1887078 | -2.4758576 | 3.7626120  |

|   |            |            |            |
|---|------------|------------|------------|
| H | -3.6246438 | -3.2207906 | 3.3083800  |
| C | -5.8009268 | -3.3275666 | 0.9566850  |
| H | -6.6706868 | -3.3251376 | 1.6245810  |
| H | -6.1253678 | -3.1437476 | -0.0724900 |
| H | -5.3119138 | -4.3056396 | 1.0001330  |
| C | -5.6267348 | -0.5047566 | 1.4924690  |
| H | -6.5014458 | -0.6646846 | 2.1347920  |
| H | -5.0171158 | 0.3046134  | 1.9117390  |
| H | -5.9592268 | -0.2443086 | 0.4831870  |
| C | -5.2183598 | 1.2311614  | -2.2867170 |
| F | -4.5279878 | 1.4207664  | -1.1690630 |
| F | -6.5041898 | 1.3982374  | -2.0375610 |
| F | -4.8181548 | 2.0870124  | -3.2027340 |
| S | -4.9622258 | -0.4946486 | -2.8692110 |
| O | -3.3797878 | -0.5037186 | -2.9506810 |
| O | -5.4869928 | -0.5710026 | -4.2061880 |
| O | -5.4301508 | -1.3453576 | -1.7924490 |
| H | -2.9670098 | -0.8753886 | -2.1234590 |

Zero-point correction= 0.672481 (Hartree/Particle)

Thermal correction to Energy= 0.722808

Thermal correction to Enthalpy= 0.723752

Thermal correction to Gibbs Free Energy= 0.585293

Sum of electronic and zero-point Energies= -3051.433581

Sum of electronic and thermal Energies= -3051.383254

Sum of electronic and thermal Enthalpies= -3051.382310

Sum of electronic and thermal Free Energies= -3051.520769

**A-ts6**

|    |            |            |            |
|----|------------|------------|------------|
| C  | 1.5539089  | -2.3615416 | 2.0471716  |
| C  | 0.7319389  | -2.4952916 | 3.1659396  |
| C  | -0.3939071 | -1.7009116 | 3.2688536  |
| C  | -0.6988771 | -0.7613576 | 2.2761586  |
| C  | 0.1388549  | -0.6026226 | 1.1596956  |
| C  | 1.2569529  | -1.4376816 | 1.0575476  |
| C  | -1.9660191 | -0.0133766 | 2.4106856  |
| C  | -2.2469521 | 1.0006704  | 1.3922846  |
| C  | -1.4721681 | 1.1470374  | 0.3125356  |
| C  | -0.1998201 | 0.4063644  | 0.0644936  |
| C  | -0.2077401 | -0.3084626 | -1.2921944 |
| C  | 1.1632409  | -0.1650536 | -1.8705664 |
| N  | 1.8378049  | 0.7450224  | -1.0904524 |
| C  | 0.9483979  | 1.4581044  | -0.1974264 |
| C  | -1.2632471 | -0.9071426 | -1.8884454 |
| N  | 1.2840209  | 3.1978754  | 1.5429416  |
| C  | 1.6206939  | 1.9567924  | 1.0734966  |
| O  | 2.3857399  | 1.2456464  | 1.7059816  |
| O  | 1.6263409  | -0.7180706 | -2.8515114 |
| O  | -2.7861271 | -0.2646956 | 3.2919046  |
| H  | 0.4820189  | 2.3053924  | -0.7243444 |
| Au | -2.6557661 | -1.8252886 | -0.4390354 |
| C  | -1.1525331 | -1.6132786 | -3.2125794 |

|   |            |            |            |
|---|------------|------------|------------|
| C | 0.8855349  | 4.4611254  | 0.8696886  |
| C | -0.5881421 | 4.4717504  | 0.4747396  |
| C | 1.7792989  | 4.7474684  | -0.3356524 |
| C | 1.1066879  | 5.5487324  | 1.9187506  |
| C | 5.4442899  | -1.4827256 | 0.1598896  |
| C | 6.0308759  | -2.0737316 | -0.9642554 |
| C | 5.6946989  | -1.6198766 | -2.2387754 |
| C | 4.7741199  | -0.5832246 | -2.3737744 |
| C | 4.1919609  | 0.0189144  | -1.2649744 |
| C | 4.5394549  | -0.4465456 | 0.0100136  |
| C | 3.2003459  | 1.1421334  | -1.4312174 |
| O | 6.9083339  | -3.0774106 | -0.7125184 |
| C | 7.5184699  | -3.7030106 | -1.8129534 |
| H | 2.4439209  | -2.9780446 | 1.9392916  |
| H | 0.9718039  | -3.2163826 | 3.9434296  |
| H | -1.0701441 | -1.7757766 | 4.1174486  |
| H | 1.9323439  | -1.3581926 | 0.2115726  |
| H | -3.1692541 | 1.5637764  | 1.5123776  |
| H | -1.7804301 | 1.8328234  | -0.4783774 |
| H | 1.7681319  | 3.3406704  | 2.4240316  |
| H | -0.5047361 | -1.0855966 | -3.9196904 |
| H | -0.7119321 | -2.6094416 | -3.0738164 |
| H | -2.1456931 | -1.7440026 | -3.6571174 |
| H | -1.2178141 | 4.1680614  | 1.3186596  |
| H | -0.8789901 | 5.4839654  | 0.1694696  |

|   |            |            |            |
|---|------------|------------|------------|
| H | -0.8038511 | 3.8100284  | -0.3701574 |
| H | 2.8347309  | 4.7658564  | -0.0375484 |
| H | 1.5279699  | 5.7248614  | -0.7649594 |
| H | 1.6603869  | 4.0027854  | -1.1319144 |
| H | 0.8407819  | 6.5289194  | 1.5094226  |
| H | 0.4836699  | 5.3690024  | 2.8034446  |
| H | 2.1580989  | 5.5884824  | 2.2307566  |
| H | 5.7266949  | -1.8535886 | 1.1424196  |
| H | 6.1274899  | -2.0682866 | -3.1280694 |
| H | 4.4880909  | -0.2510156 | -3.3702684 |
| H | 4.0790999  | 0.0083064  | 0.8862916  |
| H | 3.2181569  | 1.5016934  | -2.4707274 |
| H | 3.4644419  | 1.9861094  | -0.7817834 |
| H | 8.1815039  | -4.4704266 | -1.4078174 |
| H | 8.1136649  | -2.9938046 | -2.4065474 |
| H | 6.7790049  | -4.1807756 | -2.4719564 |
| P | -4.2665621 | -2.7168666 | 1.0087476  |
| C | -3.7242611 | -3.4284026 | 2.5971126  |
| H | -3.2855441 | -2.6179006 | 3.1920416  |
| H | -4.5799401 | -3.8533416 | 3.1354016  |
| H | -2.9698641 | -4.2031066 | 2.4313516  |
| C | -5.2931141 | -3.9939386 | 0.2073126  |
| H | -6.1076861 | -4.3081996 | 0.8707136  |
| H | -5.7095701 | -3.5703456 | -0.7126404 |
| H | -4.6786681 | -4.8608196 | -0.0531864 |

|   |            |            |            |
|---|------------|------------|------------|
| C | -5.4533711 | -1.4199446 | 1.4898456  |
| H | -6.2689171 | -1.8536516 | 2.0812646  |
| H | -4.9260601 | -0.6689576 | 2.0905656  |
| H | -5.8530931 | -0.9527776 | 0.5839226  |
| C | -5.4345501 | 1.5479984  | -1.3587814 |
| F | -4.8858931 | 1.3976634  | -0.1512044 |
| F | -6.7358201 | 1.3232434  | -1.2559924 |
| F | -5.2311831 | 2.7889674  | -1.7650374 |
| S | -4.6977431 | 0.3459704  | -2.5340344 |
| O | -3.2212061 | 0.7037664  | -2.4008664 |
| O | -5.2515341 | 0.6852524  | -3.8279744 |
| O | -5.0074821 | -0.9606906 | -1.9486254 |
| H | -2.4077621 | -0.1656576 | -1.9198934 |

Zero-point correction= 0.667544 (Hartree/Particle)

Thermal correction to Energy= 0.717436

Thermal correction to Enthalpy= 0.718381

Thermal correction to Gibbs Free Energy= 0.580595

Sum of electronic and zero-point Energies= -3051.424369

Sum of electronic and thermal Energies= -3051.374477

Sum of electronic and thermal Enthalpies= -3051.373533

Sum of electronic and thermal Free Energies= -3051.511319

### **A-int8**

|   |            |           |           |
|---|------------|-----------|-----------|
| C | -1.9852766 | 2.7540145 | 1.6822360 |
| C | -1.5603936 | 2.8181385 | 3.0074510 |
| C | -0.5410026 | 1.9838925 | 3.4316040 |



|    |            |            |            |
|----|------------|------------|------------|
| C  | 0.0404144  | 1.0726955  | 2.5472030  |
| C  | -0.4092376 | 0.9761015  | 1.2167760  |
| C  | -1.4126456 | 1.8505975  | 0.7959620  |
| C  | 1.1563464  | 0.2462155  | 3.0559750  |
| C  | 1.9039314  | -0.5367375 | 2.0356450  |
| C  | 1.4409634  | -0.6653725 | 0.7541070  |
| C  | 0.1412084  | -0.0959625 | 0.2919540  |
| C  | 0.1283834  | 0.3068635  | -1.1762990 |
| C  | -1.2088106 | -0.0486155 | -1.7277080 |
| N  | -1.8075586 | -0.8644465 | -0.7953160 |
| C  | -0.8430996 | -1.3437345 | 0.1696150  |
| C  | 1.1690984  | 0.7560345  | -1.8844930 |
| N  | -0.9768806 | -2.9376045 | 2.0499170  |
| C  | -1.4441386 | -1.7793005 | 1.4939710  |
| O  | -2.2563276 | -1.0813945 | 2.0823040  |
| O  | -1.7208936 | 0.2911955  | -2.7799570 |
| O  | 1.4958764  | 0.2175655  | 4.2271770  |
| H  | -0.2413826 | -2.1592205 | -0.2597530 |
| Au | 3.2474184  | 1.0046045  | 0.9361780  |
| C  | 1.2146304  | 1.0125315  | -3.3470410 |
| C  | -0.4383856 | -4.1930095 | 1.4551400  |
| C  | 1.0327704  | -4.0759675 | 1.0632770  |
| C  | -1.2909256 | -4.6474035 | 0.2716040  |
| C  | -0.5538376 | -5.2292935 | 2.5709960  |
| C  | -5.4850216 | 1.2976085  | 0.2060210  |

|   |            |            |            |
|---|------------|------------|------------|
| C | -6.1918776 | 1.6175145  | -0.9581360 |
| C | -5.9001686 | 0.9547085  | -2.1490630 |
| C | -4.9043046 | -0.0199525 | -2.1607360 |
| C | -4.2057256 | -0.3558525 | -1.0082770 |
| C | -4.5053156 | 0.3208845  | 0.1806390  |
| C | -3.1358106 | -1.4158245 | -1.0361780 |
| O | -7.1342796 | 2.5864845  | -0.8281260 |
| C | -7.8683346 | 2.9400405  | -1.9722370 |
| H | -2.7785956 | 3.4094885  | 1.3295490  |
| H | -2.0184706 | 3.5220365  | 3.6977560  |
| H | -0.1636926 | 2.0096255  | 4.4511150  |
| H | -1.7784866 | 1.8234065  | -0.2272560 |
| H | 2.7268264  | -1.1601355 | 2.3939840  |
| H | 1.9625324  | -1.3184155 | 0.0450270  |
| H | -1.4223126 | -3.0656455 | 2.9535010  |
| H | 0.2362364  | 0.8916105  | -3.8148850 |
| H | 1.5897054  | 2.0242725  | -3.5493860 |
| H | 1.9333804  | 0.3168475  | -3.8009590 |
| H | 1.6257264  | -3.6951755 | 1.9029670  |
| H | 1.4181554  | -5.0680535 | 0.8003780  |
| H | 1.2115654  | -3.4359755 | 0.1921430  |
| H | -2.3408966 | -4.7546795 | 0.5710190  |
| H | -0.9365696 | -5.6202495 | -0.0893790 |
| H | -1.2428486 | -3.9527085 | -0.5752600 |
| H | -0.1789456 | -6.1983425 | 2.2256960  |

|   |            |            |            |
|---|------------|------------|------------|
| H | 0.0375034  | -4.9289935 | 3.4447320  |
| H | -1.5983436 | -5.3624215 | 2.8807320  |
| H | -5.7320416 | 1.8309835  | 1.1211930  |
| H | -6.4250626 | 1.1932155  | -3.0693520 |
| H | -4.6534346 | -0.5152505 | -3.0974980 |
| H | -3.9489216 | 0.0767395  | 1.0853230  |
| H | -3.1424286 | -1.9274765 | -2.0098960 |
| H | -3.3216176 | -2.1712885 | -0.2625460 |
| H | -8.5673126 | 3.7215455  | -1.6662520 |
| H | -8.4378836 | 2.0877665  | -2.3710440 |
| H | -7.2192456 | 3.3328135  | -2.7686230 |
| P | 4.7738084  | 2.6699945  | 0.3353670  |
| C | 5.0261434  | 3.9796645  | 1.5794490  |
| H | 5.3551894  | 3.5311365  | 2.5215800  |
| H | 5.7825534  | 4.6939105  | 1.2331060  |
| H | 4.0828014  | 4.5044985  | 1.7573180  |
| C | 4.3362654  | 3.5663995  | -1.1912400 |
| H | 5.0843924  | 4.3401125  | -1.4008610 |
| H | 4.3007404  | 2.8598395  | -2.0256680 |
| H | 3.3516444  | 4.0303545  | -1.0764070 |
| C | 6.4254854  | 1.9701765  | 0.0366590  |
| H | 7.1260844  | 2.7561725  | -0.2688690 |
| H | 6.7828784  | 1.4892885  | 0.9523530  |
| H | 6.3583674  | 1.2010475  | -0.7383550 |
| H | 2.1188234  | 0.8963555  | -1.3592040 |

|   |           |            |            |
|---|-----------|------------|------------|
| C | 4.9236834 | -0.5944805 | -2.5595210 |
| F | 6.2332044 | -0.3631785 | -2.4807600 |
| F | 4.3051764 | 0.5960125  | -2.3823250 |
| F | 4.6372364 | -1.0159845 | -3.7786740 |
| S | 4.3826594 | -1.7951285 | -1.2769560 |
| O | 5.2201434 | -2.9598265 | -1.5161440 |
| O | 2.9438184 | -1.9331815 | -1.5710020 |
| O | 4.6649764 | -1.0467265 | -0.0250580 |

Zero-point correction= 0.674286 (Hartree/Particle)

Thermal correction to Energy= 0.724174

Thermal correction to Enthalpy= 0.725118

Thermal correction to Gibbs Free Energy= 0.588331

Sum of electronic and zero-point Energies= -3051.450546

Sum of electronic and thermal Energies= -3051.400658

Sum of electronic and thermal Enthalpies= -3051.399714

Sum of electronic and thermal Free Energies= -3051.536501

#### **A-ts7**

|   |            |           |            |
|---|------------|-----------|------------|
| C | -1.0147162 | 0.3327170 | 3.0890079  |
| C | -1.4613772 | 1.0813820 | 1.9966009  |
| C | 0.4309808  | 0.2430560 | 3.4364749  |
| C | 1.3963218  | 0.8653830 | 2.4945779  |
| C | 0.9249998  | 1.8133630 | 1.5653679  |
| C | -0.4804102 | 1.7182360 | 1.0092939  |
| C | -1.0058092 | 3.0475270 | 0.4988069  |
| C | -1.6310702 | 2.8333980 | -0.8335591 |

|    |            |            |            |
|----|------------|------------|------------|
| N  | -1.3719092 | 1.5251300  | -1.1834371 |
| C  | -0.4773632 | 0.8353860  | -0.2784301 |
| C  | -0.9454532 | 4.2038860  | 1.1689719  |
| N  | 1.8992668  | 1.5382830  | -0.3483241 |
| C  | 0.8946178  | 0.7158120  | -0.9415231 |
| O  | 1.0485928  | 0.0136040  | -1.9150831 |
| O  | -2.2822662 | 3.6088110  | -1.5112701 |
| O  | 0.7991818  | -0.2751870 | 4.4802509  |
| Au | 1.6023388  | -1.1789290 | 1.4636569  |
| C  | -1.4255312 | 5.5318570  | 0.7029439  |
| C  | -2.2727992 | -2.8559990 | -2.5128491 |
| C  | -3.2796392 | -3.0573040 | -1.5651561 |
| C  | -3.8639192 | -1.9572570 | -0.9327411 |
| C  | -3.4204122 | -0.6755710 | -1.2468461 |
| C  | -2.3965492 | -0.4614660 | -2.1667881 |
| C  | -1.8328232 | -1.5731200 | -2.7981461 |
| C  | -1.8647872 | 0.9235870  | -2.4126441 |
| O  | -3.5983972 | -4.3498640 | -1.3088391 |
| C  | -4.5883522 | -4.6012510 | -0.3401731 |
| H  | -1.8816982 | 5.4722630  | -0.2866751 |
| H  | -2.1566962 | 5.9420890  | 1.4107589  |
| H  | -0.5909232 | 6.2447770  | 0.6780799  |
| H  | -1.8365282 | -3.7279710 | -2.9950981 |
| H  | -4.6518642 | -2.0837200 | -0.1958741 |
| H  | -3.8705342 | 0.1798660  | -0.7436081 |

|   |            |            |            |
|---|------------|------------|------------|
| H | -1.0241252 | -1.4267770 | -3.5133961 |
| H | -2.6363112 | 1.6127090  | -2.7797671 |
| H | -1.0645982 | 0.8903670  | -3.1667321 |
| H | -4.6946512 | -5.6859210 | -0.2777701 |
| H | -5.5555922 | -4.1633520 | -0.6239121 |
| H | -4.2976592 | -4.2109890 | 0.6468889  |
| P | 0.9648288  | -3.2061500 | 0.5058179  |
| C | 1.8059178  | -4.7036170 | 1.1170649  |
| H | 1.6701638  | -4.7858380 | 2.1996059  |
| H | 1.3965408  | -5.5952540 | 0.6274379  |
| H | 2.8762938  | -4.6279270 | 0.9055929  |
| C | 1.1458408  | -3.2615830 | -1.3029071 |
| H | 0.7610538  | -4.2116600 | -1.6934121 |
| H | 0.5914268  | -2.4249430 | -1.7421651 |
| H | 2.2014858  | -3.1452850 | -1.5587801 |
| C | -0.8108652 | -3.5193110 | 0.8046779  |
| H | -1.1470512 | -4.4297270 | 0.2910159  |
| H | -0.9825602 | -3.6112150 | 1.8825059  |
| H | -1.3983632 | -2.6688370 | 0.4343499  |
| H | -0.8494262 | -0.1821620 | -0.0822141 |
| H | 1.3942938  | 2.7933280  | 1.5300409  |
| C | 2.5344928  | 2.6062970  | -1.2207241 |
| C | 1.4580258  | 3.4817500  | -1.8422791 |
| C | 3.4245708  | 3.4158170  | -0.2861991 |
| C | 3.3911998  | 1.9635280  | -2.3085961 |

|   |            |            |            |
|---|------------|------------|------------|
| H | 0.7976338  | 2.9111940  | -2.5099711 |
| H | 0.8450418  | 3.9839160  | -1.0835311 |
| H | 1.9376508  | 4.2563970  | -2.4509151 |
| H | 4.1477288  | 2.7652150  | 0.2213949  |
| H | 3.9896918  | 4.1524040  | -0.8689241 |
| H | 2.8371718  | 3.9640710  | 0.4618619  |
| H | 3.8429788  | 2.7597850  | -2.9137241 |
| H | 4.2047038  | 1.3742690  | -1.8704861 |
| H | 2.7968628  | 1.3220200  | -2.9656631 |
| H | -0.4827302 | 4.1774660  | 2.1611009  |
| H | 2.3742048  | 1.0532940  | 2.9399559  |
| H | 2.6806898  | 0.9448110  | 0.0005989  |
| C | -1.9261612 | -0.3156810 | 3.9247139  |
| C | -2.8371882 | 1.1788940  | 1.7735519  |
| H | -1.5238392 | -0.8637580 | 4.7735669  |
| H | -3.2168932 | 1.7940720  | 0.9603429  |
| C | -3.7401922 | 0.5177680  | 2.5972649  |
| C | -3.2868002 | -0.2401440 | 3.6746349  |
| H | -4.8068502 | 0.6111290  | 2.4034979  |
| H | -3.9943882 | -0.7498640 | 4.3239869  |
| C | 4.7306058  | -1.6471820 | -0.7871591 |
| F | 3.7953008  | -1.1734540 | -1.6157111 |
| F | 4.2184628  | -2.7366460 | -0.1895211 |
| F | 5.7765498  | -2.0257730 | -1.5000341 |
| S | 5.1998338  | -0.3793920 | 0.4606069  |

|   |           |            |            |
|---|-----------|------------|------------|
| O | 5.8166478 | 0.6734570  | -0.3453541 |
| O | 6.0223108 | -1.1073150 | 1.4128099  |
| O | 3.8515658 | 0.0230210  | 0.9872319  |

Zero-point correction= 0.672483 (Hartree/Particle)

Thermal correction to Energy= 0.721108

Thermal correction to Enthalpy= 0.722052

Thermal correction to Gibbs Free Energy= 0.590449

Sum of electronic and zero-point Energies= -3051.430531

Sum of electronic and thermal Energies= -3051.381906

Sum of electronic and thermal Enthalpies= -3051.380961

Sum of electronic and thermal Free Energies= -3051.512565

#### **A-int9**

|   |            |           |            |
|---|------------|-----------|------------|
| C | -0.7063043 | 1.3182932 | 3.1504839  |
| C | -1.3128563 | 1.4137202 | 1.8959079  |
| C | 0.7814197  | 1.3589842 | 3.2997949  |
| C | 1.5438097  | 1.2107742 | 2.0484849  |
| C | 0.9872807  | 1.9945582 | 0.8769479  |
| C | -0.5354343 | 1.7737042 | 0.6369429  |
| C | -1.2223773 | 2.9593072 | -0.0296101 |
| C | -1.7935813 | 2.5273632 | -1.3299081 |
| N | -1.4529703 | 1.1968302 | -1.4868451 |
| C | -0.6045103 | 0.6739352 | -0.4400371 |
| C | -1.3334123 | 4.1753152 | 0.5170149  |
| N | 1.7054887  | 1.5242562 | -0.3972341 |
| C | 0.7967137  | 0.4950872 | -0.9879711 |



|    |            |            |            |
|----|------------|------------|------------|
| O  | 1.1541637  | -0.2856948 | -1.8202481 |
| O  | -2.4469823 | 3.1616272  | -2.1389121 |
| O  | 1.2922247  | 1.4013922  | 4.4096799  |
| Au | 1.4259627  | -0.9205658 | 1.6675409  |
| C  | -1.9785223 | 5.3726892  | -0.0827551 |
| C  | -2.0682163 | -3.3638638 | -2.1745551 |
| C  | -3.1493523 | -3.4759358 | -1.2964511 |
| C  | -3.8351723 | -2.3266158 | -0.8941621 |
| C  | -3.4207953 | -1.0843238 | -1.3655781 |
| C  | -2.3303143 | -0.9563018 | -2.2235581 |
| C  | -1.6617793 | -2.1165248 | -2.6217631 |
| C  | -1.8438813 | 0.4038952  | -2.6412281 |
| O  | -3.4417433 | -4.7303488 | -0.8782011 |
| C  | -4.4926153 | -4.8867478 | 0.0455619  |
| H  | -2.4091853 | 5.1539822  | -1.0611981 |
| H  | -2.7639643 | 5.7542602  | 0.5815859  |
| H  | -1.2447333 | 6.1837702  | -0.1827131 |
| H  | -1.5526483 | -4.2726728 | -2.4766681 |
| H  | -4.6846643 | -2.3870348 | -0.2204901 |
| H  | -3.9557343 | -0.1884728 | -1.0487481 |
| H  | -0.8019473 | -2.0373018 | -3.2863581 |
| H  | -2.6185953 | 0.9938732  | -3.1477121 |
| H  | -0.9972773 | 0.3047042  | -3.3380941 |
| H  | -4.5577203 | -5.9540928 | 0.2648059  |
| H  | -5.4526513 | -4.5484638 | -0.3687991 |

|   |            |            |            |
|---|------------|------------|------------|
| H | -4.2946563 | -4.3391008 | 0.9791569  |
| P | 1.0007597  | -3.1722278 | 1.0646049  |
| C | 1.9125127  | -4.4987868 | 1.9262059  |
| H | 1.7420397  | -4.4275108 | 3.0045469  |
| H | 1.5877667  | -5.4832268 | 1.5686499  |
| H | 2.9826917  | -4.3756888 | 1.7344279  |
| C | 1.2630167  | -3.5257688 | -0.7051331 |
| H | 0.9214897  | -4.5407968 | -0.9431421 |
| H | 0.7015557  | -2.7976178 | -1.3019041 |
| H | 2.3225547  | -3.4186108 | -0.9472481 |
| C | -0.7638503 | -3.5891048 | 1.3170049  |
| H | -0.9886743 | -4.5999448 | 0.9527489  |
| H | -1.0122993 | -3.5132208 | 2.3804419  |
| H | -1.3828333 | -2.8697498 | 0.7642099  |
| H | -0.9740853 | -0.2959038 | -0.0742051 |
| H | 1.1886457  | 3.0700512  | 0.9685429  |
| C | 2.3208297  | 2.5752972  | -1.3996741 |
| C | 1.2472177  | 3.4554422  | -2.0055801 |
| C | 3.3269517  | 3.3775132  | -0.5870631 |
| C | 3.0413817  | 1.8077932  | -2.5003981 |
| H | 0.5069467  | 2.8739312  | -2.5713311 |
| H | 0.7278787  | 4.0752432  | -1.2688741 |
| H | 1.7364177  | 4.1268292  | -2.7202011 |
| H | 4.0839897  | 2.7229832  | -0.1423521 |
| H | 3.8365047  | 4.0692662  | -1.2666091 |

|   |            |            |            |
|---|------------|------------|------------|
| H | 2.8570877  | 3.9791702  | 0.1986849  |
| H | 3.5983307  | 2.5437192  | -3.0914821 |
| H | 3.7726047  | 1.0920202  | -2.1111481 |
| H | 2.3464387  | 1.2951552  | -3.1705961 |
| H | -0.8903953 | 4.3082642  | 1.5101349  |
| H | 2.6041967  | 1.4296592  | 2.2109049  |
| H | 2.5836387  | 0.9975262  | -0.0952321 |
| C | -1.4783393 | 1.0787822  | 4.2890589  |
| C | -2.6943153 | 1.2219962  | 1.8020779  |
| H | -0.9553073 | 1.0257142  | 5.2412339  |
| H | -3.1876083 | 1.3067782  | 0.8340669  |
| C | -3.4537303 | 0.9532642  | 2.9326569  |
| C | -2.8475123 | 0.8956092  | 4.1871639  |
| H | -4.5272693 | 0.8062742  | 2.8365509  |
| H | -3.4444753 | 0.7030492  | 5.0754119  |
| C | 4.7372757  | -1.7957348 | -0.5944051 |
| F | 3.7591857  | -1.6519208 | -1.4936861 |
| F | 4.2593067  | -2.5613838 | 0.3984939  |
| F | 5.7432767  | -2.4389558 | -1.1622211 |
| S | 5.2617647  | -0.1569548 | 0.0413819  |
| O | 5.7296487  | 0.5411422  | -1.1562921 |
| O | 6.2222867  | -0.4651218 | 1.0869619  |
| O | 3.9520377  | 0.3674942  | 0.5484969  |

Zero-point correction= 0.675444 (Hartree/Particle)

Thermal correction to Energy= 0.723810

Thermal correction to Enthalpy= 0.724754

Thermal correction to Gibbs Free Energy= 0.594017

Sum of electronic and zero-point Energies= -3051.456908

Sum of electronic and thermal Energies= -3051.408542

Sum of electronic and thermal Enthalpies= -3051.407598

Sum of electronic and thermal Free Energies= -3051.538334

**A-ts8**

|    |            |            |            |
|----|------------|------------|------------|
| C  | 0.8856568  | -0.7369663 | 2.9460918  |
| C  | 1.6504548  | -1.1727943 | 1.8551748  |
| C  | -0.5940202 | -0.8986283 | 3.0059488  |
| C  | -1.2658472 | -1.4504733 | 1.7954448  |
| C  | -0.4290592 | -2.2793283 | 0.8254278  |
| C  | 1.0189818  | -1.7985403 | 0.6228308  |
| C  | 1.9169408  | -2.8721533 | 0.0190178  |
| C  | 2.6303858  | -2.2899823 | -1.1529502 |
| N  | 2.0875648  | -1.0394763 | -1.3571812 |
| C  | 0.9203488  | -0.7993103 | -0.5458522 |
| C  | 2.0728628  | -4.1110803 | 0.4985988  |
| N  | -1.1468912 | -2.0157593 | -0.4753092 |
| C  | -0.3391602 | -1.1834583 | -1.3040552 |
| O  | -0.6094222 | -0.8052693 | -2.4155972 |
| O  | 3.5400688  | -2.7630373 | -1.8111972 |
| O  | -1.2233672 | -0.5751283 | 4.0025328  |
| Au | -1.8549802 | 0.7238617  | 1.1482488  |
| C  | 2.9401688  | -5.1850283 | -0.0533612 |

|   |            |            |            |
|---|------------|------------|------------|
| C | 1.6486058  | 3.5215147  | -2.2743742 |
| C | 2.4995168  | 3.9480277  | -1.2518812 |
| C | 3.3524198  | 3.0312447  | -0.6323822 |
| C | 3.3388808  | 1.7009497  | -1.0424182 |
| C | 2.4939428  | 1.2612317  | -2.0596522 |
| C | 1.6427938  | 2.1904907  | -2.6631062 |
| C | 2.4704908  | -0.1843963 | -2.4677772 |
| O | 2.3992978  | 5.2565257  | -0.9085622 |
| C | 3.2358288  | 5.7314367  | 0.1196948  |
| H | 3.4994338  | -4.8445473 | -0.9259952 |
| H | 3.6446418  | -5.5322453 | 0.7128778  |
| H | 2.3314778  | -6.0571053 | -0.3262452 |
| H | 0.9939428  | 4.2545677  | -2.7405542 |
| H | 4.0212798  | 3.3377557  | 0.1663718  |
| H | 3.9974938  | 0.9839247  | -0.5518072 |
| H | 0.9635438  | 1.8584837  | -3.4481372 |
| H | 3.4592288  | -0.5422933 | -2.7824292 |
| H | 1.7821298  | -0.3287263 | -3.3118582 |
| H | 3.0162398  | 6.7947377  | 0.2332748  |
| H | 4.2984758  | 5.6107957  | -0.1327042 |
| H | 3.0362628  | 5.2195897  | 1.0733788  |
| P | -1.6168152 | 2.9878787  | 0.6264878  |
| C | -2.7327142 | 4.1797567  | 1.4348528  |
| H | -2.6096802 | 4.1174377  | 2.5202538  |
| H | -2.5043852 | 5.1980667  | 1.0984468  |

|   |            |            |            |
|---|------------|------------|------------|
| H | -3.7683642 | 3.9328727  | 1.1879238  |
| C | -1.8007392 | 3.2835807  | -1.1614872 |
| H | -1.5886692 | 4.3332447  | -1.3987562 |
| H | -1.0978342 | 2.6357497  | -1.6985622 |
| H | -2.8176792 | 3.0232077  | -1.4664942 |
| C | 0.0607618  | 3.5870077  | 1.0263958  |
| H | 0.2215248  | 4.6026977  | 0.6407978  |
| H | 0.1993938  | 3.5723227  | 2.1126668  |
| H | 0.8005428  | 2.9152627  | 0.5737318  |
| H | 0.8542478  | 0.2544977  | -0.2277662 |
| H | -0.4552822 | -3.3500813 | 1.0550338  |
| C | -2.0729442 | -3.0711653 | -1.0740662 |
| C | -1.1965582 | -4.1753913 | -1.6519262 |
| C | -2.9810992 | -3.6017733 | 0.0280108  |
| C | -2.9421102 | -2.4423733 | -2.1559332 |
| H | -0.5171762 | -3.7845163 | -2.4201392 |
| H | -0.5975292 | -4.6774013 | -0.8809972 |
| H | -1.8364552 | -4.9305253 | -2.1228712 |
| H | -3.6304062 | -2.8098923 | 0.4195278  |
| H | -3.6297492 | -4.3676383 | -0.4105532 |
| H | -2.4302962 | -4.0787953 | 0.8480778  |
| H | -3.7253192 | -3.1626813 | -2.4171552 |
| H | -3.4515362 | -1.5501503 | -1.7827132 |
| H | -2.3748362 | -2.1921843 | -3.0533352 |
| H | 1.4956768  | -4.3729643 | 1.3920478  |

|   |            |            |            |
|---|------------|------------|------------|
| H | -2.1933252 | -1.9517453 | 2.0915098  |
| H | -1.7359402 | -1.0975463 | 0.4129148  |
| C | 1.5037898  | -0.1286303 | 4.0429608  |
| C | 3.0342428  | -0.9739023 | 1.8932378  |
| H | 0.8656128  | 0.1728737  | 4.8701818  |
| H | 3.6565088  | -1.3270003 | 1.0735568  |
| C | 3.6383088  | -0.3524353 | 2.9783288  |
| C | 2.8730548  | 0.0727267  | 4.0623288  |
| H | 4.7171418  | -0.2134923 | 2.9824458  |
| H | 3.3471148  | 0.5485707  | 4.9171918  |
| C | -5.0087032 | 1.0645917  | -0.8710042 |
| F | -3.9102482 | 0.8344737  | -1.6084512 |
| F | -4.7670822 | 2.1850797  | -0.1651222 |
| F | -6.0135432 | 1.3106827  | -1.6923892 |
| S | -5.3787682 | -0.3520923 | 0.2458608  |
| O | -5.6566992 | -1.4412313 | -0.6903502 |
| O | -6.4726352 | 0.1504387  | 1.0651978  |
| O | -4.0794102 | -0.5168193 | 0.9605728  |

Zero-point correction= 0.668033 (Hartree/Particle)

Thermal correction to Energy= 0.716955

Thermal correction to Enthalpy= 0.717899

Thermal correction to Gibbs Free Energy= 0.584216

Sum of electronic and zero-point Energies= -3051.407973

Sum of electronic and thermal Energies= -3051.359051

Sum of electronic and thermal Enthalpies= -3051.358107

Sum of electronic and thermal Free Energies= -3051.491790

**A-ts9**

|    |            |            |            |
|----|------------|------------|------------|
| C  | -1.0475529 | -2.0284647 | -0.6144175 |
| C  | -1.2133539 | -1.2546617 | 0.5426425  |
| C  | -0.0791139 | -1.5946467 | -1.6665405 |
| C  | 0.9745191  | -0.6637267 | -1.1990175 |
| C  | 0.7587211  | 0.1871083  | -0.0842545 |
| C  | -0.6140559 | 0.1499883  | 0.5476355  |
| C  | -0.7250309 | 0.8376463  | 1.8836025  |
| C  | -1.9983099 | 1.6117613  | 1.8943225  |
| N  | -2.4312989 | 1.6733893  | 0.5884835  |
| C  | -1.5697359 | 1.0017973  | -0.3555455 |
| C  | 0.1633101  | 0.7515993  | 2.8793805  |
| N  | 0.5481161  | 2.1592373  | -0.8375505 |
| C  | -0.8261189 | 2.0136323  | -1.2233515 |
| O  | -1.3685729 | 2.6197383  | -2.1119405 |
| O  | -2.5914949 | 2.0956043  | 2.8434415  |
| O  | -0.0781869 | -2.0906747 | -2.7813315 |
| Au | 2.4826981  | -2.0002207 | -0.2468145 |
| C  | 0.0994221  | 1.4557113  | 4.1883325  |
| C  | -5.4482439 | 0.0463773  | -2.4498945 |
| C  | -5.7591089 | -1.1026067 | -1.7180775 |
| C  | -5.4692079 | -1.1555087 | -0.3524545 |
| C  | -4.8653489 | -0.0626257 | 0.2586595  |
| C  | -4.5348449 | 1.0821333  | -0.4630105 |



|   |            |            |            |
|---|------------|------------|------------|
| C | -4.8324589 | 1.1200343  | -1.8273145 |
| C | -3.7426339 | 2.1746953  | 0.1981295  |
| O | -6.3307609 | -2.1118817 | -2.4178305 |
| C | -6.5668859 | -3.3235097 | -1.7459815 |
| H | -0.8137739 | 2.0462523  | 4.2838905  |
| H | 0.1450331  | 0.7357823  | 5.0149915  |
| H | 0.9733131  | 2.1108623  | 4.3034175  |
| H | -5.6769369 | 0.0577473  | -3.5122795 |
| H | -5.6960829 | -2.0393617 | 0.2369495  |
| H | -4.6251259 | -0.1080717 | 1.3220385  |
| H | -4.5533559 | 1.9959263  | -2.4119585 |
| H | -4.2033429 | 2.5297183  | 1.1282045  |
| H | -3.6269359 | 3.0350203  | -0.4759345 |
| H | -6.9769679 | -4.0147047 | -2.4851275 |
| H | -7.2929829 | -3.2039017 | -0.9287255 |
| H | -5.6369399 | -3.7454847 | -1.3360585 |
| P | 4.4409631  | -3.0991367 | 0.4025315  |
| C | 5.4130521  | -3.5920237 | -1.0554825 |
| H | 5.5631211  | -2.6947297 | -1.6653805 |
| H | 6.3796041  | -4.0092507 | -0.7487185 |
| H | 4.8606291  | -4.3328187 | -1.6412155 |
| C | 4.3307011  | -4.6043477 | 1.4315465  |
| H | 5.3328781  | -4.9962567 | 1.6425765  |
| H | 3.8276861  | -4.3710607 | 2.3747245  |
| H | 3.7470831  | -5.3668047 | 0.9069725  |

|   |            |            |            |
|---|------------|------------|------------|
| C | 5.5435371  | -1.9796117 | 1.3232385  |
| H | 6.4989941  | -2.4756187 | 1.5321555  |
| H | 5.7003211  | -1.0786207 | 0.7210275  |
| H | 5.0672871  | -1.6787537 | 2.2611875  |
| H | -2.1768289 | 0.3768123  | -1.0281915 |
| H | 1.6108191  | 0.5928593  | 0.4558785  |
| C | 0.9477421  | 3.5106003  | -0.2390505 |
| C | -0.2274769 | 4.1857413  | 0.4552715  |
| C | 2.0570191  | 3.2705383  | 0.7733805  |
| C | 1.4536051  | 4.3752703  | -1.3891755 |
| H | -1.0675689 | 4.3778553  | -0.2215365 |
| H | -0.5830439 | 3.6154543  | 1.3215975  |
| H | 0.1166341  | 5.1558083  | 0.8310725  |
| H | 2.9064621  | 2.7396263  | 0.3373645  |
| H | 2.4093151  | 4.2391093  | 1.1490575  |
| H | 1.6893841  | 2.6903903  | 1.6296305  |
| H | 1.7389151  | 5.3650993  | -1.0123895 |
| H | 2.3383761  | 3.9171283  | -1.8493515 |
| H | 0.6776901  | 4.5045653  | -2.1524915 |
| H | 1.0444821  | 0.1235193  | 2.7054465  |
| H | 1.1863821  | 1.9942603  | -1.6267275 |
| C | -1.7278329 | -3.2317607 | -0.7632205 |
| C | -2.0465439 | -1.7166877 | 1.5553255  |
| H | -1.5738409 | -3.7930157 | -1.6822615 |
| H | -2.1831499 | -1.1287387 | 2.4610845  |

|   |            |            |            |
|---|------------|------------|------------|
| C | -2.7090569 | -2.9358797 | 1.4117105  |
| C | -2.5631739 | -3.6879977 | 0.2510295  |
| H | -3.3498359 | -3.2924217 | 2.2155515  |
| H | -3.0890489 | -4.6341087 | 0.1429345  |
| C | 5.6398261  | 1.9398423  | -1.2897605 |
| F | 5.2571201  | 3.1162413  | -0.7992155 |
| F | 6.0737461  | 2.1153143  | -2.5281795 |
| F | 6.6390251  | 1.4736183  | -0.5464325 |
| S | 4.2388501  | 0.7580253  | -1.2556095 |
| O | 3.9337241  | 0.6469563  | 0.1882835  |
| O | 4.7908781  | -0.4666607 | -1.8516355 |
| O | 3.1925531  | 1.4403473  | -2.0427365 |
| H | 1.6986301  | -0.3503897 | -1.9605255 |

Zero-point correction= 0.672500 (Hartree/Particle)

Thermal correction to Energy= 0.721711

Thermal correction to Enthalpy= 0.722655

Thermal correction to Gibbs Free Energy= 0.587173

Sum of electronic and zero-point Energies= -3051.431293

Sum of electronic and thermal Energies= -3051.382082

Sum of electronic and thermal Enthalpies= -3051.381138

Sum of electronic and thermal Free Energies= -3051.516620

### **A-int10**

|   |            |            |            |
|---|------------|------------|------------|
| C | -0.4998859 | -2.4584815 | -1.8482939 |
| C | -1.4092409 | -1.8173475 | -1.0051969 |
| C | 0.9628011  | -2.1825575 | -1.7701739 |

|    |            |            |            |
|----|------------|------------|------------|
| C  | 1.3895231  | -1.0053905 | -0.9460329 |
| C  | 0.5793661  | -0.8271815 | 0.3295201  |
| C  | -0.9720899 | -1.0237065 | 0.2113131  |
| C  | -1.5720469 | -1.6789815 | 1.4498421  |
| C  | -2.5639209 | -0.7574055 | 2.0561711  |
| N  | -2.5126449 | 0.4125585  | 1.3260201  |
| C  | -1.5772019 | 0.3886275  | 0.2226501  |
| C  | -1.2718739 | -2.9109075 | 1.8768101  |
| N  | 0.7944161  | 0.5975475  | 0.8473141  |
| C  | -0.4594409 | 1.3540015  | 0.5321861  |
| O  | -0.5212989 | 2.5439285  | 0.5672481  |
| O  | -3.3068729 | -0.9360875 | 3.0057761  |
| O  | 1.7381661  | -2.8177305 | -2.4664449 |
| Au | 3.5199051  | -1.0039605 | -0.7664109 |
| C  | -1.8201099 | -3.6035225 | 3.0730051  |
| C  | -5.0057719 | 2.8241615  | -1.6601619 |
| C  | -6.0471249 | 1.9100285  | -1.8436129 |
| C  | -6.2412559 | 0.8817795  | -0.9172849 |
| C  | -5.3944829 | 0.7855025  | 0.1825261  |
| C  | -4.3578299 | 1.6953985  | 0.3788461  |
| C  | -4.1704209 | 2.7124145  | -0.5608459 |
| C  | -3.4232409 | 1.5269595  | 1.5423741  |
| O  | -6.8097069 | 2.1010935  | -2.9455539 |
| C  | -7.8675309 | 1.2045235  | -3.1797339 |
| H  | -2.5434689 | -2.9823675 | 3.6037711  |

|   |            |            |            |
|---|------------|------------|------------|
| H | -2.3023219 | -4.5439015 | 2.7772871  |
| H | -1.0065219 | -3.8805665 | 3.7560951  |
| H | -4.8744709 | 3.6098625  | -2.3994829 |
| H | -7.0468769 | 0.1636075  | -1.0379899 |
| H | -5.5419839 | -0.0131415 | 0.9114451  |
| H | -3.3517049 | 3.4194975  | -0.4260449 |
| H | -3.9602059 | 1.2829495  | 2.4667811  |
| H | -2.8425639 | 2.4440215  | 1.7143031  |
| H | -8.3481409 | 1.5260995  | -4.1057069 |
| H | -8.6072359 | 1.2264045  | -2.3665879 |
| H | -7.5064299 | 0.1732985  | -3.3040289 |
| P | 5.8859451  | -0.9602285 | -0.7100499 |
| C | 6.6366411  | -0.3043895 | -2.2368039 |
| H | 6.2531551  | 0.7085995  | -2.3933839 |
| H | 7.7304211  | -0.2952225 | -2.1560619 |
| H | 6.3358671  | -0.9265775 | -3.0856109 |
| C | 6.6897201  | -2.5937375 | -0.5058969 |
| H | 7.7820331  | -2.4956355 | -0.5230339 |
| H | 6.3814691  | -3.0395825 | 0.4450261  |
| H | 6.3728821  | -3.2589785 | -1.3153039 |
| C | 6.6277621  | 0.0482935  | 0.6170711  |
| H | 7.7208631  | 0.0591825  | 0.5279081  |
| H | 6.2237991  | 1.0642715  | 0.5507151  |
| H | 6.3451431  | -0.3691665 | 1.5895641  |
| H | -2.0639109 | 0.6833945  | -0.7200979 |

|   |            |            |            |
|---|------------|------------|------------|
| H | 0.9410351  | -1.5080085 | 1.1064061  |
| C | 1.3208051  | 0.8047815  | 2.3196661  |
| C | 0.2777611  | 0.3235445  | 3.3099581  |
| C | 2.6224371  | 0.0294795  | 2.4500171  |
| C | 1.6039081  | 2.2877135  | 2.5256981  |
| H | -0.6640179 | 0.8806795  | 3.2203661  |
| H | 0.0664021  | -0.7479275 | 3.2236441  |
| H | 0.6638101  | 0.5046955  | 4.3189501  |
| H | 3.3842431  | 0.4207295  | 1.7644211  |
| H | 2.9864511  | 0.1720245  | 3.4742961  |
| H | 2.5053251  | -1.0481965 | 2.2916501  |
| H | 2.0833051  | 2.3872175  | 3.5063841  |
| H | 2.2998171  | 2.6788375  | 1.7778611  |
| H | 0.6962201  | 2.8945115  | 2.5305141  |
| H | -0.5417459 | -3.4719875 | 1.2827321  |
| H | 1.5220731  | 1.0851875  | 0.2345121  |
| C | -0.9649039 | -3.2786895 | -2.8832929 |
| C | -2.7791269 | -1.9723005 | -1.2426879 |
| H | -0.2199829 | -3.7586465 | -3.5132149 |
| H | -3.5031349 | -1.4695285 | -0.6001009 |
| C | -3.2312369 | -2.7640065 | -2.2872369 |
| C | -2.3213369 | -3.4364755 | -3.1040609 |
| H | -4.3003759 | -2.8629495 | -2.4611609 |
| H | -2.6760409 | -4.0664625 | -3.9160689 |
| C | 3.5857211  | 4.2929445  | -0.9661189 |

|   |           |            |            |
|---|-----------|------------|------------|
| F | 2.8798911 | 4.8057315  | 0.0371061  |
| F | 3.0186721 | 4.6419435  | -2.1114909 |
| F | 4.8133861 | 4.7947435  | -0.9232089 |
| S | 3.6511521 | 2.4671245  | -0.8138139 |
| O | 4.2505251 | 2.2478265  | 0.5140691  |
| O | 4.4414541 | 2.0278565  | -1.9626599 |
| O | 2.2047711 | 2.1094475  | -0.8652509 |
| H | 1.2126841 | -0.1330895 | -1.6036219 |

Zero-point correction= 0.674485 (Hartree/Particle)

Thermal correction to Energy= 0.723560

Thermal correction to Enthalpy= 0.724504

Thermal correction to Gibbs Free Energy= 0.588916

Sum of electronic and zero-point Energies= -3051.451442

Sum of electronic and thermal Energies= -3051.402367

Sum of electronic and thermal Enthalpies= -3051.401423

Sum of electronic and thermal Free Energies= -3051.537011

### **A-ts10**

|   |            |            |            |
|---|------------|------------|------------|
| C | -0.6573379 | -0.6773634 | -2.6807986 |
| C | -1.5223279 | -0.7907184 | -1.5734176 |
| C | 0.8298151  | -0.7021744 | -2.5345256 |
| C | 1.2127831  | -0.5218514 | -1.0933696 |
| C | 0.4600941  | -1.5191654 | -0.2166226 |
| C | -1.0222159 | -1.1796714 | -0.1898696 |
| C | -1.8996409 | -2.2440744 | 0.4482134  |
| C | -2.7669369 | -1.5788614 | 1.4673394  |

|    |            |            |            |
|----|------------|------------|------------|
| N  | -2.2634289 | -0.3152354 | 1.6380124  |
| C  | -1.0765339 | -0.0512084 | 0.8624194  |
| C  | -1.9207399 | -3.5367234 | 0.1069774  |
| N  | 1.0309041  | -1.2172654 | 1.1179944  |
| C  | 0.1542061  | -0.2781874 | 1.7529394  |
| O  | 0.2901721  | 0.1546136  | 2.8651234  |
| O  | -3.7620949 | -2.0169634 | 2.0230714  |
| O  | 1.5948811  | -0.7744514 | -3.4756886 |
| Au | 3.4257831  | -0.2042124 | -1.0197256 |
| C  | -2.7590489 | -4.6036924 | 0.7174444  |
| C  | -3.9268359 | 3.3192686  | -0.3204896 |
| C  | -5.1649229 | 2.8323806  | -0.7484166 |
| C  | -5.7144349 | 1.7011396  | -0.1412366 |
| C  | -5.0148169 | 1.0677606  | 0.8824834  |
| C  | -3.7779439 | 1.5417586  | 1.3159174  |
| C  | -3.2435959 | 2.6790016  | 0.7005914  |
| C  | -2.9872759 | 0.7498766  | 2.3205484  |
| O  | -5.7550279 | 3.5246136  | -1.7549026 |
| C  | -7.0021809 | 3.0741946  | -2.2171006 |
| H  | -3.4265179 | -4.1984924 | 1.4801684  |
| H  | -3.3588399 | -5.1050324 | -0.0525206 |
| H  | -2.1218449 | -5.3788944 | 1.1639044  |
| H  | -3.5224409 | 4.2017546  | -0.8091826 |
| H  | -6.6804479 | 1.3118656  | -0.4499676 |
| H  | -5.4312639 | 0.1744656  | 1.3479194  |



|   |            |            |            |
|---|------------|------------|------------|
| H | -2.2745029 | 3.0627926  | 1.0223824  |
| H | -3.6391399 | 0.2625036  | 3.0535614  |
| H | -2.2589089 | 1.3688476  | 2.8575164  |
| H | -7.3039769 | 3.7552856  | -3.0155536 |
| H | -7.7638339 | 3.0936176  | -1.4240626 |
| H | -6.9432989 | 2.0528336  | -2.6229256 |
| P | 5.6472331  | 0.5961576  | -1.0282456 |
| C | 5.8351361  | 2.0426766  | -2.1159406 |
| H | 5.0758161  | 2.7730406  | -1.8184576 |
| H | 6.8399491  | 2.4691596  | -2.0129716 |
| H | 5.6624251  | 1.7530456  | -3.1567996 |
| C | 7.0077681  | -0.5289824 | -1.4986886 |
| H | 7.9714971  | -0.0103394 | -1.4312276 |
| H | 7.0173011  | -1.3958304 | -0.8310106 |
| H | 6.8588511  | -0.8818604 | -2.5236206 |
| C | 6.0918021  | 1.1961596  | 0.6324934  |
| H | 7.0649851  | 1.7008076  | 0.6076544  |
| H | 5.3065501  | 1.8761236  | 0.9809354  |
| H | 6.1320601  | 0.3497276  | 1.3259454  |
| H | -1.0696809 | 0.9647486  | 0.4474554  |
| H | 0.6594781  | -2.5515034 | -0.5197126 |
| C | 1.7475331  | -2.2360564 | 1.9839534  |
| C | 0.7526471  | -2.9176074 | 2.9177864  |
| C | 2.4011991  | -3.2857954 | 1.0920844  |
| C | 2.8283381  | -1.4953344 | 2.7652044  |

|   |            |            |            |
|---|------------|------------|------------|
| H | 0.2963481  | -2.2052254 | 3.6115924  |
| H | -0.0431349 | -3.4149614 | 2.3473024  |
| H | 1.2741251  | -3.6797464 | 3.5089934  |
| H | 3.0309601  | -2.8371594 | 0.3115834  |
| H | 3.0483781  | -3.9095914 | 1.7187174  |
| H | 1.6692731  | -3.9538244 | 0.6215664  |
| H | 3.3629061  | -2.2122594 | 3.4004174  |
| H | 3.5439491  | -1.0174274 | 2.0841304  |
| H | 2.3998521  | -0.7103064 | 3.3908834  |
| H | -1.2481889 | -3.8496384 | -0.6997306 |
| H | 2.0307251  | -0.6128494 | 0.1457704  |
| C | -1.1725809 | -0.3930064 | -3.9492986 |
| C | -2.8850549 | -0.5591144 | -1.7686626 |
| H | -0.4692869 | -0.3205454 | -4.7756796 |
| H | -3.5742809 | -0.6246384 | -0.9273336 |
| C | -3.3801719 | -0.2364604 | -3.0253556 |
| C | -2.5282949 | -0.1731734 | -4.1263996 |
| H | -4.4434689 | -0.0379964 | -3.1427866 |
| H | -2.9207629 | 0.0652666  | -5.1116456 |
| C | 2.4772481  | 4.0938026  | 1.5194004  |
| F | 1.8493631  | 4.0084136  | 2.6832684  |
| F | 1.9619991  | 5.0997596  | 0.8253954  |
| F | 3.7649821  | 4.3483136  | 1.7460134  |
| S | 2.3225061  | 2.5241106  | 0.5873734  |
| O | 2.9756591  | 1.5367746  | 1.4684754  |

|   |           |           |            |
|---|-----------|-----------|------------|
| O | 3.0622121 | 2.7930026 | -0.6617846 |
| O | 0.8700571 | 2.3360886 | 0.4191614  |
| H | 0.8575141 | 0.4897176 | -0.8223536 |

Zero-point correction= 0.667635 (Hartree/Particle)

Thermal correction to Energy= 0.716875

Thermal correction to Enthalpy= 0.717819

Thermal correction to Gibbs Free Energy= 0.582431

Sum of electronic and zero-point Energies= -3051.406462

Sum of electronic and thermal Energies= -3051.357222

Sum of electronic and thermal Enthalpies= -3051.356278

Sum of electronic and thermal Free Energies= -3051.491666

#### **B-1**

|   |            |            |            |
|---|------------|------------|------------|
| C | 1.5647494  | 1.5569145  | 2.1586954  |
| C | 2.4000174  | 0.8126065  | 3.0149284  |
| C | 2.1885524  | -0.5361695 | 3.1638594  |
| C | 1.1386984  | -1.1849625 | 2.4692854  |
| C | 0.2638284  | -0.4339055 | 1.6218454  |
| C | 0.5318784  | 0.9498615  | 1.4845844  |
| C | 0.9226504  | -2.5810315 | 2.6454144  |
| C | -0.1490596 | -3.1967925 | 2.0434984  |
| C | -1.0130086 | -2.4436705 | 1.2299564  |
| C | -0.8355786 | -1.0980705 | 0.9789894  |
| C | -0.4485836 | -1.8434595 | -1.8926556 |
| C | -0.7663476 | -0.4181565 | -2.1452056 |
| N | -1.3581426 | 0.2697465  | -1.1346926 |

|    |            |            |            |
|----|------------|------------|------------|
| C  | -1.8694386 | -0.4532865 | 0.0633394  |
| C  | -0.2825756 | -3.0586055 | -1.9748966 |
| N  | -4.1590676 | 0.3482265  | 0.6358904  |
| C  | -2.8194266 | 0.4692575  | 0.8429844  |
| O  | -2.3787036 | 1.3125875  | 1.6072894  |
| O  | -0.4368476 | 0.0430765  | -3.2262066 |
| O  | 1.8179314  | -3.2342875 | 3.4179934  |
| H  | -2.4659336 | -1.2887225 | -0.3187756 |
| Au | 1.7090304  | -1.7793245 | -1.1177006 |
| C  | -0.1685076 | -4.5033025 | -2.0183086 |
| C  | -5.0245806 | -0.5730815 | -0.1405346 |
| C  | -4.9901246 | -1.9826285 | 0.4456524  |
| C  | -4.6727476 | -0.5732955 | -1.6268766 |
| C  | -6.4362056 | -0.0118925 | 0.0159364  |
| C  | 0.1417264  | 4.4949675  | 0.2731794  |
| C  | 1.3939884  | 4.4411435  | -0.3472816 |
| C  | 1.6166364  | 3.5221905  | -1.3758516 |
| C  | 0.5979404  | 2.6518035  | -1.7540686 |
| C  | -0.6440176 | 2.6760055  | -1.1196036 |
| C  | -0.8613296 | 3.6218015  | -0.1122196 |
| C  | -1.7115946 | 1.6765485  | -1.4694646 |
| O  | 2.3221974  | 5.3035265  | 0.1241074  |
| C  | 3.6021404  | 5.2816195  | -0.4597986 |
| H  | 1.7142744  | 2.6291885  | 2.0400754  |
| H  | 3.1937324  | 1.3066325  | 3.5702674  |

|   |            |            |            |
|---|------------|------------|------------|
| H | 2.8006254  | -1.1248375 | 3.8428104  |
| H | -0.1245646 | 1.5550855  | 0.8773824  |
| H | -0.3341486 | -4.2588955 | 2.1998714  |
| H | -1.8439046 | -2.9670805 | 0.7563934  |
| H | -4.6541136 | 1.0027525  | 1.2339334  |
| H | 1.5258914  | -4.1410805 | 3.5657374  |
| H | -1.0794806 | -4.9238005 | -2.4594046 |
| H | 0.6784484  | -4.8202445 | -2.6352106 |
| H | -0.0517086 | -4.9182415 | -1.0105646 |
| H | -5.2604296 | -1.9640405 | 1.5072404  |
| H | -5.7054176 | -2.6261725 | -0.0800886 |
| H | -4.0017606 | -2.4490875 | 0.3582874  |
| H | -4.6770986 | 0.4480215  | -2.0254226 |
| H | -5.4223986 | -1.1534825 | -2.1771286 |
| H | -3.6972626 | -1.0229675 | -1.8457766 |
| H | -7.1538686 | -0.6385965 | -0.5231926 |
| H | -6.7375716 | 0.0090555  | 1.0706384  |
| H | -6.5016096 | 1.0050035  | -0.3888126 |
| H | -0.0121206 | 5.2259705  | 1.0626564  |
| H | 2.5672394  | 3.4947295  | -1.9016626 |
| H | 0.7692954  | 1.9437905  | -2.5637566 |
| H | -1.8170446 | 3.6389845  | 0.4093014  |
| H | -1.9108306 | 1.6824835  | -2.5467656 |
| H | -2.6480886 | 1.9247735  | -0.9625796 |
| H | 4.1963724  | 6.0323415  | 0.0639134  |

|   |           |            |            |
|---|-----------|------------|------------|
| H | 3.5669084 | 5.5350975  | -1.5284186 |
| H | 4.0820624 | 4.2974515  | -0.3421306 |
| P | 3.8988624 | -1.2021325 | -0.5701576 |
| C | 4.5509734 | -1.9865445 | 0.9328984  |
| H | 4.5120354 | -3.0750875 | 0.8291634  |
| H | 5.5889074 | -1.6721145 | 1.0936474  |
| H | 3.9394564 | -1.6908095 | 1.7918834  |
| C | 4.0613574 | 0.5939265  | -0.3455406 |
| H | 5.1010234 | 0.8501575  | -0.1093116 |
| H | 3.7567914 | 1.0977805  | -1.2690366 |
| H | 3.4001484 | 0.9271105  | 0.4628544  |
| C | 5.0730994 | -1.6340105 | -1.8929966 |
| H | 6.0815834 | -1.3022435 | -1.6191846 |
| H | 5.0805884 | -2.7170295 | -2.0480836 |
| H | 4.7735994 | -1.1490765 | -2.8270146 |

Zero-point correction= 0.641983 (Hartree/Particle)

Thermal correction to Energy= 0.684697

Thermal correction to Enthalpy= 0.685641

Thermal correction to Gibbs Free Energy= 0.566104

Sum of electronic and zero-point Energies= -2090.030548

Sum of electronic and thermal Energies= -2089.987834

Sum of electronic and thermal Enthalpies= -2089.986889

Sum of electronic and thermal Free Energies= -2090.106427

### **B-ts1**

|   |           |            |           |
|---|-----------|------------|-----------|
| C | 0.0325509 | -1.9418597 | 2.4006126 |
|---|-----------|------------|-----------|

|    |            |            |            |
|----|------------|------------|------------|
| C  | -1.2080131 | -1.9547787 | 3.0656806  |
| C  | -2.1250761 | -0.9665977 | 2.8125786  |
| C  | -1.8322091 | 0.0573543  | 1.8807646  |
| C  | -0.5700831 | 0.0887943  | 1.2150486  |
| C  | 0.3470699  | -0.9462557 | 1.5075686  |
| C  | -2.7857721 | 1.0752793  | 1.6038636  |
| C  | -2.5415641 | 2.0547303  | 0.6560706  |
| C  | -1.3091681 | 2.0840923  | 0.0121736  |
| C  | -0.3167161 | 1.1361523  | 0.2501556  |
| C  | -0.6331341 | -0.2900257 | -1.6470164 |
| C  | 0.8239879  | -0.3809087 | -1.8116544 |
| N  | 1.6435989  | 0.3336723  | -1.0208674 |
| C  | 1.0539529  | 1.4704473  | -0.3127104 |
| C  | -1.7583451 | -0.7900317 | -1.9782664 |
| N  | 2.5281759  | 3.2110133  | 0.6974506  |
| C  | 1.9895899  | 1.9673143  | 0.7996736  |
| O  | 2.2284759  | 1.2575293  | 1.7640706  |
| O  | 1.1578209  | -1.1502267 | -2.7032624 |
| O  | -3.9403091 | 1.0412033  | 2.3039036  |
| H  | 0.9008249  | 2.2846613  | -1.0336304 |
| Au | -3.5779671 | -0.6999717 | -0.8803374 |
| C  | -1.9451391 | -1.6930287 | -3.1857284 |
| C  | 2.5535289  | 4.2784803  | -0.3352224 |
| C  | 1.1785309  | 4.9160553  | -0.5231604 |
| C  | 3.1125809  | 3.7689113  | -1.6612224 |

|   |            |            |            |
|---|------------|------------|------------|
| C | 3.5048619  | 5.3348573  | 0.2228416  |
| C | 4.2885999  | -2.5532097 | 1.2082366  |
| C | 4.4961689  | -3.6368607 | 0.3456766  |
| C | 4.2545549  | -3.4881327 | -1.0206914 |
| C | 3.8018369  | -2.2648697 | -1.5074394 |
| C | 3.5895099  | -1.1814097 | -0.6595924 |
| C | 3.8493469  | -1.3408677 | 0.7089316  |
| C | 3.0999159  | 0.1339223  | -1.2018194 |
| O | 4.9303149  | -4.7744237 | 0.9288476  |
| C | 5.1894609  | -5.8861267 | 0.1026516  |
| H | 0.7637199  | -2.7222207 | 2.5979556  |
| H | -1.4336761 | -2.7406187 | 3.7815746  |
| H | -3.0798131 | -0.9473857 | 3.3307206  |
| H | 1.3178879  | -0.9552227 | 1.0272106  |
| H | -3.2984681 | 2.8072003  | 0.4382836  |
| H | -1.1228051 | 2.8726263  | -0.7137854 |
| H | 3.0901009  | 3.3997943  | 1.5219216  |
| H | -4.4103311 | 1.8768793  | 2.1934876  |
| H | -0.9912591 | -1.8496877 | -3.6967334 |
| H | -2.3520211 | -2.6581357 | -2.8665144 |
| H | -2.6723581 | -1.2475027 | -3.8722814 |
| H | 0.7364769  | 5.1761933  | 0.4453586  |
| H | 1.2738249  | 5.8333033  | -1.1158004 |
| H | 0.4817699  | 4.2635723  | -1.0609134 |
| H | 4.1145139  | 3.3458063  | -1.5228914 |



|   |            |            |            |
|---|------------|------------|------------|
| H | 3.1929049  | 4.6019373  | -2.3693234 |
| H | 2.4783429  | 3.0079103  | -2.1312594 |
| H | 3.6049519  | 6.1641493  | -0.4845344 |
| H | 3.1285639  | 5.7426403  | 1.1691556  |
| H | 4.5035049  | 4.9144933  | 0.3923776  |
| H | 4.5007849  | -2.6899817 | 2.2656096  |
| H | 4.4141419  | -4.3108847 | -1.7109714 |
| H | 3.5994659  | -2.1564587 | -2.5712504 |
| H | 3.6964359  | -0.5023537 | 1.3875846  |
| H | 3.3172669  | 0.2106893  | -2.2751504 |
| H | 3.5998729  | 0.9707293  | -0.7025834 |
| H | 5.5370969  | -6.6854687 | 0.7593296  |
| H | 5.9704699  | -5.6655187 | -0.6380694 |
| H | 4.2834189  | -6.2210867 | -0.4216864 |
| P | -5.7436011 | -0.9956577 | 0.0338796  |
| C | -6.7654591 | 0.5167293  | 0.0601536  |
| H | -6.8743421 | 0.9035403  | -0.9576334 |
| H | -7.7576011 | 0.3036133  | 0.4748256  |
| H | -6.2772861 | 1.2814703  | 0.6710256  |
| C | -5.8235871 | -1.6460917 | 1.7343316  |
| H | -6.8657651 | -1.8374147 | 2.0160406  |
| H | -5.2527441 | -2.5776627 | 1.7983296  |
| H | -5.3823841 | -0.9149177 | 2.4183306  |
| C | -6.7304111 | -2.1737147 | -0.9493814 |
| H | -7.7357701 | -2.2780587 | -0.5248074 |

H        -6.8088241        -1.8208257        -1.9822194

H        -6.2387701        -3.1512897        -0.9538734

Zero-point correction= 0.645393 (Hartree/Particle)

Thermal correction to Energy= 0.687642

Thermal correction to Enthalpy= 0.688587

Thermal correction to Gibbs Free Energy= 0.568113

Sum of electronic and zero-point Energies= -1754.897663

Sum of electronic and thermal Energies= -1754.855413

Sum of electronic and thermal Enthalpies= -1754.854469

Sum of electronic and thermal Free Energies= -1754.974942

**B-int1**

C        0.8992200        -2.5417790        1.5918406

C        0.4038190        -2.3561870        2.8889316

C        -0.4482200        -1.3069150        3.1406596

C        -0.7892880        -0.4148250        2.1004096

C        -0.2496130        -0.5734050        0.7968726

C        0.5649720        -1.6773320        0.5591146

C        -1.6683720        0.6671090        2.3481236

C        -2.1026500        1.5418680        1.3182426

C        -1.6222040        1.3774500        0.0603076

C        -0.5321000        0.4430790        -0.2805134

C        -0.6872580        -0.1862330        -1.6664384

C        0.6692740        -0.2270500        -2.2847404

N        1.4989750        0.5488200        -1.4954504

C        0.7306860        1.3675710        -0.5896114

|    |            |            |            |
|----|------------|------------|------------|
| C  | -1.8416900 | -0.6990130 | -2.1410484 |
| N  | 1.9604400  | 3.1294970  | 0.6347816  |
| C  | 1.5006940  | 1.8501190  | 0.6345506  |
| O  | 1.7254090  | 1.1013520  | 1.5760296  |
| O  | 1.0547980  | -0.8661150 | -3.2471454 |
| O  | -2.1150670 | 0.8180910  | 3.5799236  |
| H  | 0.3293800  | 2.2373960  | -1.1310634 |
| Au | -3.5700530 | -0.7835020 | -0.9939144 |
| C  | -1.9358710 | -1.3015560 | -3.5067704 |
| C  | 1.7748560  | 4.3076610  | -0.2519684 |
| C  | 0.3187160  | 4.7706100  | -0.2445284 |
| C  | 2.2733550  | 4.0418920  | -1.6700424 |
| C  | 2.6377900  | 5.4045760  | 0.3669986  |
| C  | 4.3611620  | -2.0159080 | 0.9246546  |
| C  | 4.4016460  | -3.1937490 | 0.1694396  |
| C  | 4.0075380  | -3.1695450 | -1.1698014 |
| C  | 3.5737400  | -1.9730130 | -1.7360484 |
| C  | 3.5126680  | -0.7976250 | -0.9885864 |
| C  | 3.9213610  | -0.8363900 | 0.3494756  |
| C  | 2.9610730  | 0.4636780  | -1.5987044 |
| O  | 4.8243380  | -4.2982340 | 0.8261606  |
| C  | 4.9621170  | -5.4929360 | 0.0912646  |
| H  | 1.5663230  | -3.3753220 | 1.3824256  |
| H  | 0.6826660  | -3.0410200 | 3.6841276  |
| H  | -0.8635040 | -1.1507360 | 4.1319506  |

|   |            |            |            |
|---|------------|------------|------------|
| H | 0.9773710  | -1.8625710 | -0.4282304 |
| H | -2.8411290 | 2.3099550  | 1.5450526  |
| H | -1.9639250 | 2.0313190  | -0.7421604 |
| H | 2.4703540  | 3.3114790  | 1.4937516  |
| H | -2.6970750 | 1.5870530  | 3.6580606  |
| H | -1.0035630 | -1.2456670 | -4.0749904 |
| H | -2.2290620 | -2.3566880 | -3.4230454 |
| H | -2.7408930 | -0.8153670 | -4.0730694 |
| H | -0.0282190 | 4.9279830  | 0.7837806  |
| H | 0.2249310  | 5.7189570  | -0.7862484 |
| H | -0.3554040 | 4.0554070  | -0.7309194 |
| H | 3.3306280  | 3.7524490  | -1.6578504 |
| H | 2.1832260  | 4.9584640  | -2.2643034 |
| H | 1.7111320  | 3.2601870  | -2.1926204 |
| H | 2.5705530  | 6.3191260  | -0.2307324 |
| H | 2.3050660  | 5.6440980  | 1.3848496  |
| H | 3.6907880  | 5.1012180  | 0.4027306  |
| H | 4.6870050  | -2.0572040 | 1.9610056  |
| H | 4.0435800  | -4.0660430 | -1.7815914 |
| H | 3.2548840  | -1.9559260 | -2.7762554 |
| H | 3.8765510  | 0.0671280  | 0.9552076  |
| H | 3.2070700  | 0.5187820  | -2.6667074 |
| H | 3.3842360  | 1.3515570  | -1.1141314 |
| H | 5.3458250  | -6.2418050 | 0.7863396  |
| H | 5.6722010  | -5.3768060 | -0.7388954 |

|   |            |            |            |
|---|------------|------------|------------|
| H | 3.9982380  | -5.8375750 | -0.3098464 |
| P | -5.6068810 | -1.0435870 | 0.2565556  |
| C | -5.5729960 | -0.3504380 | 1.9508816  |
| H | -5.3977510 | 0.7296370  | 1.8976556  |
| H | -6.5227670 | -0.5315090 | 2.4676736  |
| H | -4.7615340 | -0.8171110 | 2.5197146  |
| C | -6.0915970 | -2.7849460 | 0.5180726  |
| H | -7.0226230 | -2.8476370 | 1.0934736  |
| H | -6.2331900 | -3.2739350 | -0.4506214 |
| H | -5.2963850 | -3.3124890 | 1.0536776  |
| C | -7.0900100 | -0.2828430 | -0.4905764 |
| H | -7.9745150 | -0.4637140 | 0.1313376  |
| H | -6.9388950 | 0.7951850  | -0.6020324 |
| H | -7.2563490 | -0.7085000 | -1.4849024 |

Zero-point correction= 0.642903 (Hartree/Particle)

Thermal correction to Energy= 0.684929

Thermal correction to Enthalpy= 0.685874

Thermal correction to Gibbs Free Energy= 0.565238

Sum of electronic and zero-point Energies= -2090.031195

Sum of electronic and thermal Energies= -2089.989168

Sum of electronic and thermal Enthalpies= -2089.988224

Sum of electronic and thermal Free Energies= -2090.108860

### **B-ts2**

|   |            |            |           |
|---|------------|------------|-----------|
| C | -0.7772721 | -1.5804638 | 2.8221871 |
| C | -1.8626941 | -0.8793938 | 3.3487441 |

|    |            |            |            |
|----|------------|------------|------------|
| C  | -2.3628591 | 0.2173202  | 2.6693531  |
| C  | -1.7660701 | 0.6328992  | 1.4701671  |
| C  | -0.6320401 | -0.0334278 | 0.9681571  |
| C  | -0.1690251 | -1.1590998 | 1.6469671  |
| C  | -2.3516901 | 1.6996422  | 0.6789211  |
| C  | -1.7276391 | 2.2292302  | -0.4242429 |
| C  | -0.4589781 | 1.7467752  | -0.7971009 |
| C  | 0.0297979  | 0.4160152  | -0.3043549 |
| C  | -0.1644221 | -0.5184898 | -1.5266469 |
| C  | 1.1265479  | -0.4844818 | -2.2663959 |
| N  | 2.0431029  | 0.2668292  | -1.5234639 |
| C  | 1.5636309  | 0.4868352  | -0.1740569 |
| C  | -1.2826371 | -1.1998518 | -1.8562399 |
| N  | 0.9835959  | 2.8497952  | 0.2224521  |
| C  | 2.0327769  | 1.8564292  | 0.2753601  |
| O  | 3.1784079  | 2.1072962  | 0.5403621  |
| O  | 1.4141879  | -1.0024918 | -3.3278889 |
| O  | -3.5486551 | 2.1137162  | 1.0894941  |
| Au | -3.0998331 | -1.2313998 | -0.8277779 |
| C  | -1.3340481 | -2.0703998 | -3.0778139 |
| C  | 5.2255259  | -1.8919248 | 1.0056851  |
| C  | 4.9413549  | -3.2118968 | 0.6410011  |
| C  | 4.1932059  | -3.4652518 | -0.5118369 |
| C  | 3.7426079  | -2.3999708 | -1.2856479 |
| C  | 4.0234359  | -1.0792798 | -0.9338949 |

|   |            |            |            |
|---|------------|------------|------------|
| C | 4.7693899  | -0.8422918 | 0.2261701  |
| C | 3.4803399  | 0.0555132  | -1.7581429 |
| O | 5.4288739  | -4.1665068 | 1.4633591  |
| C | 5.2213939  | -5.5147988 | 1.1119441  |
| H | -0.3970821 | -2.4589868 | 3.3368331  |
| H | -2.3187361 | -1.1968868 | 4.2826651  |
| H | -3.2184531 | 0.7650232  | 3.0551721  |
| H | 0.6645359  | -1.7290818 | 1.2402141  |
| H | -2.2051811 | 3.0219942  | -0.9963619 |
| H | -3.8696121 | 2.8348952  | 0.5306761  |
| H | -0.4061931 | -2.0925898 | -3.6524279 |
| H | -1.6063121 | -3.0932358 | -2.7855059 |
| H | -2.1501881 | -1.7297598 | -3.7292679 |
| H | 5.8138529  | -1.7221628 | 1.9037521  |
| H | 3.9706129  | -4.4819718 | -0.8218929 |
| H | 3.1708389  | -2.5988918 | -2.1915389 |
| H | 4.9906509  | 0.1835782  | 0.5180001  |
| H | 3.5628429  | -0.1501148 | -2.8303339 |
| H | 4.0141779  | 0.9889422  | -1.5463509 |
| H | 5.7091599  | -6.1141978 | 1.8825781  |
| H | 5.6685749  | -5.7520378 | 0.1367671  |
| H | 4.1518219  | -5.7678568 | 1.0854351  |
| P | -5.3046121 | -1.4306638 | 0.0909871  |
| C | -5.5652951 | -1.0105688 | 1.8510321  |
| H | -5.3129651 | 0.0426422  | 2.0144131  |

|   |            |            |            |
|---|------------|------------|------------|
| H | -6.6115221 | -1.1789888 | 2.1324001  |
| H | -4.9167641 | -1.6277948 | 2.4807971  |
| C | -5.9867131 | -3.1186878 | -0.0564209 |
| H | -7.0157451 | -3.1563188 | 0.3197891  |
| H | -5.9741411 | -3.4275318 | -1.1062659 |
| H | -5.3670951 | -3.8178678 | 0.5133211  |
| C | -6.5355811 | -0.3896848 | -0.7714329 |
| H | -7.5404771 | -0.5562868 | -0.3659789 |
| H | -6.2691091 | 0.6654162  | -0.6516349 |
| H | -6.5329671 | -0.6256018 | -1.8400219 |
| H | 1.9770279  | -0.2647628 | 0.5183831  |
| H | -0.0595761 | 2.0505072  | -1.7628829 |
| H | 0.4638429  | 2.8397522  | 1.1049561  |
| C | 1.3667329  | 4.2663662  | -0.1316699 |
| C | 2.2182239  | 4.2414122  | -1.3940099 |
| C | 0.0685679  | 5.0175852  | -0.3970819 |
| C | 2.1057939  | 4.9154532  | 1.0343821  |
| H | 3.2117239  | 3.8211962  | -1.2148549 |
| H | 1.7333199  | 3.6664502  | -2.1936659 |
| H | 2.3494329  | 5.2667562  | -1.7555869 |
| H | -0.6181361 | 4.9566012  | 0.4578111  |
| H | 0.2936249  | 6.0764562  | -0.5638379 |
| H | -0.4430881 | 4.6432682  | -1.2914859 |
| H | 2.3543369  | 5.9507542  | 0.7734801  |
| H | 1.4741319  | 4.9451782  | 1.9321441  |



|   |           |           |           |
|---|-----------|-----------|-----------|
| H | 3.0314009 | 4.3854292 | 1.2697061 |
|---|-----------|-----------|-----------|

Zero-point correction= 0.647503 (Hartree/Particle)

Thermal correction to Energy= 0.688211

Thermal correction to Enthalpy= 0.689155

Thermal correction to Gibbs Free Energy= 0.572381

Sum of electronic and zero-point Energies= -1754.916253

Sum of electronic and thermal Energies= -1754.875545

Sum of electronic and thermal Enthalpies= -1754.874601

Sum of electronic and thermal Free Energies= -1754.991375

### **B-int2**

|   |           |            |           |
|---|-----------|------------|-----------|
| C | 0.7190289 | -3.0189087 | 1.1238696 |
|---|-----------|------------|-----------|

|   |            |            |           |
|---|------------|------------|-----------|
| C | -0.1990141 | -3.1795147 | 2.1589596 |
|---|------------|------------|-----------|

|   |            |            |           |
|---|------------|------------|-----------|
| C | -1.0330811 | -2.1275687 | 2.5045456 |
|---|------------|------------|-----------|

|   |            |            |           |
|---|------------|------------|-----------|
| C | -0.9626591 | -0.9110147 | 1.8143966 |
|---|------------|------------|-----------|

|   |            |            |           |
|---|------------|------------|-----------|
| C | -0.0428621 | -0.7476497 | 0.7705836 |
|---|------------|------------|-----------|

|   |           |            |           |
|---|-----------|------------|-----------|
| C | 0.7949789 | -1.8128377 | 0.4403796 |
|---|-----------|------------|-----------|

|   |            |           |           |
|---|------------|-----------|-----------|
| C | -1.8512381 | 0.1954963 | 2.1588156 |
|---|------------|-----------|-----------|

|   |            |           |           |
|---|------------|-----------|-----------|
| C | -1.7825741 | 1.4062653 | 1.5703486 |
|---|------------|-----------|-----------|

|   |            |           |           |
|---|------------|-----------|-----------|
| C | -0.8252631 | 1.7093643 | 0.4794116 |
|---|------------|-----------|-----------|

|   |           |           |           |
|---|-----------|-----------|-----------|
| C | 0.1283909 | 0.5603943 | 0.0177786 |
|---|-----------|-----------|-----------|

|   |           |           |            |
|---|-----------|-----------|------------|
| C | 0.0467739 | 0.3857493 | -1.5007584 |
|---|-----------|-----------|------------|

|   |           |           |            |
|---|-----------|-----------|------------|
| C | 1.3394329 | 0.7982313 | -2.0892924 |
|---|-----------|-----------|------------|

|   |           |           |            |
|---|-----------|-----------|------------|
| N | 2.1543079 | 1.2859463 | -1.0533414 |
|---|-----------|-----------|------------|

|   |           |           |           |
|---|-----------|-----------|-----------|
| C | 1.5712339 | 1.0674393 | 0.2468756 |
|---|-----------|-----------|-----------|

|   |            |            |            |
|---|------------|------------|------------|
| C | -1.0282161 | -0.1092467 | -2.1553284 |
|---|------------|------------|------------|

|    |            |            |            |
|----|------------|------------|------------|
| N  | 0.0676509  | 2.9035063  | 0.9057656  |
| C  | 1.5054299  | 2.3768503  | 0.9680296  |
| O  | 2.3468749  | 2.9825983  | 1.5491876  |
| O  | 1.7317899  | 0.7440333  | -3.2387124 |
| O  | -2.7714691 | -0.1129487 | 3.0950226  |
| Au | -2.7135141 | -0.8340027 | -1.1664514 |
| C  | -1.0692141 | -0.2293567 | -3.6468374 |
| C  | 4.9561959  | -1.6059367 | 0.9588476  |
| C  | 4.8126879  | -2.6989457 | 0.0974056  |
| C  | 4.3383749  | -2.4988387 | -1.2029034 |
| C  | 4.0010779  | -1.2149547 | -1.6214444 |
| C  | 4.1295419  | -0.1185027 | -0.7676924 |
| C  | 4.6197029  | -0.3341867 | 0.5255046  |
| C  | 3.6181089  | 1.2291963  | -1.1896474 |
| O  | 5.1545379  | -3.8993987 | 0.6111606  |
| C  | 5.0803769  | -5.0287297 | -0.2289864 |
| H  | 1.3889819  | -3.8306887 | 0.8501666  |
| H  | -0.2541051 | -4.1179497 | 2.7039826  |
| H  | -1.7376921 | -2.2319787 | 3.3249936  |
| H  | 1.5228909  | -1.7005257 | -0.3643404 |
| H  | -2.5332611 | 2.1649553  | 1.8005236  |
| H  | -3.2812591 | 0.6710293  | 3.3335696  |
| H  | -0.1932941 | 0.1836113  | -4.1528654 |
| H  | -1.1630031 | -1.2895027 | -3.9196834 |
| H  | -1.9793601 | 0.2476653  | -4.0328744 |

|   |            |            |            |
|---|------------|------------|------------|
| H | 5.3405609  | -1.7862937 | 1.9592466  |
| H | 4.2394539  | -3.3289247 | -1.8960904 |
| H | 3.6235739  | -1.0605107 | -2.6318124 |
| H | 4.7387609  | 0.5144763  | 1.2012516  |
| H | 3.8212389  | 1.4361913  | -2.2452874 |
| H | 4.0595679  | 2.0349313  | -0.5890134 |
| H | 5.4141409  | -5.8798327 | 0.3667636  |
| H | 5.7351629  | -4.9252557 | -1.1048434 |
| H | 4.0516539  | -5.2124077 | -0.5718224 |
| P | -4.6813731 | -1.7137927 | -0.1177974 |
| C | -4.3998821 | -2.7807667 | 1.3380066  |
| H | -3.9364371 | -2.1837477 | 2.1316296  |
| H | -5.3480761 | -3.1954587 | 1.7002486  |
| H | -3.7194181 | -3.5970627 | 1.0761546  |
| C | -5.7390491 | -2.7234427 | -1.2126854 |
| H | -6.6310981 | -3.0709447 | -0.6784874 |
| H | -6.0442611 | -2.1300487 | -2.0800154 |
| H | -5.1738211 | -3.5889077 | -1.5717374 |
| C | -5.8173391 | -0.4318287 | 0.5242066  |
| H | -6.6999851 | -0.8873567 | 0.9884086  |
| H | -5.2886571 | 0.1712353  | 1.2700656  |
| H | -6.1352101 | 0.2251483  | -0.2910554 |
| H | 2.1834979  | 0.3773763  | 0.8499706  |
| H | -1.3614551 | 2.0616723  | -0.4071884 |
| H | -0.1639591 | 3.1297733  | 1.8813836  |

|   |            |           |            |
|---|------------|-----------|------------|
| C | -0.1274131 | 4.2479023 | 0.1195266  |
| C | 0.2786109  | 4.0407223 | -1.3257014 |
| C | -1.5966181 | 4.6188243 | 0.2574676  |
| C | 0.7303719  | 5.3111913 | 0.7885696  |
| H | 1.3342499  | 3.7610533 | -1.4193934 |
| H | -0.3259261 | 3.2819413 | -1.8359914 |
| H | 0.1353669  | 4.9872843 | -1.8575114 |
| H | -1.8838511 | 4.7481563 | 1.3090826  |
| H | -1.7530741 | 5.5812473 | -0.2409144 |
| H | -2.2737341 | 3.8996003 | -0.2140914 |
| H | 0.4951309  | 6.2734333 | 0.3214746  |
| H | 0.5111259  | 5.4024813 | 1.8596426  |
| H | 1.8008819  | 5.1327963 | 0.6693776  |

Zero-point correction= 0.644565 (Hartree/Particle)

Thermal correction to Energy= 0.685422

Thermal correction to Enthalpy= 0.686366

Thermal correction to Gibbs Free Energy= 0.570104

Sum of electronic and zero-point Energies= -2090.035396

Sum of electronic and thermal Energies= -2089.994539

Sum of electronic and thermal Enthalpies= -2089.993595

Sum of electronic and thermal Free Energies= -2090.109857

### **B-ts3**

|   |            |            |           |
|---|------------|------------|-----------|
| C | -0.2942590 | -2.7448581 | 1.7735220 |
| C | -1.2523640 | -2.4560461 | 2.7511310 |
| C | -1.8131520 | -1.1962541 | 2.7979090 |

|    |            |            |            |
|----|------------|------------|------------|
| C  | -1.4267900 | -0.2154001 | 1.8621260  |
| C  | -0.4709620 | -0.5051911 | 0.8691100  |
| C  | 0.0917110  | -1.7825161 | 0.8530310  |
| C  | -2.0419170 | 1.0828209  | 1.8818160  |
| C  | -1.6643010 | 2.1228239  | 1.0318850  |
| C  | -0.6380990 | 1.9094479  | -0.0633650 |
| C  | 0.0109330  | 0.4979579  | -0.1533690 |
| C  | -0.0704780 | -0.0109101 | -1.5914960 |
| C  | 1.2569040  | 0.2183769  | -2.2178810 |
| N  | 2.0894010  | 0.7933359  | -1.2556420 |
| C  | 1.5162390  | 0.7635399  | 0.0686610  |
| C  | -1.1700690 | -0.5450061 | -2.1660000 |
| N  | 0.4158970  | 2.8686759  | 0.4651090  |
| C  | 1.6543750  | 2.1447119  | 0.6584720  |
| O  | 2.6398600  | 2.6054949  | 1.1667430  |
| O  | 1.6379190  | -0.0351401 | -3.3450360 |
| O  | -2.9744620 | 1.2619229  | 2.8029120  |
| Au | -2.9307820 | -0.9577471 | -1.1329450 |
| C  | -1.1971710 | -0.9522631 | -3.6074610 |
| C  | 5.1878450  | -1.6674521 | 1.0354880  |
| C  | 5.0576700  | -2.8844711 | 0.3586210  |
| C  | 4.4489750  | -2.9164651 | -0.8992710 |
| C  | 3.9833650  | -1.7339831 | -1.4666760 |
| C  | 4.1150810  | -0.5136461 | -0.8039300 |
| C  | 4.7208050  | -0.4989231 | 0.4570310  |

|   |            |            |            |
|---|------------|------------|------------|
| C | 3.5462520  | 0.7390859  | -1.4091830 |
| O | 5.5461390  | -3.9682881 | 1.0007860  |
| C | 5.5073980  | -5.2086111 | 0.3340940  |
| H | 0.1598460  | -3.7317241 | 1.7361700  |
| H | -1.5402120 | -3.2114631 | 3.4769990  |
| H | -2.5445770 | -0.9443591 | 3.5612870  |
| H | 0.8360950  | -2.0241131 | 0.0948380  |
| H | -2.4024510 | 2.9109809  | 0.8660870  |
| H | -3.3394700 | 2.1576769  | 2.7635050  |
| H | -1.4205330 | -2.0250821 | -3.6827070 |
| H | -2.0292960 | -0.4472471 | -4.1156150 |
| H | -0.2670810 | -0.7458541 | -4.1420450 |
| H | 5.6696430  | -1.6698061 | 2.0097630  |
| H | 4.3484820  | -3.8482661 | -1.4480780 |
| H | 3.5157520  | -1.7552821 | -2.4509340 |
| H | 4.8282050  | 0.4475499  | 0.9878300  |
| H | 3.7267090  | 0.7870139  | -2.4882830 |
| H | 3.9826290  | 1.6333819  | -0.9456990 |
| H | 5.9754770  | -5.9339411 | 1.0018280  |
| H | 6.0672100  | -5.1774501 | -0.6107670 |
| H | 4.4755600  | -5.5270021 | 0.1270210  |
| P | -4.9568900 | -1.6238101 | -0.0329320 |
| C | -4.7824430 | -3.2100081 | 0.8574930  |
| H | -3.9791250 | -3.1210401 | 1.5969440  |
| H | -5.7172030 | -3.4835281 | 1.3608850  |

|   |            |            |            |
|---|------------|------------|------------|
| H | -4.5088880 | -3.9981611 | 0.1491660  |
| C | -6.3911100 | -1.8911891 | -1.1315150 |
| H | -7.2596620 | -2.2369201 | -0.5588360 |
| H | -6.6438850 | -0.9583131 | -1.6445800 |
| H | -6.1371950 | -2.6395651 | -1.8884950 |
| C | -5.6008950 | -0.4889651 | 1.2499570  |
| H | -6.5204980 | -0.8882781 | 1.6938610  |
| H | -4.8496790 | -0.3588741 | 2.0370270  |
| H | -5.8148960 | 0.4875349  | 0.8032410  |
| H | 2.0233310  | 0.0275199  | 0.7123360  |
| H | -0.9890560 | 2.2099349  | -1.0545170 |
| H | -0.5363310 | 2.7840489  | 1.4718620  |
| C | 0.5213850  | 4.2761679  | -0.1329560 |
| C | 1.2425120  | 4.1745489  | -1.4700820 |
| C | -0.8764960 | 4.8516809  | -0.3270300 |
| C | 1.2761250  | 5.1672409  | 0.8459960  |
| H | 2.2646060  | 3.7990019  | -1.3508680 |
| H | 0.7140890  | 3.5223689  | -2.1763950 |
| H | 1.3058680  | 5.1711959  | -1.9208450 |
| H | -1.3999600 | 4.9820449  | 0.6277090  |
| H | -0.7707200 | 5.8470939  | -0.7705980 |
| H | -1.5012390 | 4.2671699  | -1.0116730 |
| H | 1.2630550  | 6.1929519  | 0.4607850  |
| H | 0.7876260  | 5.1690969  | 1.8280070  |
| H | 2.3136210  | 4.8590129  | 0.9786580  |

Zero-point correction= 0.639545 (Hartree/Particle)

Thermal correction to Energy= 0.680112

Thermal correction to Enthalpy= 0.681056

Thermal correction to Gibbs Free Energy= 0.564787

Sum of electronic and zero-point Energies= -2089.997329

Sum of electronic and thermal Energies= -2089.956762

Sum of electronic and thermal Enthalpies= -2089.955818

Sum of electronic and thermal Free Energies= -2090.072087

### **B-int3**

|   |            |            |            |
|---|------------|------------|------------|
| C | 2.0788242  | -2.8818355 | 0.7613342  |
| C | 1.1575902  | -3.5803975 | 1.5614232  |
| C | -0.0099248 | -2.9624935 | 1.9313152  |
| C | -0.2718978 | -1.6328295 | 1.5089902  |
| C | 0.6315382  | -0.9474115 | 0.6592112  |
| C | 1.8196872  | -1.5983745 | 0.3131512  |
| C | -1.3736638 | -0.9007565 | 1.9996332  |
| C | -1.3672388 | 0.5734065  | 1.9944132  |
| C | -0.9066938 | 1.1444075  | 0.6414712  |
| C | 0.2869472  | 0.3738895  | 0.0316202  |
| C | 0.0952012  | 0.1115935  | -1.4721928 |
| C | 1.3401632  | 0.5901745  | -2.1518648 |
| N | 2.0530022  | 1.3232065  | -1.2301058 |
| C | 1.4598372  | 1.3600485  | 0.0807082  |
| C | -0.9756718 | -0.4750355 | -2.0362548 |
| N | -0.4936838 | 2.5349945  | 0.7240102  |



|    |            |            |            |
|----|------------|------------|------------|
| C  | 0.8221062  | 2.7178295  | 0.3487102  |
| O  | 1.4052742  | 3.7691245  | 0.1928592  |
| O  | 1.7132902  | 0.3878915  | -3.2940558 |
| O  | -2.3900098 | -1.4557545 | 2.6047912  |
| Au | -2.7200228 | -1.0647725 | -1.0401478 |
| C  | -1.0803788 | -0.6879985 | -3.5174438 |
| C  | 5.6642202  | -0.2417045 | 0.8792992  |
| C  | 5.9150982  | -1.3872865 | 0.1168712  |
| C  | 5.4053912  | -1.4803225 | -1.1818898 |
| C  | 4.6447352  | -0.4333115 | -1.6976948 |
| C  | 4.3808552  | 0.7103435  | -0.9436178 |
| C  | 4.9105362  | 0.7928955  | 0.3489302  |
| C  | 3.4296422  | 1.7518215  | -1.4647078 |
| O  | 6.6531622  | -2.3460575 | 0.7206422  |
| C  | 7.0178552  | -3.4768725 | -0.0359358 |
| H  | 3.0179362  | -3.3550005 | 0.4824142  |
| H  | 1.3823882  | -4.5852065 | 1.9054762  |
| H  | -0.6829728 | -3.4801145 | 2.6150992  |
| H  | 2.5495542  | -1.1057685 | -0.3289768 |
| H  | -2.3533138 | 0.9451195  | 2.2864172  |
| H  | -0.1902408 | -0.3540845 | -4.0579438 |
| H  | -1.2477088 | -1.7517775 | -3.7316648 |
| H  | -1.9600798 | -0.1623505 | -3.9127898 |
| H  | 6.0885892  | -0.1861845 | 1.8784652  |
| H  | 5.6073762  | -2.3492675 | -1.8017098 |

|   |            |            |            |
|---|------------|------------|------------|
| H | 4.2328572  | -0.5087465 | -2.7038488 |
| H | 4.7351902  | 1.6905875  | 0.9429412  |
| H | 3.5287872  | 1.8854695  | -2.5468808 |
| H | 3.5699242  | 2.7245145  | -0.9794968 |
| H | 7.6402012  | -4.0964435 | 0.6119702  |
| H | 7.5944042  | -3.1983455 | -0.9285128 |
| H | 6.1381892  | -4.0589995 | -0.3493038 |
| P | -4.9254928 | -1.5812285 | -0.2020008 |
| C | -5.1798928 | -2.9986115 | 0.9287792  |
| H | -4.7021238 | -2.7936845 | 1.8925792  |
| H | -6.2505678 | -3.1557365 | 1.1047502  |
| H | -4.7523628 | -3.9093975 | 0.4990272  |
| C | -6.0898358 | -1.9114095 | -1.5697228 |
| H | -7.1063818 | -2.0609285 | -1.1875658 |
| H | -6.0858078 | -1.0650775 | -2.2637838 |
| H | -5.7743878 | -2.8045505 | -2.1177948 |
| C | -5.6917518 | -0.1862855 | 0.6978412  |
| H | -6.7180398 | -0.4303905 | 0.9963732  |
| H | -5.1040468 | 0.0467855  | 1.5926892  |
| H | -5.7072388 | 0.6982695  | 0.0527512  |
| H | 2.2065462  | 1.1261615  | 0.8573062  |
| H | -1.7561608 | 1.0478615  | -0.0467558 |
| C | -1.4885478 | 3.6518595  | 0.5693532  |
| C | -1.6014838 | 3.9712145  | -0.9193688 |
| C | -2.8550708 | 3.2339275  | 1.1056562  |

|   |            |            |            |
|---|------------|------------|------------|
| C | -1.0298828 | 4.8665715  | 1.3715132  |
| H | -0.6412718 | 4.3112645  | -1.3194308 |
| H | -1.9230788 | 3.0858695  | -1.4865118 |
| H | -2.3386098 | 4.7656925  | -1.0837328 |
| H | -2.8270928 | 3.0415915  | 2.1855902  |
| H | -3.5495018 | 4.0659955  | 0.9478332  |
| H | -3.2794068 | 2.3643635  | 0.5851562  |
| H | -1.7976528 | 5.6465075  | 1.3082902  |
| H | -0.9011918 | 4.6008455  | 2.4277092  |
| H | -0.0879678 | 5.2684645  | 0.9973552  |
| H | -0.6517818 | 0.8879905  | 2.7719162  |
| H | -2.3367698 | -2.4257485 | 2.5690682  |

Zero-point correction= 0.644576 (Hartree/Particle)

Thermal correction to Energy= 0.685488

Thermal correction to Enthalpy= 0.686432

Thermal correction to Gibbs Free Energy= 0.569625

Sum of electronic and zero-point Energies= -2090.043892

Sum of electronic and thermal Energies= -2090.002980

Sum of electronic and thermal Enthalpies= -2090.002036

Sum of electronic and thermal Free Energies= -2090.118843

#### **B-ts4**

|   |           |            |           |
|---|-----------|------------|-----------|
| C | 3.2164418 | -2.3779508 | 1.6857284 |
| C | 2.5498388 | -3.1386138 | 2.6443574 |
| C | 1.2186148 | -2.8707628 | 2.9383894 |
| C | 0.6017458 | -1.8050208 | 2.2871114 |

|    |            |            |            |
|----|------------|------------|------------|
| C  | 1.2466638  | -1.0482598 | 1.2970694  |
| C  | 2.5683278  | -1.3575218 | 0.9933504  |
| C  | -0.7548392 | -1.3395698 | 2.4516144  |
| C  | -0.9335812 | 0.1041552  | 2.6657734  |
| C  | -0.8111842 | 0.5672852  | 1.1539474  |
| C  | 0.3628048  | -0.1522478 | 0.4367434  |
| C  | -0.0739782 | -1.0700698 | -0.7119296 |
| C  | 0.8715178  | -0.7532538 | -1.8396836 |
| N  | 1.3848818  | 0.5020652  | -1.5815936 |
| C  | 1.1698288  | 0.9479792  | -0.2276296 |
| C  | -1.0607412 | -2.0031548 | -0.7494086 |
| N  | -0.6427542 | 1.9837952  | 0.8872874  |
| C  | 0.3300428  | 2.2002482  | -0.0856246 |
| O  | 0.5024618  | 3.2125982  | -0.7285216 |
| O  | 1.0949888  | -1.4073668 | -2.8396126 |
| O  | -1.7487642 | -2.0183768 | 2.0208084  |
| Au | -3.1170402 | -1.3443408 | -0.5197676 |
| C  | -1.0740382 | -3.0324458 | -1.8565986 |
| C  | 5.6542788  | 1.1351262  | -0.3550396 |
| C  | 6.1778748  | -0.1359658 | -0.6174736 |
| C  | 5.5138148  | -0.9896518 | -1.5041116 |
| C  | 4.3333428  | -0.5667668 | -2.1099176 |
| C  | 3.7983078  | 0.6947932  | -1.8499656 |
| C  | 4.4811838  | 1.5418012  | -0.9692686 |
| C  | 2.4536368  | 1.0748502  | -2.4039126 |

|   |            |            |            |
|---|------------|------------|------------|
| O | 7.3218618  | -0.4441038 | 0.0303144  |
| C | 7.9232618  | -1.6896678 | -0.2377386 |
| H | 4.2557738  | -2.5921748 | 1.4471184  |
| H | 3.0673528  | -3.9411708 | 3.1618094  |
| H | 0.6813248  | -3.4405048 | 3.6923424  |
| H | 3.1008038  | -0.8351688 | 0.1992584  |
| H | -1.9260172 | 0.3424862  | 3.0494784  |
| H | -0.0769312 | -3.4442168 | -2.0412256 |
| H | -1.7619472 | -3.8524298 | -1.6272826 |
| H | -1.3948632 | -2.5875998 | -2.8094736 |
| H | 6.1981298  | 1.7842932  | 0.3261334  |
| H | 5.9122188  | -1.9724978 | -1.7385546 |
| H | 3.8057668  | -1.2351388 | -2.7897526 |
| H | 4.0816978  | 2.5370992  | -0.7684766 |
| H | 2.3051478  | 0.6786942  | -3.4136736 |
| H | 2.3121128  | 2.1611592  | -2.4280946 |
| H | 8.8354348  | -1.7282848 | 0.3598674  |
| H | 8.1849358  | -1.7931068 | -1.2996056 |
| H | 7.2703448  | -2.5264218 | 0.0516824  |
| P | -5.3333812 | -0.5888918 | -0.8091566 |
| C | -6.5930952 | -1.9032188 | -0.7207756 |
| H | -6.5639762 | -2.3795268 | 0.2637604  |
| H | -7.5915372 | -1.4843268 | -0.8922756 |
| H | -6.3857092 | -2.6637868 | -1.4795396 |
| C | -5.5917982 | 0.2002932  | -2.4318156 |

|   |            |            |            |
|---|------------|------------|------------|
| H | -6.6314522 | 0.5326472  | -2.5341016 |
| H | -4.9242332 | 1.0621052  | -2.5325416 |
| H | -5.3591052 | -0.5107008 | -3.2302656 |
| C | -5.8876672 | 0.6649332  | 0.3948744  |
| H | -6.9211662 | 0.9624032  | 0.1820124  |
| H | -5.8310602 | 0.2596672  | 1.4100414  |
| H | -5.2402542 | 1.5466192  | 0.3311024  |
| H | 2.1331248  | 1.1311262  | 0.2772484  |
| H | -1.7559912 | 0.2308072  | 0.6997574  |
| C | -1.8060512 | 2.9351692  | 0.9664494  |
| C | -2.5398822 | 2.9201372  | -0.3752556 |
| C | -2.7737112 | 2.5183322  | 2.0684034  |
| C | -1.2918892 | 4.3315112  | 1.3064734  |
| H | -1.8997432 | 3.2868002  | -1.1822016 |
| H | -2.8696092 | 1.8989012  | -0.6284446 |
| H | -3.4268702 | 3.5641692  | -0.3241486 |
| H | -2.2954582 | 2.5194352  | 3.0550254  |
| H | -3.5838772 | 3.2553112  | 2.1047094  |
| H | -3.2393402 | 1.5401402  | 1.8849734  |
| H | -2.1446882 | 5.0115932  | 1.4152804  |
| H | -0.7479962 | 4.3143052  | 2.2579794  |
| H | -0.6318762 | 4.7216962  | 0.5313174  |
| H | -0.1445102 | 0.5448992  | 3.2803314  |
| H | -1.5372792 | -2.3971528 | 1.0345314  |

Zero-point correction= 0.639829 (Hartree/Particle)

Thermal correction to Energy= 0.679810

Thermal correction to Enthalpy= 0.680754

Thermal correction to Gibbs Free Energy= 0.567487

Sum of electronic and zero-point Energies= -2089.995906

Sum of electronic and thermal Energies= -2089.955925

Sum of electronic and thermal Enthalpies= -2089.954981

Sum of electronic and thermal Free Energies= -2090.068248

## **B-2**

|   |            |            |            |
|---|------------|------------|------------|
| C | 2.3000291  | -3.1585919 | -1.0204535 |
| C | 1.1822391  | -3.9931189 | -1.1086525 |
| C | -0.0744759 | -3.4560019 | -0.9195995 |
| C | -0.2196889 | -2.0844449 | -0.6404205 |
| C | 0.9010101  | -1.2266569 | -0.6127075 |
| C | 2.1623981  | -1.7956229 | -0.7944965 |
| C | -1.5145629 | -1.5738599 | -0.2462305 |
| C | -1.5072429 | -0.2906619 | 0.5121925  |
| C | -0.6634309 | 0.7752941  | -0.1904685 |
| C | 0.7677601  | 0.2775961  | -0.4789295 |
| C | 1.3848811  | 0.9555491  | -1.7002525 |
| C | 2.7261581  | 1.4833211  | -1.3111635 |
| N | 2.8082341  | 1.3687441  | 0.0533585  |
| C | 1.6016851  | 0.8733451  | 0.6675875  |
| C | 0.8451311  | 0.9829721  | -2.9234335 |
| N | -0.5035939 | 1.9509471  | 0.6524865  |
| C | 0.7674831  | 2.0518981  | 1.1723975  |

|    |            |            |            |
|----|------------|------------|------------|
| O  | 1.2156411  | 2.9442631  | 1.8614125  |
| O  | 3.6155711  | 1.8998141  | -2.0323105 |
| O  | -2.5632519 | -2.2170359 | -0.4713405 |
| Au | -4.5626089 | -1.5513639 | -0.0115365 |
| C  | 1.4252591  | 1.6059601  | -4.1423705 |
| C  | 4.9976161  | -1.8030279 | 2.2946925  |
| C  | 5.7351031  | -2.3731899 | 1.2521205  |
| C  | 5.9731841  | -1.6361149 | 0.0885085  |
| C  | 5.4631601  | -0.3447879 | -0.0218715 |
| C  | 4.7177971  | 0.2304541  | 1.0069745  |
| C  | 4.5003501  | -0.5161299 | 2.1693005  |
| C  | 4.0492281  | 1.5605291  | 0.7962175  |
| O  | 6.1736161  | -3.6348109 | 1.4632945  |
| C  | 6.9817821  | -4.2292389 | 0.4751535  |
| H  | 3.2992581  | -3.5724389 | -1.1380215 |
| H  | 1.3033401  | -5.0547219 | -1.3034735 |
| H  | -0.9642299 | -4.0798769 | -0.9397425 |
| H  | 3.0563021  | -1.1736409 | -0.7583275 |
| H  | -2.5319469 | 0.0590311  | 0.6833925  |
| H  | 2.4016591  | 2.0492731  | -3.9413225 |
| H  | 1.5304501  | 0.8548061  | -4.9351955 |
| H  | 0.7481681  | 2.3742371  | -4.5366805 |
| H  | 4.8429251  | -2.3908909 | 3.1957715  |
| H  | 6.5623501  | -2.0495019 | -0.7250675 |
| H  | 5.6372141  | 0.2273671  | -0.9331075 |



|   |            |            |            |
|---|------------|------------|------------|
| H | 3.9407591  | -0.0734989 | 2.9941295  |
| H | 4.6669961  | 2.2335381  | 0.1920255  |
| H | 3.8097201  | 2.0646371  | 1.7397575  |
| H | 7.2510181  | -5.2188969 | 0.8481985  |
| H | 7.8989721  | -3.6505559 | 0.2991655  |
| H | 6.4440801  | -4.3410549 | -0.4781915 |
| P | -6.7235149 | -0.8913289 | 0.4119935  |
| C | -7.8091749 | -1.0349349 | -1.0389755 |
| H | -7.8428089 | -2.0750679 | -1.3763845 |
| H | -8.8221869 | -0.7045679 | -0.7814225 |
| H | -7.4225839 | -0.4159989 | -1.8540675 |
| C | -6.8277829 | 0.8459921  | 0.9393345  |
| H | -7.8733179 | 1.1233491  | 1.1169085  |
| H | -6.2552329 | 0.9866231  | 1.8612955  |
| H | -6.4075359 | 1.4936271  | 0.1635505  |
| C | -7.5206179 | -1.8579519 | 1.7289775  |
| H | -8.5428229 | -1.4966719 | 1.8909605  |
| H | -7.5509379 | -2.9147549 | 1.4476755  |
| H | -6.9503849 | -1.7601609 | 2.6575235  |
| H | 1.8306771  | 0.1594561  | 1.4739135  |
| H | -1.1509589 | 1.0455791  | -1.1379775 |
| C | -1.4458029 | 3.1131181  | 0.6234185  |
| C | -0.8892359 | 4.1349811  | -0.3645035 |
| C | -2.8401789 | 2.6720421  | 0.1787365  |
| C | -1.5814549 | 3.7119381  | 2.0217505  |

|   |            |            |            |
|---|------------|------------|------------|
| H | 0.1048771  | 4.4692611  | -0.0504515 |
| H | -0.8090459 | 3.7030861  | -1.3711465 |
| H | -1.5429409 | 5.0133681  | -0.4203485 |
| H | -3.3050919 | 2.0005621  | 0.9135415  |
| H | -3.4707339 | 3.5656571  | 0.1126175  |
| H | -2.8590299 | 2.1948641  | -0.8090145 |
| H | -2.3337809 | 4.5092531  | 1.9973045  |
| H | -1.9155069 | 2.9470241  | 2.7338805  |
| H | -0.6383029 | 4.1257711  | 2.3794325  |
| H | -1.0598919 | -0.4917469 | 1.4987335  |
| H | -0.1281929 | 0.4937951  | -3.0500235 |

Zero-point correction= 0.645004 (Hartree/Particle)

Thermal correction to Energy= 0.685868

Thermal correction to Enthalpy= 0.686812

Thermal correction to Gibbs Free Energy= 0.567963

Sum of electronic and zero-point Energies= -2090.094543

Sum of electronic and thermal Energies= -2090.053679

Sum of electronic and thermal Enthalpies= -2090.052734

Sum of electronic and thermal Free Energies= -2090.171584

#### **B-ts5**

|   |            |            |            |
|---|------------|------------|------------|
| C | -2.8688051 | -2.7813508 | -1.3632559 |
| C | -2.2642151 | -3.9389538 | -1.8514329 |
| C | -0.8875651 | -3.9773398 | -1.9850099 |
| C | -0.1509361 | -2.8272178 | -1.6934709 |
| C | -0.7434861 | -1.6487818 | -1.1764679 |

|    |            |            |            |
|----|------------|------------|------------|
| C  | -2.1227891 | -1.6649838 | -0.9918369 |
| C  | 1.2860169  | -2.7734908 | -1.6456269 |
| C  | 1.9298999  | -1.5375448 | -2.0748689 |
| C  | 1.4028839  | -0.4359268 | -1.5255489 |
| C  | 0.2425969  | -0.6025578 | -0.6003109 |
| C  | 0.6283779  | -1.2273338 | 0.7734061  |
| C  | -0.5054471 | -0.7924438 | 1.6739851  |
| N  | -1.0409401 | 0.3383222  | 1.1034871  |
| C  | -0.3058591 | 0.7371462  | -0.0889129 |
| C  | 1.7225499  | -1.9431858 | 1.1439831  |
| N  | -0.8494401 | 2.9271372  | -1.1065509 |
| C  | -1.0738901 | 1.5802562  | -1.1000899 |
| O  | -1.8630611 | 1.0748152  | -1.8813119 |
| O  | -0.8806851 | -1.2831518 | 2.7220331  |
| O  | 1.9576989  | -3.6146038 | -0.9598159 |
| H  | 0.5895139  | 1.3045242  | 0.2168291  |
| Au | 3.6495159  | -1.2093168 | 0.4915911  |
| C  | 1.8106209  | -2.5950108 | 2.4991891  |
| C  | 0.1473859  | 3.8306502  | -0.4773819 |
| C  | 1.5744309  | 3.4929112  | -0.9181159 |
| C  | 0.0339959  | 3.8462692  | 1.0444181  |
| C  | -0.2018951 | 5.2214882  | -1.0032619 |
| C  | -5.4255181 | 0.5012012  | -0.1410889 |
| C  | -5.8863581 | -0.6828048 | 0.4457211  |
| C  | -5.1577111 | -1.2714018 | 1.4830031  |

|   |            |            |            |
|---|------------|------------|------------|
| C | -3.9747191 | -0.6781378 | 1.9134111  |
| C | -3.4993631 | 0.4931462  | 1.3253831  |
| C | -4.2477961 | 1.0793632  | 0.2993001  |
| C | -2.1621351 | 1.0518532  | 1.7270841  |
| O | -7.0359091 | -1.1791098 | -0.0608989 |
| C | -7.5508201 | -2.3646938 | 0.4993161  |
| H | -3.9499151 | -2.7395448 | -1.2484349 |
| H | -2.8649581 | -4.8050558 | -2.1130909 |
| H | -0.3738061 | -4.8669268 | -2.3406619 |
| H | -2.6385471 | -0.8030278 | -0.5858729 |
| H | 2.8599359  | -1.5728988 | -2.6360719 |
| H | 1.8692969  | 0.5436112  | -1.6424629 |
| H | -1.4098281 | 3.3556532  | -1.8371889 |
| H | 2.2652829  | -2.9526878 | -0.0766499 |
| H | 0.8782319  | -2.5253988 | 3.0647001  |
| H | 2.0732609  | -3.6535918 | 2.3783581  |
| H | 2.6191979  | -2.1534348 | 3.0973371  |
| H | 1.6281389  | 3.3981022  | -2.0095969 |
| H | 2.2550899  | 4.2966182  | -0.6124689 |
| H | 1.9510259  | 2.5665812  | -0.4627429 |
| H | -0.9737811 | 4.1484312  | 1.3524851  |
| H | 0.7415179  | 4.5762072  | 1.4551061  |
| H | 0.2607909  | 2.8783842  | 1.5059741  |
| H | 0.4678679  | 5.9707132  | -0.5691459 |
| H | -0.0986541 | 5.2697172  | -2.0945449 |

|   |            |            |            |
|---|------------|------------|------------|
| H | -1.2300091 | 5.4921922  | -0.7356489 |
| H | -6.0148941 | 0.9433302  | -0.9397619 |
| H | -5.5030281 | -2.1817628 | 1.9638301  |
| H | -3.3945901 | -1.1443208 | 2.7081931  |
| H | -3.8925331 | 1.9940292  | -0.1747719 |
| H | -2.0131741 | 0.9719162  | 2.8106931  |
| H | -2.0838961 | 2.1098922  | 1.4515661  |
| H | -8.4719271 | -2.5883778 | -0.0413849 |
| H | -7.7818511 | -2.2423978 | 1.5664031  |
| H | -6.8515951 | -3.2054888 | 0.3800171  |
| P | 5.7370899  | -0.1736238 | 0.1179301  |
| C | 5.8685309  | 0.5264522  | -1.5632259 |
| H | 5.0586799  | 1.2466472  | -1.7235629 |
| H | 6.8317619  | 1.0316492  | -1.7001039 |
| H | 5.7759249  | -0.2742328 | -2.3040939 |
| C | 7.1931379  | -1.2555218 | 0.2871631  |
| H | 8.1109349  | -0.6931848 | 0.0794971  |
| H | 7.2381549  | -1.6571608 | 1.3038941  |
| H | 7.1154229  | -2.0936738 | -0.4117409 |
| C | 6.0710949  | 1.2369532  | 1.2239151  |
| H | 7.0387979  | 1.6918312  | 0.9824001  |
| H | 5.2805669  | 1.9858462  | 1.1127851  |
| H | 6.0811089  | 0.8978162  | 2.2640971  |

Zero-point correction= 0.635948 (Hartree/Particle)

Thermal correction to Energy= 0.676637

Thermal correction to Enthalpy= 0.677581

Thermal correction to Gibbs Free Energy= 0.561580

Sum of electronic and zero-point Energies= -2089.963716

Sum of electronic and thermal Energies= -2089.923026

Sum of electronic and thermal Enthalpies= -2089.922082

Sum of electronic and thermal Free Energies= -2090.038084

**B-int4**

|   |            |            |            |
|---|------------|------------|------------|
| C | 0.4570980  | -1.8448237 | 2.4979803  |
| C | -0.2307870 | -1.3131727 | 3.5871183  |
| C | -1.1202810 | -0.2717617 | 3.3861933  |
| C | -1.3096090 | 0.2532883  | 2.1049163  |
| C | -0.5904770 | -0.2584577 | 1.0045543  |
| C | 0.2766300  | -1.3285777 | 1.2199043  |
| C | -2.2983830 | 1.3347273  | 1.9446293  |
| C | -2.6827530 | 1.6552873  | 0.5312993  |
| C | -1.9301080 | 1.2108883  | -0.5232097 |
| C | -0.6760400 | 0.4186133  | -0.3544167 |
| C | -0.3931600 | -0.5269127 | -1.5103597 |
| C | 1.0759870  | -0.4856387 | -1.7785617 |
| N | 1.5796100  | 0.5571603  | -1.0420997 |
| C | 0.5387140  | 1.4378133  | -0.5676867 |
| C | -1.2901100 | -1.2518947 | -2.1880247 |
| N | 0.5552310  | 3.5207823  | 0.7811933  |
| C | 0.9076840  | 2.2029353  | 0.6990423  |
| O | 1.4180780  | 1.6255703  | 1.6443983  |

|    |            |            |            |
|----|------------|------------|------------|
| O  | 1.7303420  | -1.2217817 | -2.4919547 |
| O  | -2.8492540 | 1.9135393  | 2.8620703  |
| H  | 0.2301180  | 2.1398443  | -1.3585137 |
| Au | -3.8455190 | -0.2924587 | 0.0477393  |
| C  | -1.0231170 | -2.1767027 | -3.3224807 |
| C  | 0.4439110  | 4.5952673  | -0.2453367 |
| C  | -0.9025450 | 4.5586903  | -0.9627687 |
| C  | 1.6040990  | 4.5352503  | -1.2365637 |
| C  | 0.5316800  | 5.9013033  | 0.5404763  |
| C  | 4.4581120  | -1.5717757 | 1.5117633  |
| C  | 5.3165280  | -2.3451757 | 0.7207463  |
| C  | 5.4206250  | -2.0827137 | -0.6453407 |
| C  | 4.6655520  | -1.0539587 | -1.2024297 |
| C  | 3.8195270  | -0.2724627 | -0.4244537 |
| C  | 3.7227280  | -0.5462117 | 0.9459983  |
| C  | 3.0187050  | 0.8416413  | -1.0428587 |
| O  | 5.9936180  | -3.3189837 | 1.3699933  |
| C  | 6.8956060  | -4.1045667 | 0.6265643  |
| H  | 1.1564790  | -2.6649607 | 2.6420703  |
| H  | -0.0729940 | -1.7152187 | 4.5841403  |
| H  | -1.6860930 | 0.1653103  | 4.2054753  |
| H  | 0.8517460  | -1.7518997 | 0.4001303  |
| H  | -3.4516080 | 2.4187003  | 0.3994163  |
| H  | -2.1532270 | 1.5603143  | -1.5343297 |
| H  | 0.8123020  | 3.8626513  | 1.7032693  |

|   |            |            |            |
|---|------------|------------|------------|
| H | 0.0390150  | -2.2126987 | -3.5697207 |
| H | -1.3569180 | -3.1915087 | -3.0689387 |
| H | -1.5964800 | -1.8736347 | -4.2075307 |
| H | -1.7248860 | 4.5726933  | -0.2374447 |
| H | -1.0007830 | 5.4397723  | -1.6072737 |
| H | -1.0172610 | 3.6792333  | -1.6077517 |
| H | 2.5639500  | 4.5748493  | -0.7080897 |
| H | 1.5570090  | 5.3936263  | -1.9167127 |
| H | 1.5907620  | 3.6305773  | -1.8565567 |
| H | 0.4456510  | 6.7565493  | -0.1374367 |
| H | -0.2765810 | 5.9710603  | 1.2785533  |
| H | 1.4929740  | 5.9831103  | 1.0622373  |
| H | 4.4037770  | -1.7918987 | 2.5754443  |
| H | 6.0731170  | -2.6716947 | -1.2826367 |
| H | 4.7270210  | -0.8687867 | -2.2737287 |
| H | 3.0588960  | 0.0560643  | 1.5649893  |
| H | 3.3440660  | 1.0103533  | -2.0791877 |
| H | 3.1620990  | 1.7788223  | -0.4915837 |
| H | 7.3468960  | -4.8076317 | 1.3290373  |
| H | 7.6878930  | -3.4918977 | 0.1741823  |
| H | 6.3845610  | -4.6687377 | -0.1664757 |
| P | -5.2359920 | -2.1816297 | -0.0133407 |
| C | -5.4178380 | -2.9606037 | 1.6198273  |
| H | -5.8824180 | -2.2579567 | 2.3179773  |
| H | -6.0428340 | -3.8574607 | 1.5381983  |



|   |            |            |            |
|---|------------|------------|------------|
| H | -4.4329860 | -3.2376177 | 2.0078913  |
| C | -4.5542850 | -3.4705257 | -1.1030957 |
| H | -5.1991380 | -4.3568707 | -1.0872277 |
| H | -4.4860380 | -3.0931627 | -2.1286167 |
| H | -3.5507320 | -3.7461307 | -0.7627847 |
| C | -6.9242730 | -1.8643337 | -0.6089147 |
| H | -7.4991080 | -2.7977117 | -0.6108427 |
| H | -7.4188230 | -1.1379977 | 0.0427953  |
| H | -6.8916390 | -1.4581587 | -1.6242137 |
| H | -2.3433210 | -1.1575267 | -1.8907197 |

Zero-point correction= 0.642124 (Hartree/Particle)

Thermal correction to Energy= 0.684236

Thermal correction to Enthalpy= 0.685180

Thermal correction to Gibbs Free Energy= 0.563921

Sum of electronic and zero-point Energies= -2090.054412

Sum of electronic and thermal Energies= -2090.012300

Sum of electronic and thermal Enthalpies= -2090.011356

Sum of electronic and thermal Free Energies= -2090.132615

### **B-ts6**

|   |            |            |           |
|---|------------|------------|-----------|
| C | 0.5846620  | -0.6182094 | 3.0516145 |
| C | -0.2781050 | -0.0747294 | 2.0961405 |
| C | 2.0120310  | -0.2282184 | 3.1122245 |
| C | 2.5366830  | 0.5947896  | 1.9604945 |
| C | 1.6005450  | 1.4397896  | 1.3093735 |
| C | 0.1437470  | 1.0418046  | 1.1415805 |

|    |            |            |            |
|----|------------|------------|------------|
| C  | -0.7535290 | 2.2600916  | 1.3194185  |
| C  | -1.6043990 | 2.4218286  | 0.1172575  |
| N  | -1.1983990 | 1.4636096  | -0.7986255 |
| C  | -0.1586170 | 0.5873196  | -0.3271665 |
| C  | -0.7797960 | 3.0201166  | 2.4227905  |
| N  | 2.0744100  | 1.5730336  | -0.7739155 |
| C  | 1.0725360  | 0.6439436  | -1.2135765 |
| O  | 1.2514010  | -0.1171534 | -2.1371685 |
| O  | -2.5049170 | 3.2126696  | -0.0839165 |
| O  | 2.7536610  | -0.5598114 | 4.0153025  |
| Au | 2.9197090  | -1.1845194 | 0.6954055  |
| C  | -1.6293010 | 4.2125426  | 2.6712055  |
| C  | -3.0129890 | -2.5632514 | -1.5947395 |
| C  | -4.1615020 | -2.4688484 | -0.8003335 |
| C  | -4.6410600 | -1.2098554 | -0.4240795 |
| C  | -3.9672550 | -0.0658834 | -0.8419935 |
| C  | -2.8191460 | -0.1491864 | -1.6284455 |
| C  | -2.3551050 | -1.4148114 | -2.0015795 |
| C  | -2.0334130 | 1.0908706  | -1.9431385 |
| O  | -4.7315580 | -3.6409174 | -0.4552695 |
| C  | -5.9122910 | -3.6077704 | 0.3161035  |
| H  | -2.2547990 | 4.4572926  | 1.8116475  |
| H  | -2.2736890 | 4.0340146  | 3.5410415  |
| H  | -1.0046340 | 5.0763986  | 2.9295535  |
| H  | -2.6720370 | -3.5531844 | -1.8876125 |

|   |            |            |            |
|---|------------|------------|------------|
| H | -5.5409090 | -1.1105854 | 0.1756855  |
| H | -4.3406410 | 0.9153236  | -0.5472345 |
| H | -1.4638500 | -1.4940624 | -2.6262245 |
| H | -2.6829020 | 1.9546446  | -2.1234085 |
| H | -1.3963660 | 0.9509956  | -2.8274065 |
| H | -6.2020100 | -4.6465694 | 0.4812155  |
| H | -6.7238180 | -3.0881684 | -0.2109735 |
| H | -5.7460080 | -3.1232084 | 1.2885415  |
| P | 3.1163390  | -2.9101924 | -0.8884825 |
| C | 3.9957520  | -4.4183124 | -0.3749645 |
| H | 3.4828360  | -4.8649844 | 0.4821145  |
| H | 4.0189110  | -5.1411214 | -1.1987365 |
| H | 5.0198080  | -4.1740794 | -0.0780085 |
| C | 3.9379670  | -2.3277764 | -2.4066765 |
| H | 3.9116160  | -3.1070734 | -3.1772025 |
| H | 3.4057140  | -1.4413804 | -2.7722195 |
| H | 4.9786180  | -2.0640974 | -2.1951175 |
| C | 1.4679300  | -3.4607114 | -1.4339255 |
| H | 1.5605260  | -4.2342564 | -2.2052045 |
| H | 0.9089340  | -3.8595244 | -0.5814725 |
| H | 0.9290470  | -2.5978514 | -1.8419175 |
| H | -0.4973620 | -0.4625194 | -0.3575545 |
| H | 1.7794180  | 2.5137926  | 1.3239555  |
| C | 2.2338260  | 2.9239966  | -1.4635095 |
| C | 0.9827420  | 3.7706256  | -1.3198365 |

|   |            |            |            |
|---|------------|------------|------------|
| C | 3.4207440  | 3.5890026  | -0.7792875 |
| C | 2.5397760  | 2.6797546  | -2.9371805 |
| H | 0.1216240  | 3.3271216  | -1.8325265 |
| H | 0.7137200  | 3.9443986  | -0.2711215 |
| H | 1.1701270  | 4.7471786  | -1.7789115 |
| H | 4.3209870  | 2.9630516  | -0.8345915 |
| H | 3.6481570  | 4.5366596  | -1.2788875 |
| H | 3.2188160  | 3.8130226  | 0.2743235  |
| H | 2.7274420  | 3.6390586  | -3.4327995 |
| H | 3.4324610  | 2.0544736  | -3.0646445 |
| H | 1.7037360  | 2.1924596  | -3.4506965 |
| H | -0.1125470 | 2.7231626  | 3.2403375  |
| H | 3.4902450  | 1.0682336  | 2.2089035  |
| H | 2.9714400  | 1.0926166  | -0.9036895 |
| C | 0.1290020  | -1.5933524 | 3.9455875  |
| C | -1.5909810 | -0.5478974 | 2.0298465  |
| H | 0.8331540  | -1.9764584 | 4.6803325  |
| H | -2.2862800 | -0.1436624 | 1.2936835  |
| C | -2.0315390 | -1.5324194 | 2.9033265  |
| C | -1.1750690 | -2.0522014 | 3.8742315  |
| H | -3.0570510 | -1.8877564 | 2.8272195  |
| H | -1.5269260 | -2.8131124 | 4.5655135  |

Zero-point correction= 0.694526 (Hartree/Particle)

Thermal correction to Energy= 0.733949

Thermal correction to Enthalpy= 0.734893

Thermal correction to Gibbs Free Energy= 0.614922

Sum of electronic and zero-point Energies= -1744.456958

Sum of electronic and thermal Energies= -1744.417535

Sum of electronic and thermal Enthalpies= -1744.416591

Sum of electronic and thermal Free Energies= -1744.536562

**B-int5**

|    |            |            |            |
|----|------------|------------|------------|
| C  | 0.7788133  | -0.6278764 | 2.8503976  |
| C  | 0.0769103  | 0.1064396  | 1.8878006  |
| C  | 2.2429093  | -0.8833904 | 2.7108876  |
| C  | 2.7870653  | -0.6225054 | 1.3496086  |
| C  | 2.3180893  | 0.6896566  | 0.7621076  |
| C  | 0.7813513  | 0.9265436  | 0.8164816  |
| C  | 0.4204043  | 2.3980036  | 0.9872566  |
| C  | -0.3967137 | 2.8368476  | -0.1694364 |
| N  | -0.4033497 | 1.7877036  | -1.0842394 |
| C  | 0.2513203  | 0.5987586  | -0.5943304 |
| C  | 0.7292503  | 3.1359446  | 2.0619856  |
| N  | 2.7161163  | 0.6938166  | -0.7220134 |
| C  | 1.4367613  | 0.3150766  | -1.4759924 |
| O  | 1.4775663  | -0.1129164 | -2.5860464 |
| O  | -0.9840337 | 3.8848306  | -0.3472634 |
| O  | 2.8960973  | -1.3932544 | 3.6035616  |
| Au | 1.9247433  | -2.2977104 | 0.2856246  |
| C  | 0.3923583  | 4.5623716  | 2.2998576  |
| C  | -3.6401167 | -1.3046204 | -1.4295074 |

|   |            |            |            |
|---|------------|------------|------------|
| C | -4.5943467 | -0.7470054 | -0.5699214 |
| C | -4.5440647 | 0.6195006  | -0.2759074 |
| C | -3.5373407 | 1.4048536  | -0.8292824 |
| C | -2.5727847 | 0.8580186  | -1.6755954 |
| C | -2.6449597 | -0.5075284 | -1.9722934 |
| C | -1.4164827 | 1.6953166  | -2.1407594 |
| O | -5.5169727 | -1.6011674 | -0.0865214 |
| C | -6.5342307 | -1.0848184 | 0.7449956  |
| H | -0.1572597 | 5.0009046  | 1.4659826  |
| H | -0.2105027 | 4.6542246  | 3.2120666  |
| H | 1.3060023  | 5.1412086  | 2.4850986  |
| H | -3.7212237 | -2.3628724 | -1.6673144 |
| H | -5.2868767 | 1.0789696  | 0.3693656  |
| H | -3.4952627 | 2.4680856  | -0.5929904 |
| H | -1.9122587 | -0.9465344 | -2.6535744 |
| H | -1.7139767 | 2.7276936  | -2.3533794 |
| H | -0.9515057 | 1.2788106  | -3.0436234 |
| H | -7.1765457 | -1.9270914 | 1.0058376  |
| H | -7.1319667 | -0.3244484 | 0.2250196  |
| H | -6.1208237 | -0.6499774 | 1.6660566  |
| P | 0.6118073  | -3.9439014 | -0.8094964 |
| C | 1.0513153  | -5.7025214 | -0.6176784 |
| H | 1.0672163  | -5.9652694 | 0.4442536  |
| H | 0.3207693  | -6.3348404 | -1.1354924 |
| H | 2.0462093  | -5.8858244 | -1.0340784 |

|   |            |            |            |
|---|------------|------------|------------|
| C | 0.4702143  | -3.6865044 | -2.6102664 |
| H | -0.2624337 | -4.3767664 | -3.0444494 |
| H | 0.1627563  | -2.6535954 | -2.8077364 |
| H | 1.4426483  | -3.8472694 | -3.0858654 |
| C | -1.1024677 | -3.8144584 | -0.1940184 |
| H | -1.7555577 | -4.5410614 | -0.6924564 |
| H | -1.1189047 | -3.9905524 | 0.8866376  |
| H | -1.4837957 | -2.8008994 | -0.3754324 |
| H | -0.4235027 | -0.2729754 | -0.6202754 |
| H | 2.8263763  | 1.5480066  | 1.2173696  |
| C | 3.5631163  | 1.8798546  | -1.3053314 |
| C | 2.7447663  | 3.1532436  | -1.3083714 |
| C | 4.8001923  | 1.9928676  | -0.4269394 |
| C | 3.9730803  | 1.4865796  | -2.7174114 |
| H | 1.8487633  | 3.0642086  | -1.9344854 |
| H | 2.4445753  | 3.4630516  | -0.3015214 |
| H | 3.3618533  | 3.9529506  | -1.7316104 |
| H | 5.3523813  | 1.0459206  | -0.3755624 |
| H | 5.4690663  | 2.7354156  | -0.8746994 |
| H | 4.5818463  | 2.3303736  | 0.5905986  |
| H | 4.6596443  | 2.2524216  | -3.0932244 |
| H | 4.5067663  | 0.5282046  | -2.7382674 |
| H | 3.1267453  | 1.4274006  | -3.4052424 |
| H | 1.2880203  | 2.6327646  | 2.8594926  |
| H | 3.8832993  | -0.6699754 | 1.3829856  |

|   |            |            |            |
|---|------------|------------|------------|
| H | 3.3176583  | -0.1320534 | -0.8493784 |
| C | 0.0900973  | -1.2786474 | 3.8775566  |
| C | -1.3186287 | 0.1326746  | 1.9421766  |
| H | 0.6781753  | -1.8319574 | 4.6062696  |
| H | -1.8895967 | 0.6948686  | 1.2014066  |
| C | -1.9984967 | -0.5466154 | 2.9448086  |
| C | -1.2944067 | -1.2393164 | 3.9295616  |
| H | -3.0860617 | -0.5218434 | 2.9615076  |
| H | -1.8276677 | -1.7538174 | 4.7246666  |

Zero-point correction= 0.644541 (Hartree/Particle)

Thermal correction to Energy= 0.685189

Thermal correction to Enthalpy= 0.686134

Thermal correction to Gibbs Free Energy= 0.570822

Sum of electronic and zero-point Energies= -2090.058888

Sum of electronic and thermal Energies= -2090.018239

Sum of electronic and thermal Enthalpies= -2090.017295

Sum of electronic and thermal Free Energies= -2090.132607

**B-ts7**

|   |           |            |           |
|---|-----------|------------|-----------|
| C | 0.9235055 | -0.1944323 | 3.0480058 |
| C | 1.4284045 | 0.7359007  | 2.1225618 |
| C | 0.8095065 | -1.6353483 | 2.7460408 |
| C | 1.2797465 | -2.0974953 | 1.3933078 |
| C | 2.1745475 | -1.1629903 | 0.5699258 |
| C | 1.8685305 | 0.3355017  | 0.7245198 |
| C | 3.0031455 | 1.2148647  | 0.2094578 |



|    |            |            |            |
|----|------------|------------|------------|
| C  | 2.4272565  | 2.2322247  | -0.7157602 |
| N  | 1.0934805  | 1.9038667  | -0.8793412 |
| C  | 0.7866485  | 0.6058197  | -0.3422622 |
| C  | 4.2870525  | 1.1222907  | 0.5776088  |
| N  | 1.7733645  | -1.5216053 | -0.8338142 |
| C  | 0.9947605  | -0.4703553 | -1.3949762 |
| O  | 0.5400615  | -0.4515623 | -2.5115642 |
| O  | 2.9635905  | 3.1939267  | -1.2292332 |
| O  | 0.3294895  | -2.4386103 | 3.5321838  |
| Au | -0.9439865 | -2.3082823 | 0.7230238  |
| C  | 5.4169525  | 1.9687587  | 0.1157098  |
| C  | -3.4785195 | 1.8029747  | -1.8855112 |
| C  | -3.9075555 | 2.3468447  | -0.6710412 |
| C  | -2.9826825 | 2.9671077  | 0.1742708  |
| C  | -1.6472385 | 3.0455117  | -0.2131972 |
| C  | -1.2087025 | 2.5150147  | -1.4252422 |
| C  | -2.1429985 | 1.8817897  | -2.2495882 |
| C  | 0.2342785  | 2.5981047  | -1.8292162 |
| O  | -5.2213265 | 2.1876917  | -0.3874342 |
| C  | -5.7157305 | 2.7601847  | 0.8042978  |
| H  | 5.0929595  | 2.7320497  | -0.5928552 |
| H  | 5.8933725  | 2.4562817  | 0.9754328  |
| H  | 6.1928535  | 1.3441847  | -0.3452422 |
| H  | -4.2186415 | 1.3312137  | -2.5286612 |
| H  | -3.2911585 | 3.3991197  | 1.1216658  |

|   |            |            |            |
|---|------------|------------|------------|
| H | -0.9272995 | 3.5307047  | 0.4465368  |
| H | -1.8123095 | 1.4517997  | -3.1950022 |
| H | 0.5989385  | 3.6327697  | -1.8539382 |
| H | 0.3677965  | 2.1848597  | -2.8385752 |
| H | -6.7886535 | 2.5624907  | 0.8215988  |
| H | -5.5511295 | 3.8453467  | 0.8292118  |
| H | -5.2509895 | 2.3060477  | 1.6924718  |
| P | -3.1636185 | -2.1105433 | -0.0137672 |
| C | -4.2789055 | -3.5248673 | 0.2344688  |
| H | -4.3730405 | -3.7441603 | 1.3020228  |
| H | -5.2682425 | -3.2920723 | -0.1761262 |
| H | -3.8782195 | -4.4088403 | -0.2702712 |
| C | -3.1358065 | -1.7860823 | -1.8037662 |
| H | -4.1525945 | -1.6173693 | -2.1782692 |
| H | -2.5255775 | -0.8946613 | -1.9940822 |
| H | -2.6870035 | -2.6366963 | -2.3267742 |
| C | -3.9747895 | -0.6722973 | 0.7483078  |
| H | -4.9189825 | -0.4409153 | 0.2391848  |
| H | -4.1620215 | -0.8738813 | 1.8077468  |
| H | -3.3108875 | 0.1972047  | 0.6626918  |
| H | -0.2482735 | 0.5615347  | 0.0410598  |
| H | 3.2385725  | -1.3623183 | 0.7327738  |
| C | 2.5941265  | -2.4493983 | -1.7103962 |
| C | 3.6805315  | -1.6254843 | -2.3875342 |
| C | 3.2095245  | -3.5434463 | -0.8460062 |

|   |           |            |            |
|---|-----------|------------|------------|
| C | 1.6679345 | -3.1108353 | -2.7283122 |
| H | 3.2510585 | -0.8289053 | -3.0049412 |
| H | 4.3555565 | -1.1720743 | -1.6506162 |
| H | 4.2794475 | -2.2705683 | -3.0402262 |
| H | 2.4434115 | -4.1706323 | -0.3737282 |
| H | 3.8037295 | -4.1948973 | -1.4951942 |
| H | 3.8888875 | -3.1624403 | -0.0758022 |
| H | 2.2266775 | -3.8941313 | -3.2523022 |
| H | 0.8160485 | -3.5867643 | -2.2228642 |
| H | 1.2839115 | -2.4034683 | -3.4636222 |
| H | 4.5421395 | 0.3396377  | 1.3010418  |
| H | 1.7113665 | -3.0977413 | 1.5066658  |
| H | 0.8125915 | -2.1931343 | 0.0017798  |
| C | 0.4988105 | 0.2232167  | 4.3155938  |
| C | 1.4734065 | 2.0804017  | 2.4985998  |
| H | 0.1322685 | -0.5367923 | 5.0010878  |
| H | 1.8762085 | 2.8232557  | 1.8143788  |
| C | 1.0364565 | 2.4877357  | 3.7534048  |
| C | 0.5509195 | 1.5587507  | 4.6715368  |
| H | 1.0900195 | 3.5404217  | 4.0201508  |
| H | 0.2230385 | 1.8786957  | 5.6567278  |

Zero-point correction= 0.637688 (Hartree/Particle)

Thermal correction to Energy= 0.678185

Thermal correction to Enthalpy= 0.679130

Thermal correction to Gibbs Free Energy= 0.564166

Sum of electronic and zero-point Energies= -2090.026201

Sum of electronic and thermal Energies= -2089.985704

Sum of electronic and thermal Enthalpies= -2089.984759

Sum of electronic and thermal Free Energies= -2090.099723

**C-1**

|    |            |            |            |
|----|------------|------------|------------|
| C  | -0.4151076 | -1.0895392 | 2.3343378  |
| C  | 0.5946514  | -0.4657462 | 1.6136298  |
| C  | -1.6271106 | -0.4310982 | 2.5732568  |
| C  | -1.7959816 | 0.8811818  | 2.1279648  |
| C  | -0.7844216 | 1.4879898  | 1.3993238  |
| C  | 0.4127194  | 0.8282078  | 1.1122098  |
| C  | -0.3511486 | 1.2966158  | -1.8660492 |
| C  | 0.9883584  | 0.6992898  | -2.0285492 |
| N  | 1.8399574  | 0.8198648  | -0.9716362 |
| C  | 1.4292484  | 1.5426248  | 0.2555588  |
| C  | -1.4278796 | 1.8844878  | -1.9577722 |
| N  | 3.2768414  | 3.1224498  | 0.8119318  |
| C  | 2.6834914  | 1.9169568  | 1.0524308  |
| O  | 3.1737944  | 1.1347908  | 1.8510198  |
| O  | 1.2521934  | 0.1213318  | -3.0731942 |
| O  | -2.6080056 | -1.0912942 | 3.2195488  |
| H  | 0.9519384  | 2.4678848  | -0.0840562 |
| Au | -1.7435046 | -0.3974312 | -1.1032232 |
| C  | -2.6614646 | 2.6418098  | -2.0476612 |
| C  | 2.8706444  | 4.3414218  | 0.0780728  |

|   |            |            |            |
|---|------------|------------|------------|
| C | 1.6462954  | 4.9891558  | 0.7229048  |
| C | 2.6402634  | 4.0662698  | -1.4067322 |
| C | 4.0574524  | 5.2937258  | 0.2076368  |
| C | 3.8998454  | -2.8858162 | 1.0550698  |
| C | 3.1417864  | -3.8776682 | 0.4279508  |
| C | 2.4028564  | -3.5635622 | -0.7143792 |
| C | 2.4202494  | -2.2621742 | -1.2103912 |
| C | 3.1649654  | -1.2627452 | -0.5854922 |
| C | 3.9092874  | -1.5961152 | 0.5501158  |
| C | 3.1454094  | 0.1474898  | -1.1124212 |
| O | 3.1887484  | -5.1080282 | 0.9962728  |
| C | 2.4309724  | -6.1326072 | 0.4059288  |
| H | -2.7311356 | 1.4041148  | 2.3079598  |
| H | -0.9525996 | 2.4977298  | 1.0201158  |
| H | 4.0782444  | 3.2338458  | 1.4244598  |
| H | -3.4620916 | -0.6981362 | 2.9478498  |
| H | -2.4384526 | 3.6777788  | -2.3261672 |
| H | -3.3246586 | 2.2086818  | -2.8040342 |
| H | -3.1978876 | 2.6262768  | -1.0869312 |
| H | 1.8456344  | 5.2240738  | 1.7746898  |
| H | 1.3943614  | 5.9219528  | 0.2035908  |
| H | 0.7626634  | 4.3412378  | 0.6875368  |
| H | 3.4866614  | 3.5140498  | -1.8321622 |
| H | 2.5452394  | 5.0180938  | -1.9427022 |
| H | 1.7273884  | 3.4949318  | -1.6028752 |

|   |            |            |            |
|---|------------|------------|------------|
| H | 3.8383004  | 6.2418778  | -0.2946062 |
| H | 4.2716544  | 5.5152628  | 1.2610578  |
| H | 4.9561044  | 4.8630678  | -0.2503422 |
| H | 4.4664614  | -3.1534722 | 1.9431398  |
| H | 1.8272924  | -4.3252882 | -1.2334172 |
| H | 1.8480494  | -2.0178792 | -2.1054342 |
| H | 4.4695274  | -0.8193802 | 1.0662978  |
| H | 3.3656144  | 0.1577498  | -2.1849042 |
| H | 3.9061454  | 0.7555328  | -0.6128002 |
| H | 2.5882624  | -7.0267782 | 1.0126008  |
| H | 2.7543574  | -6.3387682 | -0.6247722 |
| H | 1.3565364  | -5.8925002 | 0.3969098  |
| P | -2.5216946 | -2.5713492 | -0.7412672 |
| C | -3.3808426 | -2.9798222 | 0.8034908  |
| H | -4.2391356 | -2.3112232 | 0.9293198  |
| H | -3.7133016 | -4.0240592 | 0.7508768  |
| H | -2.7232106 | -2.8376852 | 1.6664108  |
| C | -1.1847316 | -3.8066942 | -0.8734882 |
| H | -1.5758326 | -4.8222262 | -0.7348382 |
| H | -0.7127256 | -3.7236242 | -1.8585822 |
| H | -0.4246846 | -3.5927722 | -0.1124552 |
| C | -3.7164456 | -3.0074802 | -2.0457222 |
| H | -4.0785556 | -4.0332422 | -1.9077042 |
| H | -4.5507276 | -2.3019522 | -1.9755602 |
| H | -3.2475206 | -2.9102972 | -3.0296772 |

|   |            |            |            |
|---|------------|------------|------------|
| C | -6.6949956 | 0.8876618  | 0.3293188  |
| F | -7.1611636 | 1.5080918  | 1.4032508  |
| F | -7.3164716 | -0.2790422 | 0.2026188  |
| F | -6.9541596 | 1.6283208  | -0.7417812 |
| S | -4.8867486 | 0.6274768  | 0.4837048  |
| O | -4.3346186 | 1.9839078  | 0.5916458  |
| O | -4.5407736 | -0.0841772 | -0.7677202 |
| O | -4.7732206 | -0.2013582 | 1.7016048  |
| H | 1.5284674  | -0.9917742 | 1.4304188  |
| H | -0.2859286 | -2.1004582 | 2.7174648  |

Zero-point correction= 0.625393 (Hartree/Particle)

Thermal correction to Energy= 0.673634

Thermal correction to Enthalpy= 0.674579

Thermal correction to Gibbs Free Energy= 0.541211

Sum of electronic and zero-point Energies= -2897.962758

Sum of electronic and thermal Energies= -2897.914516

Sum of electronic and thermal Enthalpies= -2897.913572

Sum of electronic and thermal Free Energies= -2898.046939

### **C1INT1**

|   |            |            |            |
|---|------------|------------|------------|
| C | -1.8213518 | 2.0497257  | -1.8574129 |
| C | -0.6627778 | 1.4621457  | -1.3733939 |
| C | -2.8695048 | 1.2526597  | -2.3274559 |
| C | -2.6860668 | -0.1296393 | -2.4047199 |
| C | -1.5085648 | -0.7057763 | -1.9444559 |
| C | -0.4949178 | 0.0712517  | -1.3776649 |

|    |            |            |            |
|----|------------|------------|------------|
| C  | -1.2252638 | -2.4205253 | 0.7009751  |
| C  | 0.1180192  | -2.7800443 | 0.2076291  |
| N  | 0.7979702  | -1.9981143 | -0.7032649 |
| C  | 0.7837932  | -0.5406043 | -0.8240099 |
| C  | -2.2918068 | -2.8398853 | 1.1696311  |
| N  | 1.9276232  | 1.2085657  | 0.6115001  |
| C  | 1.1538522  | 0.0902517  | 0.5291731  |
| O  | 0.6783292  | -0.3861083 | 1.5551371  |
| O  | 0.5336172  | -3.8778733 | 0.5440631  |
| O  | -4.0260448 | 1.8500937  | -2.6626579 |
| H  | 1.5833152  | -0.3293003 | -1.5392529 |
| Au | -2.3085768 | -0.4386643 | 1.0204281  |
| C  | -3.5403658 | -3.3309043 | 1.7185811  |
| C  | 2.8938232  | 1.9838657  | -0.2076479 |
| C  | 2.9393742  | 1.6044497  | -1.6798699 |
| C  | 4.2766662  | 1.7653607  | 0.4059981  |
| C  | 2.5026112  | 3.4553027  | -0.0702079 |
| C  | 4.6992332  | -2.0843983 | 1.2558481  |
| C  | 5.7619562  | -1.6481153 | 0.4549341  |
| C  | 5.5873532  | -1.5364223 | -0.9236319 |
| C  | 4.3470692  | -1.8524773 | -1.4794979 |
| C  | 3.2817582  | -2.2820203 | -0.6955979 |
| C  | 3.4791542  | -2.4007233 | 0.6875171  |
| C  | 1.9633802  | -2.6400353 | -1.3270609 |
| O  | 6.9070312  | -1.3421963 | 1.1118951  |



|   |            |            |            |
|---|------------|------------|------------|
| C | 7.9702262  | -0.8142343 | 0.3593591  |
| H | -3.4939318 | -0.7611493 | -2.7639229 |
| H | -1.4009798 | -1.7870433 | -1.9910749 |
| H | 1.9915902  | 1.4648587  | 1.5939031  |
| H | -4.7619278 | 1.2363727  | -2.4471359 |
| H | -4.3572038 | -3.1143803 | 1.0195301  |
| H | -3.4653498 | -4.4136283 | 1.8738661  |
| H | -3.7606218 | -2.8534923 | 2.6792861  |
| H | 1.9645382  | 1.6905937  | -2.1737709 |
| H | 3.6202082  | 2.3003897  | -2.1835029 |
| H | 3.3448562  | 0.5959877  | -1.8248889 |
| H | 4.2951722  | 2.0812757  | 1.4570321  |
| H | 5.0309272  | 2.3524467  | -0.1330239 |
| H | 4.5566922  | 0.7065377  | 0.3598971  |
| H | 3.2518752  | 4.0945217  | -0.5521139 |
| H | 1.5308022  | 3.6601287  | -0.5350879 |
| H | 2.4431212  | 3.7477787  | 0.9859951  |
| H | 4.8642782  | -2.1661763 | 2.3271801  |
| H | 6.3942652  | -1.2017813 | -1.5688369 |
| H | 4.2135412  | -1.7619113 | -2.5585439 |
| H | 2.6607052  | -2.7474523 | 1.3154901  |
| H | 1.7949952  | -3.7194213 | -1.2781699 |
| H | 1.9694632  | -2.3498443 | -2.3871919 |
| H | 8.7765482  | -0.6016043 | 1.0640921  |
| H | 7.6804562  | 0.1188177  | -0.1478739 |

|   |            |            |            |
|---|------------|------------|------------|
| H | 8.3338622  | -1.5284813 | -0.3932829 |
| P | -3.1835128 | 1.6365527  | 1.6589231  |
| C | -4.3633768 | 2.5387187  | 0.6084111  |
| H | -5.2561008 | 1.9163247  | 0.4923191  |
| H | -4.6198098 | 3.4847557  | 1.1014431  |
| H | -3.9558548 | 2.7346887  | -0.3870699 |
| C | -1.8386608 | 2.8262387  | 2.0118331  |
| H | -2.2372878 | 3.7723227  | 2.3973151  |
| H | -1.1601328 | 2.3825667  | 2.7485931  |
| H | -1.2721848 | 3.0139147  | 1.0925021  |
| C | -4.0756638 | 1.4727107  | 3.2408521  |
| H | -4.4407248 | 2.4493347  | 3.5810461  |
| H | -4.9211918 | 0.7987487  | 3.0689891  |
| H | -3.4148118 | 1.0406687  | 3.9986351  |
| C | -7.2106308 | -1.7790993 | -0.4691889 |
| F | -8.2184938 | -1.0005223 | -0.0992569 |
| F | -7.1456308 | -2.8179733 | 0.3618521  |
| F | -7.4424648 | -2.2287083 | -1.6947299 |
| S | -5.6256358 | -0.8617793 | -0.4108009 |
| O | -5.8206768 | 0.2335577  | -1.3831429 |
| O | -4.6356108 | -1.8756993 | -0.8063969 |
| O | -5.5430798 | -0.4251763 | 0.9951891  |
| H | 0.1098892  | 2.0992377  | -0.9475289 |
| H | -1.9571538 | 3.1296657  | -1.8325039 |

Zero-point correction= 0.625480 (Hartree/Particle)

Thermal correction to Energy= 0.673367

Thermal correction to Enthalpy= 0.674312

Thermal correction to Gibbs Free Energy= 0.542313

Sum of electronic and zero-point Energies= -2897.955368

Sum of electronic and thermal Energies= -2897.907481

Sum of electronic and thermal Enthalpies= -2897.906537

Sum of electronic and thermal Free Energies= -2898.038536

**C-int1**

|   |            |            |            |
|---|------------|------------|------------|
| C | -0.8046086 | -0.4536774 | 2.1281985  |
| C | 0.2146684  | -0.5118534 | 1.2467655  |
| C | -2.0799896 | 0.0743926  | 1.7291295  |
| C | -2.3057806 | 0.4155366  | 0.3414865  |
| C | -1.3208536 | 0.2320966  | -0.5549665 |
| C | 0.0566804  | -0.1721744 | -0.1949555 |
| C | 0.5997674  | -1.3562994 | -1.0257485 |
| C | 2.0275524  | -1.0472814 | -1.3121505 |
| N | 2.2794884  | 0.2248856  | -0.8195565 |
| C | 1.0546914  | 0.9601206  | -0.6283635 |
| C | -0.0969736 | -2.4713164 | -1.3286535 |
| N | 0.7373744  | 3.3130346  | 0.1413445  |
| C | 1.1730004  | 2.0552116  | 0.4245755  |
| O | 1.6200574  | 1.7899466  | 1.5330385  |
| O | 2.8786784  | -1.7235724 | -1.8616635 |
| O | -2.9826996 | 0.2109026  | 2.6098955  |
| H | 0.6851504  | 1.3703116  | -1.5826935 |

|    |            |            |            |
|----|------------|------------|------------|
| Au | -2.0239066 | -2.8545314 | -0.6316385 |
| C  | 0.5182354  | -3.5743714 | -2.1369085 |
| C  | 0.3490114  | 4.0334027  | -1.0952485 |
| C  | -0.9791306 | 3.5326376  | -1.6576015 |
| C  | 1.4558284  | 3.9671626  | -2.1455245 |
| C  | 0.1706664  | 5.4866836  | -0.6612695 |
| C  | 5.5817664  | -0.2244474 | 1.9961595  |
| C  | 6.6767984  | -0.8653824 | 1.4063455  |
| C  | 6.7573034  | -0.9620674 | 0.0184095  |
| C  | 5.7423864  | -0.4138364 | -0.7636775 |
| C  | 4.6586484  | 0.2367476  | -0.1897835 |
| C  | 4.5853454  | 0.3186176  | 1.2057775  |
| C  | 3.5786004  | 0.8435656  | -1.0447445 |
| O  | 7.6016354  | -1.3627054 | 2.2666665  |
| C  | 8.7100144  | -2.0292264 | 1.7189955  |
| H  | -3.2998476 | 0.7259176  | 0.0375865  |
| H  | -1.5103636 | 0.4042216  | -1.6147625 |
| H  | 0.8552004  | 3.8993157  | 0.9613695  |
| H  | -3.9577966 | 0.7383016  | 2.3010945  |
| H  | 1.5400114  | -3.3646934 | -2.4639005 |
| H  | 0.5176184  | -4.4997104 | -1.5447365 |
| H  | -0.1124126 | -3.7868434 | -3.0102095 |
| H  | -1.7531176 | 3.5144556  | -0.8811445 |
| H  | -1.3129056 | 4.2000436  | -2.4610055 |
| H  | -0.9013866 | 2.5283136  | -2.0871975 |

|   |            |            |            |
|---|------------|------------|------------|
| H | 2.3967594  | 4.3552156  | -1.7374275 |
| H | 1.1813284  | 4.5784727  | -3.0135645 |
| H | 1.6349994  | 2.9483087  | -2.5080065 |
| H | -0.1094176 | 6.1052066  | -1.5201925 |
| H | -0.6214666 | 5.5758586  | 0.0923345  |
| H | 1.1019324  | 5.8899817  | -0.2442375 |
| H | 5.5428824  | -0.1687734 | 3.0813185  |
| H | 7.5888144  | -1.4686983 | -0.4625715 |
| H | 5.7891424  | -0.5150734 | -1.8470425 |
| H | 3.7274294  | 0.8101527  | 1.6651115  |
| H | 3.8484624  | 0.7532047  | -2.1079945 |
| H | 3.4716214  | 1.9141106  | -0.8193905 |
| H | 9.3281514  | -2.3510734 | 2.5599245  |
| H | 9.3045484  | -1.3682954 | 1.0711595  |
| H | 8.4083444  | -2.9131664 | 1.1382295  |
| P | -4.1431896 | -3.5258244 | 0.2688015  |
| C | -4.5106156 | -2.8438784 | 1.9215595  |
| H | -4.6429206 | -1.7618494 | 1.8314945  |
| H | -5.4285036 | -3.2860734 | 2.3268515  |
| H | -3.6733316 | -3.0473234 | 2.5976385  |
| C | -4.1826866 | -5.3365624 | 0.5435725  |
| H | -5.1345586 | -5.6389234 | 0.9968055  |
| H | -4.0552856 | -5.8564964 | -0.4111875 |
| H | -3.3586066 | -5.6246203 | 1.2039765  |
| C | -5.6547656 | -3.2107454 | -0.7019375 |

|   |            |            |            |
|---|------------|------------|------------|
| H | -6.5216756 | -3.6599344 | -0.2024505 |
| H | -5.8055146 | -2.1297933 | -0.7798655 |
| H | -5.5458896 | -3.6416654 | -1.7018425 |
| C | -5.9778826 | 2.3862356  | -0.0856545 |
| F | -6.4012306 | 3.4613726  | 0.5540415  |
| F | -6.7680796 | 2.1492236  | -1.1200125 |
| F | -4.7422306 | 2.6126136  | -0.5357615 |
| S | -5.9837906 | 0.9300936  | 1.0315955  |
| O | -5.0001996 | 1.3888886  | 2.0900045  |
| O | -5.4165896 | -0.1530174 | 0.2192185  |
| O | -7.3461836 | 0.8102547  | 1.5063035  |
| H | 1.2050024  | -0.8363404 | 1.5589525  |
| H | -0.6892076 | -0.7329044 | 3.1715135  |

Zero-point correction= 0.623473 (Hartree/Particle)

Thermal correction to Energy= 0.670876

Thermal correction to Enthalpy= 0.671820

Thermal correction to Gibbs Free Energy= 0.537961

Sum of electronic and zero-point Energies= -2897.954444

Sum of electronic and thermal Energies= -2897.907040

Sum of electronic and thermal Enthalpies= -2897.906096

Sum of electronic and thermal Free Energies= -2898.039955

### **C-ts2**

|   |            |            |           |
|---|------------|------------|-----------|
| C | -0.8606655 | -0.4921726 | 2.1831621 |
| C | 0.3220165  | -0.6231596 | 1.5737191 |
| C | -1.9948125 | 0.0653014  | 1.4557541 |

|    |            |            |            |
|----|------------|------------|------------|
| C  | -1.8275225 | 0.6796184  | 0.2314551  |
| C  | -0.5222915 | 0.8104994  | -0.3026489 |
| C  | 0.5753935  | -0.1074496 | 0.1971851  |
| C  | 0.7888475  | -1.2000826 | -0.8716949 |
| C  | 1.9509625  | -0.7629886 | -1.6828669 |
| N  | 2.4111315  | 0.4590264  | -1.1662129 |
| C  | 1.9048735  | 0.6649174  | 0.1723621  |
| C  | -0.0224575 | -2.2578796 | -1.1078809 |
| N  | 0.2403235  | 2.4683714  | 0.2829991  |
| C  | 1.6601295  | 2.1407504  | 0.3902181  |
| O  | 2.5225835  | 2.9599764  | 0.5600681  |
| O  | 2.4679315  | -1.2813066 | -2.6564939 |
| O  | -3.1492465 | -0.1150056 | 2.0424831  |
| Au | -1.9042325 | -2.6424206 | -0.2624829 |
| C  | 0.2991365  | -3.2455146 | -2.1923089 |
| C  | 6.3708045  | 0.4920694  | 1.1929311  |
| C  | 6.8160295  | -0.8095606 | 0.9454051  |
| C  | 6.2669355  | -1.5409106 | -0.1098079 |
| C  | 5.2832025  | -0.9631706 | -0.9064459 |
| C  | 4.8344575  | 0.3365454  | -0.6735629 |
| C  | 5.3910715  | 1.0538994  | 0.3910361  |
| C  | 3.7491675  | 0.9287594  | -1.5309909 |
| O  | 7.7783755  | -1.2714616 | 1.7798371  |
| C  | 8.2683115  | -2.5716216 | 1.5620651  |
| H  | -2.6956235 | 1.0351434  | -0.3138039 |

|   |            |            |            |
|---|------------|------------|------------|
| H | -3.8932845 | 0.0683194  | 1.3850391  |
| H | 1.2518175  | -3.0712636 | -2.6971369 |
| H | 0.2844165  | -4.2592566 | -1.7712729 |
| H | -0.5058345 | -3.2336786 | -2.9403599 |
| H | 6.8155515  | 1.0395684  | 2.0200951  |
| H | 6.6000715  | -2.5524146 | -0.3228769 |
| H | 4.8518455  | -1.5303396 | -1.7301949 |
| H | 5.0431005  | 2.0674374  | 0.5896461  |
| H | 3.8751355  | 0.6392654  | -2.5795949 |
| H | 3.7654235  | 2.0241494  | -1.4746129 |
| H | 9.0282765  | -2.7495286 | 2.3255591  |
| H | 8.7289865  | -2.6715966 | 0.5688351  |
| H | 7.4763375  | -3.3277056 | 1.6630141  |
| P | -4.1422475 | -3.3027966 | 0.3181571  |
| C | -5.0000715 | -2.7147726 | 1.8215091  |
| H | -5.3329025 | -1.6834346 | 1.6690631  |
| H | -5.8764815 | -3.3476876 | 2.0058941  |
| H | -4.3314245 | -2.7500956 | 2.6861571  |
| C | -4.1878115 | -5.1265546 | 0.5067731  |
| H | -5.2152945 | -5.4753836 | 0.6666051  |
| H | -3.7826905 | -5.5954176 | -0.3958439 |
| H | -3.5676045 | -5.4268296 | 1.3572741  |
| C | -5.3492285 | -2.9929486 | -1.0152949 |
| H | -6.3169765 | -3.4410386 | -0.7592959 |
| H | -5.4692595 | -1.9116276 | -1.1397509 |



|   |            |            |            |
|---|------------|------------|------------|
| H | -4.9814845 | -3.4268916 | -1.9505209 |
| C | -5.3334355 | 2.5288444  | -0.0100789 |
| F | -4.4837295 | 2.7397604  | 1.0059291  |
| F | -6.2754595 | 3.4546094  | 0.0293871  |
| F | -4.6413675 | 2.6702824  | -1.1434109 |
| S | -6.0379195 | 0.8365504  | 0.1162581  |
| O | -4.7693345 | 0.0302774  | 0.0625891  |
| O | -6.8682635 | 0.6806074  | -1.0683099 |
| O | -6.6647715 | 0.8073904  | 1.4338511  |
| H | 2.6248725  | 0.3132054  | 0.9337551  |
| H | -0.4454435 | 1.0308354  | -1.3684999 |
| H | -0.1691705 | 2.4628974  | 1.2233451  |
| C | -0.1304955 | 3.7724004  | -0.4034189 |
| C | 0.6399205  | 3.8704644  | -1.7126239 |
| C | -1.6284675 | 3.7386554  | -0.6767999 |
| C | 0.1944245  | 4.9371274  | 0.5258321  |
| H | 1.7118015  | 4.0228134  | -1.5538569 |
| H | 0.4982355  | 2.9773204  | -2.3338499 |
| H | 0.2606575  | 4.7279334  | -2.2787189 |
| H | -2.2183895 | 3.5423494  | 0.2264261  |
| H | -1.9330275 | 4.7171054  | -1.0652129 |
| H | -1.9004355 | 2.9905894  | -1.4284249 |
| H | -0.0832035 | 5.8765724  | 0.0336901  |
| H | -0.3886545 | 4.8696394  | 1.4537761  |
| H | 1.2576995  | 4.9744494  | 0.7746101  |

|   |            |            |           |
|---|------------|------------|-----------|
| H | 1.1488005  | -1.1410996 | 2.0580071 |
| H | -1.0580445 | -0.8892296 | 3.1754031 |

Zero-point correction= 0.626281 (Hartree/Particle)

Thermal correction to Energy= 0.672437

Thermal correction to Enthalpy= 0.673381

Thermal correction to Gibbs Free Energy= 0.544054

Sum of electronic and zero-point Energies= -2897.922080

Sum of electronic and thermal Energies= -2897.875925

Sum of electronic and thermal Enthalpies= -2897.874981

Sum of electronic and thermal Free Energies= -2898.004308

### **C-int2**

|   |            |            |            |
|---|------------|------------|------------|
| C | 0.0214774  | -0.4005731 | 2.4018504  |
| C | 0.9193004  | -0.6985520 | 1.4626314  |
| C | -1.2183366 | 0.3003809  | 2.0691824  |
| C | -1.4897926 | 0.6824590  | 0.7981384  |
| C | -0.5703036 | 0.3797349  | -0.3199896 |
| C | 0.7781814  | -0.3155871 | 0.0147454  |
| C | 1.0743514  | -1.5127091 | -0.8937656 |
| C | 2.3625104  | -1.2603511 | -1.5774616 |
| N | 2.7132994  | 0.0755249  | -1.3378136 |
| C | 1.9011914  | 0.6892669  | -0.3195396 |
| C | 0.2681094  | -2.5894361 | -1.0358676 |
| N | -0.2187616 | 1.7234159  | -1.0355396 |
| C | 1.2718194  | 1.9429250  | -0.8555056 |
| O | 1.7791814  | 2.9908179  | -1.1086946 |

|    |            |            |            |
|----|------------|------------|------------|
| O  | 3.0574654  | -1.9929741 | -2.2584446 |
| O  | -2.0197746 | 0.4906509  | 3.1100854  |
| Au | -1.6229156 | -2.7104411 | -0.1479026 |
| C  | 0.6347864  | -3.7429361 | -1.9190336 |
| C  | 5.9575384  | 1.8455259  | 1.4390524  |
| C  | 6.3410124  | 0.6478650  | 2.0489374  |
| C  | 5.9928024  | -0.5719021 | 1.4621774  |
| C  | 5.2716494  | -0.5788461 | 0.2726354  |
| C  | 4.8917634  | 0.6096389  | -0.3499566 |
| C  | 5.2377154  | 1.8207189  | 0.2555434  |
| C  | 4.0600624  | 0.5698729  | -1.6011806 |
| O  | 7.0403634  | 0.7713339  | 3.2007274  |
| C  | 7.4540204  | -0.4059271 | 3.8511614  |
| H  | -2.4557546 | 1.1280949  | 0.5635884  |
| H  | -2.8993766 | 0.8373259  | 2.8024634  |
| H  | 1.5928694  | -3.6272011 | -2.4327426 |
| H  | 0.6653224  | -4.6594511 | -1.3142676 |
| H  | -0.1610236 | -3.9133201 | -2.6564386 |
| H  | 6.2360354  | 2.7799559  | 1.9192884  |
| H  | 6.2830324  | -1.5144031 | 1.9169954  |
| H  | 5.0059934  | -1.5293921 | -0.1907096 |
| H  | 4.9330654  | 2.7578420  | -0.2111266 |
| H  | 4.4745344  | -0.1220041 | -2.3437766 |
| H  | 4.0008194  | 1.5667599  | -2.0592146 |
| H  | 7.9959234  | -0.0922981 | 4.7454014  |

|   |            |            |            |
|---|------------|------------|------------|
| H | 8.1239574  | -1.0055371 | 3.2186174  |
| H | 6.5978174  | -1.0267961 | 4.1513854  |
| P | -3.8727446 | -2.6777521 | 0.6819414  |
| C | -4.0877696 | -2.2818900 | 2.4484594  |
| H | -3.5113326 | -1.3888461 | 2.7038094  |
| H | -5.1450496 | -2.0803410 | 2.6586754  |
| H | -3.7377186 | -3.1250650 | 3.0528204  |
| C | -4.8493116 | -4.2106850 | 0.4654484  |
| H | -5.8789566 | -4.0535881 | 0.8082274  |
| H | -4.8604676 | -4.4932900 | -0.5918676 |
| H | -4.3980666 | -5.0267351 | 1.0381914  |
| C | -4.8273816 | -1.4201901 | -0.2255076 |
| H | -5.8214196 | -1.2648791 | 0.2121594  |
| H | -4.2940066 | -0.4692411 | -0.1508116 |
| H | -4.9086416 | -1.7207351 | -1.2758886 |
| C | -5.1572006 | 2.5753599  | 0.1501564  |
| F | -3.9866806 | 3.2293919  | 0.2486174  |
| F | -6.0982916 | 3.4549129  | -0.1450296 |
| F | -5.0374176 | 1.7273249  | -0.8810276 |
| S | -5.5359006 | 1.6755779  | 1.7106144  |
| O | -4.2850536 | 0.8732169  | 1.8671824  |
| O | -6.6957926 | 0.8595859  | 1.3598894  |
| O | -5.6999746 | 2.7411509  | 2.6884964  |
| H | 2.5098124  | 0.9765909  | 0.5562684  |
| H | -1.0689436 | -0.2136731 | -1.0927376 |

|   |            |            |            |
|---|------------|------------|------------|
| H | -0.6794266 | 2.4648829  | -0.4889676 |
| C | -0.7526396 | 1.8807699  | -2.4941076 |
| C | -0.0411036 | 0.8705449  | -3.3737386 |
| C | -2.2563906 | 1.6522409  | -2.4343376 |
| C | -0.4803616 | 3.3066740  | -2.9513076 |
| H | 1.0429624  | 1.0411950  | -3.3970486 |
| H | -0.2210426 | -0.1644071 | -3.0591816 |
| H | -0.4170046 | 0.9796239  | -4.3966686 |
| H | -2.7476066 | 2.3484769  | -1.7440926 |
| H | -2.6676106 | 1.8340409  | -3.4332286 |
| H | -2.5362136 | 0.6315789  | -2.1506636 |
| H | -0.9608726 | 3.4432269  | -3.9261356 |
| H | -0.9169586 | 4.0417349  | -2.2638736 |
| H | 0.5838144  | 3.5238619  | -3.0621726 |
| H | 1.8522134  | -1.2083441 | 1.7071754  |
| H | 0.1646194  | -0.6717770 | 3.4446224  |

Zero-point correction= 0.627826 (Hartree/Particle)

Thermal correction to Energy= 0.674351

Thermal correction to Enthalpy= 0.675295

Thermal correction to Gibbs Free Energy= 0.545265

Sum of electronic and zero-point Energies= -2897.927325

Sum of electronic and thermal Energies= -2897.880800

Sum of electronic and thermal Enthalpies= -2897.879856

Sum of electronic and thermal Free Energies= -2898.009886

**C-ts3**

|    |            |            |            |
|----|------------|------------|------------|
| C  | -0.2767177 | -0.5041186 | 2.4344835  |
| C  | 0.6812683  | -0.8248246 | 1.5572135  |
| C  | -1.4659487 | 0.2080334  | 2.0084835  |
| C  | -1.6018257 | 0.6732484  | 0.7016525  |
| C  | -0.5441587 | 0.3753864  | -0.3382855 |
| C  | 0.7185973  | -0.3968676 | 0.1237205  |
| C  | 1.0679383  | -1.5519546 | -0.8084705 |
| C  | 2.3188033  | -1.1982746 | -1.5207485 |
| N  | 2.6268193  | 0.1247684  | -1.1918975 |
| C  | 1.8959093  | 0.5921044  | -0.0387445 |
| C  | 0.2852633  | -2.6372176 | -1.0003195 |
| N  | -0.1114867 | 1.8190864  | -0.6095295 |
| C  | 1.3089253  | 1.9496564  | -0.3439415 |
| O  | 1.9149223  | 2.9863234  | -0.3929985 |
| O  | 2.9975093  | -1.8519576 | -2.2933145 |
| O  | -2.3599697 | 0.3802504  | 2.9376355  |
| Au | -1.6466997 | -2.7857366 | -0.2164535 |
| C  | 0.6860663  | -3.7479176 | -1.9222905 |
| C  | 6.0927033  | 1.5520584  | 1.4727415  |
| C  | 6.7030203  | 0.3215544  | 1.7319395  |
| C  | 6.4149893  | -0.7801476 | 0.9229525  |
| C  | 5.5242263  | -0.6377896 | -0.1368205 |
| C  | 4.9160663  | 0.5861974  | -0.4101545 |
| C  | 5.2087433  | 1.6775384  | 0.4136205  |
| C  | 3.9226373  | 0.7032934  | -1.5325045 |

|   |            |            |            |
|---|------------|------------|------------|
| O | 7.5530363  | 0.2970654  | 2.7864865  |
| C | 8.1984653  | -0.9165026 | 3.0838755  |
| H | -2.6149557 | 0.8849794  | 0.3572215  |
| H | -3.2461007 | 0.6767584  | 2.5426035  |
| H | 1.6592503  | -3.5990006 | -2.3978325 |
| H | 0.6994443  | -4.6927886 | -1.3625365 |
| H | -0.0805927 | -3.8827186 | -2.6972785 |
| H | 6.3326973  | 2.3920174  | 2.1196145  |
| H | 6.8799833  | -1.7447796 | 1.1040215  |
| H | 5.2961593  | -1.4939976 | -0.7715525 |
| H | 4.7275323  | 2.6361474  | 0.2188605  |
| H | 4.2558113  | 0.1527904  | -2.4193815 |
| H | 3.7788303  | 1.7552584  | -1.8125095 |
| H | 8.8314123  | -0.7271806 | 3.9531375  |
| H | 8.8286873  | -1.2572736 | 2.2499315  |
| H | 7.4790333  | -1.7103216 | 3.3317455  |
| P | -3.9716727 | -2.8417496 | 0.3790215  |
| C | -4.4252357 | -2.5257426 | 2.1172315  |
| H | -3.9395877 | -1.6136566 | 2.4700785  |
| H | -5.5101207 | -2.3897396 | 2.2012005  |
| H | -4.1033127 | -3.3730316 | 2.7313645  |
| C | -4.8132757 | -4.4257026 | 0.0123545  |
| H | -5.8851977 | -4.3432386 | 0.2283405  |
| H | -4.6762567 | -4.6784886 | -1.0437125 |
| H | -4.3824147 | -5.2276266 | 0.6197295  |

|   |            |            |            |
|---|------------|------------|------------|
| C | -4.9005727 | -1.6316936 | -0.6191885 |
| H | -5.9377867 | -1.5399646 | -0.2749995 |
| H | -4.4370407 | -0.6473706 | -0.5132795 |
| H | -4.8661157 | -1.9439396 | -1.6685815 |
| C | -5.4853197 | 2.4182834  | 0.1038385  |
| F | -4.4532497 | 3.2226374  | 0.3845065  |
| F | -6.5394307 | 3.1644784  | -0.1731155 |
| F | -5.1591487 | 1.7185354  | -0.9896385 |
| S | -5.8093607 | 1.2933424  | 1.5171575  |
| O | -4.4740737 | 0.6073554  | 1.5946755  |
| O | -6.8631357 | 0.4048584  | 1.0384915  |
| O | -6.0871627 | 2.1815344  | 2.6344695  |
| H | 2.5512253  | 0.6701104  | 0.8453685  |
| H | -0.9353657 | -0.0793766 | -1.2529845 |
| H | -0.8777307 | 1.9444854  | 0.4099965  |
| C | -0.6549187 | 2.5196524  | -1.8615135 |
| C | 0.1133043  | 1.9766204  | -3.0583655 |
| C | -2.1456397 | 2.2327624  | -1.9941395 |
| C | -0.4702887 | 4.0241804  | -1.7074045 |
| H | 1.1825423  | 2.2103084  | -2.9936545 |
| H | 0.0022493  | 0.8894004  | -3.1572175 |
| H | -0.2742527 | 2.4367384  | -3.9742805 |
| H | -2.7234447 | 2.6596614  | -1.1676635 |
| H | -2.4953657 | 2.7129394  | -2.9146165 |
| H | -2.3866527 | 1.1671354  | -2.0812715 |



|   |            |            |            |
|---|------------|------------|------------|
| H | -0.9646397 | 4.5178294  | -2.5517995 |
| H | -0.9460757 | 4.3806074  | -0.7861535 |
| H | 0.5788543  | 4.3212214  | -1.6944975 |
| H | 1.5481573  | -1.4011196 | 1.8811545  |
| H | -0.2387817 | -0.8153826 | 3.4747205  |

Zero-point correction= 0.622781 (Hartree/Particle)

Thermal correction to Energy= 0.668804

Thermal correction to Enthalpy= 0.669748

Thermal correction to Gibbs Free Energy= 0.540604

Sum of electronic and zero-point Energies= -2897.903598

Sum of electronic and thermal Energies= -2897.857575

Sum of electronic and thermal Enthalpies= -2897.856631

Sum of electronic and thermal Free Energies= -2897.985775

### **C-int3**

|   |            |            |            |
|---|------------|------------|------------|
| C | 0.2412650  | -0.0739731 | 2.3439824  |
| C | 1.1281350  | -0.4224011 | 1.3947514  |
| C | -0.9393730 | 0.6778559  | 1.9673714  |
| C | -0.8461920 | 1.4368059  | 0.6731694  |
| C | -0.3465940 | 0.5366159  | -0.4583486 |
| C | 0.9266660  | -0.2260751 | -0.0688326 |
| C | 1.0691700  | -1.6111531 | -0.7212636 |
| C | 2.4648320  | -1.6863421 | -1.2556316 |
| N | 2.9901090  | -0.4140681 | -1.1895256 |
| C | 2.0561880  | 0.5734119  | -0.7261076 |
| C | 0.1367300  | -2.5840091 | -0.7252206 |

|    |            |            |            |
|----|------------|------------|------------|
| N  | 0.0078280  | 1.2861419  | -1.6598296 |
| C  | 1.3617610  | 1.2793379  | -1.8942676 |
| O  | 1.9507670  | 1.7022579  | -2.8710386 |
| O  | 3.0915500  | -2.6529661 | -1.6604336 |
| O  | -1.9396510 | 0.7283479  | 2.6989184  |
| Au | -1.7805010 | -2.4418281 | 0.1043254  |
| C  | 0.3857240  | -3.9076791 | -1.3895696 |
| C  | 6.3654730  | 1.9654729  | 0.9469404  |
| C  | 6.5895670  | 1.0258249  | 1.9554114  |
| C  | 6.0914150  | -0.2721231 | 1.8164524  |
| C  | 5.3799180  | -0.6117621 | 0.6702814  |
| C  | 5.1559070  | 0.3139049  | -0.3475486 |
| C  | 5.6537110  | 1.6084539  | -0.1881696 |
| C  | 4.3513220  | -0.0812001 | -1.5568676 |
| O  | 7.2953400  | 1.4658099  | 3.0272854  |
| C  | 7.5609320  | 0.5492189  | 4.0586944  |
| H  | -1.8043420 | 1.9045509  | 0.4289914  |
| H  | -3.1512040 | 1.0499779  | 1.9677934  |
| H  | 1.3845510  | -3.9935501 | -1.8257386 |
| H  | 0.2446890  | -4.7193211 | -0.6629276 |
| H  | -0.3695690 | -4.0770571 | -2.1692816 |
| H  | 6.7601740  | 2.9693689  | 1.0817794  |
| H  | 6.2573420  | -1.0210911 | 2.5854324  |
| H  | 4.9957570  | -1.6262151 | 0.5547174  |
| H  | 5.4799050  | 2.3466189  | -0.9709656 |

|   |            |            |            |
|---|------------|------------|------------|
| H | 4.7563220  | -0.9829731 | -2.0324326 |
| H | 4.3346480  | 0.7243139  | -2.3025516 |
| H | 8.1398740  | 1.0869619  | 4.8124304  |
| H | 8.1492510  | -0.3081881 | 3.7008064  |
| H | 6.6356110  | 0.1742979  | 4.5203064  |
| P | -4.0554550 | -2.4882771 | 0.8859784  |
| C | -4.4221030 | -1.9432811 | 2.5931694  |
| H | -3.9408580 | -0.9860601 | 2.8050024  |
| H | -5.5044680 | -1.8446161 | 2.7381064  |
| H | -4.0255590 | -2.6901091 | 3.2888234  |
| C | -4.7315110 | -4.1914431 | 0.8649554  |
| H | -5.7810080 | -4.1949361 | 1.1832154  |
| H | -4.6598450 | -4.5996391 | -0.1482406 |
| H | -4.1479090 | -4.8304231 | 1.5350294  |
| C | -5.2271590 | -1.5968331 | -0.1970926 |
| H | -6.2463990 | -1.6554201 | 0.2022744  |
| H | -4.9424500 | -0.5453441 | -0.2775096 |
| H | -5.1920590 | -2.0537891 | -1.1918866 |
| C | -5.1854300 | 2.9432209  | 0.1812434  |
| F | -4.0389980 | 3.6080729  | 0.1284404  |
| F | -6.1875310 | 3.7958079  | 0.2586124  |
| F | -5.3123840 | 2.2014039  | -0.9083396 |
| S | -5.1944550 | 1.8623739  | 1.6659434  |
| O | -3.9426730 | 0.9946709  | 1.2861004  |
| O | -6.3887240 | 1.0523009  | 1.5725274  |

|   |            |            |            |
|---|------------|------------|------------|
| O | -4.9138980 | 2.6973279  | 2.8123554  |
| H | 2.5475040  | 1.3017289  | -0.0597656 |
| H | -1.1334180 | -0.1931021 | -0.6935086 |
| C | -0.9889880 | 1.5096419  | -2.7502656 |
| C | -0.9372660 | 0.3007649  | -3.6819096 |
| C | -2.3926680 | 1.6573939  | -2.1673226 |
| C | -0.6662810 | 2.7994499  | -3.5010716 |
| H | 0.0630800  | 0.1925919  | -4.1149756 |
| H | -1.1817100 | -0.6220291 | -3.1379336 |
| H | -1.6573500 | 0.4173559  | -4.5011426 |
| H | -2.4772840 | 2.5583229  | -1.5482926 |
| H | -3.0993680 | 1.7678329  | -2.9978066 |
| H | -2.7225840 | 0.7903999  | -1.5791536 |
| H | -1.4572220 | 2.9902549  | -4.2366386 |
| H | -0.6366240 | 3.6465509  | -2.8049556 |
| H | 0.2941550  | 2.7412049  | -4.0142346 |
| H | -0.1144360 | 2.2449489  | 0.8291774  |
| H | 2.0379390  | -0.9644291 | 1.6621774  |
| H | 0.3483870  | -0.3654661 | 3.3856234  |

Zero-point correction= 0.627461 (Hartree/Particle)

Thermal correction to Energy= 0.673543

Thermal correction to Enthalpy= 0.674487

Thermal correction to Gibbs Free Energy= 0.546161

Sum of electronic and zero-point Energies= -2897.977040

Sum of electronic and thermal Energies= -2897.930958

Sum of electronic and thermal Enthalpies= -2897.930014

Sum of electronic and thermal Free Energies= -2898.058340

**C-int4**

|    |            |            |            |
|----|------------|------------|------------|
| C  | 0.6757400  | 0.4421622  | 2.1435752  |
| C  | -0.0021750 | 0.7849442  | 1.0369322  |
| C  | 0.9730410  | -0.9677128 | 2.4311702  |
| C  | 0.1262730  | -1.9587498 | 1.6705582  |
| C  | 0.0594620  | -1.6157778 | 0.1811292  |
| C  | -0.3639070 | -0.1554338 | -0.0678858 |
| C  | 0.1769920  | 0.4044912  | -1.3929888 |
| C  | -0.9967070 | 0.8643152  | -2.1987698 |
| N  | -2.1301850 | 0.5611742  | -1.4768968 |
| C  | -1.8806610 | -0.2538628 | -0.3132258 |
| C  | 1.4816870  | 0.4914472  | -1.7281798 |
| N  | -0.9419250 | -2.3961048 | -0.5365348 |
| C  | -2.1302220 | -1.7278098 | -0.6355548 |
| O  | -3.2116290 | -2.1796948 | -0.9768218 |
| O  | -1.0129460 | 1.4355762  | -3.2767608 |
| O  | 1.8064450  | -1.3202298 | 3.2533872  |
| Au | 2.9933220  | -0.0953218 | -0.3850918 |
| C  | 1.9329990  | 0.9983292  | -3.0686098 |
| C  | -6.1089500 | 1.2744892  | 0.6993692  |
| C  | -5.9549020 | 2.6306962  | 0.9984242  |
| C  | -4.9934180 | 3.3855622  | 0.3232722  |
| C  | -4.2041450 | 2.7744612  | -0.6466968 |

|   |            |            |            |
|---|------------|------------|------------|
| C | -4.3561220 | 1.4272252  | -0.9634058 |
| C | -5.3144060 | 0.6828962  | -0.2693448 |
| C | -3.4724180 | 0.7808352  | -1.9917538 |
| O | -6.7798770 | 3.1209642  | 1.9577142  |
| C | -6.6670370 | 4.4824702  | 2.2860222  |
| H | 0.5234930  | -2.9654078 | 1.8444312  |
| H | 2.0458330  | 2.2047052  | -0.5216718 |
| H | 1.1044420  | 1.2384282  | -3.7394098 |
| H | 2.5562190  | 1.8955352  | -2.9502298 |
| H | 2.5858390  | 0.2520022  | -3.5403638 |
| H | -6.8605450 | 0.7094532  | 1.2450072  |
| H | -4.8559880 | 4.4410272  | 0.5396132  |
| H | -3.4520840 | 3.3610112  | -1.1751968 |
| H | -5.4210100 | -0.3784558 | -0.4923878 |
| H | -3.3408710 | 1.4155242  | -2.8762428 |
| H | -3.9008390 | -0.1774688 | -2.3152958 |
| H | -7.4095820 | 4.6786412  | 3.0623702  |
| H | -6.8751110 | 5.1292612  | 1.4212592  |
| H | -5.6686600 | 4.7269862  | 2.6774102  |
| P | 4.6789960  | -0.7313228 | 1.1926492  |
| C | 4.6541210  | 0.1123682  | 2.8077552  |
| H | 3.7037890  | -0.1133588 | 3.3044012  |
| H | 5.4863770  | -0.2470438 | 3.4253272  |
| H | 4.7367670  | 1.1914282  | 2.6549882  |
| C | 6.3769450  | -0.4455348 | 0.5772212  |

|   |            |            |            |
|---|------------|------------|------------|
| H | 7.1236170  | -0.7485058 | 1.3208702  |
| H | 6.5375730  | -1.0022798 | -0.3512078 |
| H | 6.4907480  | 0.6231102  | 0.3638962  |
| C | 4.6222410  | -2.5040838 | 1.6353362  |
| H | 5.4470530  | -2.7688888 | 2.3076252  |
| H | 3.6696630  | -2.6914038 | 2.1456432  |
| H | 4.6733600  | -3.1193538 | 0.7313992  |
| C | 4.5644240  | 3.6603702  | -1.2230258 |
| F | 4.7268270  | 2.4035272  | -1.6164008 |
| F | 5.7273210  | 4.1524802  | -0.8387448 |
| F | 4.0752620  | 4.3730002  | -2.2150488 |
| S | 3.4181100  | 3.7121642  | 0.2183812  |
| O | 2.0827410  | 3.1957652  | -0.4608328 |
| O | 3.2277420  | 5.0976892  | 0.5541572  |
| O | 3.9266470  | 2.7383012  | 1.1639572  |
| H | -2.5063580 | 0.0655042  | 0.5343142  |
| H | 1.0503350  | -1.7768298 | -0.2580428 |
| C | -0.7738510 | -3.8240378 | -0.9149668 |
| C | -1.3051240 | -4.0257458 | -2.3338658 |
| C | 0.7104790  | -4.1801558 | -0.9152818 |
| C | -1.5360480 | -4.7093638 | 0.0688382  |
| H | -2.3751770 | -3.8168028 | -2.3927188 |
| H | -0.7790660 | -3.3653908 | -3.0337978 |
| H | -1.1309420 | -5.0635038 | -2.6423768 |
| H | 1.1773110  | -4.0892648 | 0.0734472  |

|   |            |            |            |
|---|------------|------------|------------|
| H | 0.8166920  | -5.2243268 | -1.2300138 |
| H | 1.2703550  | -3.5574918 | -1.6254788 |
| H | -1.4466430 | -5.7625548 | -0.2250088 |
| H | -1.1400700 | -4.6082328 | 1.0868472  |
| H | -2.5972830 | -4.4414278 | 0.0757102  |
| H | -0.8916010 | -1.9257868 | 2.0923312  |
| H | -0.2579010 | 1.8307452  | 0.8511232  |
| H | 1.0291040  | 1.1836512  | 2.8582672  |

Zero-point correction= 0.627575 (Hartree/Particle)

Thermal correction to Energy= 0.674124

Thermal correction to Enthalpy= 0.675068

Thermal correction to Gibbs Free Energy= 0.544111

Sum of electronic and zero-point Energies= -2897.975523

Sum of electronic and thermal Energies= -2897.928973

Sum of electronic and thermal Enthalpies= -2897.928029

Sum of electronic and thermal Free Energies= -2898.058986

#### **C-ts4**

|   |            |            |            |
|---|------------|------------|------------|
| C | -0.7938769 | -0.8481811 | 2.0899480  |
| C | 0.0736771  | -0.9957421 | 1.0798620  |
| C | -1.3830819 | 0.4666039  | 2.3732800  |
| C | -0.5660169 | 1.6267939  | 1.8568030  |
| C | -0.2242119 | 1.4538339  | 0.3758030  |
| C | 0.3983461  | 0.0632109  | 0.0686420  |
| C | 0.0021401  | -0.4549041 | -1.3146010 |
| C | 1.2232341  | -0.4631061 | -2.1799120 |



|    |            |            |            |
|----|------------|------------|------------|
| N  | 2.2812261  | -0.1221931 | -1.3775800 |
| C  | 1.9073671  | 0.3568379  | -0.0643230 |
| C  | -1.1969919 | -0.9792971 | -1.6654690 |
| N  | 0.7746391  | 2.4102309  | -0.0879140 |
| C  | 2.0337711  | 1.8787189  | -0.0668010 |
| O  | 3.0955741  | 2.4751639  | -0.1351570 |
| O  | 1.3021541  | -0.7749471 | -3.3552430 |
| O  | -2.4177769 | 0.6254969  | 3.0030540  |
| Au | -2.9564379 | -0.1639041 | -0.5906310 |
| C  | -1.4987849 | -1.4571311 | -3.0622800 |
| C  | 6.1646491  | -1.1324151 | 0.8189910  |
| C  | 6.1164301  | -2.5262811 | 0.7262620  |
| C  | 5.2738331  | -3.1316101 | -0.2089140 |
| C  | 4.4948371  | -2.3342051 | -1.0416840 |
| C  | 4.5420251  | -0.9448161 | -0.9660280 |
| C  | 5.3820631  | -0.3538211 | -0.0179670 |
| C  | 3.6601121  | -0.1053571 | -1.8453830 |
| O  | 6.9180401  | -3.2022131 | 1.5851660  |
| C  | 6.8994891  | -4.6072321 | 1.5334560  |
| H  | -1.1141539 | 2.5578539  | 2.0402710  |
| H  | -1.6341829 | -1.9273321 | -0.8448210 |
| H  | -0.6929829 | -2.0790471 | -3.4656970 |
| H  | -2.4331669 | -2.0283091 | -3.0706520 |
| H  | -1.6043109 | -0.6085751 | -3.7494340 |
| H  | 6.8248401  | -0.6889231 | 1.5600380  |

|   |            |            |            |
|---|------------|------------|------------|
| H | 5.2190841  | -4.2125701 | -0.2976270 |
| H | 3.8336361  | -2.8037041 | -1.7709440 |
| H | 5.4042521  | 0.7328079  | 0.0643290  |
| H | 3.6200191  | -0.4873341 | -2.8723220 |
| H | 4.0215751  | 0.9306759  | -1.8745590 |
| H | 7.6009761  | -4.9559411 | 2.2940900  |
| H | 7.2213731  | -4.9829491 | 0.5514690  |
| H | 5.9010051  | -5.0100971 | 1.7567710  |
| P | -4.8543689 | 0.6629979  | 0.5129420  |
| C | -5.3472189 | -0.4069841 | 1.8972030  |
| H | -4.5218529 | -0.4348581 | 2.6176540  |
| H | -6.2577439 | -0.0160611 | 2.3673270  |
| H | -5.5047509 | -1.4267811 | 1.5325580  |
| C | -6.3344449 | 0.7754389  | -0.5496570 |
| H | -7.2019409 | 1.1128199  | 0.0298530  |
| H | -6.1525659 | 1.4718699  | -1.3738080 |
| H | -6.5420569 | -0.2140391 | -0.9703780 |
| C | -4.6621849 | 2.3194999  | 1.2515820  |
| H | -5.5952339 | 2.6355259  | 1.7333160  |
| H | -3.8677569 | 2.2573169  | 2.0056480  |
| H | -4.3851049 | 3.0454519  | 0.4802990  |
| C | -4.3138189 | -3.8498651 | -0.6302570 |
| F | -4.5475309 | -2.7327931 | -1.3337200 |
| F | -5.3886909 | -4.1007061 | 0.1052650  |
| F | -4.1166149 | -4.8428661 | -1.4763090 |

|   |            |            |            |
|---|------------|------------|------------|
| S | -2.8604719 | -3.6188841 | 0.4712820  |
| O | -1.7817119 | -3.2140211 | -0.5171790 |
| O | -2.6203699 | -4.9190041 | 1.0630760  |
| O | -3.2672459 | -2.5088951 | 1.3361430  |
| H | 2.5377691  | -0.0937031 | 0.7155210  |
| H | -1.1478639 | 1.5653179  | -0.2062580 |
| C | 0.5119141  | 3.8627829  | -0.2816180 |
| C | 1.2354561  | 4.3271839  | -1.5454800 |
| C | -0.9834579 | 4.0892879  | -0.4875380 |
| C | 1.0087471  | 4.6463569  | 0.9318240  |
| H | 2.3178391  | 4.2229079  | -1.4471950 |
| H | 0.9024391  | 3.7435719  | -2.4121630 |
| H | 1.0002341  | 5.3819249  | -1.7305840 |
| H | -1.5837339 | 3.8229529  | 0.3908640  |
| H | -1.1483759 | 5.1550229  | -0.6810160 |
| H | -1.3595569 | 3.5306179  | -1.3545670 |
| H | 0.8591861  | 5.7210329  | 0.7705180  |
| H | 0.4659801  | 4.3643239  | 1.8422180  |
| H | 2.0770201  | 4.4662569  | 1.0880330  |
| H | 0.3701201  | 1.6684599  | 2.4358710  |
| H | 0.5072231  | -1.9754671 | 0.8720500  |
| H | -1.1216519 | -1.6900841 | 2.6943870  |

Zero-point correction= 0.622034 (Hartree/Particle)

Thermal correction to Energy= 0.668081

Thermal correction to Enthalpy= 0.669025

Thermal correction to Gibbs Free Energy= 0.540498

Sum of electronic and zero-point Energies= -2897.961778

Sum of electronic and thermal Energies= -2897.915731

Sum of electronic and thermal Enthalpies= -2897.914787

Sum of electronic and thermal Free Energies= -2898.043315

**C-2**

|    |            |            |            |
|----|------------|------------|------------|
| C  | -0.8463455 | 0.1549024  | -1.5691296 |
| C  | -0.1289445 | 0.6184424  | -0.5312736 |
| C  | -0.5911085 | -1.1813566 | -2.1103376 |
| C  | 0.7619095  | -1.7585786 | -1.7682576 |
| C  | 1.0652075  | -1.6251116 | -0.2731286 |
| C  | 0.8906445  | -0.1807636 | 0.2190554  |
| C  | 0.5967405  | -0.0702826 | 1.7093234  |
| C  | 1.5441875  | 0.9201734  | 2.2975744  |
| N  | 2.4909186  | 1.1793804  | 1.3343214  |
| C  | 2.3019215  | 0.4210764  | 0.1213274  |
| C  | -0.4170815 | -0.6692076 | 2.3411744  |
| N  | 2.4558905  | -1.9266606 | 0.0531024  |
| C  | 3.2296645  | -0.7929976 | 0.0929604  |
| O  | 4.4435445  | -0.7261696 | 0.1438454  |
| O  | 1.5044775  | 1.4479654  | 3.3960464  |
| O  | -1.3980905 | -1.7918326 | -2.8001636 |
| Au | -3.3324565 | -0.5641436 | 0.2969704  |
| C  | -0.8067565 | -0.5136286 | 3.7672734  |
| C  | 2.7323805  | 4.7704564  | -1.5418866 |

|   |            |            |            |
|---|------------|------------|------------|
| C | 1.4286325  | 5.1951474  | -1.2739716 |
| C | 0.7792855  | 4.7544874  | -0.1182936 |
| C | 1.4320825  | 3.8784714  | 0.7382964  |
| C | 2.7253795  | 3.4258984  | 0.4726864  |
| C | 3.3661125  | 3.8875084  | -0.6783046 |
| C | 3.3311626  | 2.3681814  | 1.3579194  |
| O | 0.8648685  | 6.0176294  | -2.1907546 |
| C | -0.4769725 | 6.3963334  | -1.9803306 |
| H | 0.8002405  | -2.7997976 | -2.1084016 |
| H | -0.1169755 | 0.1432964  | 4.2998404  |
| H | -1.8148135 | -0.0803606 | 3.8205854  |
| H | -0.8542085 | -1.4887126 | 4.2684324  |
| H | 3.2165836  | 5.1281234  | -2.4472036 |
| H | -0.2390915 | 5.0502274  | 0.1103174  |
| H | 0.9091965  | 3.5296514  | 1.6298764  |
| H | 4.3734725  | 3.5390404  | -0.9072416 |
| H | 3.3771036  | 2.6808804  | 2.4076954  |
| H | 4.3430015  | 2.0963404  | 1.0321664  |
| H | -0.7749765 | 6.9793834  | -2.8542746 |
| H | -0.5844845 | 7.0191814  | -1.0808406 |
| H | -1.1364305 | 5.5223414  | -1.8807786 |
| P | -3.8972715 | -2.6190176 | -0.5468396 |
| C | -4.4832615 | -2.5149616 | -2.2638926 |
| H | -3.6700675 | -2.1012186 | -2.8700586 |
| H | -4.7606765 | -3.5097146 | -2.6322626 |

|   |            |            |            |
|---|------------|------------|------------|
| H | -5.3480735 | -1.8466366 | -2.3137946 |
| C | -5.2480994 | -3.4231406 | 0.3783644  |
| H | -5.5143474 | -4.3788046 | -0.0885846 |
| H | -4.9373115 | -3.5969326 | 1.4129904  |
| H | -6.1233474 | -2.7663256 | 0.3865924  |
| C | -2.5614615 | -3.8611316 | -0.5775496 |
| H | -2.9652115 | -4.8291056 | -0.8980656 |
| H | -1.7984125 | -3.5372266 | -1.2948636 |
| H | -2.1191015 | -3.9652036 | 0.4186664  |
| C | -4.6917275 | 3.2318764  | 0.9494114  |
| F | -5.6451095 | 2.3052814  | 0.9417024  |
| F | -5.0985654 | 4.2747024  | 0.2430774  |
| F | -4.4653595 | 3.6078714  | 2.1965934  |
| S | -3.1646215 | 2.5401074  | 0.2025314  |
| O | -2.8907725 | 1.3742874  | 1.1409504  |
| O | -2.1542345 | 3.5828034  | 0.3108504  |
| O | -3.5681045 | 2.0932214  | -1.1314436 |
| H | 2.4605125  | 1.0565534  | -0.7638796 |
| H | 0.3889255  | -2.2875256 | 0.2856854  |
| C | 3.0383045  | -3.2949196 | 0.0813824  |
| C | 3.9473385  | -3.4197586 | 1.3040954  |
| C | 1.9229755  | -4.3263306 | 0.2203344  |
| C | 3.8316755  | -3.5426926 | -1.2001456 |
| H | 4.7857666  | -2.7226946 | 1.2488664  |
| H | 3.3812355  | -3.2150026 | 2.2207064  |

|   |            |            |            |
|---|------------|------------|------------|
| H | 4.3403066  | -4.4419086 | 1.3624624  |
| H | 1.2290495  | -4.3289926 | -0.6291786 |
| H | 2.3763545  | -5.3225456 | 0.2705054  |
| H | 1.3519545  | -4.1752296 | 1.1452934  |
| H | 4.2953686  | -4.5364556 | -1.1695756 |
| H | 3.1842615  | -3.4993436 | -2.0848216 |
| H | 4.6240675  | -2.7953146 | -1.3061896 |
| H | 1.5231835  | -1.1975966 | -2.3337216 |
| H | -1.0547175 | -1.3312836 | 1.7390984  |
| H | -0.3158165 | 1.6231054  | -0.1405476 |
| H | -1.6514835 | 0.7422904  | -2.0109636 |

Zero-point correction= 0.627797 (Hartree/Particle)

Thermal correction to Energy= 0.673600

Thermal correction to Enthalpy= 0.674544

Thermal correction to Gibbs Free Energy= 0.545856

Sum of electronic and zero-point Energies= -2898.005066

Sum of electronic and thermal Energies= -2897.959264

Sum of electronic and thermal Enthalpies= -2897.958319

Sum of electronic and thermal Free Energies= -2898.087007

#### **C-int5**

|   |            |            |           |
|---|------------|------------|-----------|
| C | -0.0055687 | -1.6234559 | 2.5877163 |
| C | 0.6344393  | -1.1633349 | 1.5034153 |
| C | -1.3189297 | -1.1117149 | 2.9882713 |
| C | -1.8410677 | 0.0136201  | 2.1917373 |
| C | -1.2325657 | 0.4238531  | 1.0724843 |

|    |            |            |            |
|----|------------|------------|------------|
| C  | 0.0377133  | -0.1575839 | 0.5633773  |
| C  | -0.0654567 | -0.8498409 | -0.8185177 |
| C  | 1.2595363  | -0.6230649 | -1.4815367 |
| N  | 1.9406673  | 0.3008501  | -0.7160467 |
| C  | 1.0446033  | 0.9772421  | 0.1946123  |
| C  | -1.1181517 | -1.5442859 | -1.2996187 |
| N  | 1.4443913  | 2.8548271  | 1.7642163  |
| C  | 1.7325863  | 1.5683721  | 1.4112013  |
| O  | 2.4805093  | 0.8866351  | 2.0976623  |
| O  | 1.7096383  | -1.1134329 | -2.5023927 |
| O  | -1.9650277 | -1.5900639 | 3.9159943  |
| H  | 0.4671023  | 1.7517011  | -0.3356637 |
| Au | -2.8650887 | -1.8754119 | -0.1906937 |
| C  | -1.0908837 | -2.1778499 | -2.6630827 |
| C  | 0.8844893  | 4.0227251  | 1.0402723  |
| C  | -0.6176367 | 3.8938691  | 0.7873543  |
| C  | 1.6377053  | 4.2780061  | -0.2636297 |
| C  | 1.1098303  | 5.2052021  | 1.9805523  |
| C  | 5.7058533  | -1.6419409 | 0.3913343  |
| C  | 6.3619283  | -2.1378689 | -0.7403337 |
| C  | 5.9938543  | -1.6881319 | -2.0069997 |
| C  | 4.9747443  | -0.7449629 | -2.1264247 |
| C  | 4.3266344  | -0.2350889 | -1.0095257 |
| C  | 4.7000854  | -0.7020779 | 0.2564993  |
| C  | 3.2390234  | 0.7966661  | -1.1505277 |



|   |            |            |            |
|---|------------|------------|------------|
| O | 7.3362703  | -3.0535049 | -0.5022827 |
| C | 8.0108793  | -3.5910119 | -1.6101707 |
| H | -2.7807767 | 0.4549751  | 2.5228493  |
| H | -1.6889747 | 1.2117911  | 0.4750523  |
| H | 1.9374813  | 3.0820011  | 2.6215693  |
| H | -0.1699117 | -1.9873149 | -3.2199277 |
| H | -1.2183497 | -3.2634929 | -2.5563667 |
| H | -1.9571157 | -1.8393689 | -3.2499917 |
| H | -1.1380427 | 3.5690591  | 1.6958173  |
| H | -1.0233757 | 4.8662991  | 0.4842213  |
| H | -0.8548637 | 3.1915431  | -0.0199557 |
| H | 2.7100143  | 4.4046881  | -0.0713787 |
| H | 1.2630653  | 5.1932591  | -0.7377887 |
| H | 1.5115653  | 3.4629481  | -0.9860087 |
| H | 0.7434463  | 6.1291131  | 1.5211903  |
| H | 0.5733123  | 5.0595581  | 2.9262963  |
| H | 2.1773223  | 5.3371511  | 2.1980643  |
| H | 6.0103393  | -2.0147769 | 1.3662633  |
| H | 6.4773884  | -2.0691329 | -2.9016977 |
| H | 4.6648983  | -0.4154189 | -3.1170777 |
| H | 4.1824093  | -0.3211269 | 1.1370323  |
| H | 3.1705773  | 1.1248511  | -2.1986427 |
| H | 3.4707253  | 1.6797751  | -0.5399127 |
| H | 8.7424633  | -4.3003569 | -1.2168967 |
| H | 8.5391743  | -2.8145619 | -2.1830877 |

|   |            |            |            |
|---|------------|------------|------------|
| H | 7.3258863  | -4.1226989 | -2.2868437 |
| P | -4.9009406 | -2.2435219 | 0.9970133  |
| C | -4.7322817 | -2.8968449 | 2.6916893  |
| H | -4.0785537 | -2.2369209 | 3.2765023  |
| H | -5.7140787 | -2.9811429 | 3.1732883  |
| H | -4.2589027 | -3.8831389 | 2.6556733  |
| C | -6.0714597 | -3.3878719 | 0.1798043  |
| H | -6.9954786 | -3.4864079 | 0.7621723  |
| H | -6.3098266 | -3.0046199 | -0.8180997 |
| H | -5.6068477 | -4.3722409 | 0.0674763  |
| C | -5.8953606 | -0.7253109 | 1.2142813  |
| H | -6.8424436 | -0.9548989 | 1.7172933  |
| H | -5.3286986 | -0.0034759 | 1.8102473  |
| H | -6.0889996 | -0.2657469 | 0.2399093  |
| C | -4.9488797 | 0.6980891  | -2.6884937 |
| F | -4.7782017 | 0.9580281  | -3.9657357 |
| F | -6.1714446 | 1.0368321  | -2.3129967 |
| F | -4.7707197 | -0.5970839 | -2.4689877 |
| S | -3.7595927 | 1.6789671  | -1.6783787 |
| O | -2.3867087 | 1.0585471  | -2.1650457 |
| O | -4.0271427 | 1.3295401  | -0.2973157 |
| O | -3.8183007 | 3.0352711  | -2.1579397 |
| H | 1.6115453  | -1.5554749 | 1.2257173  |
| H | 0.4189163  | -2.4039999 | 3.2144903  |
| H | -2.1263677 | 0.2357231  | -1.6645947 |

Zero-point correction= 0.625459 (Hartree/Particle)

Thermal correction to Energy= 0.673098

Thermal correction to Enthalpy= 0.674042

Thermal correction to Gibbs Free Energy= 0.541388

Sum of electronic and zero-point Energies= -2897.940357

Sum of electronic and thermal Energies= -2897.892719

Sum of electronic and thermal Enthalpies= -2897.891775

Sum of electronic and thermal Free Energies= -2898.024429

### **C-ts5**

|   |            |            |            |
|---|------------|------------|------------|
| C | -0.0458536 | -1.3712207 | 2.6755321  |
| C | 0.5866794  | -1.0316187 | 1.5436181  |
| C | -1.3192506 | -0.7597187 | 3.0705661  |
| C | -1.8355816 | 0.2887863  | 2.1718731  |
| C | -1.2386836 | 0.5740733  | 1.0093161  |
| C | 0.0192414  | -0.0682767 | 0.5432351  |
| C | -0.0932796 | -0.8208437 | -0.8021849 |
| C | 1.2345184  | -0.6569867 | -1.4726669 |
| N | 1.9383044  | 0.2847793  | -0.7504979 |
| C | 1.0572284  | 1.0253893  | 0.1246931  |
| C | -1.1626996 | -1.4967197 | -1.2718009 |
| N | 1.5065744  | 2.9602193  | 1.6156291  |
| C | 1.7608774  | 1.6541103  | 1.3139541  |
| O | 2.4909844  | 0.9825383  | 2.0291871  |
| O | 1.6694564  | -1.2137377 | -2.4655039 |
| O | -1.9384826 | -1.0995977 | 4.0734811  |

|    |            |            |            |
|----|------------|------------|------------|
| H  | 0.4970684  | 1.7858973  | -0.4437809 |
| Au | -2.8701906 | -1.8385467 | -0.1048469 |
| C  | -1.1329446 | -2.1680817 | -2.6183249 |
| C  | 0.9951764  | 4.1157433  | 0.8394891  |
| C  | -0.5119416 | 4.0364463  | 0.6018841  |
| C  | 1.7500804  | 4.2786843  | -0.4781529 |
| C  | 1.2758774  | 5.3311353  | 1.7211061  |
| C  | 5.6061674  | -1.7525947 | 0.4509351  |
| C  | 6.2845484  | -2.2823327 | -0.6519649 |
| C  | 5.9675034  | -1.8434617 | -1.9360569 |
| C  | 4.9762774  | -0.8776067 | -2.1010629 |
| C  | 4.3065954  | -0.3347707 | -1.0130349 |
| C  | 4.6286274  | -0.7908527 | 0.2709611  |
| C  | 3.2503294  | 0.7210953  | -1.2056729 |
| O  | 7.2273944  | -3.2182127 | -0.3696409 |
| C  | 7.9204534  | -3.7915467 | -1.4477499 |
| H  | -2.7620656 | 0.7803093  | 2.4686281  |
| H  | -1.6867696 | 1.3125123  | 0.3463811  |
| H  | 2.0113494  | 3.2068023  | 2.4606951  |
| H  | -0.3538966 | -1.7830507 | -3.2826099 |
| H  | -0.9345076 | -3.2399007 | -2.4769069 |
| H  | -2.1119546 | -2.1025887 | -3.1092189 |
| H  | -1.0374846 | 3.7903503  | 1.5317081  |
| H  | -0.8793216 | 5.0046133  | 0.2413981  |
| H  | -0.7824336 | 3.2940863  | -0.1574819 |

|   |            |            |            |
|---|------------|------------|------------|
| H | 2.8269894  | 4.3790623  | -0.2961449 |
| H | 1.4040404  | 5.1812033  | -0.9964209 |
| H | 1.5934244  | 3.4336453  | -1.1586919 |
| H | 0.9539504  | 6.2475283  | 1.2156021  |
| H | 0.7326294  | 5.2580833  | 2.6713811  |
| H | 2.3483494  | 5.4230813  | 1.9346481  |
| H | 5.8709954  | -2.1174757 | 1.4403601  |
| H | 6.4680064  | -2.2505857 | -2.8096479 |
| H | 4.7045804  | -0.5571477 | -3.1059979 |
| H | 4.0952554  | -0.3811207 | 1.1288681  |
| H | 3.1914154  | 0.9956093  | -2.2697659 |
| H | 3.5079464  | 1.6280743  | -0.6421019 |
| H | 8.6222034  | -4.5116527 | -1.0210819 |
| H | 8.4845794  | -3.0385437 | -2.0178229 |
| H | 7.2423694  | -4.3180387 | -2.1353869 |
| P | -4.8692156 | -2.2333407 | 1.1384661  |
| C | -4.7107626 | -2.2799147 | 2.9554481  |
| H | -4.2821956 | -1.3450397 | 3.3315761  |
| H | -5.6869716 | -2.4638967 | 3.4204311  |
| H | -4.0132546 | -3.0740377 | 3.2405541  |
| C | -5.7337626 | -3.7989407 | 0.7512771  |
| H | -6.6879496 | -3.8589277 | 1.2885401  |
| H | -5.9180976 | -3.8608817 | -0.3258139 |
| H | -5.1028596 | -4.6447787 | 1.0417421  |
| C | -6.1419616 | -0.9566527 | 0.8365541  |

|   |            |            |            |
|---|------------|------------|------------|
| H | -7.0585176 | -1.1836537 | 1.3944221  |
| H | -5.7475246 | 0.0170863  | 1.1447041  |
| H | -6.3642936 | -0.8996087 | -0.2349409 |
| C | -5.0464206 | 0.4603543  | -2.6791149 |
| F | -5.0526486 | 0.8247143  | -3.9417359 |
| F | -6.2619396 | 0.5745153  | -2.1648809 |
| F | -4.6555816 | -0.8019127 | -2.5838459 |
| S | -3.9170826 | 1.5555613  | -1.7094459 |
| O | -2.5066576 | 1.0146323  | -2.1830539 |
| O | -4.1528106 | 1.2342683  | -0.3157619 |
| O | -4.0698746 | 2.8899973  | -2.2277939 |
| H | 1.5374354  | -1.4914127 | 1.2782171  |
| H | 0.3608264  | -2.1155917 | 3.3559791  |
| H | -2.2285826 | 0.1804343  | -1.6944309 |

Zero-point correction= 0.620556 (Hartree/Particle)

Thermal correction to Energy= 0.667735

Thermal correction to Enthalpy= 0.668679

Thermal correction to Gibbs Free Energy= 0.536728

Sum of electronic and zero-point Energies= -2897.936180

Sum of electronic and thermal Energies= -2897.889001

Sum of electronic and thermal Enthalpies= -2897.888057

Sum of electronic and thermal Free Energies= -2898.020008

### **C-int6**

|   |            |            |            |
|---|------------|------------|------------|
| C | 0.0213621  | -1.2468881 | -2.8442638 |
| C | -0.5481379 | -1.0442481 | -1.6478848 |

|    |            |            |            |
|----|------------|------------|------------|
| C  | 1.2107421  | -0.5089901 | -3.2802768 |
| C  | 1.8237641  | 0.3869909  | -2.2550178 |
| C  | 1.2968451  | 0.5112989  | -0.9981838 |
| C  | 0.0127311  | -0.1286791 | -0.5978188 |
| C  | -0.0119419 | -0.8343391 | 0.7587522  |
| C  | -1.3789069 | -0.6368301 | 1.3229412  |
| N  | -1.9777709 | 0.3371799  | 0.5557512  |
| C  | -0.9966239 | 1.0374099  | -0.2471908 |
| C  | 1.0131311  | -1.4130931 | 1.3902122  |
| N  | -1.2260289 | 2.9792359  | -1.7680238 |
| C  | -1.5835629 | 1.6965139  | -1.4826368 |
| O  | -2.3094309 | 1.0604509  | -2.2348848 |
| O  | -1.8997409 | -1.1815961 | 2.2789322  |
| O  | 1.6954341  | -0.6063821 | -4.3953048 |
| H  | -0.4327549 | 1.7602569  | 0.3622842  |
| Au | 3.3271081  | -0.9707071 | -1.1328618 |
| C  | 1.0009871  | -2.0009961 | 2.7556772  |
| C  | -0.6958969 | 4.1071459  | -0.9536198 |
| C  | 0.7832301  | 3.9405329  | -0.6122878 |
| C  | -1.5315189 | 4.3125109  | 0.3079262  |
| C  | -0.8494429 | 5.3326449  | -1.8518958 |
| C  | -5.7008659 | -1.4699101 | -0.8632498 |
| C  | -6.4571789 | -1.9683391 | 0.2031892  |
| C  | -6.1751270 | -1.5562211 | 1.5043082  |
| C  | -5.1403679 | -0.6487831 | 1.7230462  |

|   |            |            |            |
|---|------------|------------|------------|
| C | -4.3921369 | -0.1376491 | 0.6710842  |
| C | -4.6808830 | -0.5653181 | -0.6304948 |
| C | -3.2903529 | 0.8573219  | 0.9198882  |
| O | -7.4364229 | -2.8475201 | -0.1297988 |
| C | -8.2171889 | -3.3792471 | 0.9096172  |
| H | 2.6147381  | 1.0609349  | -2.5968818 |
| H | 1.7483711  | 1.1906599  | -0.2699058 |
| H | -1.6587229 | 3.2565829  | -2.6434498 |
| H | -0.0061949 | -2.0399861 | 3.1733602  |
| H | 1.4288221  | -3.0116691 | 2.7415582  |
| H | 1.6444331  | -1.3971091 | 3.4094062  |
| H | 1.3602531  | 3.6836409  | -1.5091528 |
| H | 1.1746701  | 4.8869459  | -0.2209908 |
| H | 0.9798311  | 3.1898689  | 0.1612152  |
| H | -2.5880579 | 4.4615339  | 0.0530252  |
| H | -1.1787559 | 5.2013289  | 0.8443382  |
| H | -1.4579289 | 3.4681949  | 1.0032882  |
| H | -0.4965749 | 6.2278219  | -1.3297488 |
| H | -0.2578959 | 5.2209099  | -2.7690448 |
| H | -1.8998729 | 5.4938369  | -2.1264618 |
| H | -5.9419140 | -1.8110861 | -1.8670908 |
| H | -6.7383510 | -1.9383021 | 2.3505442  |
| H | -4.9014969 | -0.3474931 | 2.7419892  |
| H | -4.0877099 | -0.1797391 | -1.4597888 |
| H | -3.2817119 | 1.1491819  | 1.9806312  |



|   |            |            |            |
|---|------------|------------|------------|
| H | -3.4543769 | 1.7668269  | 0.3269572  |
| H | -8.9384559 | -4.0548801 | 0.4446712  |
| H | -8.7627149 | -2.5937921 | 1.4531142  |
| H | -7.6079099 | -3.9464531 | 1.6284902  |
| P | 5.0609931  | -2.4380251 | -0.5900978 |
| C | 5.5847141  | -3.5442171 | -1.9417878 |
| H | 5.8881631  | -2.9462691 | -2.8063208 |
| H | 6.4250271  | -4.1701191 | -1.6187648 |
| H | 4.7476551  | -4.1821031 | -2.2407538 |
| C | 4.6896161  | -3.5541591 | 0.8026672  |
| H | 5.5429921  | -4.2151111 | 0.9954402  |
| H | 4.4846021  | -2.9558011 | 1.6950172  |
| H | 3.8063861  | -4.1563531 | 0.5675082  |
| C | 6.5608711  | -1.5327981 | -0.1036488 |
| H | 7.3611501  | -2.2322691 | 0.1651752  |
| H | 6.8842051  | -0.8995001 | -0.9353918 |
| H | 6.3302701  | -0.8787751 | 0.7421712  |
| H | 1.9843901  | -1.4194211 | 0.8849272  |
| C | 4.4811051  | 0.4921269  | 2.5870462  |
| F | 5.8124961  | 0.4377139  | 2.6006442  |
| F | 4.0415731  | -0.7391691 | 2.2429312  |
| F | 4.0518761  | 0.7435149  | 3.8105052  |
| S | 3.8838491  | 1.7452719  | 1.3828802  |
| O | 4.5392491  | 2.9744479  | 1.8018072  |
| O | 2.4213541  | 1.6738249  | 1.5638012  |

|   |            |            |            |
|---|------------|------------|------------|
| O | 4.3523121  | 1.1756139  | 0.0931312  |
| H | -1.4692409 | -1.5620601 | -1.3839138 |
| H | -0.4111309 | -1.9278821 | -3.5729588 |

Zero-point correction= 0.626347 (Hartree/Particle)

Thermal correction to Energy= 0.673959

Thermal correction to Enthalpy= 0.674903

Thermal correction to Gibbs Free Energy= 0.541801

Sum of electronic and zero-point Energies= -2897.958090

Sum of electronic and thermal Energies= -2897.910478

Sum of electronic and thermal Enthalpies= -2897.909534

Sum of electronic and thermal Free Energies= -2898.042637

#### **C-ts6**

|   |            |           |            |
|---|------------|-----------|------------|
| C | -0.8086345 | 0.4671422 | 3.4623855  |
| C | -1.2593795 | 1.1623982 | 2.4195005  |
| C | 0.6343685  | 0.2013142 | 3.6562095  |
| C | 1.5595505  | 0.6728652 | 2.5778695  |
| C | 1.0934155  | 1.6757592 | 1.7014325  |
| C | -0.3718865 | 1.7330172 | 1.3375545  |
| C | -0.8700595 | 3.1209422 | 0.9797005  |
| C | -1.7279425 | 3.0134582 | -0.2314455 |
| N | -1.6263695 | 1.7085582 | -0.6698875 |
| C | -0.6543785 | 0.9126722 | 0.0460685  |
| C | -0.6160695 | 4.2307862 | 1.6822275  |
| N | 1.7526015  | 1.3638432 | -0.3484075 |
| C | 0.5878315  | 0.6893022 | -0.8182755 |

|    |            |            |            |
|----|------------|------------|------------|
| O  | 0.5225765  | 0.0175092  | -1.8225535 |
| O  | -2.4185515 | 3.8641362  | -0.7624745 |
| O  | 1.0478225  | -0.3416788 | 4.6666945  |
| Au | 1.4264465  | -1.3309028 | 1.5106555  |
| C  | -1.0761635 | 5.6090722  | 1.3667895  |
| C  | -3.1275335 | -2.5254518 | -1.9386465 |
| C  | -4.0013875 | -2.6709328 | -0.8577715 |
| C  | -4.3695935 | -1.5493248 | -0.1102785 |
| C  | -3.8511835 | -0.3024198 | -0.4500225 |
| C  | -2.9673105 | -0.1457378 | -1.5154655 |
| C  | -2.6130265 | -1.2778008 | -2.2537695 |
| C  | -2.3617635 | 1.1979232  | -1.8150085 |
| O  | -4.4159444 | -3.9350408 | -0.6008255 |
| C  | -5.2569925 | -4.1371848 | 0.5096945  |
| H  | -1.7051935 | 5.6302052  | 0.4752735  |
| H  | -1.6365355 | 6.0267132  | 2.2125265  |
| H  | -0.2109685 | 6.2683092  | 1.2179445  |
| H  | -2.8570865 | -3.4132038 | -2.5059595 |
| H  | -5.0541905 | -1.6341998 | 0.7284225  |
| H  | -4.1374815 | 0.5722952  | 0.1349715  |
| H  | -1.9129665 | -1.1765218 | -3.0822385 |
| H  | -3.1197975 | 1.9609562  | -2.0339995 |
| H  | -1.7014855 | 1.1253552  | -2.6914345 |
| H  | -5.4646245 | -5.2080038 | 0.5523055  |
| H  | -6.2064955 | -3.5935728 | 0.4062325  |

|   |            |            |            |
|---|------------|------------|------------|
| H | -4.7699745 | -3.8277948 | 1.4468265  |
| P | 0.5607285  | -3.2791268 | 0.5540395  |
| C | 1.3664005  | -4.8506868 | 1.0071485  |
| H | 1.3430105  | -4.9742928 | 2.0940735  |
| H | 0.8481315  | -5.6920578 | 0.5319075  |
| H | 2.4100935  | -4.8319578 | 0.6816385  |
| C | 0.5083285  | -3.2696998 | -1.2652955 |
| H | -0.0029755 | -4.1691148 | -1.6297485 |
| H | -0.0275815 | -2.3741288 | -1.5997785 |
| H | 1.5257505  | -3.2266618 | -1.6610345 |
| C | -1.1860415 | -3.5056168 | 1.0436635  |
| H | -1.6211495 | -4.3860228 | 0.5530055  |
| H | -1.2478785 | -3.6176028 | 2.1310775  |
| H | -1.7619845 | -2.6182788 | 0.7501925  |
| H | -1.0747625 | -0.0802968 | 0.2751085  |
| H | 1.6583955  | 2.5993432  | 1.6029605  |
| C | 2.3536865  | 2.4171232  | -1.2625615 |
| C | 1.2874465  | 3.4268632  | -1.6582795 |
| C | 3.4625635  | 3.0793792  | -0.4549685 |
| C | 2.9502625  | 1.7640422  | -2.5066925 |
| H | 0.4740875  | 2.9628582  | -2.2339465 |
| H | 0.8569255  | 3.9368092  | -0.7874635 |
| H | 1.7408715  | 4.1890402  | -2.3016865 |
| H | 4.1875355  | 2.3337292  | -0.1059945 |
| H | 3.9976285  | 3.7927082  | -1.0925165 |

|   |            |            |            |
|---|------------|------------|------------|
| H | 3.0657005  | 3.6364322  | 0.4035505  |
| H | 3.3823815  | 2.5490882  | -3.1401285 |
| H | 3.7547115  | 1.0716832  | -2.2367285 |
| H | 2.1924645  | 1.2284792  | -3.0860165 |
| H | 0.0088225  | 4.1195032  | 2.5746505  |
| H | 2.5953566  | 0.7552552  | 2.9104565  |
| H | 2.5093535  | 0.6811222  | -0.1345005 |
| C | 4.2017725  | -1.9710048 | -1.1904215 |
| F | 3.1794405  | -1.4089948 | -1.8463225 |
| F | 3.7144575  | -3.0400728 | -0.5394755 |
| F | 5.0870025  | -2.3974958 | -2.0731855 |
| S | 4.9493475  | -0.7757388 | -0.0101965 |
| O | 5.4998406  | 0.2584122  | -0.8867975 |
| O | 5.8644165  | -1.5818308 | 0.7809905  |
| O | 3.7302815  | -0.3089808 | 0.7298425  |
| H | -2.3267305 | 1.3314282  | 2.2684945  |
| H | -1.4717385 | 0.0716002  | 4.2281155  |

Zero-point correction= 0.626080 (Hartree/Particle)

Thermal correction to Energy= 0.671809

Thermal correction to Enthalpy= 0.672753

Thermal correction to Gibbs Free Energy= 0.548048

Sum of electronic and zero-point Energies= -2897.934342

Sum of electronic and thermal Energies= -2897.888613

Sum of electronic and thermal Enthalpies= -2897.887669

Sum of electronic and thermal Free Energies= -2898.012374

**C-int7**

|    |            |            |            |
|----|------------|------------|------------|
| C  | -0.3380027 | 1.2045244  | 3.5825624  |
| C  | -0.9775837 | 1.5942394  | 2.4800364  |
| C  | 1.1078943  | 0.8570524  | 3.5706324  |
| C  | 1.7272503  | 0.7443674  | 2.2327654  |
| C  | 1.2394613  | 1.7707064  | 1.2238664  |
| C  | -0.3064007 | 1.8878154  | 1.1648614  |
| C  | -0.8390527 | 3.2361024  | 0.6997314  |
| C  | -1.6745637 | 3.0355544  | -0.5120776 |
| N  | -1.6213607 | 1.6866804  | -0.8086106 |
| C  | -0.7327877 | 0.9285934  | 0.0403184  |
| C  | -0.6464427 | 4.3911584  | 1.3470294  |
| N  | 1.6915583  | 1.3322464  | -0.1772686 |
| C  | 0.5259573  | 0.5695634  | -0.7271356 |
| O  | 0.6097933  | -0.1503626 | -1.6779866 |
| O  | -2.3085127 | 3.8500594  | -1.1583066 |
| O  | 1.6832763  | 0.5981714  | 4.6173774  |
| Au | 1.2123513  | -1.2753806 | 1.6388544  |
| C  | -1.1426577 | 5.7340944  | 0.9465044  |
| C  | -3.1094767 | -2.6212336 | -1.8775326 |
| C  | -4.0122147 | -2.6994936 | -0.8139756 |
| C  | -4.3860177 | -1.5350616 | -0.1373876 |
| C  | -3.8457247 | -0.3133996 | -0.5294966 |
| C  | -2.9338467 | -0.2236286 | -1.5794306 |
| C  | -2.5726217 | -1.3976046 | -2.2448776 |

|   |            |            |            |
|---|------------|------------|------------|
| C | -2.3098697 | 1.0950424  | -1.9435316 |
| O | -4.4462557 | -3.9429896 | -0.4990966 |
| C | -5.3114697 | -4.0772496 | 0.6035514  |
| H | -1.7585577 | 5.6864554  | 0.0469214  |
| H | -1.7225857 | 6.1857084  | 1.7609244  |
| H | -0.2941247 | 6.4083324  | 0.7679424  |
| H | -2.8304077 | -3.5411556 | -2.3861676 |
| H | -5.0894957 | -1.5681696 | 0.6892394  |
| H | -4.1312267 | 0.5924934  | 0.0062744  |
| H | -1.8464837 | -1.3499306 | -3.0560186 |
| H | -3.0520587 | 1.8420004  | -2.2537666 |
| H | -1.6115757 | 0.9603004  | -2.7840446 |
| H | -5.5303347 | -5.1423656 | 0.6992804  |
| H | -6.2532417 | -3.5317516 | 0.4513564  |
| H | -4.8387587 | -3.7220266 | 1.5314574  |
| P | 0.3671063  | -3.3506816 | 0.8674414  |
| C | 1.1711843  | -4.8994016 | 1.4053154  |
| H | 1.1616693  | -4.9617706 | 2.4975934  |
| H | 0.6481773  | -5.7669516 | 0.9854504  |
| H | 2.2111933  | -4.9016406 | 1.0664984  |
| C | 0.3174883  | -3.4728656 | -0.9513836 |
| H | -0.2274247 | -4.3741466 | -1.2586086 |
| H | -0.1808597 | -2.5830596 | -1.3538806 |
| H | 1.3371363  | -3.4986196 | -1.3418306 |
| C | -1.3867887 | -3.5674806 | 1.3444494  |

|   |            |            |            |
|---|------------|------------|------------|
| H | -1.8079357 | -4.4767076 | 0.8960554  |
| H | -1.4708537 | -3.6181406 | 2.4347694  |
| H | -1.9600997 | -2.7009306 | 0.9899914  |
| H | -1.2083097 | 0.0000414  | 0.3908564  |
| H | 1.6765423  | 2.7628014  | 1.4003444  |
| C | 2.3709383  | 2.3652984  | -1.1569566 |
| C | 1.4237293  | 3.4912244  | -1.5175346 |
| C | 3.6086683  | 2.8713984  | -0.4306396 |
| C | 2.7833423  | 1.6160504  | -2.4172866 |
| H | 0.5090753  | 3.1248634  | -2.0032706 |
| H | 1.1487083  | 4.1155074  | -0.6627906 |
| H | 1.9347933  | 4.1304394  | -2.2462246 |
| H | 4.2789573  | 2.0451354  | -0.1722506 |
| H | 4.1478193  | 3.5418284  | -1.1087856 |
| H | 3.3683583  | 3.4448034  | 0.4712994  |
| H | 3.4048933  | 2.2995434  | -3.0067606 |
| H | 3.3945413  | 0.7343554  | -2.2044216 |
| H | 1.9243543  | 1.3291804  | -3.0292216 |
| H | -0.0407467 | 4.3465934  | 2.2586304  |
| H | 2.8196813  | 0.7497944  | 2.3100624  |
| H | 2.4800973  | 0.6238624  | -0.0502336 |
| C | 4.0357913  | -2.3392856 | -1.1826816 |
| F | 3.0063903  | -1.8888816 | -1.9070136 |
| F | 3.5397743  | -3.1823136 | -0.2643476 |
| F | 4.8438163  | -3.0216166 | -1.9760446 |



|   |            |            |            |
|---|------------|------------|------------|
| S | 4.9087683  | -0.9414496 | -0.3760936 |
| O | 5.3806373  | -0.1365206 | -1.5032826 |
| O | 5.8905283  | -1.5773556 | 0.4856634  |
| O | 3.7707123  | -0.3012126 | 0.3603794  |
| H | -2.0521507 | 1.7877444  | 2.4891974  |
| H | -0.8535317 | 1.0811054  | 4.5327724  |

Zero-point correction= 0.628608 (Hartree/Particle)

Thermal correction to Energy= 0.674234

Thermal correction to Enthalpy= 0.675179

Thermal correction to Gibbs Free Energy= 0.551067

Sum of electronic and zero-point Energies= -2897.960909

Sum of electronic and thermal Energies= -2897.915283

Sum of electronic and thermal Enthalpies= -2897.914339

Sum of electronic and thermal Free Energies= -2898.038450

### **C-ts7**

|   |            |           |            |
|---|------------|-----------|------------|
| C | -0.7506361 | 0.8045260 | 3.2972594  |
| C | -1.5930001 | 1.1818710 | 2.3321014  |
| C | 0.7176809  | 0.9163150 | 3.1684944  |
| C | 1.2394799  | 1.4560000 | 1.8715934  |
| C | 0.2844479  | 2.3076660 | 1.0356184  |
| C | -1.1726331 | 1.8219050 | 1.0415344  |
| C | -2.1963901 | 2.8789410 | 0.6469314  |
| C | -3.1163181 | 2.2791300 | -0.3641156 |
| N | -2.5812571 | 1.0517860 | -0.6977166 |
| C | -1.2640951 | 0.8569260 | -0.1508256 |

|    |            |            |            |
|----|------------|------------|------------|
| C  | -2.2868461 | 4.1064880  | 1.1707414  |
| N  | 0.7918349  | 2.0665580  | -0.3614166 |
| C  | -0.1795181 | 1.3339290  | -1.1042966 |
| O  | -0.1504501 | 1.1034000  | -2.2859696 |
| O  | -4.1502211 | 2.7296160  | -0.8226056 |
| O  | 1.4537959  | 0.5535720  | 4.0725934  |
| Au | 1.7687979  | -0.6868610 | 1.1256364  |
| C  | -3.2878801 | 5.1525540  | 0.8331244  |
| C  | -2.0426961 | -3.4322010 | -1.8173966 |
| C  | -2.7324351 | -3.9537210 | -0.7200146 |
| C  | -3.5574151 | -3.1204000 | 0.0395234  |
| C  | -3.6790851 | -1.7780550 | -0.3093536 |
| C  | -3.0009661 | -1.2453550 | -1.4039236 |
| C  | -2.1718811 | -2.0910800 | -2.1461446 |
| C  | -3.1277741 | 0.2112100  | -1.7508116 |
| O  | -2.5121991 | -5.2650450 | -0.4533756 |
| C  | -3.2036951 | -5.8398640 | 0.6305934  |
| H  | -4.0034531 | 4.8009420  | 0.0883144  |
| H  | -3.8302001 | 5.4597850  | 1.7361774  |
| H  | -2.7822351 | 6.0522610  | 0.4596004  |
| H  | -1.4081211 | -4.1021650 | -2.3934386 |
| H  | -4.1037381 | -3.5027510 | 0.8967354  |
| H  | -4.3203271 | -1.1269630 | 0.2852564  |
| H  | -1.6229291 | -1.6875280 | -2.9968686 |
| H  | -4.1749201 | 0.5207700  | -1.8583316 |

|   |            |            |            |
|---|------------|------------|------------|
| H | -2.6195281 | 0.4205120  | -2.7019976 |
| H | -2.9107121 | -6.8908970 | 0.6642504  |
| H | -4.2924581 | -5.7758330 | 0.4970264  |
| H | -2.9336021 | -5.3612460 | 1.5841394  |
| P | 1.5478239  | -2.9744380 | 0.6865364  |
| C | 2.7790689  | -4.1060130 | 1.4094384  |
| H | 2.7679039  | -4.0077970 | 2.4991554  |
| H | 2.5475469  | -5.1414920 | 1.1328804  |
| H | 3.7754689  | -3.8407490 | 1.0476484  |
| C | 1.5411549  | -3.3333950 | -1.0987126 |
| H | 1.3481069  | -4.3988630 | -1.2740606 |
| H | 0.7546239  | -2.7352370 | -1.5731076 |
| H | 2.5056459  | -3.0467380 | -1.5248616 |
| C | -0.0569701 | -3.6069990 | 1.2849304  |
| H | -0.2306471 | -4.6338710 | 0.9368544  |
| H | -0.0731761 | -3.5743820 | 2.3793214  |
| H | -0.8597291 | -2.9635870 | 0.9046924  |
| H | -1.0805921 | -0.1976140 | 0.1163744  |
| H | 0.3415279  | 3.3750670  | 1.2785854  |
| C | 1.6793439  | 3.0982150  | -1.0546976 |
| C | 0.7789899  | 4.2310300  | -1.5308236 |
| C | 2.7180699  | 3.6033530  | -0.0612836 |
| C | 2.4086499  | 2.4363550  | -2.2175996 |
| H | 0.0189499  | 3.8721980  | -2.2346966 |
| H | 0.2742299  | 4.7331250  | -0.6947906 |

|   |            |            |            |
|---|------------|------------|------------|
| H | 1.3896429  | 4.9792510  | -2.0490956 |
| H | 3.3848459  | 2.7959820  | 0.2625664  |
| H | 3.3381349  | 4.3449950  | -0.5760276 |
| H | 2.2756369  | 4.1033410  | 0.8091074  |
| H | 3.1817419  | 3.1267650  | -2.5719096 |
| H | 2.9312749  | 1.5348780  | -1.8850056 |
| H | 1.7403129  | 2.1926980  | -3.0440336 |
| H | -1.5414461 | 4.3797240  | 1.9255784  |
| H | 2.2057579  | 1.9415170  | 2.0416384  |
| H | 1.4700489  | 1.0985850  | 0.4072404  |
| C | 4.7419679  | -1.0335720 | -1.1919606 |
| F | 3.5808829  | -0.8377200 | -1.8375756 |
| F | 4.5822479  | -2.1431120 | -0.4463436 |
| F | 5.6777129  | -1.2799840 | -2.0914136 |
| S | 5.1801319  | 0.4114270  | -0.1384626 |
| O | 5.3068679  | 1.4965820  | -1.1112946 |
| O | 6.3790529  | -0.0385340 | 0.5548344  |
| O | 3.9662599  | 0.5368870  | 0.7195384  |
| H | -2.6679231 | 1.0305330  | 2.4452784  |
| H | -1.1055671 | 0.3648880  | 4.2269174  |

Zero-point correction= 0.620415 (Hartree/Particle)

Thermal correction to Energy= 0.666912

Thermal correction to Enthalpy= 0.667857

Thermal correction to Gibbs Free Energy= 0.539130

Sum of electronic and zero-point Energies= -2897.913166

Sum of electronic and thermal Energies= -2897.866669

Sum of electronic and thermal Enthalpies= -2897.865725

Sum of electronic and thermal Free Energies= -2897.994451

**D-1**

|    |            |            |            |
|----|------------|------------|------------|
| C  | 0.9939333  | -1.0635244 | 2.5297874  |
| C  | 0.1725873  | -0.3362314 | 1.6810724  |
| C  | 0.7243533  | -2.4095054 | 2.7852954  |
| C  | -0.3870167 | -3.0170204 | 2.2023104  |
| C  | -1.2108777 | -2.2712294 | 1.3649484  |
| C  | -0.9390747 | -0.9338414 | 1.0768364  |
| C  | -0.6537377 | -1.5419444 | -1.8938806 |
| C  | -0.7306327 | -0.0650944 | -1.9969436 |
| N  | -1.2332277 | 0.5888526  | -0.9175976 |
| C  | -1.8821757 | -0.1641844 | 0.1807224  |
| C  | -0.6210017 | -2.7610024 | -2.0394466 |
| N  | -4.0305367 | 0.9863096  | 0.7190494  |
| C  | -2.7193037 | 0.8138286  | 1.0215504  |
| O  | -2.1821757 | 1.4549466  | 1.9122644  |
| O  | -0.2845077 | 0.4606116  | -3.0026036 |
| O  | 1.5973183  | -3.0678154 | 3.5839354  |
| H  | -2.5533687 | -0.8941794 | -0.2866976 |
| Au | 1.4508603  | -1.8073654 | -0.9622496 |
| C  | -0.6703137 | -4.2030644 | -2.1898776 |
| C  | -4.9835117 | 0.3023676  | -0.1897326 |
| C  | -5.2356207 | -1.1328074 | 0.2671944  |

|   |            |            |            |
|---|------------|------------|------------|
| C | -4.5241167 | 0.3556036  | -1.6450766 |
| C | -6.2825457 | 1.0951826  | -0.0671696 |
| C | 1.6989983  | 3.4793336  | 1.1227094  |
| C | 2.7318493  | 3.5773426  | 0.1832474  |
| C | 2.4984123  | 3.2041636  | -1.1427356 |
| C | 1.2452213  | 2.7141736  | -1.5090776 |
| C | 0.2132883  | 2.5990036  | -0.5783036 |
| C | 0.4545393  | 3.0077406  | 0.7404234  |
| C | -1.1373077 | 2.0694046  | -0.9825226 |
| O | 3.9159203  | 4.0272786  | 0.6552894  |
| C | 4.9629443  | 4.2293626  | -0.2649316 |
| H | -0.6125927 | -4.0624924 | 2.4095914  |
| H | -2.0807437 | -2.7519134 | 0.9150784  |
| H | -4.4469487 | 1.6563316  | 1.3585554  |
| H | 1.2752433  | -3.9565874 | 3.7738114  |
| H | -1.6103977 | -4.4853684 | -2.6770726 |
| H | 0.1529703  | -4.5665814 | -2.8132026 |
| H | -0.6247107 | -4.7021194 | -1.2151746 |
| H | -5.5950137 | -1.1500524 | 1.3020944  |
| H | -5.9965207 | -1.6014444 | -0.3680656 |
| H | -4.3336427 | -1.7547214 | 0.2132174  |
| H | -4.2779307 | 1.3833336  | -1.9368276 |
| H | -5.3342697 | 0.0036046  | -2.2938646 |
| H | -3.6538117 | -0.2775724 | -1.8499216 |
| H | -7.0582067 | 0.6482986  | -0.6972536 |

|   |            |            |            |
|---|------------|------------|------------|
| H | -6.6504607 | 1.0932986  | 0.9664564  |
| H | -6.1401087 | 2.1338246  | -0.3881396 |
| H | 1.8973863  | 3.8016496  | 2.1418064  |
| H | 3.2728183  | 3.3061596  | -1.8982316 |
| H | 1.0628513  | 2.4242856  | -2.5419566 |
| H | -0.3499367 | 2.9398386  | 1.4731124  |
| H | -1.3609507 | 2.3456276  | -2.0182366 |
| H | -1.9217217 | 2.4913966  | -0.3507546 |
| H | 5.8039103  | 4.6295746  | 0.3037914  |
| H | 4.6828363  | 4.9487066  | -1.0463036 |
| H | 5.2707313  | 3.2872526  | -0.7440926 |
| P | 3.6068663  | -1.4652934 | -0.1451786 |
| C | 4.1298223  | -2.5874734 | 1.1870774  |
| H | 4.1703483  | -3.6104914 | 0.8000644  |
| H | 5.1280313  | -2.2974644 | 1.5360704  |
| H | 3.4272683  | -2.5598104 | 2.0266524  |
| C | 3.7929553  | 0.2336736  | 0.4719264  |
| H | 4.8172303  | 0.4013426  | 0.8259764  |
| H | 3.5579713  | 0.9364186  | -0.3370316 |
| H | 3.0872273  | 0.4194936  | 1.2869434  |
| C | 4.8769763  | -1.6392964 | -1.4379706 |
| H | 5.8672783  | -1.4203624 | -1.0216356 |
| H | 4.8703833  | -2.6586524 | -1.8351626 |
| H | 4.6656293  | -0.9442694 | -2.2562206 |
| H | 0.3929163  | 0.7109276  | 1.4864554  |

|   |           |            |           |
|---|-----------|------------|-----------|
| H | 1.8391403 | -0.5997684 | 3.0358264 |
|---|-----------|------------|-----------|

Zero-point correction= 0.594033 (Hartree/Particle)

Thermal correction to Energy= 0.634457

Thermal correction to Enthalpy= 0.635402

Thermal correction to Gibbs Free Energy= 0.519635

Sum of electronic and zero-point Energies= -1936.559135

Sum of electronic and thermal Energies= -1936.518711

Sum of electronic and thermal Enthalpies= -1936.517767

Sum of electronic and thermal Free Energies= -1936.633534

### **D-ts1**

|   |            |            |            |
|---|------------|------------|------------|
| C | -1.8292047 | -0.1510389 | 1.8169043  |
| C | -0.7177267 | -0.2610329 | 1.0032823  |
| C | -2.6909527 | 0.9371771  | 1.6583733  |
| C | -2.4786457 | 1.8804301  | 0.6398083  |
| C | -1.3680977 | 1.7629281  | -0.1674097 |
| C | -0.4655257 | 0.6930551  | -0.0109567 |
| C | -1.1896537 | -0.8516199 | -1.5920757 |
| C | 0.1955803  | -1.1042499 | -1.9956537 |
| N | 1.1996813  | -0.3783279 | -1.4717827 |
| C | 0.8991263  | 0.7949871  | -0.6593907 |
| C | -2.4092817 | -1.1915779 | -1.7660527 |
| N | 2.8643903  | 1.9517871  | 0.3959613  |
| C | 1.9767323  | 0.9234441  | 0.4437623  |
| O | 2.0387573  | 0.0716621  | 1.3132143  |
| O | 0.3009903  | -1.9979299 | -2.8269297 |



|    |            |            |            |
|----|------------|------------|------------|
| O  | -3.7227057 | 1.0499021  | 2.5209853  |
| H  | 0.9045493  | 1.6817101  | -1.3090887 |
| Au | -4.1035087 | -0.7505169 | -0.5635647 |
| C  | -2.8323677 | -2.1345689 | -2.8826147 |
| C  | 2.9227573  | 3.2548511  | -0.3118807 |
| C  | 1.6721353  | 4.0825321  | -0.0280327 |
| C  | 3.1524513  | 3.0972161  | -1.8133567 |
| C  | 4.1352033  | 3.9674471  | 0.2825813  |
| C  | 5.5151663  | -1.4133339 | 0.2481613  |
| C  | 5.1336543  | -2.6495159 | 0.7775463  |
| C  | 3.9208403  | -3.2245419 | 0.3882313  |
| C  | 3.1052603  | -2.5549349 | -0.5155107 |
| C  | 3.4676683  | -1.3155379 | -1.0352497 |
| C  | 4.6868173  | -0.7583479 | -0.6464227 |
| C  | 2.5591853  | -0.6020629 | -1.9953397 |
| O  | 6.0014133  | -3.2078519 | 1.6485203  |
| C  | 5.6733203  | -4.4611209 | 2.2012113  |
| H  | -3.1764057 | 2.7073911  | 0.5112843  |
| H  | -1.1889047 | 2.5033941  | -0.9452247 |
| H  | 3.5219843  | 1.8529541  | 1.1639643  |
| H  | -4.1028697 | 1.9354511  | 2.4676473  |
| H  | -1.9674717 | -2.4479449 | -3.4731267 |
| H  | -3.3209277 | -3.0159369 | -2.4538247 |
| H  | -3.5695407 | -1.6391599 | -3.5229647 |
| H  | 1.5229523  | 4.1965231  | 1.0517113  |

|   |            |            |            |
|---|------------|------------|------------|
| H | 1.7728453  | 5.0811601  | -0.4690607 |
| H | 0.7682913  | 3.6281071  | -0.4508417 |
| H | 4.0515553  | 2.5004221  | -2.0084437 |
| H | 3.3024953  | 4.0850901  | -2.2642177 |
| H | 2.3089343  | 2.6337521  | -2.3377247 |
| H | 4.2649973  | 4.9489841  | -0.1843907 |
| H | 4.0130503  | 4.1213101  | 1.3617703  |
| H | 5.0503893  | 3.3869941  | 0.1115773  |
| H | 6.4680893  | -0.9934199 | 0.5591613  |
| H | 3.6102323  | -4.1892389 | 0.7778383  |
| H | 2.1636783  | -3.0102439 | -0.8230927 |
| H | 4.9909583  | 0.2092721  | -1.0473097 |
| H | 2.4236763  | -1.1783719 | -2.9179357 |
| H | 2.9789963  | 0.3724581  | -2.2759667 |
| H | 6.4966603  | -4.7320919 | 2.8643203  |
| H | 5.5710113  | -5.2317219 | 1.4243193  |
| H | 4.7433013  | -4.4149509 | 2.7852453  |
| P | -6.1650157 | -0.6612769 | 0.6002043  |
| C | -6.9097457 | 0.9979551  | 0.7559693  |
| H | -7.0924527 | 1.4137021  | -0.2395437 |
| H | -7.8574887 | 0.9418871  | 1.3039853  |
| H | -6.2266757 | 1.6639231  | 1.2903243  |
| C | -6.0878787 | -1.3148529 | 2.2993973  |
| H | -7.0766007 | -1.2677809 | 2.7707803  |
| H | -5.7526817 | -2.3563189 | 2.2710213  |

|   |            |            |            |
|---|------------|------------|------------|
| H | -5.3695827 | -0.7299709 | 2.8817563  |
| C | -7.4661557 | -1.6490879 | -0.2108517 |
| H | -8.3993357 | -1.5954859 | 0.3620143  |
| H | -7.6415417 | -1.2739289 | -1.2236617 |
| H | -7.1458257 | -2.6931649 | -0.2790667 |
| H | 0.0022083  | -1.0604529 | 1.1551303  |
| H | -2.0272117 | -0.8663449 | 2.6105963  |

Zero-point correction= 0.593319 (Hartree/Particle)

Thermal correction to Energy= 0.632826

Thermal correction to Enthalpy= 0.633770

Thermal correction to Gibbs Free Energy= 0.519166

Sum of electronic and zero-point Energies= -1936.523772

Sum of electronic and thermal Energies= -1936.484265

Sum of electronic and thermal Enthalpies= -1936.483321

Sum of electronic and thermal Free Energies= -1936.597925

### **D-int1**

|   |            |            |            |
|---|------------|------------|------------|
| C | -1.0745047 | -1.2994193 | 1.6349170  |
| C | -0.3406287 | -1.0068513 | 0.5101500  |
| C | -1.8832467 | -0.3026243 | 2.1772360  |
| C | -2.0397167 | 0.9783537  | 1.5489810  |
| C | -1.4425427 | 1.2079367  | 0.3621670  |
| C | -0.5633267 | 0.2206357  | -0.2845240 |
| C | -1.0853397 | -0.3079003 | -1.6649130 |
| C | 0.1498263  | -0.5533883 | -2.4692120 |
| N | 1.2135863  | 0.0346807  | -1.8085080 |

|    |            |            |            |
|----|------------|------------|------------|
| C  | 0.7828343  | 0.8673627  | -0.7111330 |
| C  | -2.3610127 | -0.5963613 | -1.9857570 |
| N  | 2.6145673  | 1.8739577  | 0.6582750  |
| C  | 1.7310003  | 0.8669777  | 0.4894410  |
| O  | 1.6770483  | -0.0736123 | 1.2799950  |
| O  | 0.2622653  | -1.1946883 | -3.4957940 |
| O  | -2.5257307 | -0.5810343 | 3.2975660  |
| H  | 0.5825543  | 1.8961037  | -1.0535130 |
| Au | -4.0245357 | -0.4996713 | -0.7337150 |
| C  | -2.7114257 | -1.0965503 | -3.3572850 |
| C  | 2.6843263  | 3.2710377  | 0.1480310  |
| C  | 1.4293163  | 4.0415617  | 0.5515480  |
| C  | 2.9137613  | 3.3400057  | -1.3580020 |
| C  | 3.8952103  | 3.8809127  | 0.8487000  |
| C  | 5.2569943  | -1.2579813 | 0.1856410  |
| C  | 4.8659533  | -2.5776983 | 0.4309520  |
| C  | 3.7559263  | -3.1053723 | -0.2352080 |
| C  | 3.0482473  | -2.3038413 | -1.1236900 |
| C  | 3.4148693  | -0.9801713 | -1.3595040 |
| C  | 4.5376533  | -0.4751393 | -0.7010990 |
| C  | 2.5869313  | -0.1272353 | -2.2802150 |
| O  | 5.6237863  | -3.2593943 | 1.3158840  |
| C  | 5.2997153  | -4.6067503 | 1.5696820  |
| H  | -2.6882617 | 1.7213557  | 2.0118300  |
| H  | -1.6146267 | 2.1429767  | -0.1702780 |

|   |            |            |            |
|---|------------|------------|------------|
| H | 3.1956383  | 1.6883867  | 1.4708690  |
| H | -3.0184347 | 0.1838047  | 3.6271270  |
| H | -1.8670317 | -1.1328693 | -4.0488130 |
| H | -3.1335267 | -2.1073573 | -3.2731130 |
| H | -3.5119757 | -0.4786373 | -3.7830270 |
| H | 1.2763083  | 3.9900797  | 1.6357780  |
| H | 1.5276263  | 5.0961167  | 0.2692520  |
| H | 0.5288913  | 3.6560787  | 0.0569430  |
| H | 3.8314653  | 2.8095357  | -1.6379370 |
| H | 3.0323253  | 4.3885977  | -1.6539190 |
| H | 2.0841333  | 2.9331937  | -1.9464760 |
| H | 4.0327913  | 4.9186337  | 0.5289740  |
| H | 3.7663623  | 3.8806917  | 1.9383000  |
| H | 4.8087533  | 3.3259767  | 0.6022700  |
| H | 6.1350573  | -0.8792283 | 0.7022720  |
| H | 3.4495563  | -4.1355213 | -0.0795170 |
| H | 2.1943963  | -2.7223373 | -1.6593630 |
| H | 4.8520253  | 0.5532187  | -0.8834190 |
| H | 2.4787413  | -0.5909593 | -3.2688350 |
| H | 3.0520753  | 0.8550877  | -2.4278100 |
| H | 6.0316453  | -4.9700913 | 2.2929530  |
| H | 5.3639963  | -5.2167483 | 0.6579890  |
| H | 4.2925033  | -4.7071033 | 1.9983600  |
| P | -6.0588707 | -0.5443683 | 0.5299510  |
| C | -5.8899887 | -0.1323803 | 2.3061180  |

|   |            |            |            |
|---|------------|------------|------------|
| H | -5.5019577 | 0.8877177  | 2.4077950  |
| H | -6.8578467 | -0.1941793 | 2.8172120  |
| H | -5.1936527 | -0.8378093 | 2.7729500  |
| C | -6.8725957 | -2.1785263 | 0.5497730  |
| H | -7.7999387 | -2.1431153 | 1.1333350  |
| H | -7.1030037 | -2.4844593 | -0.4752720 |
| H | -6.1973387 | -2.9216893 | 0.9847790  |
| C | -7.3618997 | 0.5923057  | -0.0566590 |
| H | -8.2653037 | 0.4952997  | 0.5567180  |
| H | -7.0026947 | 1.6249847  | -0.0133990 |
| H | -7.6068007 | 0.3594347  | -1.0974720 |
| H | 0.3241473  | -1.7526123 | 0.0813090  |
| H | -0.9870527 | -2.2473263 | 2.1553570  |

Zero-point correction= 0.595114 (Hartree/Particle)

Thermal correction to Energy= 0.633611

Thermal correction to Enthalpy= 0.634555

Thermal correction to Gibbs Free Energy= 0.522441

Sum of electronic and zero-point Energies= -1936.544046

Sum of electronic and thermal Energies= -1936.505548

Sum of electronic and thermal Enthalpies= -1936.504604

Sum of electronic and thermal Free Energies= -1936.616718

### **D-ts2**

|   |           |            |            |
|---|-----------|------------|------------|
| C | 1.9231260 | 0.5389219  | -1.6541154 |
| C | 0.7979750 | -0.0517901 | -1.2179974 |
| C | 2.5524830 | 1.5532359  | -0.8382754 |

|    |            |            |            |
|----|------------|------------|------------|
| C  | 1.9398070  | 2.0817359  | 0.2739186  |
| C  | 0.6558900  | 1.6166539  | 0.6249106  |
| C  | 0.1455610  | 0.3260229  | 0.0577646  |
| C  | 0.3131120  | -0.7101271 | 1.2112976  |
| C  | -0.9848650 | -0.6868721 | 1.9426646  |
| N  | -1.8752270 | 0.1325249  | 1.2437346  |
| C  | -1.3841070 | 0.4081039  | -0.0894294 |
| C  | 1.4161490  | -1.4297161 | 1.5064306  |
| N  | -0.7607950 | 2.7801849  | -0.3438434 |
| C  | -1.8244870 | 1.8063019  | -0.4802044 |
| O  | -2.9557700 | 2.0886199  | -0.7712384 |
| O  | -1.2864400 | -1.2540601 | 2.9738186  |
| O  | 3.7641360  | 1.9142269  | -1.2513664 |
| Au | 3.2427530  | -1.4306911 | 0.4908176  |
| C  | 1.4365550  | -2.3750621 | 2.6725756  |
| C  | -5.1512780 | -1.8680071 | -1.2894324 |
| C  | -5.0087450 | -3.1991481 | -0.8835554 |
| C  | -4.3216340 | -3.4927581 | 0.2971956  |
| C  | -3.7881680 | -2.4565631 | 1.0569606  |
| C  | -3.9269460 | -1.1252181 | 0.6639786  |
| C  | -4.6164150 | -0.8474361 | -0.5222534 |
| C  | -3.3190530 | -0.0232561 | 1.4856606  |
| O  | -5.5676000 | -4.1226091 | -1.6947914 |
| C  | -5.4938710 | -5.4762381 | -1.3104344 |
| H  | 2.4348800  | 2.8465119  | 0.8682216  |

|   |            |            |            |
|---|------------|------------|------------|
| H | 4.1372960  | 2.5961879  | -0.6750464 |
| H | 0.5015220  | -2.4167681 | 3.2340706  |
| H | 1.6959130  | -3.3820161 | 2.3204266  |
| H | 2.2502720  | -2.0888401 | 3.3524246  |
| H | -5.6975310 | -1.6665101 | -2.2072604 |
| H | -4.2079970 | -4.5175491 | 0.6379196  |
| H | -3.2601650 | -2.6850571 | 1.9819946  |
| H | -4.7361230 | 0.1876399  | -0.8402214 |
| H | -3.4015740 | -0.2319221 | 2.5572736  |
| H | -3.8113250 | 0.9354549  | 1.2858666  |
| H | -6.0145950 | -6.0457251 | -2.0821324 |
| H | -5.9862310 | -5.6491271 | -0.3435194 |
| H | -4.4530270 | -5.8243581 | -1.2493334 |
| P | 5.3952730  | -1.5893781 | -0.5468644 |
| C | 5.4478740  | -1.1166441 | -2.3116664 |
| H | 5.1360160  | -0.0716911 | -2.4155114 |
| H | 6.4607260  | -1.2331471 | -2.7146174 |
| H | 4.7604740  | -1.7486461 | -2.8832324 |
| C | 6.1129070  | -3.2679901 | -0.5174804 |
| H | 7.0970520  | -3.2772071 | -1.0003494 |
| H | 6.2152380  | -3.6052071 | 0.5185206  |
| H | 5.4474880  | -3.9623281 | -1.0395104 |
| C | 6.6901210  | -0.5462611 | 0.2114496  |
| H | 7.6505980  | -0.6884901 | -0.2975534 |
| H | 6.3985640  | 0.5063959  | 0.1407606  |



|   |            |            |            |
|---|------------|------------|------------|
| H | 6.7999700  | -0.8034431 | 1.2692736  |
| H | -1.7810650 | -0.3167541 | -0.8235934 |
| H | 0.2634220  | 1.8757129  | 1.6065786  |
| H | -0.2337260 | 2.8242059  | -1.2212304 |
| C | -1.1310650 | 4.1785319  | 0.0940806  |
| C | -2.0194580 | 4.0876679  | 1.3270676  |
| C | 0.1723980  | 4.8850249  | 0.4431866  |
| C | -1.8244250 | 4.9152649  | -1.0472674 |
| H | -3.0184070 | 3.7115579  | 1.0901856  |
| H | -1.5746700 | 3.4438359  | 2.0970186  |
| H | -2.1338370 | 5.0880689  | 1.7575006  |
| H | 0.8813760  | 4.8667209  | -0.3952694 |
| H | -0.0383550 | 5.9349559  | 0.6730256  |
| H | 0.6521440  | 4.4438909  | 1.3248236  |
| H | -2.0659130 | 5.9348039  | -0.7251624 |
| H | -1.1656120 | 4.9946749  | -1.9221994 |
| H | -2.7503550 | 4.4180989  | -1.3446114 |
| H | 2.4282960  | 0.2384579  | -2.5685004 |
| H | 0.3534880  | -0.8755881 | -1.7743284 |

Zero-point correction= 0.595198 (Hartree/Particle)

Thermal correction to Energy= 0.633321

Thermal correction to Enthalpy= 0.634265

Thermal correction to Gibbs Free Energy= 0.523204

Sum of electronic and zero-point Energies= -1936.526509

Sum of electronic and thermal Energies= -1936.488387

Sum of electronic and thermal Enthalpies= -1936.487443

Sum of electronic and thermal Free Energies= -1936.598503

**D-int2**

|    |            |            |            |
|----|------------|------------|------------|
| C  | -1.8300818 | 0.3029730  | 1.8816629  |
| C  | -0.7539968 | -0.2346110 | 1.2974579  |
| C  | -2.5053338 | 1.4378920  | 1.2662239  |
| C  | -1.9571808 | 2.1322260  | 0.2463349  |
| C  | -0.5945388 | 1.7875420  | -0.2326821 |
| C  | -0.1308728 | 0.3301840  | 0.0612049  |
| C  | -0.2403708 | -0.5249260 | -1.2000481 |
| C  | 1.0615512  | -0.3897870 | -1.9036701 |
| N  | 1.9246692  | 0.3624260  | -1.0791021 |
| C  | 1.3902622  | 0.4440690  | 0.2563359  |
| C  | -1.3151028 | -1.2418140 | -1.6039881 |
| N  | 0.4663432  | 2.7111910  | 0.4354859  |
| C  | 1.6454072  | 1.8054870  | 0.8246139  |
| O  | 2.5395202  | 2.2187440  | 1.4892249  |
| O  | 1.4208582  | -0.8089760 | -2.9851151 |
| O  | -3.7192428 | 1.6817780  | 1.7929739  |
| Au | -3.1120498 | -1.4140370 | -0.5608751 |
| C  | -1.3076818 | -2.0043890 | -2.8943921 |
| C  | 5.0825482  | -1.8380430 | 1.4066339  |
| C  | 5.0110062  | -3.1193070 | 0.8486349  |
| C  | 4.4159162  | -3.2973360 | -0.4035271 |
| C  | 3.9025202  | -2.1976220 | -1.0830271 |

|   |            |            |            |
|---|------------|------------|------------|
| C | 3.9738162  | -0.9152260 | -0.5394891 |
| C | 4.5699802  | -0.7531980 | 0.7166639  |
| C | 3.3784202  | 0.2541920  | -1.2690051 |
| O | 5.5414622  | -4.1118920 | 1.5923659  |
| C | 5.5320442  | -5.4186950 | 1.0632389  |
| H | -2.5115528 | 2.9261780  | -0.2493391 |
| H | -4.1240218 | 2.4447150  | 1.3604939  |
| H | -0.3776248 | -1.9256540 | -3.4612851 |
| H | -1.5196638 | -3.0624310 | -2.6915821 |
| H | -2.1411518 | -1.6608630 | -3.5215571 |
| H | 5.5562002  | -1.7262140 | 2.3783679  |
| H | 4.3566902  | -4.2812810 | -0.8588891 |
| H | 3.4414522  | -2.3351780 | -2.0604311 |
| H | 4.6383082  | 0.2432700  | 1.1553659  |
| H | 3.5190492  | 0.1695150  | -2.3517601 |
| H | 3.8455352  | 1.1929310  | -0.9397201 |
| H | 6.0164082  | -6.0555480 | 1.8052059  |
| H | 6.0927542  | -5.4763680 | 0.1202569  |
| H | 4.5078542  | -5.7798680 | 0.8947459  |
| P | -5.2395148 | -1.7156500 | 0.4940689  |
| C | -5.2213598 | -1.7565220 | 2.3212659  |
| H | -4.8748408 | -0.7885970 | 2.6978299  |
| H | -6.2256428 | -1.9547830 | 2.7138629  |
| H | -4.5376778 | -2.5368120 | 2.6698709  |
| C | -6.0922758 | -3.2621490 | 0.0281239  |

|   |            |            |            |
|---|------------|------------|------------|
| H | -7.0653328 | -3.3352570 | 0.5278109  |
| H | -6.2390218 | -3.2876760 | -1.0559951 |
| H | -5.4756818 | -4.1210450 | 0.3101639  |
| C | -6.4627888 | -0.4100300 | 0.1200279  |
| H | -7.4185158 | -0.6168620 | 0.6156839  |
| H | -6.0738388 | 0.5505800  | 0.4723679  |
| H | -6.6206468 | -0.3479490 | -0.9608841 |
| H | 1.8231452  | -0.3140580 | 0.9313509  |
| H | -0.4838608 | 1.9694600  | -1.3062161 |
| H | 0.0571482  | 3.0274360  | 1.3252719  |
| C | 0.8754892  | 4.0209070  | -0.3248041 |
| C | 1.7842182  | 3.6561270  | -1.4832921 |
| C | -0.3970848 | 4.6956860  | -0.8120671 |
| C | 1.5772852  | 4.9270850  | 0.6764109  |
| H | 2.7439402  | 3.2522230  | -1.1438381 |
| H | 1.3284542  | 2.9415420  | -2.1768051 |
| H | 1.9989642  | 4.5716450  | -2.0446331 |
| H | -1.0864148 | 4.9121560  | 0.0124649  |
| H | -0.1148388 | 5.6534090  | -1.2621211 |
| H | -0.9213868 | 4.1215230  | -1.5826011 |
| H | 1.8230952  | 5.8674500  | 0.1716179  |
| H | 0.9224572  | 5.1736760  | 1.5223409  |
| H | 2.5029342  | 4.4964740  | 1.0624959  |
| H | -2.2798948 | -0.1258680 | 2.7739529  |
| H | -0.2966188 | -1.1361710 | 1.7022679  |

Zero-point correction= 0.596877 (Hartree/Particle)

Thermal correction to Energy= 0.634479

Thermal correction to Enthalpy= 0.635423

Thermal correction to Gibbs Free Energy= 0.526122

Sum of electronic and zero-point Energies= -1936.539417

Sum of electronic and thermal Energies= -1936.501816

Sum of electronic and thermal Enthalpies= -1936.500872

Sum of electronic and thermal Free Energies= -1936.610173

### **D-ts3**

|   |            |            |            |
|---|------------|------------|------------|
| C | -1.3987098 | -0.3769082 | 2.1065010  |
| C | -0.5065538 | -0.7257932 | 1.1586410  |
| C | -2.1282048 | 0.8442368  | 1.9700550  |
| C | -1.8567188 | 1.7840298  | 0.9734120  |
| C | -0.8209288 | 1.4839308  | -0.1004540 |
| C | -0.1040118 | 0.1079058  | -0.0060350 |
| C | -0.1721028 | -0.6550902 | -1.3211210 |
| C | 1.1307992  | -0.4571902 | -2.0114190 |
| N | 1.9309962  | 0.3373998  | -1.1864460 |
| C | 1.3949512  | 0.4587558  | 0.1472370  |
| C | -1.2563108 | -1.3285982 | -1.7658100 |
| N | 0.1890492  | 2.5467258  | 0.2914200  |
| C | 1.4653732  | 1.9124378  | 0.5551450  |
| O | 2.4295302  | 2.4846268  | 0.9829940  |
| O | 1.5031632  | -0.8662122 | -3.0930500 |
| O | -3.0605618 | 1.0369568  | 2.8878700  |

|    |            |            |            |
|----|------------|------------|------------|
| Au | -3.0327748 | -1.4743542 | -0.6896630 |
| C  | -1.2689268 | -2.0239252 | -3.0915690 |
| C  | 5.3857452  | -1.2811842 | 1.3423570  |
| C  | 5.4707052  | -2.5917142 | 0.8597530  |
| C  | 4.8794222  | -2.9195172 | -0.3635050 |
| C  | 4.2154422  | -1.9362702 | -1.0900350 |
| C  | 4.1318012  | -0.6254562 | -0.6228750 |
| C  | 4.7245452  | -0.3130922 | 0.6059950  |
| C  | 3.3802042  | 0.4136448  | -1.4045880 |
| O  | 6.1405682  | -3.4627862 | 1.6441220  |
| C  | 6.3013852  | -4.7847632 | 1.1830310  |
| H  | -2.6577288 | 2.4793258  | 0.7127980  |
| H  | -3.5124418 | 1.8847428  | 2.7633540  |
| H  | -0.3331488 | -1.9290592 | -3.6475880 |
| H  | -1.4926728 | -3.0887842 | -2.9439220 |
| H  | -2.0944048 | -1.6362152 | -3.7031080 |
| H  | 5.8598442  | -1.0518682 | 2.2931310  |
| H  | 4.9405192  | -3.9280722 | -0.7613010 |
| H  | 3.7602042  | -2.1896052 | -2.0471170 |
| H  | 4.6675302  | 0.7085918  | 0.9829560  |
| H  | 3.5121402  | 0.2805308  | -2.4836920 |
| H  | 3.7220102  | 1.4222168  | -1.1386310 |
| H  | 6.8844122  | -5.3083372 | 1.9425360  |
| H  | 6.8448862  | -4.8163852 | 0.2287050  |
| H  | 5.3340662  | -5.2924002 | 1.0611980  |

|   |            |            |            |
|---|------------|------------|------------|
| P | -5.1218618 | -1.7097982 | 0.4717280  |
| C | -4.9695678 | -2.0623532 | 2.2594470  |
| H | -4.4603228 | -1.2278632 | 2.7548840  |
| H | -5.9577718 | -2.1988822 | 2.7141840  |
| H | -4.3771578 | -2.9705962 | 2.4084110  |
| C | -6.2031618 | -3.0413542 | -0.1528720 |
| H | -7.1368208 | -3.0834092 | 0.4200410  |
| H | -6.4334868 | -2.8638892 | -1.2077750 |
| H | -5.6865628 | -4.0026132 | -0.0723230 |
| C | -6.1851838 | -0.2223292 | 0.4280060  |
| H | -7.1183278 | -0.3904102 | 0.9782600  |
| H | -5.6484328 | 0.6194498  | 0.8789340  |
| H | -6.4185368 | 0.0360608  | -0.6093370 |
| H | 1.9494272  | -0.1659142 | 0.8677540  |
| H | -1.1869628 | 1.6332268  | -1.1203400 |
| H | -0.7483968 | 2.5607478  | 1.2983710  |
| C | 0.2182662  | 3.8740888  | -0.4789920 |
| C | 0.9303002  | 3.6415778  | -1.8040590 |
| C | -1.2095998 | 4.3497608  | -0.7203080 |
| C | 0.9347172  | 4.9161598  | 0.3708440  |
| H | 1.9752772  | 3.3485978  | -1.6563520 |
| H | 0.4359822  | 2.8724618  | -2.4102850 |
| H | 0.9273752  | 4.5728368  | -2.3811950 |
| H | -1.7311548 | 4.5695508  | 0.2188200  |
| H | -1.1589088 | 5.2874258  | -1.2832770 |

|   |            |            |            |
|---|------------|------------|------------|
| H | -1.8092978 | 3.6554828  | -1.3195320 |
| H | 0.8648722  | 5.8839348  | -0.1381260 |
| H | 0.4555832  | 5.0161698  | 1.3523520  |
| H | 1.9881792  | 4.6805508  | 0.5242680  |
| H | -1.6339678 | -1.0199492 | 2.9501320  |
| H | 0.0124152  | -1.6812002 | 1.2370580  |

Zero-point correction= 0.591554 (Hartree/Particle)

Thermal correction to Energy= 0.629778

Thermal correction to Enthalpy= 0.630722

Thermal correction to Gibbs Free Energy= 0.517809

Sum of electronic and zero-point Energies= -1936.500774

Sum of electronic and thermal Energies= -1936.462551

Sum of electronic and thermal Enthalpies= -1936.461607

Sum of electronic and thermal Free Energies= -1936.574520

### **D-int3**

|   |            |            |            |
|---|------------|------------|------------|
| C | -0.3490607 | -1.8935325 | 1.3879134  |
| C | 0.4949963  | -1.3702485 | 0.4326084  |
| C | -1.1587637 | -1.0037745 | 2.0841294  |
| C | -1.0256157 | 0.4685515  | 1.9484124  |
| C | -0.6907737 | 0.8998865  | 0.5137634  |
| C | 0.3281623  | -0.0410605 | -0.1411146 |
| C | -0.0037677 | -0.4776175 | -1.5851376 |
| C | 1.2685673  | -0.2951605 | -2.3676136 |
| N | 2.1252553  | 0.4426725  | -1.5888846 |
| C | 1.6212493  | 0.7556935  | -0.2818906 |



|    |            |            |            |
|----|------------|------------|------------|
| C  | -1.1975977 | -0.9406745 | -2.0186256 |
| N  | -0.1022047 | 2.2278805  | 0.4097784  |
| C  | 1.1607113  | 2.2047915  | -0.1508046 |
| O  | 1.8249883  | 3.1492295  | -0.5182096 |
| O  | 1.5227923  | -0.7045685 | -3.4844206 |
| O  | -2.0112827 | -1.3911155 | 3.0045604  |
| Au | -2.9381347 | -1.1729065 | -0.8692366 |
| C  | -1.4307967 | -1.2351295 | -3.4684936 |
| C  | 5.9833723  | -0.2315805 | 0.7785744  |
| C  | 6.1113043  | -1.6095425 | 0.5758304  |
| C  | 5.3976423  | -2.2282425 | -0.4553896 |
| C  | 4.5735273  | -1.4607875 | -1.2726526 |
| C  | 4.4493203  | -0.0845415 | -1.0885616 |
| C  | 5.1604963  | 0.5175245  | -0.0463846 |
| C  | 3.5130683  | 0.7100065  | -1.9537346 |
| O  | 6.9409293  | -2.2532495 | 1.4254094  |
| C  | 7.1685073  | -3.6280185 | 1.2188554  |
| H  | -1.9369677 | 0.9445145  | 2.3243144  |
| H  | -0.5318957 | -1.1340805 | -4.0821816 |
| H  | -1.8383417 | -2.2476555 | -3.5841146 |
| H  | -2.2095587 | -0.5622485 | -3.8544246 |
| H  | 6.5520153  | 0.2240265  | 1.5850034  |
| H  | 5.4918283  | -3.2947315 | -0.6380596 |
| H  | 4.0277593  | -1.9381395 | -2.0879296 |
| H  | 5.0687763  | 1.5930705  | 0.1097824  |

|   |            |            |            |
|---|------------|------------|------------|
| H | 3.5971913  | 0.4340975  | -3.0108256 |
| H | 3.6958343  | 1.7871145  | -1.8606966 |
| H | 7.8866733  | -3.9405805 | 1.9787574  |
| H | 7.5916783  | -3.8225545 | 0.2237304  |
| H | 6.2461663  | -4.2149915 | 1.3361294  |
| P | -5.0477147 | -1.3867835 | 0.2572524  |
| C | -5.4081747 | -3.0296555 | 0.9714544  |
| H | -4.6594277 | -3.2796195 | 1.7298624  |
| H | -6.4016427 | -3.0386615 | 1.4348254  |
| H | -5.3700877 | -3.7912525 | 0.1867634  |
| C | -6.4768537 | -1.0555075 | -0.8280966 |
| H | -7.4152907 | -1.1469375 | -0.2688886 |
| H | -6.3991677 | -0.0452355 | -1.2413556 |
| H | -6.4813907 | -1.7669975 | -1.6595096 |
| C | -5.2804227 | -0.2392795 | 1.6608784  |
| H | -6.2685227 | -0.3782615 | 2.1150924  |
| H | -4.5092207 | -0.4177025 | 2.4182604  |
| H | -5.1932627 | 0.7938775  | 1.3088094  |
| H | 2.3759553  | 0.5296855  | 0.4900374  |
| H | -1.6213117 | 0.8559865  | -0.0686166 |
| C | -0.9704627 | 3.4476505  | 0.2840244  |
| C | -1.2734577 | 3.6579735  | -1.1973436 |
| C | -2.2745857 | 3.2498275  | 1.0515664  |
| C | -0.2559207 | 4.6538715  | 0.8866444  |
| H | -0.3543147 | 3.8462165  | -1.7605926 |

|   |            |            |            |
|---|------------|------------|------------|
| H | -1.7726297 | 2.7763485  | -1.6254126 |
| H | -1.9372187 | 4.5198525  | -1.3315036 |
| H | -2.0973847 | 3.1255585  | 2.1271964  |
| H | -2.8827357 | 4.1522675  | 0.9286344  |
| H | -2.8749197 | 2.4095835  | 0.6761014  |
| H | -0.9269317 | 5.5199085  | 0.8514184  |
| H | -0.0017147 | 4.4633135  | 1.9361574  |
| H | 0.6589643  | 4.8968235  | 0.3453284  |
| H | -0.2107497 | 0.7765355  | 2.6243904  |
| H | -2.0062087 | -2.3557035 | 3.1144374  |
| H | 1.3037033  | -1.9733285 | 0.0148104  |
| H | -0.3449477 | -2.9526815 | 1.6392084  |

Zero-point correction= 0.597809 (Hartree/Particle)

Thermal correction to Energy= 0.635854

Thermal correction to Enthalpy= 0.636798

Thermal correction to Gibbs Free Energy= 0.526165

Sum of electronic and zero-point Energies= -1936.553567

Sum of electronic and thermal Energies= -1936.515522

Sum of electronic and thermal Enthalpies= -1936.514578

Sum of electronic and thermal Free Energies= -1936.625211

#### **D-ts4**

|   |            |            |           |
|---|------------|------------|-----------|
| C | 0.5349400  | -1.3433934 | 2.9164255 |
| C | 1.1688640  | -1.1216024 | 1.7599995 |
| C | -0.7709620 | -0.7199654 | 2.8569735 |
| C | -0.8110010 | 0.7239716  | 2.5923145 |

|    |            |            |            |
|----|------------|------------|------------|
| C  | -0.5877090 | 0.6656096  | 1.0166635  |
| C  | 0.4729420  | -0.3955564 | 0.6346465  |
| C  | -0.0459880 | -1.5442624 | -0.2290465 |
| C  | 0.9770370  | -1.7091754 | -1.3213325 |
| N  | 1.7057820  | -0.5377344 | -1.3571395 |
| C  | 1.4953640  | 0.3241196  | -0.2242965 |
| C  | -1.1501470 | -2.3130034 | -0.0377335 |
| N  | -0.1855990 | 1.8876156  | 0.3531945  |
| C  | 0.8712850  | 1.6708946  | -0.5298055 |
| O  | 1.2487150  | 2.4178236  | -1.4049635 |
| O  | 1.1070400  | -2.6427934 | -2.0876375 |
| O  | -1.8112980 | -1.4144764 | 2.5928965  |
| Au | -3.1276570 | -1.4034704 | -0.0345955 |
| C  | -1.2983790 | -3.6138654 | -0.7906045 |
| C  | 6.0028980  | 0.6315886  | -0.3442775 |
| C  | 6.4723690  | -0.6129734 | 0.0894635  |
| C  | 5.7690130  | -1.7743654 | -0.2446675 |
| C  | 4.6123660  | -1.6770934 | -1.0123985 |
| C  | 4.1431720  | -0.4433344 | -1.4604605 |
| C  | 4.8510500  | 0.7104726  | -1.1087515 |
| C  | 2.8605430  | -0.3569454 | -2.2371715 |
| O  | 7.6044370  | -0.5886454 | 0.8241705  |
| C  | 8.1553850  | -1.8172174 | 1.2398495  |
| H  | -1.7888360 | 1.1577716  | 2.8065865  |
| H  | -0.3529150 | -4.1603334 | -0.8583125 |

|   |            |            |            |
|---|------------|------------|------------|
| H | -2.0546290 | -4.2552994 | -0.3270215 |
| H | -1.6146610 | -3.4327034 | -1.8280795 |
| H | 6.5699860  | 1.5177796  | -0.0717095 |
| H | 6.1214470  | -2.7514534 | 0.0724005  |
| H | 4.0708640  | -2.5835884 | -1.2858415 |
| H | 4.4880430  | 1.6819786  | -1.4461865 |
| H | 2.7830730  | -1.1490514 | -2.9900945 |
| H | 2.7643790  | 0.6135736  | -2.7377515 |
| H | 9.0676300  | -1.5771234 | 1.7884105  |
| H | 8.4097550  | -2.4564144 | 0.3832065  |
| H | 7.4719140  | -2.3642444 | 1.9047815  |
| P | -5.2853910 | -0.5515264 | -0.4656935 |
| C | -6.2257700 | -0.1357454 | 1.0401095  |
| H | -5.6893970 | 0.6303346  | 1.6091615  |
| H | -7.2210200 | 0.2406646  | 0.7763265  |
| H | -6.3301830 | -1.0248264 | 1.6690805  |
| C | -6.3523820 | -1.7109624 | -1.3804995 |
| H | -7.3406890 | -1.2664714 | -1.5460275 |
| H | -5.8969600 | -1.9492534 | -2.3464315 |
| H | -6.4642250 | -2.6389374 | -0.8117045 |
| C | -5.3080300 | 0.9804416  | -1.4545855 |
| H | -6.3415000 | 1.3011426  | -1.6305365 |
| H | -4.7699680 | 1.7733346  | -0.9235315 |
| H | -4.8131190 | 0.8108336  | -2.4160615 |
| H | 2.4499900  | 0.5019196  | 0.3024105  |

|   |            |            |            |
|---|------------|------------|------------|
| H | -1.5635100 | 0.3418586  | 0.6232755  |
| C | -1.1848350 | 2.9687016  | 0.0377475  |
| C | -1.8088640 | 2.6648396  | -1.3238805 |
| C | -2.2860950 | 3.0118516  | 1.0918425  |
| C | -0.4793590 | 4.3217136  | 0.0427635  |
| H | -1.0626410 | 2.7062516  | -2.1214885 |
| H | -2.2676290 | 1.6632526  | -1.3268395 |
| H | -2.5909560 | 3.3998826  | -1.5506975 |
| H | -1.8927450 | 3.2437896  | 2.0886385  |
| H | -2.9766400 | 3.8196976  | 0.8255535  |
| H | -2.8775200 | 2.0857396  | 1.1355915  |
| H | -1.2148720 | 5.1118706  | -0.1476365 |
| H | -0.0236770 | 4.5105056  | 1.0216815  |
| H | 0.2958140  | 4.3765246  | -0.7226115 |
| H | -0.0047420 | 1.2733986  | 3.0839685  |
| H | -1.6379550 | -2.0763544 | 1.7507815  |
| H | 2.1235850  | -1.5912414 | 1.5133555  |
| H | 0.8407760  | -2.0363444 | 3.6938315  |

Zero-point correction= 0.592145 (Hartree/Particle)

Thermal correction to Energy= 0.629595

Thermal correction to Enthalpy= 0.630539

Thermal correction to Gibbs Free Energy= 0.521649

Sum of electronic and zero-point Energies= -1936.496502

Sum of electronic and thermal Energies= -1936.459051

Sum of electronic and thermal Enthalpies= -1936.458107

Sum of electronic and thermal Free Energies= -1936.566997

**D-2**

|    |            |            |            |
|----|------------|------------|------------|
| C  | 0.2149649  | -1.5387442 | 1.9062547  |
| C  | -0.9047991 | -0.8227412 | 1.6738747  |
| C  | 1.4448919  | -1.1873002 | 1.2464357  |
| C  | 1.3812409  | -0.1614522 | 0.1595057  |
| C  | 0.3951009  | 0.9813448  | 0.4268847  |
| C  | -0.9602031 | 0.4657498  | 0.9332537  |
| C  | -1.7255641 | 1.4488828  | 1.8144167  |
| C  | -3.1338791 | 1.5087378  | 1.3139857  |
| N  | -3.1433831 | 0.8514248  | 0.1091837  |
| C  | -1.8442431 | 0.4135938  | -0.3224223 |
| C  | -1.2335101 | 2.0588588  | 2.8987717  |
| N  | 0.0803549  | 1.7106728  | -0.7948163 |
| C  | -1.1932721 | 1.4465488  | -1.2476463 |
| O  | -1.7665091 | 1.9598988  | -2.1849763 |
| O  | -4.1049381 | 2.0027848  | 1.8554307  |
| O  | 2.4970589  | -1.8042762 | 1.5187517  |
| Au | 4.4215909  | -1.5036912 | 0.5914747  |
| C  | -1.9575251 | 2.9965788  | 3.7959797  |
| C  | -4.7106611 | -3.0177792 | -1.8554673 |
| C  | -5.0827981 | -3.6656542 | -0.6739443 |
| C  | -5.2208371 | -2.9290802 | 0.5067197  |
| C  | -4.9903051 | -1.5576242 | 0.4870247  |
| C  | -4.6291171 | -0.8990482 | -0.6874783 |

|   |            |            |            |
|---|------------|------------|------------|
| C | -4.4864131 | -1.6503692 | -1.8564853 |
| C | -4.3473141 | 0.5773848  | -0.6616863 |
| O | -5.2831241 | -4.9986762 | -0.7720483 |
| C | -5.7261571 | -5.6889052 | 0.3728077  |
| H | 2.3892689  | 0.2213798  | -0.0436623 |
| H | -2.9974221 | 3.1227058  | 3.4909507  |
| H | -1.9286371 | 2.6265588  | 4.8283777  |
| H | -1.4570731 | 3.9729758  | 3.8073157  |
| H | -4.6139291 | -3.6134272 | -2.7594713 |
| H | -5.5195991 | -3.4102122 | 1.4334827  |
| H | -5.1110771 | -0.9775592 | 1.4034937  |
| H | -4.2050151 | -1.1496942 | -2.7830313 |
| H | -5.1473731 | 1.1398388  | -0.1660683 |
| H | -4.2197631 | 0.9813408  | -1.6738173 |
| H | -5.8571691 | -6.7307282 | 0.0752437  |
| H | -6.6862761 | -5.2964752 | 0.7355777  |
| H | -4.9895491 | -5.6400932 | 1.1876677  |
| P | 6.4936429  | -1.2141612 | -0.3596723 |
| C | 7.8170159  | -0.9752372 | 0.8631357  |
| H | 7.8814429  | -1.8502282 | 1.5166617  |
| H | 8.7763159  | -0.8335552 | 0.3519397  |
| H | 7.6004719  | -0.0960942 | 1.4772167  |
| C | 6.5473629  | 0.2452098  | -1.4437343 |
| H | 7.5469519  | 0.3554008  | -1.8799083 |
| H | 5.8126619  | 0.1347648  | -2.2472173 |



|   |            |            |            |
|---|------------|------------|------------|
| H | 6.3037319  | 1.1424948  | -0.8664933 |
| C | 7.0115009  | -2.6191642 | -1.3897293 |
| H | 7.9985349  | -2.4203422 | -1.8231993 |
| H | 7.0598479  | -3.5275562 | -0.7819883 |
| H | 6.2872319  | -2.7757542 | -2.1945943 |
| H | -1.9027671 | -0.5754002 | -0.8050793 |
| H | 0.8272479  | 1.6568688  | 1.1786347  |
| C | 0.8571099  | 2.9009408  | -1.2652623 |
| C | 0.1595379  | 4.1513178  | -0.7364553 |
| C | 2.2895839  | 2.8497488  | -0.7386753 |
| C | 0.9255289  | 2.9060708  | -2.7906273 |
| H | -0.8630841 | 4.2143788  | -1.1216283 |
| H | 0.1185789  | 4.1403658  | 0.3612387  |
| H | 0.6986869  | 5.0533088  | -1.0487403 |
| H | 2.8439499  | 1.9935728  | -1.1469483 |
| H | 2.8057989  | 3.7563578  | -1.0724373 |
| H | 2.3531749  | 2.8348128  | 0.3558917  |
| H | 1.5543959  | 3.7425548  | -3.1173933 |
| H | 1.3776019  | 1.9751988  | -3.1555143 |
| H | -0.0621381 | 3.0102748  | -3.2410683 |
| H | 1.0580819  | -0.6960592 | -0.7495803 |
| H | -0.1869571 | 1.8563978  | 3.1547367  |
| H | -1.8585591 | -1.1590122 | 2.0862967  |
| H | 0.2204789  | -2.4212072 | 2.5403527  |

Zero-point correction= 0.597055 (Hartree/Particle)

Thermal correction to Energy= 0.635655

Thermal correction to Enthalpy= 0.636599

Thermal correction to Gibbs Free Energy= 0.519145

Sum of electronic and zero-point Energies= -1936.599825

Sum of electronic and thermal Energies= -1936.561224

Sum of electronic and thermal Enthalpies= -1936.560280

Sum of electronic and thermal Free Energies= -1936.677734

**D-ts5**

|   |            |            |            |
|---|------------|------------|------------|
| C | 0.2195453  | -2.5486986 | -2.0494115 |
| C | -0.3959207 | -1.7094086 | -1.1844935 |
| C | 1.6129273  | -2.2361616 | -2.0879435 |
| C | 2.0081663  | -0.8332606 | -2.2471075 |
| C | 1.3674443  | 0.0205104  | -1.4408145 |
| C | 0.3556493  | -0.5623396 | -0.5228435 |
| C | 0.9741743  | -1.3114966 | 0.6864165  |
| C | -0.1314517 | -1.3094756 | 1.7052695  |
| N | -1.0247327 | -0.3272826 | 1.3337615  |
| C | -0.5866547 | 0.4267504  | 0.1656295  |
| C | 2.1817103  | -1.9278096 | 0.8135235  |
| N | -2.2185277 | 2.1196854  | -0.6771345 |
| C | -1.7102557 | 0.8648654  | -0.7789845 |
| O | -2.1418197 | 0.0749384  | -1.6095195 |
| O | -0.2437857 | -2.0246346 | 2.6820025  |
| O | 2.4722273  | -3.0639546 | -1.6284615 |
| H | 0.0073283  | 1.3007154  | 0.4806935  |

|    |            |            |            |
|----|------------|------------|------------|
| Au | 3.9957253  | -0.9007886 | 0.2055295  |
| C  | 2.4675943  | -2.7783316 | 2.0280865  |
| C  | -1.7085777 | 3.3953544  | -0.1104135 |
| C  | -0.3773867 | 3.7765794  | -0.7559555 |
| C  | -1.5907357 | 3.3583494  | 1.4097775  |
| C  | -2.7598277 | 4.4368474  | -0.4850465 |
| C  | -5.5652017 | -0.2319776 | 0.1923075  |
| C  | -5.6494317 | -1.5894166 | -0.1327185 |
| C  | -4.6497447 | -2.4672806 | 0.2973665  |
| C  | -3.5779917 | -1.9738816 | 1.0331035  |
| C  | -3.4720187 | -0.6186766 | 1.3412225  |
| C  | -4.4880937 | 0.2416624  | 0.9208325  |
| C  | -2.2647717 | -0.1127046 | 2.0800745  |
| O  | -6.7307257 | -1.9535206 | -0.8526235 |
| C  | -6.8811477 | -3.3140176 | -1.1871765 |
| H  | 2.8714533  | -0.5871006 | -2.8603335 |
| H  | 1.6530263  | 1.0683604  | -1.3477635 |
| H  | -2.9672837 | 2.2296354  | -1.3553195 |
| H  | 2.6850893  | -2.5714706 | -0.5953955 |
| H  | 1.6274163  | -3.4328776 | 2.2783865  |
| H  | 3.3668293  | -3.3837756 | 1.8800545  |
| H  | 2.6342843  | -2.1499426 | 2.9135855  |
| H  | -0.4662717 | 3.7857434  | -1.8483985 |
| H  | -0.0729727 | 4.7776944  | -0.4287385 |
| H  | 0.4297893  | 3.0864524  | -0.4791215 |

|   |            |            |            |
|---|------------|------------|------------|
| H | -2.5583517 | 3.1220574  | 1.8682935  |
| H | -1.2832247 | 4.3462444  | 1.7717765  |
| H | -0.8489547 | 2.6376644  | 1.7716935  |
| H | -2.4768007 | 5.4189254  | -0.0929475 |
| H | -2.8594117 | 4.5265834  | -1.5739645 |
| H | -3.7372087 | 4.1713894  | -0.0637345 |
| H | -6.3644857 | 0.4247904  | -0.1408045 |
| H | -4.7079197 | -3.5294806 | 0.0793175  |
| H | -2.8096377 | -2.6618966 | 1.3901555  |
| H | -4.4282447 | 1.3038114  | 1.1614105  |
| H | -2.1168947 | -0.6510996 | 3.0240285  |
| H | -2.3701837 | 0.9519654  | 2.3183245  |
| H | -7.8081497 | -3.3912976 | -1.7576775 |
| H | -6.9589717 | -3.9446096 | -0.2906855 |
| H | -6.0478757 | -3.6723556 | -1.8078835 |
| P | 6.0539313  | 0.2117864  | -0.0806465 |
| C | 6.2773613  | 0.9071634  | -1.7525745 |
| H | 5.4877643  | 1.6365764  | -1.9592195 |
| H | 7.2530253  | 1.3999014  | -1.8365615 |
| H | 6.2157013  | 0.1046884  | -2.4945535 |
| C | 7.4991923  | -0.8700636 | 0.1659915  |
| H | 8.4265763  | -0.3074456 | 0.0073655  |
| H | 7.4901233  | -1.2723216 | 1.1834925  |
| H | 7.4583353  | -1.7074506 | -0.5370855 |
| C | 6.3268793  | 1.6166624  | 1.0479335  |

|   |            |            |            |
|---|------------|------------|------------|
| H | 7.3048203  | 2.0732314  | 0.8559425  |
| H | 5.5433343  | 2.3667104  | 0.9049635  |
| H | 6.2885173  | 1.2693084  | 2.0847755  |
| H | -1.3437647 | -1.9915536 | -0.7309745 |
| H | -0.1605307 | -3.5337456 | -2.2980575 |

Zero-point correction= 0.588597 (Hartree/Particle)

Thermal correction to Energy= 0.627307

Thermal correction to Enthalpy= 0.628251

Thermal correction to Gibbs Free Energy= 0.515550

Sum of electronic and zero-point Energies= -1936.476099

Sum of electronic and thermal Energies= -1936.437388

Sum of electronic and thermal Enthalpies= -1936.436444

Sum of electronic and thermal Free Energies= -1936.549146

#### **D-int4**

|   |            |            |            |
|---|------------|------------|------------|
| C | 1.9556137  | 2.8660692  | -1.3576939 |
| C | 1.0555477  | 1.8736582  | -1.3147549 |
| C | 2.9266007  | 3.0997992  | -0.2782889 |
| C | 2.7896337  | 2.2091302  | 0.9180551  |
| C | 1.8727707  | 1.1936952  | 0.9428411  |
| C | 0.9866267  | 0.8549092  | -0.2247929 |
| C | 1.3550497  | -0.5404508 | -0.7391289 |
| C | 0.6358747  | -1.5175098 | 0.1251501  |
| N | -0.2979793 | -0.7987858 | 0.8308401  |
| C | -0.4368743 | 0.5684882  | 0.3781041  |
| C | 2.1452907  | -0.8158418 | -1.7846689 |

|    |            |            |            |
|----|------------|------------|------------|
| N  | -2.4395033 | 1.6592292  | -0.6600819 |
| C  | -1.4922963 | 0.6956692  | -0.7314689 |
| O  | -1.4102723 | -0.0685448 | -1.6830419 |
| O  | 0.8590827  | -2.7092008 | 0.2468211  |
| O  | 3.7847747  | 3.9587762  | -0.3149149 |
| H  | -0.6428383 | 1.2230692  | 1.2341671  |
| Au | 4.1019887  | 0.2910122  | 0.5202871  |
| C  | 2.4220277  | -2.1713268 | -2.3364529 |
| C  | -2.6785473 | 2.8106302  | 0.2472721  |
| C  | -1.4587003 | 3.7271122  | 0.3092791  |
| C  | -3.1068783 | 2.3576612  | 1.6387091  |
| C  | -3.8336023 | 3.5795602  | -0.3891589 |
| C  | -4.9935383 | -1.0270388 | 1.6439181  |
| C  | -5.2955113 | -1.5843878 | 0.3970541  |
| C  | -4.2680433 | -2.1081698 | -0.3934879 |
| C  | -2.9578233 | -2.0655958 | 0.0672141  |
| C  | -2.6413313 | -1.4866638 | 1.2947001  |
| C  | -3.6798013 | -0.9804368 | 2.0796141  |
| C  | -1.2168173 | -1.4285478 | 1.7731511  |
| O  | -6.5987373 | -1.5708748 | 0.0478991  |
| C  | -6.9662613 | -2.1659768 | -1.1762789 |
| H  | 3.3099207  | 2.5330712  | 1.8217991  |
| H  | 1.6866917  | 0.6383562  | 1.8660581  |
| H  | -3.0626463 | 1.5947272  | -1.4590129 |
| H  | 1.9747747  | -2.9592628 | -1.7268969 |

|   |            |            |            |
|---|------------|------------|------------|
| H | 2.0196837  | -2.2410768 | -3.3547859 |
| H | 3.5022127  | -2.3509488 | -2.4306389 |
| H | -1.1648833 | 4.0526432  | -0.6955489 |
| H | -1.6970243 | 4.6187122  | 0.9006711  |
| H | -0.5899143 | 3.2515982  | 0.7829571  |
| H | -3.9759453 | 1.6941382  | 1.5729221  |
| H | -3.3764573 | 3.2318482  | 2.2429601  |
| H | -2.3168703 | 1.8204832  | 2.1777671  |
| H | -4.0824933 | 4.4564052  | 0.2170111  |
| H | -3.5696713 | 3.9282512  | -1.3951039 |
| H | -4.7304043 | 2.9517502  | -0.4559949 |
| H | -5.8107353 | -0.6420518 | 2.2486661  |
| H | -4.4786343 | -2.5557678 | -1.3599059 |
| H | -2.1628173 | -2.4707838 | -0.5567509 |
| H | -3.4555583 | -0.5415298 | 3.0524881  |
| H | -0.8029293 | -2.4317618 | 1.9373811  |
| H | -1.1640723 | -0.8863358 | 2.7295961  |
| H | -8.0500013 | -2.0659188 | -1.2551809 |
| H | -6.7014093 | -3.2318228 | -1.2023519 |
| H | -6.4961673 | -1.6589308 | -2.0306009 |
| P | 5.6694687  | -1.4271018 | 0.2275951  |
| C | 7.0839377  | -1.3937238 | 1.3694921  |
| H | 6.7277057  | -1.4297988 | 2.4031921  |
| H | 7.7334207  | -2.2565298 | 1.1808931  |
| H | 7.6567097  | -0.4724548 | 1.2281791  |

|   |           |            |            |
|---|-----------|------------|------------|
| C | 6.3911747 | -1.4661298 | -1.4419749 |
| H | 7.0453027 | -2.3394958 | -1.5466169 |
| H | 5.5969837 | -1.5168558 | -2.1932429 |
| H | 6.9735417 | -0.5558668 | -1.6138039 |
| C | 4.8522997 | -3.0324298 | 0.4837891  |
| H | 5.5370467 | -3.8521988 | 0.2374221  |
| H | 4.5473577 | -3.1181018 | 1.5315451  |
| H | 3.9506457 | -3.1017728 | -0.1344529 |
| H | 0.3681137 | 1.7123372  | -2.1455489 |
| H | 2.0075227 | 3.5551182  | -2.1973009 |
| H | 2.5785947 | 0.0300952  | -2.3275319 |

Zero-point correction= 0.594884 (Hartree/Particle)

Thermal correction to Energy= 0.634268

Thermal correction to Enthalpy= 0.635212

Thermal correction to Gibbs Free Energy= 0.520594

Sum of electronic and zero-point Energies= -1936.575403

Sum of electronic and thermal Energies= -1936.536019

Sum of electronic and thermal Enthalpies= -1936.535075

Sum of electronic and thermal Free Energies= -1936.649693

#### **D-ts6**

|   |            |            |            |
|---|------------|------------|------------|
| C | -0.2059108 | -1.0141657 | -3.3453932 |
| C | -0.7290068 | 0.0075313  | -2.6660232 |
| C | -0.3754398 | -2.4091987 | -2.8987152 |
| C | -1.1187018 | -2.6182227 | -1.5864402 |
| C | -1.9537818 | -1.5644747 | -1.1684542 |



|    |            |            |            |
|----|------------|------------|------------|
| C  | -1.5480978 | -0.1350547 | -1.4011942 |
| C  | -2.7053588 | 0.8466003  | -1.4381552 |
| C  | -2.3010578 | 2.0689143  | -0.6887752 |
| N  | -1.0800178 | 1.7854483  | -0.1005662 |
| C  | -0.6731478 | 0.4100153  | -0.2282412 |
| C  | -3.8610968 | 0.6539193  | -2.0868672 |
| N  | -1.9447748 | -1.3053617 | 1.0668728  |
| C  | -0.8725578 | -0.3441087 | 1.0859668  |
| O  | -0.1708528 | -0.1376837 | 2.0462858  |
| O  | -2.8772118 | 3.1324593  | -0.5879002 |
| O  | 0.0274032  | -3.3600237 | -3.5346902 |
| Au | 0.8010442  | -2.5631037 | -0.4400182 |
| C  | -5.0160438 | 1.5861443  | -2.1447402 |
| C  | 3.3918662  | 2.1496063  | 1.1742228  |
| C  | 3.8848902  | 2.3487163  | -0.1197512 |
| C  | 3.0062722  | 2.7118183  | -1.1450442 |
| C  | 1.6508542  | 2.8637353  | -0.8622892 |
| C  | 1.1453732  | 2.6541853  | 0.4193058  |
| C  | 2.0385562  | 2.2940523  | 1.4328928  |
| C  | -0.3298198 | 2.7537803  | 0.6908818  |
| O  | 5.2088682  | 2.1357053  | -0.2818082 |
| C  | 5.7620362  | 2.3365613  | -1.5649772 |
| H  | -4.8295228 | 2.5042163  | -1.5855632 |
| H  | -5.2398748 | 1.8427203  | -3.1875522 |
| H  | -5.9161118 | 1.0935243  | -1.7551722 |

|   |            |            |            |
|---|------------|------------|------------|
| H | 4.0969072  | 1.8794053  | 1.9576188  |
| H | 3.3658942  | 2.8890353  | -2.1542312 |
| H | 0.9700352  | 3.1553263  | -1.6627782 |
| H | 1.6618422  | 2.1233783  | 2.4409818  |
| H | -0.7461178 | 3.7321413  | 0.4192188  |
| H | -0.5262748 | 2.6046223  | 1.7631988  |
| H | 6.8304182  | 2.1339713  | -1.4769102 |
| H | 5.6209082  | 3.3697303  | -1.9085142 |
| H | 5.3240862  | 1.6488053  | -2.3037812 |
| P | 2.8894632  | -2.2057247 | 0.5778558  |
| C | 3.9267812  | -3.6824337 | 0.8117408  |
| H | 4.0794852  | -4.1856747 | -0.1476102 |
| H | 4.8985292  | -3.3926637 | 1.2280868  |
| H | 3.4351422  | -4.3793437 | 1.4969058  |
| C | 2.7916422  | -1.3943407 | 2.2009488  |
| H | 3.8029392  | -1.2219987 | 2.5887228  |
| H | 2.2718642  | -0.4359067 | 2.0895808  |
| H | 2.2284632  | -2.0156887 | 2.9036198  |
| C | 3.8610532  | -1.0698647 | -0.4638452 |
| H | 4.7940182  | -0.7825777 | 0.0373548  |
| H | 4.0877092  | -1.5503387 | -1.4209212 |
| H | 3.2718992  | -0.1628267 | -0.6514602 |
| H | 0.4052812  | 0.3565183  | -0.4584452 |
| H | -3.0064728 | -1.7550187 | -0.9742222 |
| C | -3.1255398 | -1.0304257 | 1.9893588  |

|   |            |            |            |
|---|------------|------------|------------|
| C | -3.5432788 | 0.4283513  | 1.9022198  |
| C | -4.2548068 | -1.9311017 | 1.5100618  |
| C | -2.7278888 | -1.3868977 | 3.4179758  |
| H | -2.7443308 | 1.1130703  | 2.2139048  |
| H | -3.8776538 | 0.7002803  | 0.8946858  |
| H | -4.3863488 | 0.5920963  | 2.5817518  |
| H | -3.9431018 | -2.9827567 | 1.4713928  |
| H | -5.1020958 | -1.8621627 | 2.2013498  |
| H | -4.6134358 | -1.6312137 | 0.5172768  |
| H | -3.5756558 | -1.2141407 | 4.0909858  |
| H | -2.4530098 | -2.4469657 | 3.4983128  |
| H | -1.8835728 | -0.7818447 | 3.7621978  |
| H | -3.9774578 | -0.2910797 | -2.6288042 |
| H | -0.5683228 | 1.0372453  | -2.9868932 |
| H | 0.3650402  | -0.8724197 | -4.2593782 |
| H | -1.5420618 | -3.6237087 | -1.5301682 |
| H | -1.5507498 | -2.2031117 | 1.3625548  |

Zero-point correction= 0.593360 (Hartree/Particle)

Thermal correction to Energy= 0.631730

Thermal correction to Enthalpy= 0.632675

Thermal correction to Gibbs Free Energy= 0.521211

Sum of electronic and zero-point Energies= -1936.539997

Sum of electronic and thermal Energies= -1936.501626

Sum of electronic and thermal Enthalpies= -1936.500682

Sum of electronic and thermal Free Energies= -1936.612146

**D-int5**

|    |            |            |            |
|----|------------|------------|------------|
| C  | 1.0462239  | 0.4468157  | 3.0507563  |
| C  | -0.0697581 | 0.3338147  | 2.3284723  |
| C  | 2.2325689  | 1.1709147  | 2.5469693  |
| C  | 2.3201629  | 1.3793977  | 1.0752053  |
| C  | 1.0166709  | 1.5013657  | 0.2993343  |
| C  | -0.2923001 | 1.0189877  | 1.0151903  |
| C  | -1.2538111 | 2.1889077  | 1.1873723  |
| C  | -2.2824671 | 2.1167177  | 0.1219173  |
| N  | -2.0258331 | 0.9610787  | -0.6122047 |
| C  | -1.0328891 | 0.1152647  | 0.0091813  |
| C  | -1.1714571 | 3.1110227  | 2.1560573  |
| N  | 1.1009739  | 0.7286587  | -1.0242237 |
| C  | -0.0353121 | -0.2757893 | -1.0400807 |
| O  | -0.0245021 | -1.2033553 | -1.7863627 |
| O  | -3.1973421 | 2.8771027  | -0.1197987 |
| O  | 3.1382239  | 1.4934047  | 3.3013973  |
| Au | 3.6337779  | -0.2958593 | 0.6357643  |
| C  | -2.0543931 | 4.2884727  | 2.3488703  |
| C  | -4.2911151 | -2.9973963 | -0.3336347 |
| C  | -5.3575611 | -2.6273853 | 0.4940953  |
| C  | -5.6701971 | -1.2746273 | 0.6591063  |
| C  | -4.9184321 | -0.3112133 | -0.0044377 |
| C  | -3.8593261 | -0.6693893 | -0.8370057 |
| C  | -3.5545241 | -2.0266813 | -0.9897937 |

|   |            |            |            |
|---|------------|------------|------------|
| C | -3.0358541 | 0.3893397  | -1.5096767 |
| O | -6.0185351 | -3.6428033 | 1.0848083  |
| C | -7.1259411 | -3.3328893 | 1.9018473  |
| H | -2.8274851 | 4.3570117  | 1.5827103  |
| H | -2.5261001 | 4.2404917  | 3.3382653  |
| H | -1.4558841 | 5.2079947  | 2.3469383  |
| H | -4.0740551 | -4.0560173 | -0.4487827 |
| H | -6.4981061 | -0.9656383 | 1.2899323  |
| H | -5.1648961 | 0.7431847  | 0.1195763  |
| H | -2.7297581 | -2.3220993 | -1.6398687 |
| H | -3.6481031 | 1.2404227  | -1.8283727 |
| H | -2.5308011 | -0.0164413 | -2.3979947 |
| H | -7.5194181 | -4.2847593 | 2.2617943  |
| H | -7.9101311 | -2.8110303 | 1.3367003  |
| H | -6.8327941 | -2.7173293 | 2.7635873  |
| P | 5.1590129  | -2.0795803 | 0.2414813  |
| C | 6.8913739  | -1.6586873 | 0.6232183  |
| H | 6.9779689  | -1.3697353 | 1.6750733  |
| H | 7.5436299  | -2.5181223 | 0.4291023  |
| H | 7.2130639  | -0.8140853 | 0.0064543  |
| C | 5.1937219  | -2.6600803 | -1.4880237 |
| H | 5.9111309  | -3.4809983 | -1.6020997 |
| H | 4.1985539  | -3.0093643 | -1.7810907 |
| H | 5.4841019  | -1.8366433 | -2.1481307 |
| C | 4.8203339  | -3.5790633 | 1.2219953  |

|   |            |            |            |
|---|------------|------------|------------|
| H | 5.5614069  | -4.3552573 | 0.9982713  |
| H | 4.8606049  | -3.3394263 | 2.2888823  |
| H | 3.8201199  | -3.9564783 | 0.9889413  |
| H | -1.4795531 | -0.7936193 | 0.4448543  |
| H | 0.8504879  | 2.5425167  | 0.0043093  |
| C | 1.3317069  | 1.5495037  | -2.3384737 |
| C | 0.0778759  | 2.3281467  | -2.6809967 |
| C | 2.5153619  | 2.4710347  | -2.0833187 |
| C | 1.6888179  | 0.5549137  | -3.4338867 |
| H | -0.7763761 | 1.6719437  | -2.8806207 |
| H | -0.2061611 | 3.0437687  | -1.9013397 |
| H | 0.2741289  | 2.9018367  | -3.5932917 |
| H | 3.4130459  | 1.9112307  | -1.7922957 |
| H | 2.7395509  | 2.9970837  | -3.0174057 |
| H | 2.3148989  | 3.2335057  | -1.3244287 |
| H | 1.9684299  | 1.1208077  | -4.3288007 |
| H | 2.5517779  | -0.0623653 | -3.1483767 |
| H | 0.8609999  | -0.1073633 | -3.6956987 |
| H | -0.3714131 | 2.9798807  | 2.8919263  |
| H | -0.9413211 | -0.1850913 | 2.7299233  |
| H | 1.1255959  | 0.0334207  | 4.0536433  |
| H | 2.9715299  | 2.2419027  | 0.8889883  |
| H | 1.9560719  | 0.1447997  | -0.9323957 |

Zero-point correction= 0.596385 (Hartree/Particle)

Thermal correction to Energy= 0.634058

Thermal correction to Enthalpy= 0.635002

Thermal correction to Gibbs Free Energy= 0.523725

Sum of electronic and zero-point Energies= -1936.557334

Sum of electronic and thermal Energies= -1936.519661

Sum of electronic and thermal Enthalpies= -1936.518717

Sum of electronic and thermal Free Energies= -1936.629995

**D-ts7**

|    |            |            |            |
|----|------------|------------|------------|
| C  | -0.9417292 | -0.7347267 | -3.3011256 |
| C  | -1.2927762 | 0.3531683  | -2.6047276 |
| C  | -0.9579832 | -2.0840037 | -2.7198606 |
| C  | -1.4518202 | -2.2033277 | -1.2958546 |
| C  | -2.2845522 | -1.0453827 | -0.7297946 |
| C  | -1.8394462 | 0.3439543  | -1.2078456 |
| C  | -2.9125782 | 1.4178873  | -1.0750206 |
| C  | -2.3073962 | 2.5983493  | -0.3923216 |
| N  | -1.0349382 | 2.2177843  | -0.0013476 |
| C  | -0.8097762 | 0.8085623  | -0.1614536 |
| C  | -4.1559282 | 1.3345983  | -1.5652916 |
| N  | -1.9531312 | -1.0988187 | 0.7321494  |
| C  | -1.1645122 | 0.0303763  | 1.0959854  |
| O  | -0.7997652 | 0.3028643  | 2.2115314  |
| O  | -2.7822332 | 3.6991553  | -0.2023406 |
| O  | -0.5458482 | -3.0600217 | -3.3232486 |
| Au | 0.7354928  | -2.3849687 | -0.5364936 |
| C  | -5.2158662 | 2.3727903  | -1.4989026 |

|   |            |            |            |
|---|------------|------------|------------|
| C | 3.4365288  | 2.0152223  | 1.3022704  |
| C | 3.9804368  | 2.2779313  | 0.0411774  |
| C | 3.1655538  | 2.7991553  | -0.9682146 |
| C | 1.8235868  | 3.0562533  | -0.6985446 |
| C | 1.2701198  | 2.8030693  | 0.5552874  |
| C | 2.0957558  | 2.2694173  | 1.5491754  |
| C | -0.1836742 | 3.0675093  | 0.8225114  |
| O | 5.2871958  | 1.9619013  | -0.1127816 |
| C | 5.8998738  | 2.2604683  | -1.3494236 |
| H | -4.8762362 | 3.2701673  | -0.9801816 |
| H | -5.5342312 | 2.6436413  | -2.5133536 |
| H | -6.1070532 | 1.9729293  | -0.9993116 |
| H | 4.0946118  | 1.6231213  | 2.0750484  |
| H | 3.5651738  | 3.0202833  | -1.9534886 |
| H | 1.1921768  | 3.4709513  | -1.4846246 |
| H | 1.6770188  | 2.0605243  | 2.5334854  |
| H | -0.4703992 | 4.0971803  | 0.5750974  |
| H | -0.4099672 | 2.9131783  | 1.8864234  |
| H | 6.9490168  | 1.9769963  | -1.2521976 |
| H | 5.8383208  | 3.3316063  | -1.5816736 |
| H | 5.4461158  | 1.6878943  | -2.1724046 |
| P | 2.9632038  | -2.1733377 | 0.1844684  |
| C | 3.9942188  | -3.6700587 | 0.2277424  |
| H | 4.0786988  | -4.0953657 | -0.7765516 |
| H | 4.9942818  | -3.4196047 | 0.6001084  |



|   |            |            |            |
|---|------------|------------|------------|
| H | 3.5408558  | -4.4164847 | 0.8865874  |
| C | 2.9463978  | -1.5092487 | 1.8783704  |
| H | 3.9698928  | -1.3325197 | 2.2301914  |
| H | 2.3942928  | -0.5613707 | 1.8810394  |
| H | 2.4432078  | -2.2131437 | 2.5488404  |
| C | 3.8621868  | -0.9538207 | -0.8215956 |
| H | 4.8162268  | -0.6873727 | -0.3490146 |
| H | 4.0420478  | -1.3606827 | -1.8216796 |
| H | 3.2533938  | -0.0450647 | -0.9100666 |
| H | 0.2392328  | 0.5948723  | -0.4358046 |
| H | -3.3585542 | -1.1864117 | -0.8932206 |
| C | -2.8648072 | -1.7672647 | 1.7464444  |
| C | -3.9258002 | -0.7579447 | 2.1634234  |
| C | -3.5106242 | -2.9938337 | 1.1131964  |
| C | -2.0229152 | -2.2305457 | 2.9326094  |
| H | -3.4750542 | 0.1282473  | 2.6226214  |
| H | -4.5323042 | -0.4394177 | 1.3059694  |
| H | -4.5983202 | -1.2125227 | 2.8994554  |
| H | -2.7673392 | -3.7536067 | 0.8421504  |
| H | -4.1772092 | -3.4461677 | 1.8547154  |
| H | -4.1259642 | -2.7618407 | 0.2370614  |
| H | -2.6476282 | -2.8505857 | 3.5849124  |
| H | -1.1804402 | -2.8471507 | 2.5897064  |
| H | -1.6300592 | -1.3970097 | 3.5151124  |
| H | -4.4284952 | 0.4033473  | -2.0749706 |

|   |            |            |            |
|---|------------|------------|------------|
| H | -1.1896882 | 1.3431003  | -3.0514226 |
| H | -0.5743242 | -0.6668047 | -4.3223846 |
| H | -1.9502062 | -3.1722907 | -1.1875366 |
| H | -1.0035452 | -1.9957387 | 0.1012054  |

Zero-point correction= 0.590396 (Hartree/Particle)

Thermal correction to Energy= 0.628268

Thermal correction to Enthalpy= 0.629212

Thermal correction to Gibbs Free Energy= 0.519939

Sum of electronic and zero-point Energies= -1936.529820

Sum of electronic and thermal Energies= -1936.491948

Sum of electronic and thermal Enthalpies= -1936.491003

Sum of electronic and thermal Free Energies= -1936.600277

### **E-1**

|   |            |            |            |
|---|------------|------------|------------|
| C | 1.5926263  | -2.3383304 | 2.1785921  |
| C | 0.3957783  | -2.8914254 | 2.6751151  |
| C | -0.7758627 | -2.1821944 | 2.5648371  |
| C | -0.7915137 | -0.8995224 | 1.9669241  |
| C | 0.4236523  | -0.3160234 | 1.4863351  |
| C | 1.6033243  | -1.0890864 | 1.6068931  |
| C | -2.0222067 | -0.1893194 | 1.8361881  |
| C | -2.0304287 | 1.0828486  | 1.3084121  |
| C | -0.8308857 | 1.6467856  | 0.8544971  |
| C | 0.3865323  | 0.9927296  | 0.8997501  |
| C | 0.2784393  | 1.1869046  | -2.1123099 |
| C | 1.7032393  | 0.8135876  | -1.9919309 |

|    |            |            |            |
|----|------------|------------|------------|
| N  | 2.3071233  | 1.0499566  | -0.7948189 |
| C  | 1.5629643  | 1.7427386  | 0.2956301  |
| C  | -0.7765587 | 1.6931326  | -2.4949119 |
| N  | 2.9491273  | 3.5390666  | 1.3223911  |
| C  | 2.5534633  | 2.2323086  | 1.3579021  |
| O  | 3.0050273  | 1.4787586  | 2.2052491  |
| O  | 2.2547993  | 0.3310086  | -2.9700429 |
| O  | -3.1380307 | -0.8152944 | 2.2361181  |
| H  | 1.1172773  | 2.6322586  | -0.1610539 |
| Au | -1.0409037 | -0.6194544 | -1.6128529 |
| C  | -2.0110637 | 2.3387756  | -2.8913129 |
| C  | 2.5908063  | 4.7215876  | 0.5068571  |
| C  | 1.1584763  | 5.1736746  | 0.7835981  |
| C  | 2.8259713  | 4.4811056  | -0.9836979 |
| C  | 3.5462893  | 5.8210226  | 0.9666161  |
| C  | 5.4081003  | -1.9305474 | 1.1867521  |
| C  | 5.1473733  | -3.0413684 | 0.3794111  |
| C  | 4.4516313  | -2.8768344 | -0.8198279 |
| C  | 4.0228513  | -1.6074334 | -1.1977509 |
| C  | 4.2680503  | -0.4941094 | -0.3951339 |
| C  | 4.9724163  | -0.6744054 | 0.7993051  |
| C  | 3.7802363  | 0.8715376  | -0.7960859 |
| O  | 5.6050623  | -4.2293014 | 0.8452641  |
| C  | 5.3704843  | -5.3749094 | 0.0655581  |
| H  | 2.5283893  | -2.8881024 | 2.2634151  |

|   |            |            |            |
|---|------------|------------|------------|
| H | 0.4008603  | -3.8702404 | 3.1498551  |
| H | -1.7123497 | -2.5803224 | 2.9479911  |
| H | 2.5436413  | -0.6648534 | 1.2864131  |
| H | -2.9662097 | 1.6231776  | 1.1988301  |
| H | -0.8881287 | 2.6361356  | 0.3985251  |
| H | 3.5710553  | 3.7235756  | 2.1027491  |
| H | -3.9140507 | -0.4080904 | 1.7964831  |
| H | -1.7937317 | 3.3654666  | -3.2078289 |
| H | -2.4787327 | 1.8146246  | -3.7316039 |
| H | -2.7282457 | 2.3721086  | -2.0575459 |
| H | 1.0162973  | 5.3618676  | 1.8536361  |
| H | 0.9440033  | 6.1011446  | 0.2388821  |
| H | 0.4158173  | 4.4299876  | 0.4743381  |
| H | 3.8519703  | 4.1367746  | -1.1604589 |
| H | 2.6830243  | 5.4204236  | -1.5309339 |
| H | 2.1394283  | 3.7474156  | -1.4204629 |
| H | 3.3493013  | 6.7475186  | 0.4171161  |
| H | 3.4171233  | 6.0320716  | 2.0357031  |
| H | 4.5895853  | 5.5334096  | 0.7886241  |
| H | 5.9503763  | -2.0837264 | 2.1162411  |
| H | 4.2475583  | -3.7234464 | -1.4691329 |
| H | 3.4905623  | -1.4744124 | -2.1379439 |
| H | 5.1442343  | 0.1797176  | 1.4525941  |
| H | 4.1031083  | 1.0990776  | -1.8185909 |
| H | 4.2143663  | 1.6325296  | -0.1406119 |

|   |            |            |            |
|---|------------|------------|------------|
| H | 5.8110103  | -6.2152454 | 0.6059481  |
| H | 5.8439973  | -5.2985594 | -0.9238869 |
| H | 4.2950893  | -5.5617724 | -0.0704079 |
| P | -1.9429427 | -2.7517604 | -1.3307069 |
| C | -3.3873447 | -2.8881614 | -0.2496119 |
| H | -4.1732527 | -2.2145664 | -0.6053609 |
| H | -3.7603217 | -3.9192104 | -0.2543519 |
| H | -3.1487297 | -2.5840194 | 0.7744091  |
| C | -0.7056157 | -3.9402914 | -0.7254749 |
| H | -1.1421777 | -4.9451244 | -0.6792509 |
| H | 0.1596843  | -3.9425354 | -1.3960249 |
| H | -0.3751557 | -3.6373564 | 0.2747891  |
| C | -2.4986517 | -3.4215714 | -2.9339769 |
| H | -2.8838747 | -4.4394614 | -2.8002219 |
| H | -3.2958057 | -2.7855964 | -3.3307449 |
| H | -1.6673047 | -3.4339124 | -3.6452669 |
| C | -7.1151117 | -0.0364874 | 2.3373391  |
| F | -6.1311417 | 0.0953446  | 3.2183941  |
| F | -8.1067227 | -0.7148564 | 2.8903761  |
| F | -7.5419597 | 1.1602696  | 1.9800391  |
| S | -6.5071127 | -0.9742124 | 0.8699281  |
| O | -7.6293557 | -1.0569604 | -0.0467379 |
| O | -5.9178377 | -2.1820224 | 1.4289451  |
| N | -5.2505267 | -0.0455794 | 0.3738581  |
| S | -5.4322737 | 1.1270626  | -0.7180209 |

|   |            |            |            |
|---|------------|------------|------------|
| O | -6.7494137 | 1.7238436  | -0.8266259 |
| O | -4.2540387 | 1.9919306  | -0.6478749 |
| C | -5.1844257 | 0.2501486  | -2.3260919 |
| F | -3.9430667 | -0.2644834 | -2.3892199 |
| F | -6.0398297 | -0.7386124 | -2.4886189 |
| F | -5.3087087 | 1.1196986  | -3.3182989 |

Zero-point correction= 0.701154 (Hartree/Particle)

Thermal correction to Energy= 0.758671

Thermal correction to Enthalpy= 0.759615

Thermal correction to Gibbs Free Energy= 0.605926

Sum of electronic and zero-point Energies= -3916.901802

Sum of electronic and thermal Energies= -3916.844284

Sum of electronic and thermal Enthalpies= -3916.843340

Sum of electronic and thermal Free Energies= -3916.997030

### **E-tsl**

|   |            |            |            |
|---|------------|------------|------------|
| C | 1.2872475  | -1.2882848 | 3.0110010  |
| C | 0.0281535  | -1.5203688 | 3.5949700  |
| C | -1.0931485 | -0.9658658 | 3.0303860  |
| C | -0.9944825 | -0.1661788 | 1.8677680  |
| C | 0.2831305  | 0.1251982  | 1.3069570  |
| C | 1.4148565  | -0.4822388 | 1.9051770  |
| C | -2.1880345 | 0.3054212  | 1.2265300  |
| C | -2.0997695 | 1.0166772  | 0.0364900  |
| C | -0.8459305 | 1.3480442  | -0.4651900 |
| C | 0.3447705  | 0.9448482  | 0.1244800  |

|    |            |            |            |
|----|------------|------------|------------|
| C  | 0.7270435  | -1.0216738 | -1.4937660 |
| C  | 2.0808355  | -0.5009378 | -1.6567410 |
| N  | 2.5576945  | 0.5584482  | -0.9620730 |
| C  | 1.6189305  | 1.5529252  | -0.4275060 |
| C  | -0.1516615 | -1.8797388 | -1.7628040 |
| N  | 2.0600535  | 3.7555862  | 0.6690920  |
| C  | 2.3056665  | 2.4132032  | 0.6435780  |
| O  | 3.0050325  | 1.9070852  | 1.5084900  |
| O  | 2.7120905  | -1.1262508 | -2.5020410 |
| O  | -3.3367745 | 0.0071422  | 1.8150280  |
| H  | 1.3153575  | 2.2121532  | -1.2549840 |
| Au | -1.6964285 | -2.2934378 | -0.2892630 |
| C  | -0.2975525 | -2.8770848 | -2.8752640 |
| C  | 1.6673265  | 4.7684402  | -0.3417460 |
| C  | 0.1968235  | 4.6629712  | -0.7319280 |
| C  | 2.5677115  | 4.6941792  | -1.5730730 |
| C  | 1.8857535  | 6.1117972  | 0.3513110  |
| C  | 6.3303915  | -0.9000578 | 0.9192130  |
| C  | 7.0327915  | -1.6838958 | -0.0022470 |
| C  | 6.7154115  | -1.6091098 | -1.3577950 |
| C  | 5.6977775  | -0.7543338 | -1.7745320 |
| C  | 4.9954965  | 0.0327522  | -0.8689890 |
| C  | 5.3268645  | -0.0509028 | 0.4893750  |
| C  | 3.9225845  | 0.9761492  | -1.3416020 |
| O  | 7.9995005  | -2.4796208 | 0.5178680  |

|   |            |            |            |
|---|------------|------------|------------|
| C | 8.7344715  | -3.2832808 | -0.3704290 |
| H | 2.1753855  | -1.7452908 | 3.4409090  |
| H | -0.0545165 | -2.1378358 | 4.4865410  |
| H | -2.0777055 | -1.1279938 | 3.4610500  |
| H | 2.3965435  | -0.3027088 | 1.4823300  |
| H | -3.0004275 | 1.3482872  | -0.4717560 |
| H | -0.8059295 | 1.9274152  | -1.3855350 |
| H | 2.5253415  | 4.1438362  | 1.4834300  |
| H | 0.5345225  | -2.7676638 | -3.5779430 |
| H | -0.2971565 | -3.8959488 | -2.4744530 |
| H | -1.2509205 | -2.7332978 | -3.3934770 |
| H | -0.4375585 | 4.5603882  | 0.1555210  |
| H | -0.1057705 | 5.5666322  | -1.2740020 |
| H | 0.0004945  | 3.8146252  | -1.3935950 |
| H | 3.6214705  | 4.8055902  | -1.2900540 |
| H | 2.3133595  | 5.5003862  | -2.2717790 |
| H | 2.4566825  | 3.7472312  | -2.1154380 |
| H | 1.6368205  | 6.9325452  | -0.3292750 |
| H | 1.2475695  | 6.2003922  | 1.2388390  |
| H | 2.9329415  | 6.2337662  | 0.6562230  |
| H | 6.6019915  | -0.9744098 | 1.9693000  |
| H | 7.2419215  | -2.2105508 | -2.0928460 |
| H | 5.4351465  | -0.7133188 | -2.8300430 |
| H | 4.7851045  | 0.5639762  | 1.2066780  |
| H | 3.9675605  | 1.0754032  | -2.4353080 |



|   |            |            |            |
|---|------------|------------|------------|
| H | 4.0802405  | 1.9708922  | -0.9108290 |
| H | 9.4541635  | -3.8390148 | 0.2342930  |
| H | 9.2800565  | -2.6792088 | -1.1099290 |
| H | 8.0892995  | -3.9964668 | -0.9037430 |
| P | -3.3215315 | -3.5472328 | 0.8940280  |
| C | -4.5555025 | -2.7461778 | 1.9678060  |
| H | -5.1341245 | -2.0177728 | 1.3942440  |
| H | -5.2256955 | -3.5185928 | 2.3654510  |
| H | -4.0620165 | -2.2194778 | 2.7880530  |
| C | -2.5671265 | -4.8113008 | 1.9788680  |
| H | -3.3393285 | -5.4344308 | 2.4459590  |
| H | -1.8931895 | -5.4434678 | 1.3922820  |
| H | -1.9797245 | -4.3140088 | 2.7577800  |
| C | -4.3262935 | -4.5125828 | -0.2848700 |
| H | -5.0699675 | -5.1157068 | 0.2498310  |
| H | -4.8310415 | -3.8183118 | -0.9632360 |
| H | -3.6743635 | -5.1694618 | -0.8695180 |
| H | -4.1200315 | 0.2091682  | 1.2378050  |
| C | -5.3140255 | 3.0492902  | 0.1704580  |
| F | -4.3172085 | 2.9765392  | 1.0479260  |
| F | -5.9531575 | 4.1936632  | 0.3354220  |
| F | -4.8049755 | 3.0025152  | -1.0529230 |
| S | -6.4912285 | 1.6558032  | 0.4443630  |
| O | -7.5480175 | 1.8478852  | -0.5306770 |
| O | -6.7563515 | 1.6909082  | 1.8700510  |

|   |            |            |            |
|---|------------|------------|------------|
| N | -5.5356625 | 0.3557752  | 0.1618070  |
| S | -5.4450605 | -0.3789558 | -1.2753460 |
| O | -5.5360375 | 0.4727992  | -2.4462310 |
| O | -4.3420665 | -1.3393238 | -1.1624370 |
| C | -6.9226235 | -1.4910098 | -1.3430650 |
| F | -6.9674025 | -2.2474008 | -0.2478560 |
| F | -8.0446015 | -0.8175958 | -1.4516040 |
| F | -6.7782605 | -2.2889478 | -2.3952190 |

Zero-point correction= 0.699129 (Hartree/Particle)

Thermal correction to Energy= 0.756368

Thermal correction to Enthalpy= 0.757312

Thermal correction to Gibbs Free Energy= 0.603305

Sum of electronic and zero-point Energies= -3916.876172

Sum of electronic and thermal Energies= -3916.818933

Sum of electronic and thermal Enthalpies= -3916.817988

Sum of electronic and thermal Free Energies= -3916.971995

### **E-int1**

|   |            |            |            |
|---|------------|------------|------------|
| C | 1.9294502  | -0.9693534 | 2.8927014  |
| C | 0.8210062  | -0.7361004 | 3.7119434  |
| C | -0.3859488 | -0.4007844 | 3.1362924  |
| C | -0.4868688 | -0.2749294 | 1.7381624  |
| C | 0.6350862  | -0.4889834 | 0.9099274  |
| C | 1.8360622  | -0.8599604 | 1.5140904  |
| C | -1.7643158 | 0.0319746  | 1.1469694  |
| C | -1.9195768 | 0.0834426  | -0.2719126 |

|    |            |            |            |
|----|------------|------------|------------|
| C  | -0.8522768 | -0.1424374 | -1.0649716 |
| C  | 0.5400952  | -0.2863504 | -0.5843326 |
| C  | 1.3207652  | -1.3425284 | -1.3687246 |
| C  | 2.6651142  | -0.7750674 | -1.6544846 |
| N  | 2.6594252  | 0.5331616  | -1.1927196 |
| C  | 1.3140552  | 1.0254166  | -1.0486766 |
| C  | 0.8447602  | -2.5765154 | -1.6404246 |
| N  | 0.2211382  | 3.1423266  | -0.3823736 |
| C  | 1.1384572  | 2.1750746  | -0.0678206 |
| O  | 1.7050112  | 2.1769316  | 1.0143214  |
| O  | 3.6441542  | -1.2996344 | -2.1567716 |
| O  | -2.7638698 | 0.1983626  | 1.9393404  |
| H  | 0.8968482  | 1.3082996  | -2.0276006 |
| Au | -0.9890448 | -3.2192104 | -0.8855376 |
| C  | 1.6465652  | -3.5763554 | -2.4134576 |
| C  | -0.1388268 | 3.7863046  | -1.6772546 |
| C  | -1.0951288 | 2.9464006  | -2.5195056 |
| C  | 1.1195752  | 4.1337236  | -2.4696056 |
| C  | -0.8625798 | 5.0738576  | -1.2873316 |
| C  | 5.7845762  | 0.6493306  | 1.8800864  |
| C  | 6.9561412  | 0.0676726  | 1.3830184  |
| C  | 7.1185452  | -0.0939484 | 0.0081914  |
| C  | 6.1067322  | 0.3255416  | -0.8534036 |
| C  | 4.9442012  | 0.9144346  | -0.3729486 |
| C  | 4.7932502  | 1.0697276  | 1.0110424  |

|   |            |            |            |
|---|------------|------------|------------|
| C | 3.8545742  | 1.3587276  | -1.3140026 |
| O | 7.8687432  | -0.3076154 | 2.3149324  |
| C | 9.0618962  | -0.8945014 | 1.8609804  |
| H | 2.8862532  | -1.2383354 | 3.3350654  |
| H | 0.9080882  | -0.8236814 | 4.7913914  |
| H | -1.2708898 | -0.2265644 | 3.7419764  |
| H | 2.7201492  | -1.0377084 | 0.9088174  |
| H | -2.9105308 | 0.2313206  | -0.6870146 |
| H | -0.9827088 | -0.1507404 | -2.1470646 |
| H | 0.1461092  | 3.7741576  | 0.4098514  |
| H | 2.6163082  | -3.1945024 | -2.7451266 |
| H | 1.8092882  | -4.4701514 | -1.7958816 |
| H | 1.0701372  | -3.9207674 | -3.2822096 |
| H | -1.9508878 | 2.6160806  | -1.9233556 |
| H | -1.4713348 | 3.5542686  | -3.3508266 |
| H | -0.6159018 | 2.0681026  | -2.9654316 |
| H | 1.7963392  | 4.7546066  | -1.8699446 |
| H | 0.8528542  | 4.6929676  | -3.3745266 |
| H | 1.6675322  | 3.2382266  | -2.7890856 |
| H | -1.1474728 | 5.6318326  | -2.1854356 |
| H | -1.7740418 | 4.8526916  | -0.7190776 |
| H | -0.2171598 | 5.7227096  | -0.6814926 |
| H | 5.6865272  | 0.7679436  | 2.9568294  |
| H | 8.0132742  | -0.5522864 | -0.4024746 |
| H | 6.2192742  | 0.1694736  | -1.9249146 |

|   |            |            |            |
|---|------------|------------|------------|
| H | 3.8784802  | 1.5184276  | 1.3975344  |
| H | 4.2182092  | 1.3223176  | -2.3517246 |
| H | 3.5614112  | 2.3938896  | -1.0968636 |
| H | 9.6571822  | -1.1189644 | 2.7486714  |
| H | 9.6307062  | -0.2121194 | 1.2126104  |
| H | 8.8737942  | -1.8281374 | 1.3110054  |
| P | -2.9527298 | -4.0920724 | 0.2066484  |
| C | -3.4355628 | -3.1355544 | 1.6868064  |
| H | -3.8079818 | -2.1561204 | 1.3713464  |
| H | -4.2296278 | -3.6530204 | 2.2386374  |
| H | -2.5649318 | -2.9987644 | 2.3375664  |
| C | -2.5989608 | -5.7549414 | 0.8896674  |
| H | -3.4546638 | -6.1309984 | 1.4633954  |
| H | -2.3784258 | -6.4493424 | 0.0728034  |
| H | -1.7200978 | -5.7016004 | 1.5402064  |
| C | -4.5288968 | -4.3330244 | -0.6839356 |
| H | -5.2581698 | -4.8115634 | -0.0182736 |
| H | -4.9134228 | -3.3596944 | -1.0041056 |
| H | -4.3685968 | -4.9664424 | -1.5614526 |
| H | -3.6645558 | 0.3896826  | 1.4671814  |
| C | -4.3084828 | 3.2013326  | -0.0733616 |
| F | -3.0462898 | 2.9482126  | 0.2854014  |
| F | -4.5102698 | 4.5047106  | -0.0137076 |
| F | -4.4799448 | 2.7810776  | -1.3173446 |
| S | -5.4557448 | 2.3253736  | 1.0797384  |

|   |            |            |            |
|---|------------|------------|------------|
| O | -6.7956088 | 2.6836596  | 0.6681174  |
| O | -4.9442018 | 2.6387526  | 2.3995534  |
| N | -5.0273848 | 0.7727256  | 0.7703964  |
| S | -5.7152548 | -0.1547034 | -0.3726226 |
| O | -6.4504258 | 0.5478356  | -1.4033666 |
| O | -4.7102828 | -1.1564094 | -0.7365446 |
| C | -6.9600518 | -1.1232324 | 0.5791414  |
| F | -6.3578278 | -1.7971724 | 1.5518564  |
| F | -7.8695408 | -0.3231204 | 1.0941964  |
| F | -7.5308458 | -1.9870814 | -0.2473896 |

Zero-point correction= 0.702720 (Hartree/Particle)

Thermal correction to Energy= 0.758639

Thermal correction to Enthalpy= 0.759583

Thermal correction to Gibbs Free Energy= 0.611670

Sum of electronic and zero-point Energies= -3916.921283

Sum of electronic and thermal Energies= -3916.865364

Sum of electronic and thermal Enthalpies= -3916.864420

Sum of electronic and thermal Free Energies= -3917.012333

### **E-ts2**

|   |            |           |           |
|---|------------|-----------|-----------|
| C | -2.4165648 | 1.6912984 | 2.7037620 |
| C | -1.2772628 | 1.8366834 | 3.4965630 |
| C | -0.0482728 | 1.4291534 | 3.0084910 |
| C | 0.0484172  | 0.8777044 | 1.7228970 |
| C | -1.0917508 | 0.7418464 | 0.9190550 |
| C | -2.3240738 | 1.1495144 | 1.4293970 |

|    |            |            |            |
|----|------------|------------|------------|
| C  | 1.3395182  | 0.4743854  | 1.1900700  |
| C  | 1.4880882  | 0.1092974  | -0.1405690 |
| C  | 0.3773532  | -0.1560506 | -0.9344370 |
| C  | -1.0327318 | 0.0477064  | -0.4302860 |
| C  | -1.8408078 | 0.7718924  | -1.5082820 |
| C  | -2.9894858 | -0.0821446 | -1.8769010 |
| N  | -2.8432058 | -1.3052886 | -1.2208990 |
| C  | -1.7754568 | -1.3134846 | -0.2441870 |
| C  | -1.5040238 | 1.9849614  | -2.0033930 |
| N  | 0.3571862  | -2.2863466 | -1.0664430 |
| C  | -0.9066948 | -2.5483986 | -0.4341860 |
| O  | -1.2928908 | -3.6430276 | -0.1065400 |
| O  | -3.9435358 | 0.1621834  | -2.5973340 |
| O  | 2.3542412  | 0.5723804  | 2.0067020  |
| Au | 0.2473562  | 2.9285904  | -1.3687480 |
| C  | -2.3154338 | 2.6695174  | -3.0572090 |
| C  | -5.0865218 | -1.8914036 | 2.6472060  |
| C  | -5.8791028 | -0.7406176 | 2.6246800  |
| C  | -6.1116858 | -0.0823766 | 1.4146430  |
| C  | -5.5414728 | -0.5763556 | 0.2441860  |
| C  | -4.7408188 | -1.7186916 | 0.2545430  |
| C  | -4.5270608 | -2.3709096 | 1.4735790  |
| C  | -4.0209128 | -2.1466066 | -0.9957370 |
| O  | -6.3743938 | -0.3421156 | 3.8218610  |
| C  | -7.1901878 | 0.8023094  | 3.8474620  |

|   |            |            |            |
|---|------------|------------|------------|
| H | -3.3900018 | 1.9965814  | 3.0817270  |
| H | -1.3542058 | 2.2609924  | 4.4940860  |
| H | 0.8534192  | 1.5224394  | 3.6076770  |
| H | -3.2232788 | 1.0355744  | 0.8244600  |
| H | 2.4875432  | -0.0343776 | -0.5414890 |
| H | 3.1863282  | 0.1789234  | 1.5902130  |
| H | -3.1851788 | 2.0945834  | -3.3866150 |
| H | -2.6527298 | 3.6435364  | -2.6775540 |
| H | -1.6792208 | 2.9006064  | -3.9220370 |
| H | -4.9251658 | -2.3874366 | 3.6008190  |
| H | -6.7360568 | 0.8053614  | 1.3703050  |
| H | -5.7079898 | -0.0570066 | -0.6990590 |
| H | -3.9017068 | -3.2638636 | 1.4975630  |
| H | -4.6469058 | -2.0226476 | -1.8853880 |
| H | -3.6998578 | -3.1934666 | -0.9347360 |
| H | -7.4852528 | 0.9515024  | 4.8880410  |
| H | -8.0936608 | 0.6731744  | 3.2344800  |
| H | -6.6516188 | 1.6956344  | 3.4972760  |
| P | 2.3706072  | 3.8510324  | -0.7139530 |
| C | 2.7115012  | 3.9163934  | 1.0795730  |
| H | 2.7505992  | 2.8995604  | 1.4854560  |
| H | 3.6847752  | 4.3873874  | 1.2609100  |
| H | 1.9218342  | 4.4772004  | 1.5893590  |
| C | 2.6969492  | 5.5600864  | -1.2807210 |
| H | 3.7011522  | 5.8809114  | -0.9792510 |



|   |            |            |            |
|---|------------|------------|------------|
| H | 2.6138382  | 5.6065494  | -2.3710490 |
| H | 1.9547412  | 6.2390964  | -0.8498080 |
| C | 3.7803902  | 2.8992104  | -1.3803880 |
| H | 4.7311182  | 3.3620834  | -1.0925490 |
| H | 3.7665222  | 1.8879634  | -0.9580820 |
| H | 3.7033852  | 2.8380474  | -2.4704450 |
| C | 5.2454482  | -1.9785366 | -1.3195020 |
| F | 4.7414152  | -0.9282966 | -1.9644120 |
| F | 4.8375942  | -3.0871166 | -1.9280740 |
| F | 6.5545622  | -1.9271026 | -1.3472770 |
| S | 4.5844012  | -2.0215546 | 0.4169040  |
| O | 5.4931972  | -2.8763266 | 1.1536090  |
| O | 3.1855902  | -2.4169636 | 0.2347670  |
| H | -2.2018388 | -1.3953786 | 0.7695810  |
| H | 0.4933572  | -0.1389766 | -2.0136310 |
| H | 1.1360482  | -2.4718336 | -0.4198590 |
| C | 0.6292032  | -3.0349996 | -2.3517450 |
| C | -0.6197508 | -3.0136316 | -3.2193010 |
| C | 1.7659142  | -2.3035936 | -3.0534580 |
| C | 1.0631452  | -4.4590746 | -2.0206170 |
| H | -1.4364848 | -3.6042036 | -2.7886880 |
| H | -0.9787718 | -1.9882276 | -3.3783190 |
| H | -0.3805948 | -3.4422606 | -4.1988330 |
| H | 2.6152302  | -2.1641456 | -2.3790740 |
| H | 2.1098702  | -2.9000626 | -3.9065280 |

|   |           |            |            |
|---|-----------|------------|------------|
| H | 1.4523832 | -1.3267236 | -3.4401790 |
| H | 1.2461262 | -5.0140026 | -2.9490620 |
| H | 1.9968532 | -4.4472606 | -1.4429480 |
| H | 0.2963562 | -4.9838296 | -1.4430800 |
| N | 4.5289212 | -0.4679296 | 0.8833100  |
| S | 5.8274682 | 0.4562394  | 1.2269370  |
| O | 7.0374722 | 0.0589694  | 0.5320280  |
| O | 5.3491592 | 1.8323944  | 1.1916270  |
| C | 6.1252522 | 0.1422364  | 3.0216460  |
| F | 5.0014512 | 0.3590184  | 3.6923740  |
| F | 6.5272622 | -1.0946586 | 3.2230740  |
| F | 7.0540792 | 0.9865944  | 3.4399650  |

Zero-point correction= 0.701269 (Hartree/Particle)

Thermal correction to Energy= 0.756895

Thermal correction to Enthalpy= 0.757840

Thermal correction to Gibbs Free Energy= 0.609874

Sum of electronic and zero-point Energies= -3916.905245

Sum of electronic and thermal Energies= -3916.849619

Sum of electronic and thermal Enthalpies= -3916.848675

Sum of electronic and thermal Free Energies= -3916.996640

### **E-int2**

|   |            |            |            |
|---|------------|------------|------------|
| C | -2.6741061 | -0.7736924 | -3.0183513 |
| C | -1.5750251 | -0.7873144 | -3.8720633 |
| C | -0.3030651 | -0.5844044 | -3.3565673 |
| C | -0.1211191 | -0.3718504 | -1.9869623 |

|    |            |            |            |
|----|------------|------------|------------|
| C  | -1.2221831 | -0.3765804 | -1.1214113 |
| C  | -2.4954531 | -0.5725054 | -1.6549373 |
| C  | 1.2187329  | -0.1569114 | -1.4403873 |
| C  | 1.4446169  | -0.0557374 | -0.1167323 |
| C  | 0.3670159  | 0.0472756  | 0.8816217  |
| C  | -1.0915071 | -0.0754434 | 0.3659567  |
| C  | -1.8894501 | -1.0635014 | 1.2202217  |
| C  | -3.0364041 | -0.3370714 | 1.8074077  |
| N  | -2.8476451 | 1.0285046  | 1.5597157  |
| C  | -1.7631021 | 1.2852006  | 0.6432037  |
| C  | -1.5549891 | -2.3633544 | 1.3887487  |
| N  | 0.5070719  | 1.4250436  | 1.5881917  |
| C  | -0.7466761 | 2.2017546  | 1.2728077  |
| O  | -0.8441561 | 3.3669496  | 1.5050117  |
| O  | -4.0096911 | -0.7534374 | 2.4126567  |
| O  | 2.2026619  | -0.1273324 | -2.3472223 |
| Au | 0.2091379  | -3.1217354 | 0.5519487  |
| C  | -2.3780571 | -3.2973354 | 2.2193677  |
| C  | -5.0080751 | 2.9462256  | -1.9017323 |
| C  | -5.8645831 | 1.8963386  | -2.2448043 |
| C  | -6.1499971 | 0.8991906  | -1.3085503 |
| C  | -5.5674181 | 0.9566106  | -0.0459553 |
| C  | -4.7038351 | 1.9940406  | 0.3058807  |
| C  | -4.4381201 | 2.9897976  | -0.6396073 |
| C  | -3.9789481 | 1.9548556  | 1.6220147  |

|   |            |            |            |
|---|------------|------------|------------|
| O | -6.3673681 | 1.9339596  | -3.5015043 |
| C | -7.2301011 | 0.8964576  | -3.8975173 |
| H | -3.6785841 | -0.9185134 | -3.4106263 |
| H | -1.7099251 | -0.9474624 | -4.9388373 |
| H | 0.5686529  | -0.5757624 | -4.0051383 |
| H | -3.3660621 | -0.5629244 | -0.9989443 |
| H | 2.4654969  | 0.0363596  | 0.2410787  |
| H | 3.0194479  | 0.1931086  | -1.9051323 |
| H | -3.2435211 | -2.8244224 | 2.6920507  |
| H | -2.7294561 | -4.1235794 | 1.5862547  |
| H | -1.7493341 | -3.7691374 | 2.9860917  |
| H | -4.8070351 | 3.7116236  | -2.6466613 |
| H | -6.8226981 | 0.0810976  | -1.5492083 |
| H | -5.7730741 | 0.1714376  | 0.6811067  |
| H | -3.7677431 | 3.8100116  | -0.3776463 |
| H | -4.6210641 | 1.5833516  | 2.4274717  |
| H | -3.6068551 | 2.9479416  | 1.9051467  |
| H | -7.5150801 | 1.1062366  | -4.9303283 |
| H | -8.1367351 | 0.8606426  | -3.2767693 |
| H | -6.7333901 | -0.0840954 | -3.8557563 |
| P | 2.3520329  | -3.7785094 | -0.3175593 |
| C | 2.6143279  | -3.4865984 | -2.1000513 |
| H | 2.4568719  | -2.4269884 | -2.3308983 |
| H | 3.6421359  | -3.7514384 | -2.3760353 |
| H | 1.9057159  | -4.0861864 | -2.6802363 |

|   |            |            |            |
|---|------------|------------|------------|
| C | 2.8104419  | -5.5366384 | -0.0931403 |
| H | 3.8142399  | -5.7262654 | -0.4916063 |
| H | 2.7906879  | -5.7880554 | 0.9719227  |
| H | 2.0886359  | -6.1754214 | -0.6114223 |
| C | 3.7326379  | -2.8780584 | 0.4727497  |
| H | 4.6950679  | -3.2349214 | 0.0882077  |
| H | 3.6581259  | -1.8121234 | 0.2300027  |
| H | 3.6887179  | -3.0087154 | 1.5589727  |
| C | 5.3329799  | 1.6556826  | 1.7221807  |
| F | 5.1047159  | 0.3627396  | 1.9449587  |
| F | 4.8124859  | 2.3487306  | 2.7326607  |
| F | 6.6215929  | 1.8801736  | 1.6705637  |
| S | 4.4652219  | 2.1956386  | 0.1562747  |
| O | 5.2288989  | 3.3265116  | -0.3316553 |
| O | 3.0863189  | 2.4175576  | 0.6187407  |
| H | -2.1280551 | 1.7768256  | -0.2741223 |
| H | 0.4980999  | -0.6836164 | 1.6817717  |
| H | 1.3119899  | 1.9171666  | 1.1448907  |
| C | 0.8609939  | 1.3815626  | 3.1137327  |
| C | -0.3561961 | 0.9064466  | 3.8834977  |
| C | 2.0354279  | 0.4274946  | 3.2880707  |
| C | 1.2885309  | 2.7853986  | 3.5177097  |
| H | -1.2043341 | 1.5953096  | 3.7906767  |
| H | -0.6806151 | -0.0936464 | 3.5687147  |
| H | -0.0891781 | 0.8504276  | 4.9445157  |

|   |           |            |            |
|---|-----------|------------|------------|
| H | 2.8566429 | 0.6724906  | 2.6101627  |
| H | 2.4093859 | 0.5427546  | 4.3113987  |
| H | 1.7654049 | -0.6266314 | 3.1595407  |
| H | 1.5905669 | 2.7578276  | 4.5705367  |
| H | 2.1509309 | 3.1170156  | 2.9271917  |
| H | 0.4834969 | 3.5156586  | 3.4124697  |
| N | 4.4084829 | 0.8938626  | -0.7966433 |
| S | 5.7354109 | 0.1794206  | -1.4144083 |
| O | 6.9522049 | 0.4317636  | -0.6612513 |
| O | 5.3366069 | -1.1763704 | -1.7687803 |
| C | 5.9577079 | 1.0176756  | -3.0432433 |
| F | 4.8366339 | 0.9178016  | -3.7444693 |
| F | 6.2614169 | 2.2883856  | -2.8769843 |
| F | 6.9353859 | 0.4079506  | -3.6942143 |

Zero-point correction= 0.704801 (Hartree/Particle)

Thermal correction to Energy= 0.760161

Thermal correction to Enthalpy= 0.761105

Thermal correction to Gibbs Free Energy= 0.614012

Sum of electronic and zero-point Energies= -3916.917201

Sum of electronic and thermal Energies= -3916.861840

Sum of electronic and thermal Enthalpies= -3916.860896

Sum of electronic and thermal Free Energies= -3917.007989

### **E-ts3**

|   |           |            |           |
|---|-----------|------------|-----------|
| C | 1.8327328 | -2.3176629 | 2.5689504 |
| C | 0.6292778 | -2.3272679 | 3.2751614 |

|    |            |            |            |
|----|------------|------------|------------|
| C  | -0.4403082 | -1.5879639 | 2.8052574  |
| C  | -0.3214972 | -0.8414449 | 1.6225494  |
| C  | 0.8812638  | -0.8407579 | 0.9021284  |
| C  | 1.9547968  | -1.5803009 | 1.4007694  |
| C  | -1.4767392 | -0.1165169 | 1.1097254  |
| C  | -1.4066012 | 0.6495391  | -0.0485746 |
| C  | -0.1519992 | 0.7227341  | -0.8840036 |
| C  | 1.0958048  | -0.0402399 | -0.3655006 |
| C  | 1.7032608  | -0.8724059 | -1.4931316 |
| C  | 2.9494578  | -0.2024949 | -1.9297126 |
| N  | 3.0615948  | 0.9885051  | -1.2092596 |
| C  | 2.1454878  | 1.0585591  | -0.0938106 |
| C  | 1.1274848  | -1.9797839 | -2.0102586 |
| N  | 0.1190678  | 2.2170481  | -0.6983516 |
| C  | 1.4366998  | 2.3906501  | -0.1310966 |
| O  | 1.8970108  | 3.4456401  | 0.2189384  |
| O  | 3.7791978  | -0.5460129 | -2.7551846 |
| O  | -2.5605412 | -0.2171159 | 1.8239724  |
| Au | -0.7140352 | -2.6785599 | -1.3176906 |
| C  | 1.7443968  | -2.7433789 | -3.1409776 |
| C  | 6.0104498  | 1.6629881  | 2.2467934  |
| C  | 6.6718918  | 0.4325361  | 2.2110434  |
| C  | 6.5782578  | -0.3734029 | 1.0738034  |
| C  | 5.8300368  | 0.0629701  | -0.0158456 |
| C  | 5.1732908  | 1.2926531  | 0.0049654  |

|   |            |            |            |
|---|------------|------------|------------|
| C | 5.2690698  | 2.0828051  | 1.1543354  |
| C | 4.3252748  | 1.7164531  | -1.1625356 |
| O | 7.3738128  | 0.1084731  | 3.3241814  |
| C | 8.0744358  | -1.1103479 | 3.3279304  |
| H | 2.6824808  | -2.8903279 | 2.9326304  |
| H | 0.5342258  | -2.9041109 | 4.1911454  |
| H | -1.3857562 | -1.5706499 | 3.3403604  |
| H | 2.8971198  | -1.5828759 | 0.8533814  |
| H | -2.3446292 | 0.9092851  | -0.5353936 |
| H | -3.3794252 | 0.2074921  | 1.4017074  |
| H | 2.6806428  | -2.3117869 | -3.5055916 |
| H | 1.9270668  | -3.7789169 | -2.8230046 |
| H | 1.0287868  | -2.8176459 | -3.9708456 |
| H | 6.0965938  | 2.2681491  | 3.1456184  |
| H | 7.0882668  | -1.3310359 | 1.0229844  |
| H | 5.7555908  | -0.5602079 | -0.9071536 |
| H | 4.7459998  | 3.0388211  | 1.1886684  |
| H | 4.8197108  | 1.5003381  | -2.1160256 |
| H | 4.1155168  | 2.7930421  | -1.1167656 |
| H | 8.5756388  | -1.1784069 | 4.2955724  |
| H | 8.8300638  | -1.1479739 | 2.5301464  |
| H | 7.3979388  | -1.9701079 | 3.2149874  |
| P | -2.8827432 | -3.4489619 | -0.6319776 |
| C | -3.1497032 | -3.6390909 | 1.1630444  |
| H | -3.1107912 | -2.6554509 | 1.6430384  |



|   |            |            |            |
|---|------------|------------|------------|
| H | -4.1413522 | -4.0635739 | 1.3560614  |
| H | -2.3705722 | -4.2848079 | 1.5811574  |
| C | -3.3203062 | -5.0911589 | -1.3108926 |
| H | -4.3318582 | -5.3770469 | -0.9989076 |
| H | -3.2730312 | -5.0612389 | -2.4039596 |
| H | -2.6058642 | -5.8398619 | -0.9547336 |
| C | -4.2448342 | -2.3715299 | -1.1919806 |
| H | -5.2138632 | -2.7712649 | -0.8714366 |
| H | -4.1217662 | -1.3784589 | -0.7470526 |
| H | -4.2120202 | -2.2782929 | -2.2823776 |
| C | -5.2183952 | 1.4240901  | -1.7747836 |
| F | -4.0930942 | 0.7878811  | -2.1205186 |
| F | -5.3553552 | 2.4805021  | -2.5586436 |
| F | -6.2336242 | 0.6022041  | -1.9420456 |
| S | -5.1071512 | 1.9952621  | -0.0213606 |
| O | -6.3619322 | 2.6661961  | 0.2458174  |
| O | -3.8428202 | 2.7255011  | 0.0217304  |
| H | 2.6759178  | 0.9519931  | 0.8659114  |
| H | -0.3072842 | 0.4901841  | -1.9406496 |
| H | -0.8481982 | 1.9745021  | 0.1577674  |
| C | -0.2962852 | 3.2253631  | -1.7841916 |
| C | 0.8252858  | 3.2952011  | -2.8120136 |
| C | -1.5891952 | 2.7778531  | -2.4518546 |
| C | -0.5464652 | 4.5634971  | -1.1010226 |
| H | 1.7523578  | 3.6924291  | -2.3857656 |

|   |            |            |            |
|---|------------|------------|------------|
| H | 1.0328058  | 2.3085751  | -3.2463916 |
| H | 0.5214688  | 3.9619781  | -3.6267366 |
| H | -2.4285672 | 2.7577701  | -1.7503376 |
| H | -1.8292032 | 3.5209921  | -3.2205966 |
| H | -1.5085272 | 1.8109591  | -2.9602236 |
| H | -0.8495422 | 5.2922471  | -1.8616826 |
| H | -1.3688772 | 4.4716471  | -0.3803196 |
| H | 0.3411448  | 4.9397521  | -0.5891536 |
| N | -4.8554552 | 0.6025221  | 0.7740284  |
| S | -6.0545542 | -0.3331189 | 1.3771764  |
| O | -7.3232122 | -0.2221919 | 0.6848624  |
| O | -5.4544722 | -1.6360899 | 1.6321034  |
| C | -6.2983022 | 0.3817861  | 3.0602454  |
| F | -5.1467592 | 0.3462121  | 3.7172604  |
| F | -6.7195342 | 1.6283951  | 2.9821094  |
| F | -7.1916362 | -0.3523369 | 3.7023054  |

Zero-point correction= 0.698665 (Hartree/Particle)

Thermal correction to Energy= 0.753855

Thermal correction to Enthalpy= 0.754799

Thermal correction to Gibbs Free Energy= 0.606340

Sum of electronic and zero-point Energies= -3916.886753

Sum of electronic and thermal Energies= -3916.831564

Sum of electronic and thermal Enthalpies= -3916.830620

Sum of electronic and thermal Free Energies= -3916.979078

**E-int3**

|    |            |            |            |
|----|------------|------------|------------|
| C  | -2.3030688 | 2.5741769  | -1.7996096 |
| C  | -1.0755838 | 3.1394319  | -2.1569046 |
| C  | 0.0898712  | 2.5697379  | -1.6837606 |
| C  | 0.0376892  | 1.4358509  | -0.8566086 |
| C  | -1.1899568 | 0.8317749  | -0.5381326 |
| C  | -2.3589718 | 1.4326039  | -1.0152506 |
| C  | 1.2742292  | 0.9503859  | -0.2483906 |
| C  | 1.1242572  | 0.0672509  | 0.9524924  |
| C  | 0.0558592  | -1.0114931 | 0.7609044  |
| C  | -1.2867658 | -0.4612171 | 0.2408294  |
| C  | -2.0666248 | -1.5047541 | -0.5758056 |
| C  | -3.4216878 | -1.6196921 | 0.0337914  |
| N  | -3.4004568 | -0.9168611 | 1.2195534  |
| C  | -2.1292348 | -0.3063931 | 1.5196134  |
| C  | -1.6203178 | -2.1129921 | -1.6930306 |
| N  | -0.2915848 | -1.6726581 | 2.0134464  |
| C  | -1.4084688 | -1.1268211 | 2.5856774  |
| O  | -1.8245278 | -1.2899791 | 3.7192934  |
| O  | -4.4253528 | -2.1729591 | -0.3937956 |
| O  | 2.3828602  | 1.3175769  | -0.6572526 |
| Au | 0.2775182  | -1.7367611 | -2.4760026 |
| C  | -2.4493418 | -3.1076651 | -2.4493536 |
| C  | -5.1771178 | 3.1772289  | 1.6099224  |
| C  | -5.8530608 | 3.2446069  | 0.3892494  |
| C  | -6.1775038 | 2.0676359  | -0.2895236 |

|   |            |            |            |
|---|------------|------------|------------|
| C | -5.8138398 | 0.8390319  | 0.2560734  |
| C | -5.1296068 | 0.7581469  | 1.4688584  |
| C | -4.8232658 | 1.9458429  | 2.1391834  |
| C | -4.6110298 | -0.5714811 | 1.9473564  |
| O | -6.1515258 | 4.4928539  | -0.0526876 |
| C | -6.8583868 | 4.6082829  | -1.2611396 |
| H | -3.2330878 | 3.0259379  | -2.1392416 |
| H | -1.0405258 | 4.0278469  | -2.7818986 |
| H | 1.0635702  | 3.0022329  | -1.9031386 |
| H | -3.3303478 | 1.0032969  | -0.7720646 |
| H | 2.0999922  | -0.3617971 | 1.2116874  |
| H | 3.8612472  | 1.1425679  | 0.0451834  |
| H | -3.4255698 | -3.2941661 | -1.9936786 |
| H | -2.6023048 | -2.7522361 | -3.4777506 |
| H | -1.9012288 | -4.0545741 | -2.5445966 |
| H | -4.9442818 | 4.1076999  | 2.1215734  |
| H | -6.7141728 | 2.0944059  | -1.2336506 |
| H | -6.0418558 | -0.0819621 | -0.2799826 |
| H | -4.2975508 | 1.9006139  | 3.0934504  |
| H | -5.3301898 | -1.3746751 | 1.7533564  |
| H | -4.3766158 | -0.5620571 | 3.0187324  |
| H | -7.0091518 | 5.6759549  | -1.4339916 |
| H | -7.8384698 | 4.1123549  | -1.2101866 |
| H | -6.2953108 | 4.1864269  | -2.1073506 |
| P | 2.5267432  | -1.3361031 | -3.2153176 |

|   |            |            |            |
|---|------------|------------|------------|
| C | 2.9103682  | 0.3486369  | -3.8042256 |
| H | 2.6744442  | 1.0613329  | -3.0066436 |
| H | 3.9749782  | 0.4386229  | -4.0489036 |
| H | 2.2997422  | 0.5746049  | -4.6839106 |
| C | 3.1616952  | -2.4195201 | -4.5465976 |
| H | 4.2151402  | -2.1976281 | -4.7548676 |
| H | 3.0635962  | -3.4668731 | -4.2444986 |
| H | 2.5734152  | -2.2679001 | -5.4567736 |
| C | 3.7114062  | -1.6137121 | -1.8480396 |
| H | 4.7386862  | -1.4014741 | -2.1669826 |
| H | 3.4556512  | -0.9416451 | -1.0207376 |
| H | 3.6284072  | -2.6495461 | -1.5011826 |
| C | 5.4456972  | -0.9127481 | 2.0914274  |
| F | 4.4824172  | -1.5860951 | 1.4763714  |
| F | 5.5044022  | -1.2792581 | 3.3550704  |
| F | 6.5932172  | -1.1363341 | 1.4913774  |
| S | 5.0434742  | 0.8892489  | 2.0385014  |
| O | 6.1911652  | 1.6015919  | 2.5383244  |
| O | 3.7103912  | 1.0133149  | 2.5897604  |
| H | -2.2584398 | 0.7372049  | 1.8477784  |
| H | 0.4371062  | -1.7447661 | 0.0419834  |
| C | 0.5838762  | -2.6612921 | 2.6954704  |
| C | -0.2833798 | -3.7641891 | 3.3026914  |
| C | 1.5031842  | -3.3121851 | 1.6652134  |
| C | 1.3954942  | -1.9688671 | 3.7894044  |

|   |            |            |            |
|---|------------|------------|------------|
| H | -0.9407798 | -3.3741491 | 4.0817264  |
| H | -0.9006338 | -4.2326081 | 2.5267294  |
| H | 0.3660342  | -4.5333241 | 3.7376874  |
| H | 2.1878612  | -2.6025581 | 1.1870264  |
| H | 2.1169902  | -4.0661621 | 2.1707854  |
| H | 0.9225602  | -3.8168981 | 0.8815044  |
| H | 2.0194932  | -2.7020381 | 4.3159864  |
| H | 2.0572222  | -1.1932081 | 3.3835754  |
| H | 0.7236872  | -1.5039661 | 4.5186574  |
| N | 4.8598482  | 1.1015949  | 0.3888714  |
| S | 6.0279982  | 1.5273589  | -0.7312496 |
| O | 7.3335422  | 1.1470139  | -0.2538816 |
| O | 5.5026652  | 1.1390419  | -2.0230426 |
| C | 5.9117352  | 3.3700539  | -0.6737606 |
| F | 4.6760842  | 3.7224329  | -0.9782696 |
| F | 6.2178732  | 3.7958159  | 0.5321864  |
| F | 6.7546292  | 3.8591139  | -1.5611546 |
| H | 0.8411592  | 0.7195039  | 1.7964844  |

Zero-point correction= 0.703422 (Hartree/Particle)

Thermal correction to Energy= 0.759208

Thermal correction to Enthalpy= 0.760152

Thermal correction to Gibbs Free Energy= 0.610668

Sum of electronic and zero-point Energies= -3916.957492

Sum of electronic and thermal Energies= -3916.901707

Sum of electronic and thermal Enthalpies= -3916.900763

Sum of electronic and thermal Free Energies= -3917.050246

**E-int4**

|    |            |            |            |
|----|------------|------------|------------|
| C  | 0.6801995  | 2.4683091  | -2.0101624 |
| C  | 0.2880435  | 1.9240161  | -3.2341844 |
| C  | 0.1694345  | 0.5511461  | -3.3542874 |
| C  | 0.4771575  | -0.2803719 | -2.2704294 |
| C  | 0.8768565  | 0.2579721  | -1.0367104 |
| C  | 0.9551045  | 1.6494251  | -0.9238544 |
| C  | 0.4345085  | -1.7404959 | -2.4645884 |
| C  | 1.3444415  | -2.5159729 | -1.5527544 |
| C  | 1.1224295  | -2.1302379 | -0.0888424 |
| C  | 1.2142145  | -0.6092289 | 0.1619416  |
| C  | 0.4301105  | -0.1815929 | 1.4099106  |
| C  | 1.3655995  | 0.5620741  | 2.2987046  |
| N  | 2.6299055  | 0.4208491  | 1.7746746  |
| C  | 2.6810175  | -0.4214669 | 0.6051546  |
| C  | -0.8842835 | -0.3698679 | 1.6381956  |
| N  | 2.1394365  | -2.6939559 | 0.7904366  |
| C  | 3.1615635  | -1.8126169 | 1.0144336  |
| O  | 4.2492395  | -2.0428179 | 1.5141696  |
| O  | 1.1104935  | 1.2351191  | 3.2872676  |
| O  | -0.2511945 | -2.2778779 | -3.3242334 |
| Au | -2.0717745 | -1.3095929 | 0.1970906  |
| C  | -1.5268675 | 0.0835181  | 2.9220186  |
| C  | 4.5784805  | 3.6777311  | -0.6210264 |

|   |            |            |            |
|---|------------|------------|------------|
| C | 3.6531265  | 4.6963121  | -0.3810924 |
| C | 2.8128165  | 4.6218191  | 0.7322916  |
| C | 2.8993505  | 3.5239251  | 1.5834336  |
| C | 3.8073865  | 2.4917981  | 1.3463986  |
| C | 4.6498925  | 2.5900541  | 0.2357636  |
| C | 3.7520715  | 1.2471421  | 2.1913906  |
| O | 3.6446425  | 5.7113151  | -1.2822944 |
| C | 2.7292935  | 6.7581291  | -1.0799534 |
| H | 0.7692375  | 3.5471111  | -1.8918874 |
| H | 0.0716865  | 2.5729561  | -4.0794714 |
| H | -0.1334085 | 0.0838231  | -4.2893654 |
| H | 1.2407825  | 2.1077611  | 0.0221806  |
| H | 1.1929605  | -3.5886839 | -1.7206994 |
| H | -3.0071715 | 0.8197351  | 0.8684346  |
| H | -0.8389085 | 0.0462781  | 3.7721136  |
| H | -1.8334475 | 1.1383111  | 2.8445886  |
| H | -2.4244985 | -0.5037149 | 3.1503966  |
| H | 5.2263055  | 3.7645971  | -1.4896704 |
| H | 2.0918845  | 5.4058151  | 0.9452706  |
| H | 2.2274435  | 3.4471491  | 2.4379246  |
| H | 5.3724325  | 1.7971181  | 0.0402176  |
| H | 3.5851315  | 1.4881291  | 3.2470696  |
| H | 4.6679135  | 0.6491621  | 2.1115446  |
| H | 2.8760165  | 7.4638661  | -1.9003124 |
| H | 2.9056335  | 7.2768801  | -0.1266334 |



|   |            |            |            |
|---|------------|------------|------------|
| H | 1.6888075  | 6.4004491  | -1.0978424 |
| P | -3.3564755 | -2.4181019 | -1.5001994 |
| C | -3.4570455 | -1.5209869 | -3.0881064 |
| H | -2.4382725 | -1.3965369 | -3.4777124 |
| H | -4.0578665 | -2.0865889 | -3.8104194 |
| H | -3.9093205 | -0.5369949 | -2.9269914 |
| C | -5.0941085 | -2.7769499 | -1.0660644 |
| H | -5.5983425 | -3.3009469 | -1.8867824 |
| H | -5.1211755 | -3.3968859 | -0.1642474 |
| H | -5.6166175 | -1.8421379 | -0.8422194 |
| C | -2.6658775 | -4.0461599 | -1.9635914 |
| H | -3.3086935 | -4.5454239 | -2.6986334 |
| H | -1.6723345 | -3.8906229 | -2.4009484 |
| H | -2.5774245 | -4.6743829 | -1.0709284 |
| C | -5.5256325 | 1.8641811  | 2.7192836  |
| F | -4.6658045 | 1.3025281  | 3.5443846  |
| F | -6.7598225 | 1.5967501  | 3.0966926  |
| F | -5.3305985 | 3.1633551  | 2.6731986  |
| S | -5.2940465 | 1.1530741  | 1.0279196  |
| O | -6.1779995 | 1.8609761  | 0.1364436  |
| O | -5.2911895 | -0.2878099 | 1.1729786  |
| H | 3.3295115  | 0.0144641  | -0.1704084 |
| H | 0.1301945  | -2.4847549 | 0.2119686  |
| C | 2.1714305  | -4.1112329 | 1.2341866  |
| C | 2.5091325  | -4.1502609 | 2.7243436  |

|   |            |            |            |
|---|------------|------------|------------|
| C | 0.7917805  | -4.7383019 | 1.0504336  |
| C | 3.2178945  | -4.8798759 | 0.4299996  |
| H | 3.5026775  | -3.7406959 | 2.9172746  |
| H | 1.7732315  | -3.5687559 | 3.2932166  |
| H | 2.4795205  | -5.1876719 | 3.0786556  |
| H | 0.4731125  | -4.7793329 | 0.0010816  |
| H | 0.8275865  | -5.7693879 | 1.4196756  |
| H | 0.0284125  | -4.2009239 | 1.6291176  |
| H | 3.2728835  | -5.9189779 | 0.7778476  |
| H | 2.9683555  | -4.8939839 | -0.6383504 |
| H | 4.2031855  | -4.4201649 | 0.5550656  |
| N | -3.6956515 | 1.5831731  | 0.7400666  |
| S | -3.0954185 | 2.9662891  | -0.0087694 |
| O | -4.0530075 | 4.0341531  | 0.1232626  |
| O | -1.7083435 | 3.0573591  | 0.3780726  |
| C | -3.1023775 | 2.4088781  | -1.7723934 |
| F | -2.4006595 | 1.2946341  | -1.8640214 |
| F | -4.3382815 | 2.1828921  | -2.1730764 |
| F | -2.5523325 | 3.3572931  | -2.5037844 |
| H | 2.3843145  | -2.2764499 | -1.8302434 |

Zero-point correction= 0.703069 (Hartree/Particle)

Thermal correction to Energy= 0.758744

Thermal correction to Enthalpy= 0.759688

Thermal correction to Gibbs Free Energy= 0.611341

Sum of electronic and zero-point Energies= -3916.951998

Sum of electronic and thermal Energies= -3916.896323

Sum of electronic and thermal Enthalpies= -3916.895379

Sum of electronic and thermal Free Energies= -3917.043726

**E-ts4**

|    |            |            |            |
|----|------------|------------|------------|
| C  | -0.0185577 | -2.4349889 | 2.3017001  |
| C  | -0.3358827 | -1.6991029 | 3.4425971  |
| C  | -0.1478367 | -0.3279669 | 3.4375651  |
| C  | 0.3947353  | 0.3052831  | 2.3128621  |
| C  | 0.7073623  | -0.4290629 | 1.1571631  |
| C  | 0.4694883  | -1.8035699 | 1.1657571  |
| C  | 0.7522863  | 1.7302931  | 2.4121021  |
| C  | 1.8988933  | 2.1412161  | 1.5292641  |
| C  | 1.7113303  | 1.7010391  | 0.0773671  |
| C  | 1.3311823  | 0.1992951  | -0.0764359 |
| C  | 0.5107203  | -0.0098679 | -1.3537389 |
| C  | 1.3150433  | -0.8579079 | -2.2947949 |
| N  | 2.4836323  | -1.1822929 | -1.6561609 |
| C  | 2.6884383  | -0.4640579 | -0.4197139 |
| C  | -0.7583267 | 0.3856821  | -1.6276039 |
| N  | 2.9365733  | 1.8442371  | -0.7010659 |
| C  | 3.6523443  | 0.6788091  | -0.7282359 |
| O  | 4.8195003  | 0.5224901  | -1.0375619 |
| O  | 0.9713713  | -1.3007959 | -3.3776239 |
| O  | 0.2253723  | 2.5015301  | 3.2023831  |
| Au | -1.5213687 | 1.9591891  | -0.2396229 |

|   |            |            |            |
|---|------------|------------|------------|
| C | -1.3046707 | 0.2934871  | -3.0350929 |
| C | 2.5653153  | -4.8362409 | 0.8343951  |
| C | 1.2810533  | -5.2746519 | 0.5007431  |
| C | 0.7145023  | -4.9004169 | -0.7193589 |
| C | 1.4090293  | -4.0377859 | -1.5589969 |
| C | 2.6634653  | -3.5359369 | -1.2075309 |
| C | 3.2423853  | -3.9699739 | -0.0119679 |
| C | 3.2384503  | -2.3875539 | -1.9940009 |
| O | 0.6483853  | -6.0335359 | 1.4317351  |
| C | -0.6975107 | -6.3726009 | 1.1834941  |
| H | -0.1475227 | -3.5166699 | 2.2859951  |
| H | -0.7279927 | -2.1980029 | 4.3254321  |
| H | -0.3690397 | 0.2813051  | 4.3115311  |
| H | 0.6649313  | -2.4004239 | 0.2772791  |
| H | 2.0349123  | 3.2264331  | 1.6054301  |
| H | -1.8700457 | -0.0370589 | -0.9595659 |
| H | -0.6002577 | 0.6936691  | -3.7699409 |
| H | -1.4884187 | -0.7503389 | -3.3174519 |
| H | -2.2502447 | 0.8411911  | -3.1050189 |
| H | 2.9918353  | -5.1588659 | 1.7809241  |
| H | -0.2795537 | -5.2298569 | -1.0046139 |
| H | 0.9387153  | -3.6986149 | -2.4811009 |
| H | 4.2278853  | -3.6000119 | 0.2725521  |
| H | 3.1293503  | -2.5303349 | -3.0743139 |
| H | 4.2958613  | -2.2069009 | -1.7687779 |

|   |            |            |            |
|---|------------|------------|------------|
| H | -1.0487807 | -6.9126489 | 2.0650571  |
| H | -0.7989447 | -7.0227069 | 0.3033581  |
| H | -1.3167907 | -5.4746739 | 1.0339221  |
| P | -2.4964897 | 3.4769841  | 1.2584821  |
| C | -3.0147557 | 2.6129581  | 2.7764141  |
| H | -2.1176077 | 2.2525651  | 3.2921961  |
| H | -3.5727137 | 3.2918941  | 3.4325471  |
| H | -3.6484647 | 1.7622651  | 2.5022491  |
| C | -4.0357317 | 4.1829641  | 0.5846621  |
| H | -4.5238617 | 4.8221481  | 1.3298831  |
| H | -3.8163327 | 4.7657951  | -0.3150549 |
| H | -4.7003887 | 3.3602311  | 0.3003941  |
| C | -1.5055867 | 4.8967561  | 1.8264101  |
| H | -2.0897587 | 5.5164721  | 2.5171351  |
| H | -0.6183887 | 4.5128751  | 2.3425471  |
| H | -1.1993677 | 5.5011231  | 0.9669211  |
| C | -5.4106747 | -0.5093899 | -2.4831839 |
| F | -4.5418547 | -0.9531389 | -3.3718509 |
| F | -6.1110617 | 0.4838471  | -3.0061889 |
| F | -6.2256487 | -1.4696349 | -2.1170389 |
| S | -4.4996387 | 0.1970851  | -1.0108539 |
| O | -5.3875007 | 0.0692561  | 0.1324921  |
| O | -4.0803627 | 1.5213801  | -1.4597639 |
| H | 3.0754713  | -1.1279209 | 0.3653321  |
| H | 0.9196423  | 2.3152211  | -0.3636999 |

|   |            |            |            |
|---|------------|------------|------------|
| C | 3.4819713  | 3.1463071  | -1.1681619 |
| C | 4.0387663  | 2.9598211  | -2.5794719 |
| C | 2.3555363  | 4.1738431  | -1.2394359 |
| C | 4.5841853  | 3.6210901  | -0.2234219 |
| H | 4.8717853  | 2.2537631  | -2.5886039 |
| H | 3.2556483  | 2.5873771  | -3.2510969 |
| H | 4.3908393  | 3.9250521  | -2.9622399 |
| H | 1.9115273  | 4.3981521  | -0.2611519 |
| H | 2.7642583  | 5.1112651  | -1.6326399 |
| H | 1.5581333  | 3.8456021  | -1.9193199 |
| H | 5.0187263  | 4.5575041  | -0.5945349 |
| H | 4.1972393  | 3.8070801  | 0.7858271  |
| H | 5.3793953  | 2.8714291  | -0.1631259 |
| N | -3.1227997 | -0.6836609 | -0.8525719 |
| S | -3.1417717 | -2.2488499 | -0.3563329 |
| O | -4.2771217 | -2.9814159 | -0.8825349 |
| O | -1.7825537 | -2.7360469 | -0.5107539 |
| C | -3.4374797 | -2.1286689 | 1.4807031  |
| F | -2.8892527 | -1.0178279 | 1.9507691  |
| F | -4.7237977 | -2.1353229 | 1.7477161  |
| F | -2.8723527 | -3.1809299 | 2.0589221  |
| H | 2.8075923  | 1.6629711  | 1.9311121  |

Zero-point correction= 0.698141 (Hartree/Particle)

Thermal correction to Energy= 0.752881

Thermal correction to Enthalpy= 0.753825

Thermal correction to Gibbs Free Energy= 0.611021

Sum of electronic and zero-point Energies= -3916.929908

Sum of electronic and thermal Energies= -3916.875169

Sum of electronic and thermal Enthalpies= -3916.874224

Sum of electronic and thermal Free Energies= -3917.017028

## E-2

|   |            |            |            |
|---|------------|------------|------------|
| C | -2.7289296 | -3.2669547 | -1.2519244 |
| C | -1.5979816 | -3.7351497 | -1.9247604 |
| C | -0.4460276 | -2.9719087 | -1.9236734 |
| C | -0.4210566 | -1.7385607 | -1.2549924 |
| C | -1.5381136 | -1.2892487 | -0.5258254 |
| C | -2.6947766 | -2.0715707 | -0.5479604 |
| C | 0.7362324  | -0.8636907 | -1.4114184 |
| C | 0.4841374  | 0.5811243  | -1.1251514 |
| C | -0.2028286 | 0.7792493  | 0.2263516  |
| C | -1.5036266 | -0.0428187 | 0.3369406  |
| C | -1.8224206 | -0.4025367 | 1.7837816  |
| C | -3.1831706 | 0.0993403  | 2.1105616  |
| N | -3.5886646 | 0.8615553  | 1.0415116  |
| C | -2.6064356 | 0.9745243  | -0.0128894 |
| C | -1.0250416 | -1.1291297 | 2.5744586  |
| N | -0.6259046 | 2.1596243  | 0.4135036  |
| C | -1.9358016 | 2.3453873  | 0.0644146  |
| O | -2.5235946 | 3.3991093  | -0.1042984 |
| O | -3.8677536 | -0.1309307 | 3.0949816  |

|    |            |            |            |
|----|------------|------------|------------|
| O  | 1.8246834  | -1.2904937 | -1.8222854 |
| Au | 3.6531254  | -0.0256557 | -1.8178104 |
| C  | -1.2629176 | -1.5078257 | 3.9909686  |
| C  | -6.3729936 | -0.5597307 | -2.1556354 |
| C  | -6.7817206 | -1.7627977 | -1.5739934 |
| C  | -6.6587726 | -1.9428037 | -0.1937884 |
| C  | -6.1177716 | -0.9230367 | 0.5847226  |
| C  | -5.6963166 | 0.2779393  | 0.0146706  |
| C  | -5.8386396 | 0.4458473  | -1.3656474 |
| C  | -4.9677786 | 1.2894883  | 0.8569166  |
| O  | -7.2845766 | -2.6891697 | -2.4265014 |
| C  | -7.7186996 | -3.9122427 | -1.8864104 |
| H  | -3.6498716 | -3.8464647 | -1.2653484 |
| H  | -1.6273366 | -4.6830307 | -2.4549564 |
| H  | 0.4473634  | -3.2880787 | -2.4564604 |
| H  | -3.5826646 | -1.7463067 | -0.0052174 |
| H  | 1.4248934  | 1.1418733  | -1.1866094 |
| H  | -2.1989186 | -1.0955147 | 4.3713126  |
| H  | -1.2862776 | -2.6005617 | 4.0907396  |
| H  | -0.4229436 | -1.1643057 | 4.6088036  |
| H  | -6.4887476 | -0.4422097 | -3.2300634 |
| H  | -6.9835026 | -2.8635327 | 0.2823136  |
| H  | -5.9993296 | -1.0662347 | 1.6587646  |
| H  | -5.5229256 | 1.3830083  | -1.8252064 |
| H  | -5.4029266 | 1.3697183  | 1.8590336  |



|   |            |            |            |
|---|------------|------------|------------|
| H | -4.9605296 | 2.2848573  | 0.3967146  |
| H | -8.0845436 | -4.5102887 | -2.7234224 |
| H | -8.5347316 | -3.7723157 | -1.1631104 |
| H | -6.8985906 | -4.4542127 | -1.3919434 |
| P | 5.3624114  | 1.5097363  | -1.8049884 |
| C | 6.9282174  | 0.8214113  | -1.1947184 |
| H | 7.2085224  | -0.0477887 | -1.7975214 |
| H | 7.7176794  | 1.5811063  | -1.2354864 |
| H | 6.7734054  | 0.4798033  | -0.1667084 |
| C | 5.0127394  | 2.9265093  | -0.7181414 |
| H | 5.8643434  | 3.6176723  | -0.7131394 |
| H | 4.1162974  | 3.4499303  | -1.0680764 |
| H | 4.8344924  | 2.5430393  | 0.2937906  |
| C | 5.7624904  | 2.2426403  | -3.4274934 |
| H | 6.5823434  | 2.9639503  | -3.3268824 |
| H | 6.0581944  | 1.4529343  | -4.1247084 |
| H | 4.8797514  | 2.7488803  | -3.8295204 |
| H | -3.0688496 | 0.8158343  | -0.9992684 |
| H | 0.4884734  | 0.4888233  | 1.0202216  |
| C | 0.3215814  | 3.2791923  | 0.6826026  |
| C | -0.3035746 | 4.2098963  | 1.7211636  |
| C | 1.6216804  | 2.7295953  | 1.2622286  |
| C | 0.5944584  | 4.0420113  | -0.6133204 |
| H | -1.2256146 | 4.6627333  | 1.3504586  |
| H | -0.5280076 | 3.6557093  | 2.6399826  |

|   |            |            |            |
|---|------------|------------|------------|
| H | 0.4083064  | 5.0063573  | 1.9678286  |
| H | 2.1712024  | 2.0576993  | 0.5882556  |
| H | 2.2899294  | 3.5712823  | 1.4787946  |
| H | 1.4562654  | 2.1972353  | 2.2055496  |
| H | 1.2482234  | 4.8994323  | -0.4090354 |
| H | 1.0954894  | 3.4073633  | -1.3565904 |
| H | -0.3401996 | 4.4171633  | -1.0427664 |
| H | -0.1817056 | 0.9603603  | -1.9184644 |
| H | -0.0855396 | -1.4805537 | 2.1375496  |
| C | 2.7248884  | -0.9963557 | 2.3036546  |
| F | 2.0858154  | -1.0878377 | 1.1269786  |
| F | 2.1032644  | -0.0724927 | 3.0328486  |
| F | 2.6360664  | -2.1481547 | 2.9240276  |
| S | 4.4881254  | -0.4603857 | 2.0145896  |
| O | 5.2255674  | -1.0097257 | 3.1378526  |
| O | 4.3726364  | 0.9878993  | 1.8521186  |
| N | 4.8776234  | -1.0225837 | 0.5580436  |
| S | 5.0026804  | -2.5864797 | 0.1751466  |
| O | 4.2364864  | -3.4864907 | 1.0237426  |
| O | 4.8873784  | -2.6641797 | -1.2798114 |
| C | 6.7736754  | -2.9907567 | 0.4994066  |
| F | 7.5576454  | -2.1564567 | -0.1775924 |
| F | 7.0454674  | -2.8922267 | 1.7848846  |
| F | 7.0053954  | -4.2270707 | 0.0883516  |

Zero-point correction= 0.703198 (Hartree/Particle)

Thermal correction to Energy= 0.759354

Thermal correction to Enthalpy= 0.760298

Thermal correction to Gibbs Free Energy= 0.608475

Sum of electronic and zero-point Energies= -3916.974915

Sum of electronic and thermal Energies= -3916.918760

Sum of electronic and thermal Enthalpies= -3916.917815

Sum of electronic and thermal Free Energies= -3917.069638

### **E-int5**

|   |            |            |            |
|---|------------|------------|------------|
| C | 0.1971766  | 0.0326606  | 2.8997826  |
| C | 0.6176776  | -1.1649494 | 3.4813496  |
| C | 0.6499406  | -2.3162694 | 2.7154206  |
| C | 0.2428956  | -2.2883304 | 1.3756546  |
| C | -0.2164674 | -1.0922164 | 0.7987556  |
| C | -0.2142014 | 0.0683836  | 1.5763346  |
| C | 0.4064856  | -3.5203744 | 0.5714756  |
| C | 0.0284956  | -3.4406524 | -0.8409014 |
| C | -0.4467304 | -2.3121974 | -1.3801844 |
| C | -0.6981384 | -1.0407864 | -0.6373904 |
| C | -0.0751944 | 0.1325996  | -1.4087744 |
| C | -1.1371014 | 1.1243206  | -1.6952714 |
| N | -2.2897614 | 0.6881636  | -1.0659704 |
| C | -2.2528004 | -0.7204054 | -0.7683234 |
| C | 1.2358006  | 0.2585736  | -1.6968124 |
| N | -3.5997374 | -2.3392644 | 0.5599836  |
| C | -3.0422374 | -1.0831464 | 0.4821556  |

|    |            |            |            |
|----|------------|------------|------------|
| O  | -3.0988234 | -0.3260724 | 1.4366166  |
| O  | -1.0724874 | 2.1604906  | -2.3352794 |
| O  | 0.8948826  | -4.5498474 | 1.0340136  |
| H  | -2.6391544 | -1.3055494 | -1.6213274 |
| Au | 2.5924566  | -1.1354064 | -0.9370084 |
| C  | 1.7424266  | 1.4446496  | -2.4692474 |
| C  | -4.3579454 | -3.1287494 | -0.4480364 |
| C  | -3.4438134 | -3.9512984 | -1.3478584 |
| C  | -5.2766544 | -2.2326054 | -1.2770554 |
| C  | -5.2155474 | -4.0917354 | 0.3700206  |
| C  | -3.3791404 | 4.1195556  | 1.4151886  |
| C  | -3.5240124 | 5.2844656  | 0.6549476  |
| C  | -3.6568834 | 5.1953476  | -0.7294004 |
| C  | -3.6438304 | 3.9408536  | -1.3358874 |
| C  | -3.5135984 | 2.7771906  | -0.5903124 |
| C  | -3.3738004 | 2.8812676  | 0.7983996  |
| C  | -3.5296734 | 1.4271246  | -1.2566174 |
| O  | -3.5189764 | 6.4497826  | 1.3538616  |
| C  | -3.6332054 | 7.6453466  | 0.6273106  |
| H  | 0.1958736  | 0.9525116  | 3.4806636  |
| H  | 0.9315356  | -1.1870384 | 4.5226996  |
| H  | 0.9908546  | -3.2662704 | 3.1216036  |
| H  | -0.5403914 | 1.0093066  | 1.1393466  |
| H  | 0.1870776  | -4.3406684 | -1.4321664 |
| H  | -0.6836184 | -2.2734394 | -2.4454394 |

|   |            |            |            |
|---|------------|------------|------------|
| H | -3.9883264 | -2.4312294 | 1.4943056  |
| H | 1.0312896  | 1.7835216  | -3.2282044 |
| H | 1.8715436  | 2.3005666  | -1.7883294 |
| H | 2.7129586  | 1.2432236  | -2.9374224 |
| H | -2.7727974 | -4.5765014 | -0.7480924 |
| H | -4.0503734 | -4.6032164 | -1.9885734 |
| H | -2.8261104 | -3.3282224 | -2.0029084 |
| H | -5.9265814 | -1.6361044 | -0.6249264 |
| H | -5.9136864 | -2.8455534 | -1.9263724 |
| H | -4.7170354 | -1.5467404 | -1.9244494 |
| H | -5.7982054 | -4.7390794 | -0.2941284 |
| H | -4.5867134 | -4.7298464 | 1.0027876  |
| H | -5.9198574 | -3.5459204 | 1.0108556  |
| H | -3.2717354 | 4.2199226  | 2.4925366  |
| H | -3.7549124 | 6.0851536  | -1.3443054 |
| H | -3.7158914 | 3.8720846  | -2.4204824 |
| H | -3.2522614 | 1.9716776  | 1.3858116  |
| H | -3.7249024 | 1.5489856  | -2.3338894 |
| H | -4.3389014 | 0.8128636  | -0.8392344 |
| H | -3.5995424 | 8.4588456  | 1.3555366  |
| H | -4.5836244 | 7.6998956  | 0.0757036  |
| H | -2.8053744 | 7.7704236  | -0.0861404 |
| P | 4.1981496  | -2.6873884 | -0.0315594 |
| C | 3.8919476  | -3.3905044 | 1.6273026  |
| H | 2.9760056  | -3.9935894 | 1.6049716  |

|   |           |            |            |
|---|-----------|------------|------------|
| H | 4.7405086 | -4.0192604 | 1.9238146  |
| H | 3.7599236 | -2.5860984 | 2.3562286  |
| C | 5.8848256 | -1.9931704 | 0.1077406  |
| H | 6.5948166 | -2.7628204 | 0.4337506  |
| H | 6.1986106 | -1.5746244 | -0.8533064 |
| H | 5.8808426 | -1.1801844 | 0.8435356  |
| C | 4.4078716 | -4.1823884 | -1.0633874 |
| H | 5.1920356 | -4.8318034 | -0.6561764 |
| H | 3.4595966 | -4.7311754 | -1.0766224 |
| H | 4.6638346 | -3.8966494 | -2.0881194 |
| C | 5.4528296 | 3.4366506  | -1.6664304 |
| F | 4.4891776 | 3.3003926  | -2.5537494 |
| F | 6.6050796 | 3.6395556  | -2.2749134 |
| F | 5.1838406 | 4.4314206  | -0.8516684 |
| S | 5.6186616 | 1.8651256  | -0.7026374 |
| O | 6.6035086 | 2.0915726  | 0.3257416  |
| O | 5.7017496 | 0.7950746  | -1.6736314 |
| N | 4.0870776 | 1.7307776  | -0.0230264 |
| S | 3.5136396 | 2.3584106  | 1.4294316  |
| O | 4.2959196 | 3.5116106  | 1.7937146  |
| O | 2.0747506 | 2.3362576  | 1.3285996  |
| C | 3.9659956 | 0.9961956  | 2.5957666  |
| F | 3.4467086 | -0.1371484 | 2.1506476  |
| F | 5.2765126 | 0.8785286  | 2.6689016  |
| F | 3.4654876 | 1.2845546  | 3.7793296  |

|   |           |           |            |
|---|-----------|-----------|------------|
| H | 3.4614806 | 1.0406036 | -0.4806504 |
|---|-----------|-----------|------------|

Zero-point correction= 0.701062 (Hartree/Particle)

Thermal correction to Energy= 0.757806

Thermal correction to Enthalpy= 0.758750

Thermal correction to Gibbs Free Energy= 0.607060

Sum of electronic and zero-point Energies= -3916.913058

Sum of electronic and thermal Energies= -3916.856315

Sum of electronic and thermal Enthalpies= -3916.855371

Sum of electronic and thermal Free Energies= -3917.007061

### **E-ts5**

|   |            |            |            |
|---|------------|------------|------------|
| C | 1.4121954  | -1.4394930 | 2.8862559  |
| C | 2.2555414  | -2.5168810 | 2.6222779  |
| C | 2.3473404  | -3.0010990 | 1.3285479  |
| C | 1.5645714  | -2.4504510 | 0.3086369  |
| C | 0.6733694  | -1.3948980 | 0.5820719  |
| C | 0.6479624  | -0.8721460 | 1.8756319  |
| C | 1.7377544  | -2.9837380 | -1.0593741 |
| C | 0.7976554  | -2.5035610 | -2.0731761 |
| C | -0.0776426 | -1.5257160 | -1.8123731 |
| C | -0.2490616 | -0.8425070 | -0.4796801 |
| C | -0.1433016 | 0.6648980  | -0.7693031 |
| C | -1.5139926 | 1.0861990  | -1.2201801 |
| N | -2.3880076 | 0.0797390  | -0.8857901 |
| C | -1.7958626 | -1.0279350 | -0.1829131 |
| C | 0.9536814  | 1.4615950  | -0.8279361 |

|    |            |            |            |
|----|------------|------------|------------|
| N  | -2.4982166 | -2.1414320 | 1.9464809  |
| C  | -2.1989456 | -0.9862810 | 1.2934499  |
| O  | -2.2471096 | 0.0878030  | 1.8757049  |
| O  | -1.8288306 | 2.0898870  | -1.8298091 |
| O  | 2.6394894  | -3.7690700 | -1.3481961 |
| H  | -2.1254156 | -1.9743050 | -0.6332341 |
| Au | 2.7159604  | 0.2443920  | -1.4397811 |
| C  | 0.8092614  | 2.8779090  | -1.3375981 |
| C  | -2.6736496 | -3.5525260 | 1.5375139  |
| C  | -1.3976926 | -4.1369670 | 0.9385579  |
| C  | -3.8568316 | -3.7095090 | 0.5830419  |
| C  | -2.9862386 | -4.3009760 | 2.8311459  |
| C  | -5.0939306 | 3.1461920  | 0.7224639  |
| C  | -6.0047336 | 3.6853510  | -0.1917321 |
| C  | -6.1744786 | 3.0794110  | -1.4344591 |
| C  | -5.4290306 | 1.9433680  | -1.7442221 |
| C  | -4.5307406 | 1.3931420  | -0.8394881 |
| C  | -4.3682946 | 2.0130300  | 0.4042879  |
| C  | -3.8096956 | 0.1195940  | -1.1974791 |
| O  | -6.6683396 | 4.7959530  | 0.2205419  |
| C  | -7.5695516 | 5.3876900  | -0.6785511 |
| H  | 1.3618844  | -1.0106070 | 3.8835499  |
| H  | 2.8555824  | -2.9521950 | 3.4180439  |
| H  | 3.0151174  | -3.8198800 | 1.0695579  |
| H  | 0.0264554  | -0.0110700 | 2.1005459  |



|   |            |            |            |
|---|------------|------------|------------|
| H | 0.8842354  | -2.9460900 | -3.0637181 |
| H | -0.7413046 | -1.1678210 | -2.6010861 |
| H | -2.7352396 | -1.9342340 | 2.9110179  |
| H | 0.3957064  | 2.8885940  | -2.3512711 |
| H | 0.1094644  | 3.4536730  | -0.7209131 |
| H | 1.7706964  | 3.3945070  | -1.3464331 |
| H | -0.5488166 | -3.9899760 | 1.6173409  |
| H | -1.5299816 | -5.2134500 | 0.7753679  |
| H | -1.1396786 | -3.6931920 | -0.0298801 |
| H | -4.7632426 | -3.2734950 | 1.0194909  |
| H | -4.0445396 | -4.7729320 | 0.3908839  |
| H | -3.6815126 | -3.2313990 | -0.3878081 |
| H | -3.1349656 | -5.3662440 | 2.6257239  |
| H | -2.1599686 | -4.2036030 | 3.5457869  |
| H | -3.9024906 | -3.9165950 | 3.2971109  |
| H | -4.9722526 | 3.6453580  | 1.6805939  |
| H | -6.8644406 | 3.4833130  | -2.1694731 |
| H | -5.5529586 | 1.4830690  | -2.7243831 |
| H | -3.6510946 | 1.6078040  | 1.1165569  |
| H | -3.9536786 | -0.0815770 | -2.2708371 |
| H | -4.2609666 | -0.7282020 | -0.6578451 |
| H | -7.9890616 | 6.2601110  | -0.1727541 |
| H | -8.3880986 | 4.7032200  | -0.9470131 |
| H | -7.0687336 | 5.7161690  | -1.6011631 |
| P | 4.6430734  | -0.8940910 | -2.1250081 |

|   |           |            |            |
|---|-----------|------------|------------|
| C | 5.3797084 | -1.9148090 | -0.8070771 |
| H | 4.7013114 | -2.7500020 | -0.6015001 |
| H | 6.3547994 | -2.3023320 | -1.1259471 |
| H | 5.4980984 | -1.3113160 | 0.0981639  |
| C | 5.9591974 | 0.2788160  | -2.5908051 |
| H | 6.8664154 | -0.2584390 | -2.8920491 |
| H | 5.6136484 | 0.9164960  | -3.4100331 |
| H | 6.1759454 | 0.9254520  | -1.7335771 |
| C | 4.4786264 | -2.0400150 | -3.5340201 |
| H | 5.4577544 | -2.4552350 | -3.8013171 |
| H | 3.8069844 | -2.8544460 | -3.2372071 |
| H | 4.0579694 | -1.5139650 | -4.3962551 |
| C | 4.1831894 | 4.8525840  | 0.3522469  |
| F | 2.9169174 | 5.2059640  | 0.4588299  |
| F | 4.7205804 | 5.4419720  | -0.7026671 |
| F | 4.8481674 | 5.1954080  | 1.4297609  |
| S | 4.2981444 | 3.0074910  | 0.0527159  |
| O | 5.5467244 | 2.5573490  | 0.6442289  |
| O | 4.0772864 | 2.8570510  | -1.3784981 |
| N | 2.9793644 | 2.3556480  | 0.8068349  |
| S | 2.9282374 | 2.2432000  | 2.4526619  |
| O | 3.5177904 | 3.4054720  | 3.0853059  |
| O | 1.5985924 | 1.7733970  | 2.7818949  |
| C | 4.0724684 | 0.8191740  | 2.8485699  |
| F | 4.0559484 | -0.0583810 | 1.8520039  |

|   |           |           |           |
|---|-----------|-----------|-----------|
| F | 5.3006434 | 1.2351150 | 3.0528629 |
| F | 3.6280074 | 0.2341730 | 3.9517829 |
| H | 2.0731034 | 1.6983470 | 0.0897669 |

Zero-point correction= 0.695657 (Hartree/Particle)

Thermal correction to Energy= 0.751945

Thermal correction to Enthalpy= 0.752890

Thermal correction to Gibbs Free Energy= 0.603532

Sum of electronic and zero-point Energies= -3916.894470

Sum of electronic and thermal Energies= -3916.838182

Sum of electronic and thermal Enthalpies= -3916.837238

Sum of electronic and thermal Free Energies= -3916.986596

#### **H-int6**

|   |            |            |            |
|---|------------|------------|------------|
| C | 2.1046064  | 2.8812201  | -1.0035984 |
| C | 1.6171064  | 3.2493171  | -2.2575744 |
| C | 0.6004784  | 2.5065321  | -2.8305094 |
| C | 0.0809524  | 1.3855551  | -2.1725564 |
| C | 0.5912524  | 0.9904791  | -0.9244364 |
| C | 1.5930274  | 1.7735411  | -0.3428754 |
| C | -1.0647136 | 0.6859451  | -2.7995514 |
| C | -1.6680356 | -0.4071769 | -2.0344184 |
| C | -1.1653836 | -0.8033319 | -0.8588074 |
| C | 0.0867294  | -0.2729989 | -0.2466064 |
| C | -0.0190686 | -0.1004179 | 1.2638446  |
| C | 1.2622884  | -0.5544879 | 1.8687356  |
| N | 1.9933794  | -1.1337319 | 0.8543236  |

|    |            |            |            |
|----|------------|------------|------------|
| C  | 1.1631414  | -1.4369539 | -0.2899374 |
| C  | -1.0933066 | 0.3551381  | 1.9188516  |
| N  | 1.5509134  | -2.4786509 | -2.5031094 |
| C  | 1.9117514  | -1.5062539 | -1.6108674 |
| O  | 2.7498094  | -0.6687509 | -1.9090804 |
| O  | 1.6476254  | -0.4508129 | 3.0203236  |
| O  | -1.5404856 | 1.0485761  | -3.8718204 |
| H  | 0.6111934  | -2.3756109 | -0.1254824 |
| Au | -3.9426466 | 1.1298251  | -0.3745524 |
| C  | -1.2602546 | 0.4936341  | 3.3881246  |
| C  | 1.0408414  | -3.8653959 | -2.3305764 |
| C  | -0.4585126 | -3.9125519 | -2.0489854 |
| C  | 1.8285454  | -4.6050669 | -1.2503144 |
| C  | 1.2936524  | -4.5426329 | -3.6758894 |
| C  | 5.6485144  | 1.2841261  | 0.7721836  |
| C  | 6.1933684  | 1.3736721  | 2.0576786  |
| C  | 5.7988514  | 0.4679821  | 3.0408456  |
| C  | 4.8631484  | -0.5157449 | 2.7266476  |
| C  | 4.3250314  | -0.6228849 | 1.4506306  |
| C  | 4.7278084  | 0.2954891  | 0.4728066  |
| C  | 3.3128884  | -1.6911269 | 1.1256896  |
| O  | 7.0907744  | 2.3743871  | 2.2491856  |
| C  | 7.6641174  | 2.5016371  | 3.5252666  |
| H  | 2.8996744  | 3.4558101  | -0.5330814 |
| H  | 2.0282384  | 4.1124721  | -2.7753454 |

|   |            |            |            |
|---|------------|------------|------------|
| H | 0.1781264  | 2.7634391  | -3.7997074 |
| H | 2.0084074  | 1.5086641  | 0.6258346  |
| H | -2.5646626 | -0.8672319 | -2.4451804 |
| H | -1.6650826 | -1.5999759 | -0.3080604 |
| H | 2.0887354  | -2.3435489 | -3.3537504 |
| H | -0.3500606 | 0.2301421  | 3.9291406  |
| H | -1.5562766 | 1.5202191  | 3.6382866  |
| H | -2.0937206 | -0.1391629 | 3.7225326  |
| H | -1.0140696 | -3.3258909 | -2.7889074 |
| H | -0.8057926 | -4.9514239 | -2.1010444 |
| H | -0.7217826 | -3.5399389 | -1.0541214 |
| H | 2.9015104  | -4.5911109 | -1.4781424 |
| H | 1.5029544  | -5.6510769 | -1.1996034 |
| H | 1.6845184  | -4.1707799 | -0.2536124 |
| H | 0.9490384  | -5.5815759 | -3.6468204 |
| H | 0.7519614  | -4.0276029 | -4.4786044 |
| H | 2.3636394  | -4.5493269 | -3.9202384 |
| H | 5.9759044  | 2.0023201  | 0.0238356  |
| H | 6.1964554  | 0.5236751  | 4.0498666  |
| H | 4.5292484  | -1.2020259 | 3.5032636  |
| H | 4.2978774  | 0.2291981  | -0.5261824 |
| H | 3.2407994  | -2.4027689 | 1.9615696  |
| H | 3.6191354  | -2.2527539 | 0.2340636  |
| H | 8.3538914  | 3.3469791  | 3.4751836  |
| H | 8.2247834  | 1.5999841  | 3.8123726  |

|   |            |            |            |
|---|------------|------------|------------|
| H | 6.9056374  | 2.7046251  | 4.2954286  |
| P | -3.3887376 | 3.2530201  | -1.0951994 |
| C | -4.6568856 | 4.4297131  | -0.5117054 |
| H | -4.7824866 | 4.3132471  | 0.5699336  |
| H | -4.3624276 | 5.4608601  | -0.7411464 |
| H | -5.6136956 | 4.2076621  | -0.9945594 |
| C | -3.2189966 | 3.6118971  | -2.8700854 |
| H | -2.9538006 | 4.6676221  | -3.0041974 |
| H | -2.4598486 | 2.9684571  | -3.3287254 |
| H | -4.1747596 | 3.4118871  | -3.3644834 |
| C | -1.8549136 | 3.8314241  | -0.2981604 |
| H | -1.6121526 | 4.8510441  | -0.6204474 |
| H | -2.0015796 | 3.8128191  | 0.7874996  |
| H | -1.0256926 | 3.1603941  | -0.5458024 |
| H | -1.9682616 | 0.6319661  | 1.3169726  |
| C | -6.9265416 | 0.4978721  | 1.9239946  |
| F | -6.8585366 | 1.5215781  | 1.0779706  |
| F | -7.4551456 | 0.9106781  | 3.0623356  |
| F | -7.6688546 | -0.4528339 | 1.4017366  |
| S | -5.2202756 | -0.1216399 | 2.2779886  |
| O | -5.3674836 | -1.2738209 | 3.1454126  |
| O | -4.4901376 | 1.0641431  | 2.6986676  |
| N | -4.6545626 | -0.5464219 | 0.7900086  |
| S | -4.7593336 | -2.0959059 | 0.2198366  |
| O | -6.0600096 | -2.7003289 | 0.4118446  |

|   |            |            |            |
|---|------------|------------|------------|
| O | -4.1223326 | -2.0623599 | -1.0874864 |
| C | -3.5747426 | -3.0735499 | 1.3004246  |
| F | -2.6571316 | -2.2725469 | 1.8286206  |
| F | -4.2162046 | -3.7079929 | 2.2493636  |
| F | -2.9629496 | -3.9526889 | 0.5168266  |

Zero-point correction= 0.701529 (Hartree/Particle)

Thermal correction to Energy= 0.758668

Thermal correction to Enthalpy= 0.759613

Thermal correction to Gibbs Free Energy= 0.606364

Sum of electronic and zero-point Energies= -3916.952702

Sum of electronic and thermal Energies= -3916.895563

Sum of electronic and thermal Enthalpies= -3916.894618

Sum of electronic and thermal Free Energies= -3917.047867

### **H-ts6**

|   |            |           |            |
|---|------------|-----------|------------|
| C | -1.3195133 | 0.4843175 | 3.0304735  |
| C | -1.8110873 | 1.3024115 | 2.0077375  |
| C | 0.1375937  | 0.2266675 | 3.1878105  |
| C | 1.0541077  | 0.8070905 | 2.1641225  |
| C | 0.5566997  | 1.8096645 | 1.3047715  |
| C | -0.8925583 | 1.7941125 | 0.8847215  |
| C | -1.3848903 | 3.1038815 | 0.3025345  |
| C | -2.2443383 | 2.7927895 | -0.8738435 |
| N | -2.1020393 | 1.4438765 | -1.1168555 |
| C | -1.0694253 | 0.8173685 | -0.3192065 |
| C | -1.1143533 | 4.3207305 | 0.7871275  |

|    |            |            |            |
|----|------------|------------|------------|
| N  | 1.2753877  | 1.5161035  | -0.7407695 |
| C  | 0.1930057  | 0.6803915  | -1.1741555 |
| O  | 0.1924017  | -0.0020715 | -2.1711695 |
| O  | -2.9745213 | 3.5337805  | -1.5085525 |
| O  | 0.5747917  | -0.3737065 | 4.1573415  |
| Au | 1.1735127  | -1.1822765 | 1.1046425  |
| C  | -1.5464643 | 5.6241155  | 0.2159445  |
| C  | -3.0932053 | -3.0288755 | -2.0918725 |
| C  | -3.8408743 | -3.2274655 | -0.9281825 |
| C  | -4.2862833 | -2.1237065 | -0.1959875 |
| C  | -3.9743303 | -0.8405435 | -0.6371565 |
| C  | -3.2095973 | -0.6288985 | -1.7825495 |
| C  | -2.7735663 | -1.7441655 | -2.5017685 |
| C  | -2.8016683 | 0.7584815  | -2.1920645 |
| O  | -4.0551073 | -4.5191685 | -0.5786635 |
| C  | -4.7360633 | -4.7671995 | 0.6278785  |
| H  | -2.2005853 | 5.4909955  | -0.6475245 |
| H  | -2.0679023 | 6.2211835  | 0.9740445  |
| H  | -0.6651583 | 6.2087165  | -0.0819925 |
| H  | -2.7511193 | -3.9036915 | -2.6406105 |
| H  | -4.8681113 | -2.2477335 | 0.7128735  |
| H  | -4.3117983 | 0.0169805  | -0.0548915 |
| H  | -2.1554543 | -1.5981845 | -3.3874065 |
| H  | -3.6612693 | 1.3979225  | -2.4319275 |
| H  | -2.1689323 | 0.7112035  | -3.0905855 |



|   |            |            |            |
|---|------------|------------|------------|
| H | -4.7883433 | -5.8519825 | 0.7386125  |
| H | -5.7571343 | -4.3608955 | 0.6110435  |
| H | -4.1980013 | -4.3427525 | 1.4889175  |
| P | 0.7674957  | -3.2545055 | 0.0909485  |
| C | 1.9899107  | -4.5647455 | 0.4010805  |
| H | 2.0653747  | -4.7456545 | 1.4777945  |
| H | 1.6897737  | -5.4878925 | -0.1087305 |
| H | 2.9680247  | -4.2274745 | 0.0412665  |
| C | 0.5644217  | -3.1787045 | -1.7115085 |
| H | 0.2951077  | -4.1709195 | -2.0945785 |
| H | -0.2262043 | -2.4582505 | -1.9483505 |
| H | 1.4969537  | -2.8238415 | -2.1589535 |
| C | -0.8254753 | -3.9171175 | 0.6962775  |
| H | -1.0992963 | -4.8363365 | 0.1627715  |
| H | -0.7584203 | -4.1167455 | 1.7706885  |
| H | -1.6065823 | -3.1643775 | 0.5262355  |
| H | -1.3899773 | -0.1867935 | -0.0014545 |
| H | 1.1013287  | 2.7484425  | 1.2341325  |
| C | 1.7862547  | 2.5340215  | -1.7524335 |
| C | 0.6373147  | 3.1839915  | -2.5093695 |
| C | 2.5368497  | 3.5863815  | -0.9473945 |
| C | 2.7320537  | 1.8380845  | -2.7267635 |
| H | 0.0546487  | 2.4608645  | -3.0924885 |
| H | -0.0347953 | 3.7363225  | -1.8427905 |
| H | 1.0576907  | 3.9062265  | -3.2181875 |

|   |            |            |            |
|---|------------|------------|------------|
| H | 3.2852677  | 3.1304195  | -0.2886345 |
| H | 3.0501927  | 4.2726185  | -1.6313735 |
| H | 1.8479807  | 4.1813795  | -0.3324565 |
| H | 3.0913067  | 2.5668395  | -3.4640715 |
| H | 3.6016997  | 1.4275495  | -2.2025595 |
| H | 2.2309127  | 1.0194495  | -3.2519975 |
| H | -0.4869673 | 4.3718885  | 1.6828055  |
| H | 2.0592397  | 0.9780425  | 2.5507855  |
| C | -2.1824703 | -0.0495465 | 3.9891365  |
| C | -3.1773563 | 1.5923065  | 1.9845345  |
| H | -1.7426003 | -0.6585235 | 4.7754295  |
| H | -3.5847903 | 2.2638705  | 1.2319805  |
| C | -4.0340933 | 1.0490865  | 2.9356895  |
| C | -3.5415393 | 0.2156615  | 3.9367945  |
| H | -5.0935163 | 1.2935825  | 2.8997845  |
| H | -4.2126223 | -0.2023475 | 4.6830285  |
| H | 2.0941157  | 0.9343155  | -0.4849595 |
| C | 5.7887677  | -1.0100285 | -1.6390065 |
| F | 5.8003657  | 0.2013195  | -2.1687955 |
| F | 5.8515317  | -1.9110555 | -2.6088735 |
| F | 6.8204407  | -1.1660445 | -0.8376915 |
| S | 4.1943887  | -1.2994295 | -0.7278775 |
| O | 4.4608127  | -2.4561965 | 0.1231275  |
| O | 3.1912317  | -1.4214095 | -1.7821505 |
| N | 3.8182167  | 0.0433675  | 0.0864385  |

|   |           |            |           |
|---|-----------|------------|-----------|
| S | 4.7628377 | 0.7890135  | 1.1717465 |
| O | 6.1228817 | 1.0177735  | 0.7148085 |
| O | 3.9662467 | 1.8982425  | 1.6884745 |
| C | 4.9389777 | -0.3650145 | 2.6153555 |
| F | 3.7679147 | -0.9186905 | 2.9128885 |
| F | 5.8167527 | -1.3090845 | 2.3439655 |
| F | 5.3576207 | 0.3401985  | 3.6526215 |

Zero-point correction= 0.700401 (Hartree/Particle)

Thermal correction to Energy= 0.755850

Thermal correction to Enthalpy= 0.756795

Thermal correction to Gibbs Free Energy= 0.610197

Sum of electronic and zero-point Energies= -3916.921123

Sum of electronic and thermal Energies= -3916.865674

Sum of electronic and thermal Enthalpies= -3916.864729

Sum of electronic and thermal Free Energies= -3917.011327

### **H-int7**

|   |            |           |            |
|---|------------|-----------|------------|
| C | -1.1409083 | 1.0723612 | 3.0284633  |
| C | -1.8247833 | 1.3084792 | 1.8323823  |
| C | 0.3515397  | 1.1291152 | 3.1044653  |
| C | 1.0573097  | 1.1698702 | 1.8122123  |
| C | 0.3970627  | 2.0287212 | 0.7616063  |
| C | -1.1127353 | 1.7607652 | 0.5635493  |
| C | -1.8690283 | 2.9386242 | -0.0402587 |
| C | -2.6052673 | 2.4695782 | -1.2466927 |
| N | -2.2559033 | 1.1460342 | -1.4275467 |

|    |            |            |            |
|----|------------|------------|------------|
| C  | -1.1817973 | 0.7172102  | -0.5635597 |
| C  | -1.9134853 | 4.1687522  | 0.4841093  |
| N  | 1.0765097  | 1.7437692  | -0.5921717 |
| C  | 0.1252567  | 0.8145102  | -1.3268587 |
| O  | 0.3680337  | 0.3602572  | -2.3990667 |
| O  | -3.3887633 | 3.0742562  | -1.9566647 |
| O  | 0.9198557  | 1.0514702  | 4.1848583  |
| Au | 1.1163997  | -0.9394258 | 1.3099133  |
| C  | -2.6319413 | 5.3495672  | -0.0636697 |
| C  | -2.2793183 | -3.4194798 | -2.1031637 |
| C  | -3.2155573 | -3.7194348 | -1.1097167 |
| C  | -4.0275903 | -2.7049808 | -0.5957167 |
| C  | -3.8922963 | -1.4089178 | -1.0848997 |
| C  | -2.9578443 | -1.0949338 | -2.0695127 |
| C  | -2.1472663 | -2.1195358 | -2.5658817 |
| C  | -2.7677843 | 0.3264972  | -2.5170327 |
| O  | -3.2468363 | -5.0102958 | -0.7004217 |
| C  | -4.1416423 | -5.3511158 | 0.3315343  |
| H  | -3.1850763 | 5.1013222  | -0.9711597 |
| H  | -3.3268123 | 5.7521402  | 0.6838463  |
| H  | -1.9182953 | 6.1558032  | -0.2811217 |
| H  | -1.6592093 | -4.2264678 | -2.4868877 |
| H  | -4.7637723 | -2.9114778 | 0.1753643  |
| H  | -4.5252253 | -0.6189498 | -0.6802627 |
| H  | -1.3949943 | -1.8892798 | -3.3199657 |

|   |            |            |            |
|---|------------|------------|------------|
| H | -3.7084373 | 0.8016522  | -2.8230067 |
| H | -2.0856493 | 0.3658522  | -3.3785637 |
| H | -4.0068783 | -6.4179158 | 0.5200473  |
| H | -5.1859413 | -5.1691068 | 0.0414163  |
| H | -3.9254823 | -4.7929328 | 1.2547763  |
| P | 1.0171287  | -3.2440908 | 0.7863893  |
| C | 2.2758397  | -4.2902778 | 1.5878133  |
| H | 2.2080527  | -4.1837798 | 2.6749543  |
| H | 2.1406457  | -5.3426078 | 1.3111633  |
| H | 3.2597357  | -3.9411638 | 1.2563153  |
| C | 1.1191487  | -3.6778708 | -0.9796257 |
| H | 0.8496867  | -4.7324038 | -1.1190827 |
| H | 0.4354767  | -3.0374788 | -1.5470777 |
| H | 2.1340747  | -3.4901558 | -1.3376127 |
| C | -0.5958963 | -3.9372618 | 1.3043663  |
| H | -0.6993363 | -4.9844988 | 0.9936723  |
| H | -0.6990433 | -3.8583178 | 2.3915243  |
| H | -1.3934583 | -3.3459088 | 0.8357833  |
| H | -1.3262883 | -0.3157888 | -0.2114717 |
| H | 0.5550117  | 3.0932092  | 0.9641003  |
| C | 1.6210447  | 2.9362412  | -1.4766937 |
| C | 0.5021087  | 3.5635102  | -2.2888057 |
| C | 2.2606467  | 3.9483272  | -0.5388487 |
| C | 2.6926297  | 2.3466522  | -2.3843517 |
| H | 0.0469837  | 2.8603492  | -2.9956757 |

|   |            |            |            |
|---|------------|------------|------------|
| H | -0.2792463 | 4.0030892  | -1.6610347 |
| H | 0.9418717  | 4.3740482  | -2.8805847 |
| H | 2.9392057  | 3.4678832  | 0.1788763  |
| H | 2.8626807  | 4.6297442  | -1.1507447 |
| H | 1.5246187  | 4.5608382  | -0.0054557 |
| H | 3.0155527  | 3.1310422  | -3.0779277 |
| H | 3.5624477  | 2.0296542  | -1.8013787 |
| H | 2.3301877  | 1.4943132  | -2.9655717 |
| H | -1.3506573 | 4.3307882  | 1.4100793  |
| H | 2.0942387  | 1.4857602  | 1.9687923  |
| C | -1.8424673 | 0.7154962  | 4.1821583  |
| C | -3.2141863 | 1.1494012  | 1.8136533  |
| H | -1.2603983 | 0.5600232  | 5.0876533  |
| H | -3.7729173 | 1.3483302  | 0.9008333  |
| C | -3.9029183 | 0.7655512  | 2.9563133  |
| C | -3.2178133 | 0.5565822  | 4.1521483  |
| H | -4.9835733 | 0.6474472  | 2.9165353  |
| H | -3.7588563 | 0.2725202  | 5.0516023  |
| H | 1.9399847  | 1.1790802  | -0.3908347 |
| C | 5.2556427  | -0.8139638 | -2.2552217 |
| F | 5.2729277  | 0.4627372  | -2.6138927 |
| F | 5.0048777  | -1.5564238 | -3.3248877 |
| F | 6.4210367  | -1.1581988 | -1.7598767 |
| S | 3.8659927  | -1.1276758 | -1.0504817 |
| O | 4.2444937  | -2.3669398 | -0.3768197 |

|   |           |            |            |
|---|-----------|------------|------------|
| O | 2.6721517 | -1.1249568 | -1.8903467 |
| N | 3.7074927 | 0.1708752  | -0.0943147 |
| S | 4.8668017 | 0.7129732  | 0.9057523  |
| O | 6.2155707 | 0.4415102  | 0.4369693  |
| O | 4.4620137 | 2.0604052  | 1.2905903  |
| C | 4.7284937 | -0.2725378 | 2.4722663  |
| F | 3.5808017 | -0.0337518 | 3.0864923  |
| F | 4.8198977 | -1.5667608 | 2.2153473  |
| F | 5.7244107 | 0.0920702  | 3.2617323  |

Zero-point correction= 0.703839 (Hartree/Particle)

Thermal correction to Energy= 0.759133

Thermal correction to Enthalpy= 0.760078

Thermal correction to Gibbs Free Energy= 0.613853

Sum of electronic and zero-point Energies= -3916.943894

Sum of electronic and thermal Energies= -3916.888599

Sum of electronic and thermal Enthalpies= -3916.887655

Sum of electronic and thermal Free Energies= -3917.033879

### **H-ts7**

|   |            |            |           |
|---|------------|------------|-----------|
| C | 1.0051856  | -0.7601719 | 2.8407415 |
| C | 1.8092096  | -1.0037029 | 1.7194025 |
| C | -0.4262404 | -1.1703199 | 2.8983595 |
| C | -1.0210864 | -1.6499209 | 1.6124415 |
| C | -0.0901794 | -2.3957949 | 0.6687245 |
| C | 1.3114256  | -1.7720489 | 0.5039085 |
| C | 2.3556576  | -2.7866349 | 0.0450705 |

|    |            |            |            |
|----|------------|------------|------------|
| C  | 3.0832746  | -2.2218609 | -1.1285425 |
| N  | 2.4234836  | -1.0641359 | -1.4719325 |
| C  | 1.1921356  | -0.8805479 | -0.7484805 |
| C  | 2.6128776  | -3.9542479 | 0.6449765  |
| N  | -0.7990644 | -2.2101669 | -0.6462745 |
| C  | 0.0251026  | -1.4544879 | -1.5345115 |
| O  | -0.1490354 | -1.3084989 | -2.7153995 |
| O  | 4.0853126  | -2.6393009 | -1.6824155 |
| O  | -1.0766314 | -1.0792479 | 3.9263675  |
| Au | -1.4168164 | 0.5718661  | 1.0580965  |
| C  | 3.6361736  | -4.9588059 | 0.2522275  |
| C  | 1.7658806  | 3.4191311  | -2.2721545 |
| C  | 2.6883456  | 3.8965791  | -1.3377595 |
| C  | 3.6764396  | 3.0432851  | -0.8398325 |
| C  | 3.7161706  | 1.7214991  | -1.2753735 |
| C  | 2.7904626  | 1.2280001  | -2.1921775 |
| C  | 1.8069116  | 2.0939841  | -2.6774985 |
| C  | 2.8097956  | -0.2200489 | -2.5908415 |
| O  | 2.5280566  | 5.1899081  | -0.9597875 |
| C  | 3.4604016  | 5.7284001  | -0.0536485 |
| H  | 4.2042346  | -4.6354739 | -0.6211565 |
| H  | 4.3286666  | -5.1342019 | 1.0852905  |
| H  | 3.1590256  | -5.9248059 | 0.0430555  |
| H  | 1.0170616  | 4.1079661  | -2.6554605 |
| H  | 4.4104196  | 3.3930631  | -0.1195155 |



|   |            |            |            |
|---|------------|------------|------------|
| H | 4.4886876  | 1.0545631  | -0.8907125 |
| H | 1.0605666  | 1.7172321  | -3.3775385 |
| H | 3.8130626  | -0.5586949 | -2.8778625 |
| H | 2.1356496  | -0.3960299 | -3.4394375 |
| H | 3.1790586  | 6.7721051  | 0.0997065  |
| H | 4.4839036  | 5.6886171  | -0.4520245 |
| H | 3.4360106  | 5.2044881  | 0.9140875  |
| P | -1.0209224 | 2.8861811  | 0.9992175  |
| C | -2.0244884 | 3.8857811  | 2.1446745  |
| H | -1.9303974 | 3.4990091  | 3.1638725  |
| H | -1.7025534 | 4.9334861  | 2.1147925  |
| H | -3.0719954 | 3.8173951  | 1.8351515  |
| C | -1.2107024 | 3.7029211  | -0.6127655 |
| H | -0.7206624 | 4.6846341  | -0.5873895 |
| H | -0.7634784 | 3.0736961  | -1.3873425 |
| H | -2.2782114 | 3.8000701  | -0.8331565 |
| C | 0.7157326  | 3.1908281  | 1.4802445  |
| H | 0.9407766  | 4.2652041  | 1.4637905  |
| H | 0.8985446  | 2.7812311  | 2.4801135  |
| H | 1.3774686  | 2.6759631  | 0.7709725  |
| H | 1.0062346  | 0.1836601  | -0.5237955 |
| H | -0.0085104 | -3.4623969 | 0.9065705  |
| C | -1.6622034 | -3.3324039 | -1.2171605 |
| C | -0.7319564 | -4.3386569 | -1.8851155 |
| C | -2.4482164 | -3.9983649 | -0.0942305 |

|   |            |            |            |
|---|------------|------------|------------|
| C | -2.6640764 | -2.7367979 | -2.1984505 |
| H | -0.1755984 | -3.8874169 | -2.7132095 |
| H | -0.0158164 | -4.7639059 | -1.1690135 |
| H | -1.3273594 | -5.1644229 | -2.2911755 |
| H | -3.1650604 | -3.3096539 | 0.3686695  |
| H | -3.0323044 | -4.8109299 | -0.5402195 |
| H | -1.8137634 | -4.4529299 | 0.6757025  |
| H | -3.3233004 | -3.5415499 | -2.5445665 |
| H | -3.2783624 | -1.9866709 | -1.6901965 |
| H | -2.1831944 | -2.2790179 | -3.0637755 |
| H | 2.0081406  | -4.2033659 | 1.5239535  |
| H | -1.9396354 | -2.2071769 | 1.8265935  |
| C | 1.5111446  | -0.0544769 | 3.9372165  |
| C | 3.1142526  | -0.5001109 | 1.7209215  |
| H | 0.8478786  | 0.0902521  | 4.7870705  |
| H | 3.7681806  | -0.6870889 | 0.8721395  |
| C | 3.6001816  | 0.2288481  | 2.7977265  |
| C | 2.8010886  | 0.4476661  | 3.9192815  |
| H | 4.6173666  | 0.6133481  | 2.7670955  |
| H | 3.1878536  | 1.0024111  | 4.7706385  |
| H | -1.4371474 | -1.2598969 | 0.2195205  |
| C | -4.9393004 | 0.7736921  | -2.6445765 |
| F | -5.0232974 | -0.5304399 | -2.8579595 |
| F | -4.4814754 | 1.3651471  | -3.7379315 |
| F | -6.1261874 | 1.2572511  | -2.3583475 |

|   |            |            |            |
|---|------------|------------|------------|
| S | -3.7190214 | 1.1198511  | -1.2761175 |
| O | -4.1355884 | 2.4026001  | -0.7103645 |
| O | -2.4114344 | 1.0375361  | -1.9271775 |
| N | -3.7706644 | -0.1341759 | -0.2584205 |
| S | -5.0689704 | -0.5481889 | 0.6139905  |
| O | -6.3236404 | -0.0180139 | 0.1064095  |
| O | -4.9315524 | -1.9588869 | 0.9479065  |
| C | -4.8107964 | 0.2987911  | 2.2375505  |
| F | -3.7053844 | -0.1560789 | 2.8257875  |
| F | -4.6918814 | 1.6087731  | 2.0751385  |
| F | -5.8453264 | 0.0452591  | 3.0176225  |

Zero-point correction= 0.697470 (Hartree/Particle)

Thermal correction to Energy= 0.752489

Thermal correction to Enthalpy= 0.753434

Thermal correction to Gibbs Free Energy= 0.608532

Sum of electronic and zero-point Energies= -3916.901854

Sum of electronic and thermal Energies= -3916.846834

Sum of electronic and thermal Enthalpies= -3916.845890

Sum of electronic and thermal Free Energies= -3916.990792
